# Supplementary material for: Relative-humidity-dependent organic aerosol thermodynamics via an efficient reduced-complexity model
Source: Copernicus journal article supplement (doi:10.5194/acp-19-13383-2019), 2019-10-30
Supplement: Supplementary file 1 [file acp-19-13383-2019-supplement.zip]

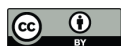

*Supplement of*

## **Relative-humidity-dependent organic aerosol thermodynamics via an efficient reduced-complexity model**

**Kyle Gorkowski et al.**

*Correspondence to:* Kyle Gorkowski ([kyle.gorkowski@mcgill.ca](mailto:kyle.gorkowski@mcgill.ca)) and Andreas Zuend ([andreas.zuend@mcgill.ca](mailto:andreas.zuend@mcgill.ca))

- [acp-19-13383-2019-supplement-title-page.pdf](#)
- SI\_for\_ACP
  - SI\_ACP.pdf
  - data\_used\_in\_paper.xlsx

The copyright of individual parts of the supplement might differ from the CC BY 4.0 License.
