# Supplementary material for: Relative-humidity-dependent organic aerosol thermodynamics via an efficient reduced-complexity model
Source: Copernicus journal article supplement (doi:10.5194/acp-19-13383-2019), 2019-10-30
Supplement: Supplementary file 3 [file acp-19-13383-2019-supplement.zip]

Archive with 4 entries (3 files):
- SI_for_ACP/
- SI_for_ACP/data_used_in_paper.xlsx
- SI_for_ACP/SI_ACP.pdf
- acp-19-13383-2019-supplement-title-page.pdf
