# Supplementary material for: Relative-humidity-dependent organic aerosol thermodynamics via an efficient reduced-complexity model
Source: Copernicus journal article supplement (doi:10.5194/acp-19-13383-2019), 2019-10-30
Supplement: Supplementary file 3 [file acp-19-13383-2019-supplement.zip › SI_for_ACP/data_used_in_paper.xlsx]

## Sheet: BAT model coefficents
BAT model coefficents for hydroxyl fit eq 17 and 18												Fit error
	data used based on O:C fit region	a_1,1	a_2,1	a_1,2	a_2,2	a_1,3	a_2,3	a_1,4	a_2,4	s_2	s_1	sum((ln(activity coefficient org BAT) -ln(activity coefficient org AIOMFAC))^2+(ln(activity coefficient water BAT) -ln(activity coefficient water AIOMFAC))^2)	data points used			total possible points
low O:C region	O:C < 0.15	7.08948	-0.622678	-7.71186	-100	-38.8594	3.08124e-09	-100	61.8881	-5.9889	6.94069	4223.27	1000			6400
mid O:C region	0.05 < O:C < 0.1+ miscibility line	5.87221	-0.974049	-4.53501	-100	-5.12933	2.10975	-28.0923	-23.6768	-1.21916	4.74273	4946.47	2680
high O:C region	miscibility line < O:C	5.92155	-100	-2.52829	-100	-3.88302	1.35392	-7.89813	-11.6014	-0.0786819	3.65086	894.514	3600
initial fit for miscibility line	0.05 < O:C < 0.45	5.88511	-0.984901	-4.73125	-6.22721	-5.20165	2.32029	-30.823	-25.8404	-1.23723	4.06991	4970.42	2360
Region Transition coefficents	b_1	b_2	b_ML
low O:C region to mid O:C region	79.2607	0.0604293	0.189974
mid O:C region to high O:C region	75.0159	0.000947111
BAT translation coefficents and error fits
	Hydroxyl (data used in fit)	Hydroxyl and Carboxyl (validation data)	Carboxyl	hydroperoxide	hydroperoxideSOA	PEG	ketone	ether	ester
t_1	none	none	none	8.1716e-06	0.000149021	0.00544768	0.00453426	2.44336e-05	-1.29325
t_2	none	none	none	4.53183e-07	0.00473628	3.86434	0.00064845	0.000158316	0.00108128
t_3	none	none	none	0.96609	0.869058	-0.267168	0.138144	0.284974	1.24051
t_4	none	none	none	0.459433	0.564783	0.255487	0.352454	0.229339	0.405354
Data points in error calculation (activity<1)	5511	607	451	573	910	120	421	557	488
RMSE water activity	0.058	0.0667	0.0408	0.069	0.0711	0.0335	0.0845	0.073	0.082
RMSE organic activity	0.0901	0.0964	0.0771	0.095	0.0982	0.052	0.132	0.097	0.145
RMSE of the LLPS water activity point	0.0066	0.0127	0.0031	0.0039	0.0061	none	0.0075	0.0032	0.0024
compounds that had LLPS	52	4	5	9	5	none	10	9	21

## Sheet: data used in BAT model Fitting
Chemical Name	Used Fit	O:C	M	notes		translations	Chemical Name	Used Fit	O:C	M		The x_org, y_org, and y_w, data for each compound are used for in the fit, but are not listed here. The data is generated from AIOMFAC
' Hexacosane'	Hydroxyl BAT Fit	0	366.701				' C97OOH'	hydroperoxideSOA (multifunctional hydroperoxide)	0.44444	188.176
' Nonadecane'	Hydroxyl BAT Fit	0	268.535				' C107OOH'	hydroperoxideSOA (multifunctional hydroperoxide)	0.4	200.178
' OHcarbonChainSim'	Hydroxyl BAT Fit	0	54.0907				' C108OOH'	hydroperoxideSOA (multifunctional hydroperoxide)	0.5	216.149
' OHcarbonChainSim'	Hydroxyl BAT Fit	0	96.1674				' C811OH'	hydroperoxideSOA (multifunctional hydroperoxide)	0.375	158.174
' OHcarbonChainSim'	Hydroxyl BAT Fit	0	152.278				' C812OOH'	hydroperoxideSOA (multifunctional hydroperoxide)	0.85714	195.19
' OHcarbonChainSim'	Hydroxyl BAT Fit	0	194.347				' C813OOH'	hydroperoxideSOA (multifunctional hydroperoxide)	0.75	206.156
' OHcarbonChainSim'	Hydroxyl BAT Fit	0	250.466				' C921OOH'	hydroperoxideSOA (multifunctional hydroperoxide)	0.55556	204.194
' OHcarbonChainSim'	Hydroxyl BAT Fit	0	292.563				' C57OOH'	hydroperoxideSOA (multifunctional hydroperoxide)	1	150.121
' OHcarbonChainSim'	Hydroxyl BAT Fit	0	348.674				' C58OOH'	hydroperoxideSOA (multifunctional hydroperoxide)	1	150.121
' OHcarbonChainSim'	Hydroxyl BAT Fit	0	404.763				' C59OOH'	hydroperoxideSOA (multifunctional hydroperoxide)	1	150.096
' OHcarbonChainSim'	Hydroxyl BAT Fit	0	446.825				' C510OOH'	hydroperoxideSOA (multifunctional hydroperoxide)	1.4	195.105
' OHcarbonChainSim'	Hydroxyl BAT Fit	0.07692	198.349				' C525OOH'	hydroperoxideSOA (multifunctional hydroperoxide)	1.2	166.107
' Tetracosanoic_acid'	Hydroxyl BAT Fit	0.08333	368.652				' HIEB1OOH'	hydroperoxideSOA (multifunctional hydroperoxide)	1.2	166.123
' Docosanoic_acid'	Hydroxyl BAT Fit	0.09091	340.567				' HIEB2OOH'	hydroperoxideSOA (multifunctional hydroperoxide)	1.2	166.123
' OHcarbonChainSim'	Hydroxyl BAT Fit	0.09091	340.567				' IEACO3H'	hydroperoxideSOA (multifunctional hydroperoxide)	1	148.097
' OHcarbonChainSim'	Hydroxyl BAT Fit	0.09375	496.856				' IEB1OOH'	hydroperoxideSOA (multifunctional hydroperoxide)	1	150.121
' OHcarbonChainSim'	Hydroxyl BAT Fit	0.1	156.267				' IEB2OOH'	hydroperoxideSOA (multifunctional hydroperoxide)	1	150.121
' OHcarbonChainSim'	Hydroxyl BAT Fit	0.10345	454.72				' IEC1OOH'	hydroperoxideSOA (multifunctional hydroperoxide)	1	150.096
' OHcarbonChainSim'	Hydroxyl BAT Fit	0.10526	298.525				' IEC2OOH'	hydroperoxideSOA (multifunctional hydroperoxide)	1	148.06
' Oleic_acid'	Hydroxyl BAT Fit	0.11111	282.427				' IECCO3H'	hydroperoxideSOA (multifunctional hydroperoxide)	1	148.121
Stearic_acid'	Hydroxyl BAT Fit	0.11111	284.478				' IEPOXA'	hydroperoxideSOA (multifunctional hydroperoxide)	0.6	118.138
' OHcarbonChainSim'	Hydroxyl BAT Fit	0.12	398.672				' IEPOXC'	hydroperoxideSOA (multifunctional hydroperoxide)	0.6	118.138
' OHcarbonChainSim'	Hydroxyl BAT Fit	0.125	256.419				' INAOOH'	hydroperoxideSOA (multifunctional hydroperoxide)	1.4	197.155
' Palmitic_acid'	Hydroxyl BAT Fit	0.125	256.419				' INB2OOH'	hydroperoxideSOA (multifunctional hydroperoxide)	1.4	197.155
2-Heptanone'	Hydroxyl BAT Fit	0.14286	114.141	added to improve generalizability, making functional group translations possible			' INCOOH'	hydroperoxideSOA (multifunctional hydroperoxide)	1.4	197.155
' 2-Ethoxy-2-methylpropane'	Hydroxyl BAT Fit	0.16667	102.178	added to improve generalizability, making functional group translations possible			' INDOOH'	hydroperoxideSOA (multifunctional hydroperoxide)	1.4	197.155
' Phenol'	Hydroxyl BAT Fit	0.16667	94.0931	added to improve generalizability, making functional group translations possible			' CarbonChainSim'	carboxyl	0.8	132.082
' 1-Hexanol'	Hydroxyl BAT Fit	0.16667	102.178				' CarbonChainSim'	carboxyl	0.25	144.197
' 1-Hexanol'	Hydroxyl BAT Fit	0.16667	102.178				' CarbonChainSim'	carboxyl	1	176.075
' OHcarbonChainSim'	Hydroxyl BAT Fit	0.16667	100.161				' CarbonChainSim'	carboxyl	0.18182	186.27
' OHcarbonChainSim'	Hydroxyl BAT Fit	0.17647	286.468				' CarbonChainSim'	carboxyl	0.16667	200.311
' OHcarbonChainSim'	Hydroxyl BAT Fit	0.18182	186.289				' CarbonChainSim'	carboxyl	0.4	202.222
' OHcarbonChainSim'	Hydroxyl BAT Fit	0.19231	444.73				' CarbonChainSim'	carboxyl	0.75	204.124
' PINAL'	Hydroxyl BAT Fit	0.2	168.17	added to improve generalizability, making functional group translations possible			' CarbonChainSim'	carboxyl	0.6	232.195
' 3-Pentanol'	Hydroxyl BAT Fit	0.2	88.1495				' CarbonChainSim'	carboxyl	0.125	256.419
' OHcarbonChainSim'	Hydroxyl BAT Fit	0.2	344.54				' CarbonChainSim'	carboxyl	0.57143	318.248
' OHcarbonChainSim'	Hydroxyl BAT Fit	0.21429	244.384				' CarbonChainSim'	carboxyl	0.76923	334.187
' OHcarbonChainSim'	Hydroxyl BAT Fit	0.21739	402.592				' CarbonChainSim'	carboxyl	1	350.165
' OHcarbonChainSim'	Hydroxyl BAT Fit	0.22222	158.243				' CarbonChainSim'	carboxyl	0.18182	370.547
' $tert$-Butanol'	Hydroxyl BAT Fit	0.25	74.1216				' CarbonChainSim'	ester	1	118.006
' 1-Butanol'	Hydroxyl BAT Fit	0.25	74.1216				' CarbonChainSim'	ester	0.8	132.034
' OHcarbonChainSim'	Hydroxyl BAT Fit	0.25	144.209				' CarbonChainSim'	ester	0.25	144.174
' OHcarbonChainSim'	Hydroxyl BAT Fit	0.27778	332.46				' CarbonChainSim'	ester	0.18182	186.25
' 1,7-Heptanediol'	Hydroxyl BAT Fit	0.28571	132.208				' CarbonChainSim'	ester	0.36364	216.201
' OHcarbonChainSim'	Hydroxyl BAT Fit	0.28571	390.548				' CarbonChainSim'	ester	0.14286	228.34
' OHcarbonChainSim'	Hydroxyl BAT Fit	0.29167	448.606				' CarbonChainSim'	ester	0.6	232.105
' OHcarbonChainSim'	Hydroxyl BAT Fit	0.3	188.275				' CarbonChainSim'	ester	1	234.004
' OHcarbonChainSim'	Hydroxyl BAT Fit	0.30769	246.356				' CarbonChainSim'	ester	0.8	262.051
' OHcarbonChainSim'	Hydroxyl BAT Fit	0.30769	492.644				' CarbonChainSim'	ester	0.11765	270.389
' OHcarbonChainSim'	Hydroxyl BAT Fit	0.3125	304.427				' CarbonChainSim'	ester	0.76923	334.063
Isobutyl_acetate'	Hydroxyl BAT Fit	0.33333	116.12	added to improve generalizability, making functional group translations possible			' CarbonChainSim'	ester	1	350.029
' 1-Propanol'	Hydroxyl BAT Fit	0.33333	60.0954				' CarbonChainSim'	ester	0.18182	370.471
' 2,5-Hexanediol'	Hydroxyl BAT Fit	0.33333	118.176				' CarbonChainSim'	ester	0.625	376.117
' Norpinonic_acid'	Hydroxyl BAT Fit	0.33333	170.139				' CarbonChainSim'	ester	0.08	382.587
' OHcarbonChainSim'	Hydroxyl BAT Fit	0.33333	58.0805				' CarbonChainSim'	ester	0.42105	388.276
' ALDOL_dimer'	Hydroxyl BAT Fit	0.36842	368.35	added to improve generalizability, making functional group translations possible			' CarbonChainSim'	ester	0.77778	464.091
' ESTER_dimer'	Hydroxyl BAT Fit	0.36842	368.35	added to improve generalizability, making functional group translations possible			' CarbonChainSim'	ester	1	466.011
' Mandelic_acid'	Hydroxyl BAT Fit	0.375	152.136				' CarbonChainSim'	ester	0.57143	476.236
' 2,4-Pentanediol'	Hydroxyl BAT Fit	0.4	104.151				' CarbonChainSim'	ester	0.2069	498.644
' OHcarbonChainSim'	Hydroxyl BAT Fit	0.4	102.132				' CarbonChainSim'	ester	0.05882	508.927
' OHcarbonChainSim'	Hydroxyl BAT Fit	0.4	204.263				' CarbonChainSim'	ether	0.6	120.051
' OHcarbonChainSim'	Hydroxyl BAT Fit	0.40909	452.55				' CarbonChainSim'	ether	0.8	135.073
' OHcarbonChainSim'	Hydroxyl BAT Fit	0.41176	350.438				' CarbonChainSim'	ether	0.11111	144.22
' OHcarbonChainSim'	Hydroxyl BAT Fit	0.41667	248.325				' CarbonChainSim'	ether	0.6	238.086
' OHcarbonChainSim'	Hydroxyl BAT Fit	0.42105	394.482				' CarbonChainSim'	ether	0.77778	240.117
' 2-Hydroxybenzoic_acid'	Hydroxyl BAT Fit	0.42857	138.085				' CarbonChainSim'	ether	1	242.183
' OHcarbonChainSim'	Hydroxyl BAT Fit	0.42857	146.186				' CarbonChainSim'	ether	0.21429	246.288
' OHcarbonChainSim'	Hydroxyl BAT Fit	0.42857	292.373				' CarbonChainSim'	ether	0.41667	250.153
' OHcarbonChainSim'	Hydroxyl BAT Fit	0.44444	190.243				' CarbonChainSim'	ether	0.05882	256.419
Pinic_acid'	Hydroxyl BAT Fit	0.44444	186.173				' CarbonChainSim'	ether	0.6	356.118
' 1,2,7,8-Octanetetrol'	Hydroxyl BAT Fit	0.5	178.235				' CarbonChainSim'	ether	1	362.276
' OHcarbonChainSim'	Hydroxyl BAT Fit	0.5	88.1064				' CarbonChainSim'	ether	0.38889	366.253
' OHcarbonChainSim'	Hydroxyl BAT Fit	0.5	352.426				' CarbonChainSim'	ether	0.78571	374.164
' OHcarbonChainSim'	Hydroxyl BAT Fit	0.5	396.479				' CarbonChainSim'	ether	0.18182	374.475
' OHcarbonChainSim'	Hydroxyl BAT Fit	0.5	440.489				' CarbonChainSim'	ether	0.03846	382.668
' OHcarbonChainSim'	Hydroxyl BAT Fit	0.5	484.562				' CarbonChainSim'	ether	1	482.356
' OHcarbonChainSim'	Hydroxyl BAT Fit	0.53846	294.331				' CarbonChainSim'	ether	0.2069	504.65
' OHcarbonChainSim'	Hydroxyl BAT Fit	0.54545	250.292				' CarbonChainSim'	ether	0.02857	508.927
' OHcarbonChainSim'	Hydroxyl BAT Fit	0.57143	486.524				' CarbonChainSim'	hydroperoxide	1.33333	107.091
' OHcarbonChainSim'	Hydroxyl BAT Fit	0.57895	442.545				' CarbonChainSim'	hydroperoxide	1	122.126
' OHcarbonChainSim'	Hydroxyl BAT Fit	0.58333	280.317				' CarbonChainSim'	hydroperoxide	0.8	136.155
' OHcarbonChainSim'	Hydroxyl BAT Fit	0.58824	398.496				' CarbonChainSim'	hydroperoxide	0.22222	160.256
' OHcarbonChainSim'	Hydroxyl BAT Fit	0.6	236.275				' CarbonChainSim'	hydroperoxide	1.2	168.154
' OHcarbonChainSim'	Hydroxyl BAT Fit	0.625	192.212				' CarbonChainSim'	hydroperoxide	0.16667	202.336
' OHcarbonChainSim'	Hydroxyl BAT Fit	0.64286	340.374				' CarbonChainSim'	hydroperoxide	0.6	238.275
' 1,3-Propanediol'	Hydroxyl BAT Fit	0.66667	76.0971				' CarbonChainSim'	hydroperoxide	1	242.248
' Adipic_acid'	Hydroxyl BAT Fit	0.66667	146.115				' CarbonChainSim'	hydroperoxide	0.8	270.267
' OHcarbonChainSim'	Hydroxyl BAT Fit	0.66667	148.158				' CarbonChainSim'	hydroperoxide	1.25	274.216
' OHcarbonChainSim'	Hydroxyl BAT Fit	0.66667	296.316				' CarbonChainSim'	hydroperoxide	0.25	290.44
' 2-Methyltetrol_dimer'	Hydroxyl BAT Fit	0.7	254.284				' CarbonChainSim'	hydroperoxide	0.42857	294.379
' OHcarbonChainSim'	Hydroxyl BAT Fit	0.7	252.254				' CarbonChainSim'	hydroperoxide	0.10526	300.517
' OHcarbonChainSim'	Hydroxyl BAT Fit	0.70588	430.49				' CarbonChainSim'	hydroperoxide	1.16667	394.309
' OHcarbonChainSim'	Hydroxyl BAT Fit	0.73333	386.444				' CarbonChainSim'	hydroperoxide	0.58824	400.445
' OHcarbonChainSim'	Hydroxyl BAT Fit	0.75	104.109				' CarbonChainSim'	hydroperoxide	0.8	404.4
' OHcarbonChainSim'	Hydroxyl BAT Fit	0.76923	342.379				' CarbonChainSim'	hydroperoxide	0.4	410.574
' OHcarbonChainSim'	Hydroxyl BAT Fit	0.77778	238.244				' CarbonChainSim'	hydroperoxide	0.16	416.651
' OHcarbonChainSim'	Hydroxyl BAT Fit	0.77778	476.488				' CarbonChainSim'	ketone	0.14286	114.141
' 2-Methyltetrol'	Hydroxyl BAT Fit	0.8	136.155				' CarbonChainSim'	ketone	0.28571	128.082
' Glutaric_acid'	Hydroxyl BAT Fit	0.8	132.082				' CarbonChainSim'	ketone	0.42857	142.026
' OHcarbonChainSim'	Hydroxyl BAT Fit	0.8	134.137				' CarbonChainSim'	ketone	0.09091	170.251
' OHcarbonChainSim'	Hydroxyl BAT Fit	0.8125	432.453				' CarbonChainSim'	ketone	0.28571	254.14
' OHcarbonChainSim'	Hydroxyl BAT Fit	0.81818	298.278				' CarbonChainSim'	ketone	0.125	254.32
' OHcarbonChainSim'	Hydroxyl BAT Fit	0.85714	194.18				' CarbonChainSim'	ketone	0.5	257.998
' OHcarbonChainSim'	Hydroxyl BAT Fit	0.85714	388.36				' CarbonChainSim'	ketone	0.46154	271.04
' OHcarbonChainSim'	Hydroxyl BAT Fit	0.88235	478.513				' CarbonChainSim'	ketone	0.05263	282.471
' OHcarbonChainSim'	Hydroxyl BAT Fit	0.88889	254.248				' CarbonChainSim'	ketone	0.45	413.022
' OHcarbonChainSim'	Hydroxyl BAT Fit	0.9	284.254				' CarbonChainSim'	ketone	0.30435	422.217
' OHcarbonChainSim'	Hydroxyl BAT Fit	0.91667	344.343				' CarbonChainSim'	ketone	0.15385	422.514
' OHcarbonChainSim'	Hydroxyl BAT Fit	0.93333	434.435				' CarbonChainSim'	ketone	0.5	429.976
' Glycerol'	Hydroxyl BAT Fit	1	92.0969				' CarbonChainSim'	ketone	0.03333	436.752
' OHcarbonChainSim'	Hydroxyl BAT Fit	1	62.0706				' PEG-200-n3'	PEG	0.625	194.243
' OHcarbonChainSim'	Hydroxyl BAT Fit	1	92.0969				' PEG-400-n8'	PEG	0.55556	414.542
' OHcarbonChainSim'	Hydroxyl BAT Fit	1	152.149				' PEG-1000-n21'	PEG	0.52273	987.178
' OHcarbonChainSim'	Hydroxyl BAT Fit	1	182.182
' OHcarbonChainSim'	Hydroxyl BAT Fit	1	302.282
' OHcarbonChainSim'	Hydroxyl BAT Fit	1	332.337
' OHcarbonChainSim'	Hydroxyl BAT Fit	1	392.334
' OHcarbonChainSim'	Hydroxyl BAT Fit	1	452.436
' OHcarbonChainSim'	Hydroxyl BAT Fit	1	482.485
' OHcarbonChainSim'	Hydroxyl BAT Fit	1.07143	438.345
' OHcarbonChainSim'	Hydroxyl BAT Fit	1.08333	378.328
' OHcarbonChainSim'	Hydroxyl BAT Fit	1.09091	348.337
' OHcarbonChainSim'	Hydroxyl BAT Fit	1.11111	288.256
' OHcarbonChainSim'	Hydroxyl BAT Fit	1.13333	484.431
' Citric_acid'	Hydroxyl BAT Fit	1.16667	192.068
' OHcarbonChainSim'	Hydroxyl BAT Fit	1.16667	198.174
' OHcarbonChainSim'	Hydroxyl BAT Fit	1.16667	394.309
' OHcarbonChainSim'	Hydroxyl BAT Fit	1.2	334.311
' OHcarbonChainSim'	Hydroxyl BAT Fit	1.23077	440.381
' OHcarbonChainSim'	Hydroxyl BAT Fit	1.25	138.128
' OHcarbonChainSim'	Hydroxyl BAT Fit	1.27273	380.325
' OHcarbonChainSim'	Hydroxyl BAT Fit	1.28571	244.219
' OHcarbonChainSim'	Hydroxyl BAT Fit	1.3	350.301
' Malonic_acid'	Hydroxyl BAT Fit	1.33333	104.03
' OHcarbonChainSim'	Hydroxyl BAT Fit	1.33333	108.1
' OHcarbonChainSim'	Hydroxyl BAT Fit	1.33333	426.313
' OHcarbonChainSim'	Hydroxyl BAT Fit	1.36364	396.304
' OHcarbonChainSim'	Hydroxyl BAT Fit	1.375	290.253
' OHcarbonChainSim'	Hydroxyl BAT Fit	1.4	184.156
' OHcarbonChainSim'	Hydroxyl BAT Fit	1.41667	442.328
' OHcarbonChainSim'	Hydroxyl BAT Fit	1.44444	336.245
' OHcarbonChainSim'	Hydroxyl BAT Fit	1.5	154.128
' OHcarbonChainSim'	Hydroxyl BAT Fit	1.5	230.178
' OHcarbonChainSim'	Hydroxyl BAT Fit	1.5	382.262
' OHcarbonChainSim'	Hydroxyl BAT Fit	1.54545	428.34
' OHcarbonChainSim'	Hydroxyl BAT Fit	1.58333	474.355
' OHcarbonChainSim'	Hydroxyl BAT Fit	1.6	200.156
' OHcarbonChainSim'	Hydroxyl BAT Fit	1.6	398.32
' OHcarbonChainSim'	Hydroxyl BAT Fit	1.66667	246.187
' OHcarbonChainSim'	Hydroxyl BAT Fit	1.71429	292.23
' OHcarbonChainSim'	Hydroxyl BAT Fit	1.75	338.265
' OHcarbonChainSim'	Hydroxyl BAT Fit	1.77778	384.3
' OHcarbonChainSim'	Hydroxyl BAT Fit	1.8	430.284
' OHcarbonChainSim'	Hydroxyl BAT Fit	1.81818	476.362
' OHcarbonChainSim'	Hydroxyl BAT Fit	2	94.0734
' OHcarbonChainSim'	Hydroxyl BAT Fit	2	140.104
' OHcarbonChainSim'	Hydroxyl BAT Fit	2	186.135
' OHcarbonChainSim'	Hydroxyl BAT Fit	2	232.165
' OHcarbonChainSim'	Hydroxyl BAT Fit	2	278.196
' Oxalic_acid'	Hydroxyl BAT Fit	2	90.0035

## Sheet: SOA systems
alpha-Pinene SOA				Molecule translated to OH equivalent			Molecule translated to OH equivalent				Isoprene SOA				Molecule translated to OH equivalent			Molecule translated to OH equivalent			C_star (ug/m3) and C_total (ug/m3) from the AIOMFAC equil. Calculation at 0% RH
Chemical Name (MCM)	SMILES	BAT funcitonal group	O:C	O:C [OH eqv.]	H:C	M (g/mol)	M (g/mol) [OH eqv.]	C_total (ug/m3)	effective C_sat_dry (ug/m3)		Chemical Name (MCM)	SMILES	BAT funcitonal group	O:C	O:C [OH eqv.]	H:C	M (g/mol)	M (g/mol) [OH eqv.]	C_total (ug/m3)	effective C_sat_dry (ug/m3)
C107OOH	O=CCC1CC(OO)(C(=O)C)C1(C)C	'hydroperoxideSOA'	0.4	0.214018	1.6	200.166	164.225	8.79183	5742.87		IEB1OOH	OCC(O)C(C)(OO)C=O	'hydroperoxideSOA'	1	0.535066	2	150.112	117.513	3.2124	50.688
C97OOH	OCC1CC(OO)(C(=O)C)C1(C)C	'hydroperoxideSOA'	0.444444	0.237798	1.77778	188.174	152.783	3.98405	327.408		IEB2OOH	OOC(C=O)C(C)(O)CO	'hydroperoxideSOA'	1	0.535066	2.4	150.112	117.513	0.249186	231.8
C108OOH	O=CCC(CC(=O)C(=O)C)C(C)(C)OO	'hydroperoxideSOA'	0.5	0.267524	1.6	216.13	179.672	1.13437	166.714		C59OOH	OCC(=O)C(C)(CO)OO	'hydroperoxideSOA'	1	0.535066	2	150.094	117.497	4.21764	22.9541
PINIC	OC(=O)CC1CC(C(=O)C)C1(C)C	'carboxyl'	0.444444	0.444444	1.55556	186.166	186.166	0.628147	14.9529		IEC1OOH	OCC(=O)C(C)(CO)OO	'hydroperoxideSOA'	1	0.535066	2	150.094	117.497	1.47092	22.9541
C921OOH	OCC(=O)C1(OO)CC(CO)C1(C)C	'hydroperoxideSOA'	0.555556	0.29725	1.77778	204.182	168.088	0.91858	2.12802		C58OOH	O=CC(O)C(C)(CO)OO	'hydroperoxideSOA'	1	0.535066	2	150.112	117.513	0.33475	50.688
C812OOH	OCC1CC(OO)(C(=O)O)C1(C)C	'hydroperoxideSOA'	0.857143	0.458623	1.75	195.172	159.442	0.766355	0.719114		IEPOXA	CC(O)(CO)C1CO1	'hydroxyl'	0.6	0.6	2	118.131	118.131	8.63536e-11	3.51201e+13
C811OH	OCC1CC(C(=O)O)C1(C)C	'hydroperoxideSOA'	0.375	0.200641	1.75	158.174	124.84	0.39949	1156.87		C57OOH	OCC(O)C(C)(OO)C=O	'hydroperoxideSOA'	1	0.535066	2	150.112	117.513	0.271703	50.688
C813OOH	OCC(CC(=O)C(=O)O)C(C)(C)OO	'hydroperoxideSOA'	0.75	0.401293	1.75	206.138	169.976	0.313187	0.0301799		IEPOXC	CC1(CO1)C(O)CO	'hydroxyl'	0.6	0.6	2	118.131	118.131	2.78789e-09	52036.1
ALDOL_dimer_C19H28O7	CC(=O)C(=O)CC(C(C=O)=CCC1CC(C(O)=O)C1(C)C)C(C)(C)OO	'hydroperoxideSOA'	0.368421	0.197121	1.47368	368.298	335.213	4.06961	2.78659e-06		HIEB1OOH	OCC(O)C(CO)(OO)C=O	'hydroperoxideSOA'	1.2	0.642088	2	166.112	132.133	0.289035	0.103698
ESTER_dimer	CC1(C)C(CC1C(O)=O)CC(=O)OCC(=O)C2CC(CC(O)=O)C2(C)C	'ester'	0.368421	0.122902	1.55556	368.306	289.504	1.01741	3.63695e-06		INDOOH	OCC(ON(=O)=O)C(C)(CO)OO	'hydroperoxideSOA'	1.4	0.749113	2.2	197.138	161.322	0.250365	0.451167
											IEACO3H	CC(O)(C1CO1)C(=O)OO	'hydroperoxideSOA'	1	0.535066	1.6	148.096	115.694	5.34627e-08	56320.8
											C525OOH	OCC(=O)C(CO)(CO)OO	'hydroperoxideSOA'	1.2	0.642088	2	166.094	132.116	0.215922	0.0398376
											HIEB2OOH	OOC(C=O)C(O)(CO)CO	'hydroperoxideSOA'	1.2	0.642088	2	166.112	132.133	0.142026	0.704845
											IEC2OOH	OCC(=O)C(C)(OO)C=O	'hydroperoxideSOA'	1	0.535066	1.6	148.06	115.662	2.08765e-06	4294.37
											INAOOH	OCC(C)(OO)C(O)CON(=O)=O	'hydroperoxideSOA'	1.4	0.749113	2.2	197.138	161.322	0.138982	1.73509
											C510OOH	O=CC(O)C(C)(OO)CON(=O)=O	'hydroperoxideSOA'	1.4	0.749113	1.8	195.104	159.377	0.00417523	269.901
											INB1OOH	OCC(OO)C(C)(CO)ON(=O)=O	'hydroperoxideSOA'	1.4	0.749113	2.2	197.138	161.322	0.0715611	0.42126
											IECCO3H	CC1(CO1)C(O)C(=O)OO	'hydroperoxideSOA'	1	0.535066	1.6	148.115	115.711	7.59829e-07	18032.8
											INCOOH	OCC(OO)C(C)(O)CON(=O)=O	'hydroperoxideSOA'	1.4	0.749113	2.2	197.138	161.322	0.0307535	7.31407
											INB2OOH	OOCC(O)C(C)(CO)ON(=O)=O	'hydroperoxideSOA'	1.4	0.749113	2.2	197.138	161.322	0.0348934	1.46515
											2-Methyltetrol_dimer	CC(O)(CO)C(O)COC(C)(CO)C(O)CO	'hydroxyl'	0.7	0.7	2.3	254.277	254.277	7.22146	2.57876e-06

## Sheet: Fig2
plot a				data				plot b	Citric acid						plot c	Citric acid
molar mass	low O:C line	miscibility line		Chemical name	Molar mass (g/mol)	O:C		water mole fraction BAT	BAT a_w	BAT a_org	water mole fraction AIOMFAC	AIOMFAC a_w	AIOMFAC a_org		water mole fraction BAT	BAT a_w	BAT a_org	water mole fraction AIOMFAC	AIOMFAC a_w	AIOMFAC a_org
45	0.0460763	0.230382		' Oxalic_acid'	90.0035	2		0	0	1	0.000368231	0.000115213	0.999632		0	0	1	0.000195915	0.00115286	0.999804
46	0.0460927	0.230464		' Malonic_acid'	104.03	1.33333		0.0001	3.87406e-05	0.9999	0.00119834	0.00037525	0.998801		0.0001	0.00044525	0.9999	0.000637817	0.00374812	0.999363
47	0.0461118	0.230559		' Glutaric_acid'	132.082	0.8		0.0002	7.74837e-05	0.9998	0.00389249	0.00122218	0.9961		0.0002	0.000890474	0.9998	0.0020744	0.0121366	0.997933
48	0.0461337	0.230668		' Adipic_acid'	146.115	0.66667		0.0003	0.000116229	0.9997	0.0125675	0.00398042	0.987354		0.0003	0.00133567	0.9997	0.00672486	0.038794	0.993344
49	0.0461587	0.230793		' Citric_acid'	192.068	1.16667		0.0004	0.000154977	0.9996	0.0398036	0.0129596	0.959404		0.0004	0.00178084	0.9996	0.0215755	0.119168	0.979101
50	0.0461871	0.230935		' Glycerol'	92.0969	1		0.0005	0.000193728	0.9995	0.118955	0.0420933	0.873941		0.0005	0.00222598	0.9995	0.0670089	0.328215	0.938801
51	0.0462191	0.231096		' $tert$-Butanol'	74.1216	0.25		0.0006	0.00023248	0.9994	0.153532	0.0564247	0.834636		0.0006	0.0026711	0.9994	0.0879949	0.410009	0.921539
52	0.0462551	0.231275		' 1-Hexanol'	102.178	0.16667		0.0007	0.000271236	0.9993	0.195925	0.0755217	0.784855		0.0007	0.00311619	0.9993	0.114745	0.503781	0.900524
53	0.0462952	0.231476		' 2,5-Hexanediol'	118.176	0.33333		0.0008	0.000309994	0.9992	0.246613	0.10083	0.723138		0.0008	0.00356125	0.9992	0.148305	0.607721	0.875474
54	0.0463398	0.231699		' 2-Hydroxybenzoic_acid'	138.085	0.42857		0.0009	0.000348754	0.9991	0.305434	0.134079	0.648803		0.0009	0.00400628	0.9991	0.189578	0.718657	0.846327
55	0.0463892	0.231946		' Hexacosane'	366.701	0		0.001	0.000387517	0.999	0.371368	0.177163	0.562667		0.001	0.00445129	0.999	0.239112	0.832043	0.813369
56	0.0464435	0.232217		' Nonadecane'	268.535	0		0.0011	0.000426282	0.9989	0.442469	0.231855	0.46778		0.0011	0.00489627	0.9989	0.296848	0.942037	0.777437
57	0.046503	0.232515		' 1,3-Propanediol'	76.0971	0.66667		0.0012	0.00046505	0.9988	0.516008	0.299241	0.369751		0.0012	0.00534122	0.9988	0.361895	1.04176	0.740171
58	0.0465679	0.23284		' 1,2,7,8-Octanetetrol'	178.235	0.5		0.0013	0.00050382	0.9987	0.588861	0.378933	0.276073		0.0013	0.00578615	0.9987	0.43243	1.12397	0.704279
59	0.0466386	0.233193		' 2-Methyltetrol'	136.155	0.8		0.0014	0.000542592	0.9986	0.658015	0.468288	0.194224		0.0014	0.00623105	0.9986	0.505814	1.18242	0.673709
60	0.0467151	0.233576		' PINIC'	186.173	0.44444		0.0015	0.000581367	0.9985	0.721048	0.562166	0.129251		0.0015	0.00667592	0.9985	0.578949	1.2135	0.653668
61	0.0467978	0.233989		' 2,4-Pentanediol'	104.151	0.4		0.0016	0.000620145	0.9984	0.77641	0.653741	0.0822999		0.0016	0.00712076	0.9984	0.648776	1.21769	0.650609
62	0.0468868	0.234434		' ESTER_dimer'	368.35	0.36842		0.0017	0.000658925	0.9983	0.823475	0.736331	0.0510544		0.0017	0.00756558	0.9983	0.712769	1.19961	0.672426
63	0.0469823	0.234912		' ALDOL_dimer'	368.35	0.36842		0.0018	0.000697708	0.998199	0.862389	0.80535	0.0315108		0.0018	0.00801037	0.9982	0.769248	1.16679	0.728985
64	0.0470844	0.235422		' Oleic_acid'	282.427	0.11111		0.0019	0.000736493	0.998099	0.89383	0.859277	0.019723		0.0019	0.00845513	0.998101	0.817466	1.12752	0.832738
65	0.0471934	0.235967		' Tetracosanoic_acid'	368.652	0.08333		0.002	0.00077528	0.997999	0.918765	0.899258	0.0126846		0.002	0.00889986	0.998001	0.857475	1.08888	0.998376
66	0.0473093	0.236546		' 2-Methyltetrol_dimer'	254.284	0.7		0.0021	0.00081407	0.997899	0.938248	0.927901	0.00842895		0.0021	0.00934457	0.997901	0.889896	1.05558	1.23966
67	0.0474322	0.237161		' 1,7-Heptanediol'	132.208	0.28571		0.0022	0.000852863	0.997799	0.953296	0.948094	0.00578139		0.0022	0.00978925	0.997801	0.915667	1.0298	1.5616
68	0.0475622	0.237811		' 1-Butanol'	74.1216	0.25		0.0023	0.000891658	0.997699	0.964814	0.962315	0.00407255		0.0023	0.0102339	0.997701	0.935841	1.01172	1.94877
69	0.0476995	0.238497		' 1-Hexanol'	102.178	0.16667		0.0024	0.000930455	0.997599	0.973571	0.972415	0.00292726		0.0024	0.0106785	0.997601	0.951445	1.00031	2.35661
70	0.047844	0.23922		' 1-Propanol'	60.0954	0.33333		0.0025	0.000969255	0.997499	0.980193	0.979675	0.00213382		0.0025	0.0111231	0.997501	0.963403	0.994001	2.71602
71	0.0479959	0.239979		' 2-Ethoxy-2-methylpropane'	102.178	0.16667		0.0026	0.00100806	0.997399	0.985181	0.984955	0.00156973		0.0026	0.0115677	0.997401	0.9725	0.9912	2.95504
72	0.048155	0.240775		' 2-Heptanone'	114.141	0.14286		0.0027	0.00104686	0.997299	0.988927	0.988831	0.00116125		0.0027	0.0120122	0.997301	0.979385	0.99058	3.02703
73	0.0483215	0.241608		' 3-Pentanol'	88.1495	0.2		0.0028	0.00108567	0.997199	0.991734	0.991694	0.000861872		0.0028	0.0124567	0.997201	0.984573	0.991163	2.92688
74	0.0484953	0.242477		' Docosanoic_acid'	340.567	0.09091		0.0029	0.00112448	0.997099	0.993834	0.993818	0.000640824		0.0029	0.0129012	0.997101	0.988471	0.992298	2.68704
75	0.0486764	0.243382		' Isobutyl_acetate'	116.12	0.33333		0.003	0.00116329	0.996999	0.995403	0.995397	0.000476899		0.003	0.0133457	0.997001	0.991393	0.993591	2.35965
76	0.0488646	0.244323		' Mandelic_acid'	152.136	0.375		0.0031	0.00120211	0.996898	0.996574	0.996572	0.000355062		0.0031	0.0137901	0.996901	0.993579	0.99483	1.99734
77	0.04906	0.2453		' Norpinonic_acid'	170.139	0.33333		0.0032	0.00124092	0.996798	0.997448	0.997447	0.000264398		0.0032	0.0142345	0.996802	0.995212	0.99592	1.64126
78	0.0492624	0.246312		' Palmitic_acid'	256.419	0.125		0.0033	0.00127975	0.996698	0.998099	0.998098	0.000196893		0.0033	0.0146789	0.996702	0.996432	0.99683	1.31748
79	0.0494717	0.247358		' Phenol'	94.0931	0.16667		0.0034	0.00131857	0.996598	0.998584	0.998584	0.000146618		0.0034	0.0151233	0.996602	0.997341	0.997565	1.03845
80	0.0496877	0.248439		' PINAL'	168.17	0.2		0.0035	0.00135739	0.996498	0.998946	0.998946	0.000109171		0.0035	0.0155676	0.996502	0.99802	0.998144	0.807139
81	0.0499104	0.249552		' Stearic_acid'	284.478	0.11111		0.0036	0.00139622	0.996398	0.999676	0.999676	3.35463e-05		0.0036	0.0160119	0.996402	0.999391	0.999403	0.270805
82	0.0501395	0.250698		' OHcarbonChainSim'	54.0907	0		0.0037	0.00143505	0.996298	0.9999	0.9999	1.03023e-05		0.0037	0.0164561	0.996302	0.999813	0.999814	0.0854814
83	0.050375	0.251875		' OHcarbonChainSim'	58.0805	0.33333		0.0038	0.00147388	0.996198	0.999969	0.999969	3.15803e-06		0.0038	0.0169004	0.996202	0.999943	0.999943	0.0264605
84	0.0506165	0.253082		' OHcarbonChainSim'	62.0706	1		0.0039	0.00151272	0.996098	0.999991	0.999991	9.73299e-07		0.0039	0.0173446	0.996102	0.999982	0.999982	0.00813436
85	0.0508639	0.254319		' OHcarbonChainSim'	88.1064	0.5		0.004	0.00155156	0.995997					0.004	0.0177888	0.996002
86	0.0511169	0.255585		' OHcarbonChainSim'	92.0969	1		0.0041	0.0015904	0.995897					0.0041	0.0182329	0.995903
87	0.0513754	0.256877		' OHcarbonChainSim'	94.0734	2		0.0042	0.00162924	0.995797					0.0042	0.018677	0.995803
88	0.0516391	0.258195		' OHcarbonChainSim'	96.1674	0		0.0043	0.00166808	0.995697					0.0043	0.0191211	0.995703
89	0.0519077	0.259539		' OHcarbonChainSim'	100.161	0.16667		0.0044	0.00170693	0.995597					0.0044	0.0195652	0.995603
90	0.052181	0.260905		' OHcarbonChainSim'	102.132	0.4		0.0045	0.00174578	0.995497					0.0045	0.0200092	0.995503
91	0.0524588	0.262294		' OHcarbonChainSim'	104.109	0.75		0.0046	0.00178464	0.995397					0.0046	0.0204532	0.995403
92	0.0527407	0.263704		' OHcarbonChainSim'	108.1	1.33333		0.0047	0.00182349	0.995296					0.0047	0.0208972	0.995303
93	0.0530266	0.265133		' OHcarbonChainSim'	134.137	0.8		0.0048	0.00186235	0.995196					0.0048	0.0213412	0.995204
94	0.053316	0.26658		' OHcarbonChainSim'	138.128	1.25		0.0049	0.00190121	0.995096					0.0049	0.0217851	0.995104
95	0.0536088	0.268044		' OHcarbonChainSim'	140.104	2		0.005	0.00194007	0.994996					0.005	0.022229	0.995004
96	0.0539047	0.269524		' OHcarbonChainSim'	144.209	0.25		0.0051	0.00197894	0.994896					0.0051	0.0226729	0.994904
97	0.0542034	0.271017		' OHcarbonChainSim'	146.186	0.42857		0.0052	0.00201781	0.994796					0.0052	0.0231167	0.994804
98	0.0545046	0.272523		' OHcarbonChainSim'	148.158	0.66667		0.0053	0.00205668	0.994695					0.0053	0.0235605	0.994704
99	0.054808	0.27404		' OHcarbonChainSim'	152.149	1		0.0054	0.00209555	0.994595					0.0054	0.0240043	0.994605
100	0.0551134	0.275567		' OHcarbonChainSim'	152.278	0		0.0055	0.00213443	0.994495					0.0055	0.0244481	0.994505
101	0.0554206	0.277103		' OHcarbonChainSim'	154.128	1.5		0.0056	0.0021733	0.994395					0.0056	0.0248918	0.994405
102	0.0557291	0.278646		' OHcarbonChainSim'	156.267	0.1		0.0057	0.00221219	0.994295					0.0057	0.0253355	0.994305
103	0.0560388	0.280194		' OHcarbonChainSim'	158.243	0.22222		0.0058	0.00225107	0.994195					0.0058	0.0257792	0.994205
104	0.0563495	0.281748		' OHcarbonChainSim'	182.182	1		0.0059	0.00228995	0.994094					0.0059	0.0262228	0.994105
105	0.0566608	0.283304		' OHcarbonChainSim'	184.156	1.4		0.006	0.00232884	0.993994					0.006	0.0266664	0.994006
106	0.0569726	0.284863		' OHcarbonChainSim'	186.135	2		0.0061	0.00236773	0.993894					0.0061	0.02711	0.993906
107	0.0572846	0.286423		' OHcarbonChainSim'	186.289	0.18182		0.0062	0.00240663	0.993794					0.0062	0.0275536	0.993806
108	0.0575965	0.287982		' OHcarbonChainSim'	188.275	0.3		0.0063	0.00244552	0.993694					0.0063	0.0279971	0.993706
109	0.0579082	0.289541		' OHcarbonChainSim'	190.243	0.44444		0.0064	0.00248442	0.993593					0.0064	0.0284406	0.993606
110	0.0582194	0.291097		' OHcarbonChainSim'	192.212	0.625		0.0065	0.00252333	0.993493					0.0065	0.0288841	0.993507
111	0.0585299	0.29265		' OHcarbonChainSim'	194.18	0.85714		0.0066	0.00256223	0.993393					0.0066	0.0293275	0.993407
112	0.0588396	0.294198		' OHcarbonChainSim'	194.347	0		0.0067	0.00260114	0.993293					0.0067	0.0297709	0.993307
113	0.0591482	0.295741		' OHcarbonChainSim'	198.174	1.16667		0.0068	0.00264005	0.993193					0.0068	0.0302143	0.993207
114	0.0594556	0.297278		' OHcarbonChainSim'	198.349	0.07692		0.0069	0.00267896	0.993092					0.0069	0.0306576	0.993107
115	0.0597616	0.298808		' OHcarbonChainSim'	200.156	1.6		0.007	0.00271787	0.992992					0.007	0.031101	0.993008
116	0.060066	0.30033		' OHcarbonChainSim'	204.263	0.4		0.0071	0.00275679	0.992892					0.0071	0.0315443	0.992908
117	0.0603687	0.301843		' OHcarbonChainSim'	230.178	1.5		0.0072	0.00279571	0.992792					0.0072	0.0319875	0.992808
118	0.0606695	0.303347		' OHcarbonChainSim'	232.165	2		0.0073	0.00283463	0.992691					0.0073	0.0324308	0.992708
119	0.0609683	0.304842		' OHcarbonChainSim'	236.275	0.6		0.0074	0.00287356	0.992591					0.0074	0.032874	0.992609
120	0.061265	0.306325		' OHcarbonChainSim'	238.244	0.77778		0.0075	0.00291248	0.992491					0.0075	0.0333172	0.992509
121	0.0615595	0.307797		' OHcarbonChainSim'	244.219	1.28571		0.0076	0.00295141	0.992391					0.0076	0.0337603	0.992409
122	0.0618515	0.309258		' OHcarbonChainSim'	244.384	0.21429		0.0077	0.00299035	0.99229					0.0077	0.0342034	0.992309
123	0.0621412	0.310706		' OHcarbonChainSim'	246.187	1.66667		0.0078	0.00302928	0.99219					0.0078	0.0346465	0.99221
124	0.0624282	0.312141		' OHcarbonChainSim'	246.356	0.30769		0.0079	0.00306822	0.99209					0.0079	0.0350896	0.99211
125	0.0627126	0.313563		' OHcarbonChainSim'	248.325	0.41667		0.008	0.00310716	0.99199					0.008	0.0355326	0.99201
126	0.0629943	0.314972		' OHcarbonChainSim'	250.292	0.54545		0.0081	0.0031461	0.991889					0.0081	0.0359756	0.99191
127	0.0632732	0.316366		' OHcarbonChainSim'	250.466	0		0.0082	0.00318505	0.991789					0.0082	0.0364186	0.991811
128	0.0635492	0.317746		' OHcarbonChainSim'	252.254	0.7		0.0083	0.003224	0.991689					0.0083	0.0368616	0.991711
129	0.0638223	0.319112		' OHcarbonChainSim'	254.248	0.88889		0.0084	0.00326295	0.991589					0.0084	0.0373045	0.991611
130	0.0640924	0.320462		' OHcarbonChainSim'	256.419	0.125		0.0085	0.0033019	0.991488					0.0085	0.0377474	0.991511
131	0.0643595	0.321798		' OHcarbonChainSim'	278.196	2		0.0086	0.00334086	0.991388					0.0086	0.0381902	0.991412
132	0.0646235	0.323118		' OHcarbonChainSim'	280.317	0.58333		0.0087	0.00337982	0.991288					0.0087	0.0386331	0.991312
133	0.0648844	0.324422		' OHcarbonChainSim'	284.254	0.9		0.0088	0.00341878	0.991187					0.0088	0.0390759	0.991212
134	0.0651422	0.325711		' OHcarbonChainSim'	286.468	0.17647		0.0089	0.00345774	0.991087					0.0089	0.0395186	0.991112
135	0.0653968	0.326984		' OHcarbonChainSim'	288.256	1.11111		0.009	0.00349671	0.990987					0.009	0.0399614	0.991013
136	0.0656482	0.328241		' OHcarbonChainSim'	290.253	1.375		0.0091	0.00353568	0.990887					0.0091	0.0404041	0.990913
137	0.0658964	0.329482		' OHcarbonChainSim'	292.23	1.71429		0.0092	0.00357465	0.990786					0.0092	0.0408468	0.990813
138	0.0661414	0.330707		' OHcarbonChainSim'	292.373	0.42857		0.0093	0.00361362	0.990686					0.0093	0.0412894	0.990714
139	0.0663831	0.331916		' OHcarbonChainSim'	292.563	0		0.0094	0.0036526	0.990586					0.0094	0.041732	0.990614
140	0.0666217	0.333108		' OHcarbonChainSim'	294.331	0.53846		0.0095	0.00369158	0.990485					0.0095	0.0421746	0.990514
141	0.066857	0.334285		' OHcarbonChainSim'	296.316	0.66667		0.0096	0.00373056	0.990385					0.0096	0.0426172	0.990415
142	0.0670891	0.335445		' OHcarbonChainSim'	298.278	0.81818		0.0097	0.00376955	0.990285					0.0097	0.0430597	0.990315
143	0.067318	0.33659		' OHcarbonChainSim'	298.525	0.10526		0.0098	0.00380854	0.990184					0.0098	0.0435022	0.990215
144	0.0675436	0.337718		' OHcarbonChainSim'	302.282	1		0.0099	0.00384753	0.990084					0.0099	0.0439447	0.990115
145	0.0677661	0.338831		' OHcarbonChainSim'	304.427	0.3125		0.01	0.00388652	0.989984					0.01	0.0443871	0.990016
146	0.0679854	0.339927		' OHcarbonChainSim'	332.337	1		0.0101	0.00392552	0.989883					0.0101	0.0448296	0.989916
147	0.0682015	0.341008		' OHcarbonChainSim'	332.46	0.27778		0.0102	0.00396452	0.989783					0.0102	0.0452719	0.989816
148	0.0684145	0.342073		' OHcarbonChainSim'	334.311	1.2		0.0103	0.00400352	0.989683					0.0103	0.0457143	0.989717
149	0.0686244	0.343122		' OHcarbonChainSim'	336.245	1.44444		0.0104	0.00404252	0.989582					0.0104	0.0461566	0.989617
150	0.0688312	0.344156		' OHcarbonChainSim'	338.265	1.75		0.0105	0.00408153	0.989482					0.0105	0.0465989	0.989517
151	0.0690349	0.345174		' OHcarbonChainSim'	340.374	0.64286		0.0106	0.00412054	0.989382					0.0106	0.0470412	0.989418
152	0.0692355	0.346178		' OHcarbonChainSim'	340.567	0.09091		0.0107	0.00415955	0.989281					0.0107	0.0474834	0.989318
153	0.0694331	0.347166		' OHcarbonChainSim'	342.379	0.76923		0.0108	0.00419856	0.989181					0.0108	0.0479256	0.989218
154	0.0696278	0.348139		' OHcarbonChainSim'	344.343	0.91667		0.0109	0.00423758	0.989081					0.0109	0.0483678	0.989119
155	0.0698195	0.349097		' OHcarbonChainSim'	344.54	0.2		0.011	0.0042766	0.98898					0.011	0.0488099	0.989019
156	0.0700082	0.350041		' OHcarbonChainSim'	348.337	1.09091		0.0111	0.00431562	0.98888					0.0111	0.0492521	0.98892
157	0.0701941	0.35097		' OHcarbonChainSim'	348.674	0		0.0112	0.00435465	0.988779					0.0112	0.0496941	0.98882
158	0.0703771	0.351885		' OHcarbonChainSim'	350.301	1.3		0.0113	0.00439367	0.988679					0.0113	0.0501362	0.98872
159	0.0705572	0.352786		' OHcarbonChainSim'	350.438	0.41176		0.0114	0.00443271	0.988579					0.0114	0.0505782	0.988621
160	0.0707346	0.353673		' OHcarbonChainSim'	352.426	0.5		0.0115	0.00447174	0.988478					0.0115	0.0510202	0.988521
161	0.0709092	0.354546		' OHcarbonChainSim'	378.328	1.08333		0.0116	0.00451077	0.988378					0.0116	0.0514622	0.988421
162	0.0710811	0.355406		' OHcarbonChainSim'	380.325	1.27273		0.0117	0.00454981	0.988278					0.0117	0.0519041	0.988322
163	0.0712504	0.356252		' OHcarbonChainSim'	382.262	1.5		0.0118	0.00458885	0.988177					0.0118	0.052346	0.988222
164	0.0714169	0.357085		' OHcarbonChainSim'	384.3	1.77778		0.0119	0.0046279	0.988077					0.0119	0.0527879	0.988123
165	0.0715809	0.357904		' OHcarbonChainSim'	386.444	0.73333		0.012	0.00466695	0.987976					0.012	0.0532297	0.988023
166	0.0717423	0.358711		' OHcarbonChainSim'	388.36	0.85714		0.0121	0.00470599	0.987876					0.0121	0.0536715	0.987923
167	0.0719011	0.359506		' OHcarbonChainSim'	390.548	0.28571		0.0122	0.00474505	0.987776					0.0122	0.0541133	0.987824
168	0.0720575	0.360287		' OHcarbonChainSim'	392.334	1		0.0123	0.0047841	0.987675					0.0123	0.0545551	0.987724
169	0.0722114	0.361057		' OHcarbonChainSim'	394.309	1.16667		0.0124	0.00482316	0.987575					0.0124	0.0549968	0.987625
170	0.0723628	0.361814		' OHcarbonChainSim'	394.482	0.42105		0.0125	0.00486222	0.987474					0.0125	0.0554385	0.987525
171	0.0725119	0.362559		' OHcarbonChainSim'	396.304	1.36364		0.0126	0.00490128	0.987374					0.0126	0.0558801	0.987425
172	0.0726586	0.363293		' OHcarbonChainSim'	396.479	0.5		0.0127	0.00494035	0.987273					0.0127	0.0563218	0.987326
173	0.072803	0.364015		' OHcarbonChainSim'	398.32	1.6		0.0128	0.00497942	0.987173					0.0128	0.0567634	0.987226
174	0.0729452	0.364726		' OHcarbonChainSim'	398.496	0.58824		0.0129	0.00501849	0.987073					0.0129	0.0572049	0.987127
175	0.0730851	0.365425		' OHcarbonChainSim'	398.672	0.12		0.013	0.00505756	0.986972					0.013	0.0576465	0.987027
176	0.0732228	0.366114		' OHcarbonChainSim'	402.592	0.21739		0.0131	0.00509664	0.986872					0.0131	0.058088	0.986928
177	0.0733583	0.366791		' OHcarbonChainSim'	404.763	0		0.0132	0.00513572	0.986771					0.0132	0.0585294	0.986828
178	0.0734917	0.367458		' OHcarbonChainSim'	426.313	1.33333		0.0133	0.0051748	0.986671					0.0133	0.0589709	0.986728
179	0.073623	0.368115		' OHcarbonChainSim'	428.34	1.54545		0.0134	0.00521388	0.98657					0.0134	0.0594123	0.986629
180	0.0737522	0.368761		' OHcarbonChainSim'	430.284	1.8		0.0135	0.00525297	0.98647					0.0135	0.0598537	0.986529
181	0.0738795	0.369397		' OHcarbonChainSim'	430.49	0.70588		0.0136	0.00529206	0.98637					0.0136	0.060295	0.98643
182	0.0740047	0.370023		' OHcarbonChainSim'	432.453	0.8125		0.0137	0.00533115	0.986269					0.0137	0.0607364	0.98633
183	0.0741279	0.37064		' OHcarbonChainSim'	434.435	0.93333		0.0138	0.00537025	0.986169					0.0138	0.0611776	0.986231
184	0.0742493	0.371246		' OHcarbonChainSim'	438.345	1.07143		0.0139	0.00540935	0.986068					0.0139	0.0616189	0.986131
185	0.0743687	0.371844		' OHcarbonChainSim'	440.381	1.23077		0.014	0.00544845	0.985968					0.014	0.0620601	0.986032
186	0.0744863	0.372432		' OHcarbonChainSim'	440.489	0.5		0.0141	0.00548755	0.985867					0.0141	0.0625013	0.985932
187	0.0746021	0.37301		' OHcarbonChainSim'	442.328	1.41667		0.0142	0.00552666	0.985767					0.0142	0.0629425	0.985832
188	0.0747161	0.37358		' OHcarbonChainSim'	442.545	0.57895		0.0143	0.00556577	0.985666					0.0143	0.0633836	0.985733
189	0.0748283	0.374141		' OHcarbonChainSim'	444.73	0.19231		0.0144	0.00560488	0.985566					0.0144	0.0638247	0.985633
190	0.0749388	0.374694		' OHcarbonChainSim'	446.825	0		0.0145	0.00564399	0.985465					0.0145	0.0642658	0.985534
191	0.0750475	0.375238		' OHcarbonChainSim'	448.606	0.29167		0.0146	0.00568311	0.985365					0.0146	0.0647068	0.985434
192	0.0751546	0.375773		' OHcarbonChainSim'	452.436	1		0.0147	0.00572223	0.985264					0.0147	0.0651479	0.985335
193	0.0752601	0.376301		' OHcarbonChainSim'	452.55	0.40909		0.0148	0.00576136	0.985164					0.0148	0.0655888	0.985235
194	0.075364	0.37682		' OHcarbonChainSim'	454.72	0.10345		0.0149	0.00580048	0.985063					0.0149	0.0660298	0.985136
195	0.0754662	0.377331		' OHcarbonChainSim'	474.355	1.58333		0.015	0.00583961	0.984963					0.015	0.0664707	0.985036
196	0.0755669	0.377835		' OHcarbonChainSim'	476.362	1.81818		0.0151	0.00587874	0.984862					0.0151	0.0669116	0.984937
197	0.0756661	0.378331		' OHcarbonChainSim'	476.488	0.77778		0.0152	0.00591787	0.984762					0.0152	0.0673524	0.984837
198	0.0757638	0.378819		' OHcarbonChainSim'	478.513	0.88235		0.0153	0.00595701	0.984661					0.0153	0.0677933	0.984738
199	0.07586	0.3793		' OHcarbonChainSim'	482.485	1		0.0154	0.00599615	0.984561					0.0154	0.068234	0.984638
200	0.0759548	0.379774		' OHcarbonChainSim'	484.431	1.13333		0.0155	0.00603529	0.98446					0.0155	0.0686748	0.984539
201	0.0760481	0.380241		' OHcarbonChainSim'	484.562	0.5		0.0156	0.00607444	0.98436					0.0156	0.0691155	0.984439
202	0.0761401	0.3807		' OHcarbonChainSim'	486.524	0.57143		0.0157	0.00611359	0.984259					0.0157	0.0695562	0.98434
203	0.0762306	0.381153		' OHcarbonChainSim'	492.644	0.30769		0.0158	0.00615274	0.984159					0.0158	0.0699969	0.984241
204	0.0763199	0.381599		' OHcarbonChainSim'	496.856	0.09375		0.0159	0.00619189	0.984058					0.0159	0.0704375	0.984141
205	0.0764078	0.382039						0.016	0.00623105	0.983958					0.016	0.0708781	0.984042
206	0.0764944	0.382472						0.0161	0.00627021	0.983857					0.0161	0.0713187	0.983942
207	0.0765797	0.382898						0.0162	0.00630937	0.983756					0.0162	0.0717592	0.983843
208	0.0766638	0.383319						0.0163	0.00634853	0.983656					0.0163	0.0721997	0.983743
209	0.0767466	0.383733						0.0164	0.0063877	0.983555					0.0164	0.0726402	0.983644
210	0.0768283	0.384141						0.0165	0.00642687	0.983455					0.0165	0.0730807	0.983544
211	0.0769087	0.384544						0.0166	0.00646604	0.983354					0.0166	0.0735211	0.983445
212	0.076988	0.38494						0.0167	0.00650522	0.983254					0.0167	0.0739614	0.983345
213	0.0770661	0.385331						0.0168	0.0065444	0.983153					0.0168	0.0744018	0.983246
214	0.0771431	0.385716						0.0169	0.00658358	0.983052					0.0169	0.0748421	0.983147
215	0.0772191	0.386095						0.017	0.00662276	0.982952					0.017	0.0752824	0.983047
216	0.0772939	0.386469						0.0171	0.00666195	0.982851					0.0171	0.0757226	0.982948
217	0.0773677	0.386838						0.0172	0.00670114	0.982751					0.0172	0.0761629	0.982848
218	0.0774404	0.387202						0.0173	0.00674033	0.98265					0.0173	0.076603	0.982749
219	0.0775121	0.38756						0.0174	0.00677953	0.98255					0.0174	0.0770432	0.982649
220	0.0775827	0.387914						0.0175	0.00681873	0.982449					0.0175	0.0774833	0.98255
221	0.0776524	0.388262						0.0176	0.00685793	0.982348					0.0176	0.0779234	0.982451
222	0.0777211	0.388606						0.0177	0.00689713	0.982248					0.0177	0.0783635	0.982351
223	0.0777889	0.388944						0.0178	0.00693634	0.982147					0.0178	0.0788035	0.982252
224	0.0778557	0.389278						0.0179	0.00697555	0.982047					0.0179	0.0792435	0.982152
225	0.0779216	0.389608						0.018	0.00701476	0.981946					0.018	0.0796835	0.982053
226	0.0779866	0.389933						0.0181	0.00705397	0.981845					0.0181	0.0801234	0.981954
227	0.0780507	0.390253						0.0182	0.00709319	0.981745					0.0182	0.0805633	0.981854
228	0.0781139	0.390569						0.0183	0.00713241	0.981644					0.0183	0.0810031	0.981755
229	0.0781762	0.390881						0.0184	0.00717164	0.981543					0.0184	0.081443	0.981656
230	0.0782377	0.391189						0.0185	0.00721086	0.981443					0.0185	0.0818828	0.981556
231	0.0782984	0.391492						0.0186	0.00725009	0.981342					0.0186	0.0823225	0.981457
232	0.0783583	0.391791						0.0187	0.00728932	0.981241					0.0187	0.0827623	0.981357
233	0.0784173	0.392087						0.0188	0.00732856	0.981141					0.0188	0.083202	0.981258
234	0.0784756	0.392378						0.0189	0.0073678	0.98104					0.0189	0.0836417	0.981159
235	0.0785331	0.392665						0.019	0.00740704	0.98094					0.019	0.0840813	0.981059
236	0.0785898	0.392949						0.0191	0.00744628	0.980839					0.0191	0.0845209	0.98096
237	0.0786458	0.393229						0.0192	0.00748553	0.980738					0.0192	0.0849605	0.980861
238	0.078701	0.393505						0.0193	0.00752478	0.980638					0.0193	0.0854	0.980761
239	0.0787555	0.393778						0.0194	0.00756403	0.980537					0.0194	0.0858395	0.980662
240	0.0788093	0.394047						0.0195	0.00760328	0.980436					0.0195	0.086279	0.980563
241	0.0788625	0.394312						0.0196	0.00764254	0.980336					0.0196	0.0867184	0.980463
242	0.0789149	0.394574						0.0197	0.0076818	0.980235					0.0197	0.0871579	0.980364
243	0.0789666	0.394833						0.0198	0.00772107	0.980134					0.0198	0.0875972	0.980265
244	0.0790177	0.395088						0.0199	0.00776033	0.980033					0.0199	0.0880366	0.980165
245	0.0790681	0.395341						0.02	0.0077996	0.979933					0.02	0.0884759	0.980066
246	0.0791179	0.395589						0.0201	0.00783887	0.979832					0.0201	0.0889152	0.979967
247	0.079167	0.395835						0.0202	0.00787815	0.979731					0.0202	0.0893544	0.979868
248	0.0792156	0.396078						0.0203	0.00791743	0.979631					0.0203	0.0897936	0.979768
249	0.0792635	0.396317						0.0204	0.00795671	0.97953					0.0204	0.0902328	0.979669
250	0.0793108	0.396554						0.0205	0.00799599	0.979429					0.0205	0.0906719	0.97957
251	0.0793575	0.396788						0.0206	0.00803528	0.979329					0.0206	0.0911111	0.97947
252	0.0794037	0.397018						0.0207	0.00807457	0.979228					0.0207	0.0915501	0.979371
253	0.0794492	0.397246						0.0208	0.00811386	0.979127					0.0208	0.0919892	0.979272
254	0.0794942	0.397471						0.0209	0.00815315	0.979026					0.0209	0.0924282	0.979172
255	0.0795387	0.397693						0.021	0.00819245	0.978926					0.021	0.0928672	0.979073
256	0.0795826	0.397913						0.0211	0.00823175	0.978825					0.0211	0.0933061	0.978974
257	0.0796259	0.39813						0.0212	0.00827106	0.978724					0.0212	0.0937451	0.978875
258	0.0796688	0.398344						0.0213	0.00831036	0.978623					0.0213	0.0941839	0.978775
259	0.0797111	0.398556						0.0214	0.00834967	0.978523					0.0214	0.0946228	0.978676
260	0.0797529	0.398765						0.0215	0.00838899	0.978422					0.0215	0.0950616	0.978577
261	0.0797942	0.398971						0.0216	0.0084283	0.978321					0.0216	0.0955004	0.978478
262	0.079835	0.399175						0.0217	0.00846762	0.97822					0.0217	0.0959391	0.978378
263	0.0798754	0.399377						0.0218	0.00850694	0.97812					0.0218	0.0963778	0.978279
264	0.0799152	0.399576						0.0219	0.00854626	0.978019					0.0219	0.0968165	0.97818
265	0.0799546	0.399773						0.022	0.00858559	0.977918					0.022	0.0972552	0.978081
266	0.0799935	0.399968						0.0221	0.00862492	0.977817					0.0221	0.0976938	0.977981
267	0.080032	0.40016						0.0222	0.00866425	0.977717					0.0222	0.0981324	0.977882
268	0.08007	0.40035						0.0223	0.00870359	0.977616					0.0223	0.0985709	0.977783
269	0.0801076	0.400538						0.0224	0.00874293	0.977515					0.0224	0.0990094	0.977684
270	0.0801447	0.400723						0.0225	0.00878227	0.977414					0.0225	0.0994479	0.977585
271	0.0801814	0.400907						0.0226	0.00882161	0.977314					0.0226	0.0998864	0.977485
272	0.0802177	0.401088						0.0227	0.00886096	0.977213					0.0227	0.100325	0.977386
273	0.0802535	0.401268						0.0228	0.00890031	0.977112					0.0228	0.100763	0.977287
274	0.080289	0.401445						0.0229	0.00893967	0.977011					0.0229	0.101202	0.977188
275	0.080324	0.40162						0.023	0.00897902	0.97691					0.023	0.10164	0.977089
276	0.0803587	0.401793						0.0231	0.00901838	0.97681					0.0231	0.102078	0.976989
277	0.080393	0.401965						0.0232	0.00905774	0.976709					0.0232	0.102516	0.97689
278	0.0804268	0.402134						0.0233	0.00909711	0.976608					0.0233	0.102955	0.976791
279	0.0804603	0.402302						0.0234	0.00913648	0.976507					0.0234	0.103393	0.976692
280	0.0804935	0.402467						0.0235	0.00917585	0.976406					0.0235	0.103831	0.976593
281	0.0805262	0.402631						0.0236	0.00921522	0.976305					0.0236	0.104269	0.976494
282	0.0805586	0.402793						0.0237	0.0092546	0.976205					0.0237	0.104707	0.976394
283	0.0805906	0.402953						0.0238	0.00929398	0.976104					0.0238	0.105145	0.976295
284	0.0806223	0.403112						0.0239	0.00933336	0.976003					0.0239	0.105583	0.976196
285	0.0806537	0.403268						0.024	0.00937275	0.975902					0.024	0.106021	0.976097
286	0.0806847	0.403423						0.0241	0.00941214	0.975801					0.0241	0.106459	0.975998
287	0.0807153	0.403577						0.0242	0.00945153	0.9757					0.0242	0.106897	0.975899
288	0.0807457	0.403728						0.0243	0.00949092	0.9756					0.0243	0.107335	0.975799
289	0.0807757	0.403878						0.0244	0.00953032	0.975499					0.0244	0.107773	0.9757
290	0.0808054	0.404027						0.0245	0.00956972	0.975398					0.0245	0.10821	0.975601
291	0.0808347	0.404174						0.0246	0.00960912	0.975297					0.0246	0.108648	0.975502
292	0.0808638	0.404319						0.0247	0.00964853	0.975196					0.0247	0.109086	0.975403
293	0.0808925	0.404463						0.0248	0.00968794	0.975095					0.0248	0.109524	0.975304
294	0.080921	0.404605						0.0249	0.00972735	0.974994					0.0249	0.109961	0.975205
295	0.0809491	0.404746						0.025	0.00976677	0.974893					0.025	0.110399	0.975106
296	0.080977	0.404885						0.0251	0.00980618	0.974793					0.0251	0.110837	0.975007
297	0.0810045	0.405023						0.0252	0.00984561	0.974692					0.0252	0.111274	0.974907
298	0.0810318	0.405159						0.0253	0.00988503	0.974591					0.0253	0.111712	0.974808
299	0.0810588	0.405294						0.0254	0.00992446	0.97449					0.0254	0.112149	0.974709
300	0.0810855	0.405427						0.0255	0.00996389	0.974389					0.0255	0.112587	0.97461
301	0.0811119	0.40556						0.0256	0.0100033	0.974288					0.0256	0.113024	0.974511
302	0.0811381	0.40569						0.0257	0.0100428	0.974187					0.0257	0.113461	0.974412
303	0.081164	0.40582						0.0258	0.0100822	0.974086					0.0258	0.113899	0.974313
304	0.0811896	0.405948						0.0259	0.0101216	0.973985					0.0259	0.114336	0.974214
305	0.081215	0.406075						0.026	0.0101611	0.973884					0.026	0.114773	0.974115
306	0.0812401	0.4062						0.0261	0.0102005	0.973783					0.0261	0.115211	0.974016
307	0.081265	0.406325						0.0262	0.01024	0.973683					0.0262	0.115648	0.973917
308	0.0812896	0.406448						0.0263	0.0102794	0.973582					0.0263	0.116085	0.973818
309	0.081314	0.40657						0.0264	0.0103189	0.973481					0.0264	0.116522	0.973718
310	0.0813381	0.40669						0.0265	0.0103584	0.97338					0.0265	0.116959	0.973619
311	0.081362	0.40681						0.0266	0.0103978	0.973279					0.0266	0.117396	0.97352
312	0.0813856	0.406928						0.0267	0.0104373	0.973178					0.0267	0.117833	0.973421
313	0.081409	0.407045						0.0268	0.0104768	0.973077					0.0268	0.11827	0.973322
314	0.0814322	0.407161						0.0269	0.0105162	0.972976					0.0269	0.118707	0.973223
315	0.0814552	0.407276						0.027	0.0105557	0.972875					0.027	0.119144	0.973124
316	0.0814779	0.40739						0.0271	0.0105952	0.972774					0.0271	0.119581	0.973025
317	0.0815005	0.407502						0.0272	0.0106347	0.972673					0.0272	0.120018	0.972926
318	0.0815228	0.407614						0.0273	0.0106741	0.972572					0.0273	0.120455	0.972827
319	0.0815449	0.407724						0.0274	0.0107136	0.972471					0.0274	0.120892	0.972728
320	0.0815667	0.407834						0.0275	0.0107531	0.97237					0.0275	0.121329	0.972629
321	0.0815884	0.407942						0.0276	0.0107926	0.972269					0.0276	0.121765	0.97253
322	0.0816099	0.408049						0.0277	0.0108321	0.972168					0.0277	0.122202	0.972431
323	0.0816311	0.408156						0.0278	0.0108716	0.972067					0.0278	0.122639	0.972332
324	0.0816522	0.408261						0.0279	0.0109111	0.971966					0.0279	0.123075	0.972233
325	0.0816731	0.408365						0.028	0.0109506	0.971865					0.028	0.123512	0.972134
326	0.0816937	0.408469						0.0281	0.0109901	0.971764					0.0281	0.123948	0.972035
327	0.0817142	0.408571						0.0282	0.0110296	0.971663					0.0282	0.124385	0.971936
328	0.0817345	0.408672						0.0283	0.0110692	0.971562					0.0283	0.124821	0.971837
329	0.0817546	0.408773						0.0284	0.0111087	0.971461					0.0284	0.125258	0.971738
330	0.0817745	0.408872						0.0285	0.0111482	0.97136					0.0285	0.125694	0.971639
331	0.0817942	0.408971						0.0286	0.0111877	0.971259					0.0286	0.126131	0.97154
332	0.0818138	0.409069						0.0287	0.0112272	0.971158					0.0287	0.126567	0.971441
333	0.0818331	0.409166						0.0288	0.0112668	0.971057					0.0288	0.127003	0.971342
334	0.0818523	0.409262						0.0289	0.0113063	0.970956					0.0289	0.127439	0.971244
335	0.0818713	0.409357						0.029	0.0113458	0.970855					0.029	0.127876	0.971145
336	0.0818902	0.409451						0.0291	0.0113854	0.970754					0.0291	0.128312	0.971046
337	0.0819088	0.409544						0.0292	0.0114249	0.970653					0.0292	0.128748	0.970947
338	0.0819273	0.409637						0.0293	0.0114645	0.970552					0.0293	0.129184	0.970848
339	0.0819457	0.409728						0.0294	0.011504	0.970451					0.0294	0.12962	0.970749
340	0.0819639	0.409819						0.0295	0.0115436	0.97035					0.0295	0.130056	0.97065
341	0.0819819	0.409909						0.0296	0.0115831	0.970249					0.0296	0.130492	0.970551
342	0.0819997	0.409999						0.0297	0.0116227	0.970147					0.0297	0.130928	0.970452
343	0.0820174	0.410087						0.0298	0.0116622	0.970046					0.0298	0.131364	0.970353
344	0.082035	0.410175						0.0299	0.0117018	0.969945					0.0299	0.1318	0.970254
345	0.0820524	0.410262						0.03	0.0117414	0.969844					0.03	0.132236	0.970155
346	0.0820696	0.410348						0.0301	0.0117809	0.969743					0.0301	0.132672	0.970056
347	0.0820867	0.410433						0.0302	0.0118205	0.969642					0.0302	0.133108	0.969958
348	0.0821036	0.410518						0.0303	0.0118601	0.969541					0.0303	0.133544	0.969859
349	0.0821204	0.410602						0.0304	0.0118997	0.96944					0.0304	0.133979	0.96976
350	0.0821371	0.410685						0.0305	0.0119393	0.969339					0.0305	0.134415	0.969661
351	0.0821536	0.410768						0.0306	0.0119788	0.969238					0.0306	0.134851	0.969562
352	0.0821699	0.41085						0.0307	0.0120184	0.969137					0.0307	0.135286	0.969463
353	0.0821861	0.410931						0.0308	0.012058	0.969035					0.0308	0.135722	0.969364
354	0.0822022	0.411011						0.0309	0.0120976	0.968934					0.0309	0.136157	0.969265
355	0.0822182	0.411091						0.031	0.0121372	0.968833					0.031	0.136593	0.969167
356	0.082234	0.41117						0.0311	0.0121768	0.968732					0.0311	0.137028	0.969068
357	0.0822497	0.411248						0.0312	0.0122164	0.968631					0.0312	0.137464	0.968969
358	0.0822652	0.411326						0.0313	0.012256	0.96853					0.0313	0.137899	0.96887
359	0.0822806	0.411403						0.0314	0.0122956	0.968429					0.0314	0.138335	0.968771
360	0.0822959	0.41148						0.0315	0.0123353	0.968328					0.0315	0.13877	0.968672
361	0.0823111	0.411556						0.0316	0.0123749	0.968226					0.0316	0.139205	0.968574
362	0.0823261	0.411631						0.0317	0.0124145	0.968125					0.0317	0.13964	0.968475
363	0.0823411	0.411705						0.0318	0.0124541	0.968024					0.0318	0.140076	0.968376
364	0.0823559	0.411779						0.0319	0.0124937	0.967923					0.0319	0.140511	0.968277
365	0.0823705	0.411853						0.032	0.0125334	0.967822					0.032	0.140946	0.968178
366	0.0823851	0.411925						0.0321	0.012573	0.967721					0.0321	0.141381	0.968079
367	0.0823995	0.411998						0.0322	0.0126126	0.967619					0.0322	0.141816	0.967981
368	0.0824138	0.412069						0.0323	0.0126523	0.967518					0.0323	0.142251	0.967882
369	0.082428	0.41214						0.0324	0.0126919	0.967417					0.0324	0.142686	0.967783
370	0.0824421	0.412211						0.0325	0.0127316	0.967316					0.0325	0.143121	0.967684
371	0.0824561	0.41228						0.0326	0.0127712	0.967215					0.0326	0.143556	0.967586
372	0.0824699	0.41235						0.0327	0.0128109	0.967113					0.0327	0.143991	0.967487
373	0.0824837	0.412418						0.0328	0.0128505	0.967012					0.0328	0.144426	0.967388
374	0.0824973	0.412487						0.0329	0.0128902	0.966911					0.0329	0.144861	0.967289
375	0.0825109	0.412554						0.033	0.0129298	0.96681					0.033	0.145296	0.96719
376	0.0825243	0.412621						0.0331	0.0129695	0.966709					0.0331	0.14573	0.967092
377	0.0825376	0.412688						0.0332	0.0130092	0.966607					0.0332	0.146165	0.966993
378	0.0825508	0.412754						0.0333	0.0130488	0.966506					0.0333	0.1466	0.966894
379	0.0825639	0.41282						0.0334	0.0130885	0.966405					0.0334	0.147034	0.966795
380	0.082577	0.412885						0.0335	0.0131282	0.966304					0.0335	0.147469	0.966697
381	0.0825899	0.412949						0.0336	0.0131679	0.966203					0.0336	0.147904	0.966598
382	0.0826027	0.413013						0.0337	0.0132075	0.966101					0.0337	0.148338	0.966499
383	0.0826154	0.413077						0.0338	0.0132472	0.966					0.0338	0.148773	0.9664
384	0.082628	0.41314						0.0339	0.0132869	0.965899					0.0339	0.149207	0.966302
385	0.0826405	0.413203						0.034	0.0133266	0.965798					0.034	0.149641	0.966203
386	0.0826529	0.413265						0.0341	0.0133663	0.965696					0.0341	0.150076	0.966104
387	0.0826652	0.413326						0.0342	0.013406	0.965595					0.0342	0.15051	0.966006
388	0.0826775	0.413387						0.0343	0.0134457	0.965494					0.0343	0.150944	0.965907
389	0.0826896	0.413448						0.0344	0.0134854	0.965393					0.0344	0.151379	0.965808
390	0.0827017	0.413508						0.0345	0.0135251	0.965291					0.0345	0.151813	0.965709
391	0.0827136	0.413568						0.0346	0.0135648	0.96519					0.0346	0.152247	0.965611
392	0.0827255	0.413627						0.0347	0.0136045	0.965089					0.0347	0.152681	0.965512
393	0.0827373	0.413686						0.0348	0.0136443	0.964987					0.0348	0.153115	0.965413
394	0.0827489	0.413745						0.0349	0.013684	0.964886					0.0349	0.15355	0.965315
395	0.0827606	0.413803						0.035	0.0137237	0.964785					0.035	0.153984	0.965216
396	0.0827721	0.41386						0.0351	0.0137634	0.964684					0.0351	0.154418	0.965117
397	0.0827835	0.413917						0.0352	0.0138032	0.964582					0.0352	0.154852	0.965019
398	0.0827948	0.413974						0.0353	0.0138429	0.964481					0.0353	0.155285	0.96492
399	0.0828061	0.414031						0.0354	0.0138826	0.96438					0.0354	0.155719	0.964821
400	0.0828173	0.414086						0.0355	0.0139224	0.964278					0.0355	0.156153	0.964723
401	0.0828284	0.414142						0.0356	0.0139621	0.964177					0.0356	0.156587	0.964624
402	0.0828394	0.414197						0.0357	0.0140019	0.964076					0.0357	0.157021	0.964525
403	0.0828503	0.414252						0.0358	0.0140416	0.963974					0.0358	0.157455	0.964427
404	0.0828612	0.414306						0.0359	0.0140814	0.963873					0.0359	0.157888	0.964328
405	0.082872	0.41436						0.036	0.0141211	0.963772					0.036	0.158322	0.964229
406	0.0828827	0.414413						0.0361	0.0141609	0.96367					0.0361	0.158756	0.964131
407	0.0828933	0.414467						0.0362	0.0142007	0.963569					0.0362	0.159189	0.964032
408	0.0829039	0.414519						0.0363	0.0142404	0.963468					0.0363	0.159623	0.963934
409	0.0829143	0.414572						0.0364	0.0142802	0.963366					0.0364	0.160056	0.963835
410	0.0829247	0.414624						0.0365	0.01432	0.963265					0.0365	0.16049	0.963736
411	0.0829351	0.414675						0.0366	0.0143597	0.963164					0.0366	0.160923	0.963638
412	0.0829453	0.414727						0.0367	0.0143995	0.963062					0.0367	0.161357	0.963539
413	0.0829555	0.414777						0.0368	0.0144393	0.962961					0.0368	0.16179	0.963441
414	0.0829656	0.414828						0.0369	0.0144791	0.96286					0.0369	0.162223	0.963342
415	0.0829756	0.414878						0.037	0.0145189	0.962758					0.037	0.162657	0.963243
416	0.0829856	0.414928						0.0371	0.0145587	0.962657					0.0371	0.16309	0.963145
417	0.0829955	0.414978						0.0372	0.0145985	0.962555					0.0372	0.163523	0.963046
418	0.0830053	0.415027						0.0373	0.0146383	0.962454					0.0373	0.163956	0.962948
419	0.0830151	0.415076						0.0374	0.0146781	0.962353					0.0374	0.164389	0.962849
420	0.0830248	0.415124						0.0375	0.0147179	0.962251					0.0375	0.164822	0.962751
421	0.0830344	0.415172						0.0376	0.0147577	0.96215					0.0376	0.165256	0.962652
422	0.083044	0.41522						0.0377	0.0147975	0.962048					0.0377	0.165689	0.962553
423	0.0830535	0.415267						0.0378	0.0148373	0.961947					0.0378	0.166122	0.962455
424	0.0830629	0.415315						0.0379	0.0148771	0.961846					0.0379	0.166555	0.962356
425	0.0830723	0.415361						0.038	0.0149169	0.961744					0.038	0.166987	0.962258
426	0.0830816	0.415408						0.0381	0.0149568	0.961643					0.0381	0.16742	0.962159
427	0.0830908	0.415454						0.0382	0.0149966	0.961541					0.0382	0.167853	0.962061
428	0.0831	0.4155						0.0383	0.0150364	0.96144					0.0383	0.168286	0.961962
429	0.0831091	0.415546						0.0384	0.0150763	0.961339					0.0384	0.168719	0.961864
430	0.0831182	0.415591						0.0385	0.0151161	0.961237					0.0385	0.169151	0.961765
431	0.0831272	0.415636						0.0386	0.0151559	0.961136					0.0386	0.169584	0.961667
432	0.0831361	0.415681						0.0387	0.0151958	0.961034					0.0387	0.170017	0.961568
433	0.083145	0.415725						0.0388	0.0152356	0.960933					0.0388	0.170449	0.96147
434	0.0831538	0.415769						0.0389	0.0152755	0.960831					0.0389	0.170882	0.961371
435	0.0831626	0.415813						0.039	0.0153153	0.96073					0.039	0.171314	0.961273
436	0.0831713	0.415856						0.0391	0.0153552	0.960628					0.0391	0.171747	0.961174
437	0.0831799	0.4159						0.0392	0.015395	0.960527					0.0392	0.172179	0.961076
438	0.0831885	0.415942						0.0393	0.0154349	0.960425					0.0393	0.172612	0.960977
439	0.083197	0.415985						0.0394	0.0154748	0.960324					0.0394	0.173044	0.960879
440	0.0832055	0.416027						0.0395	0.0155146	0.960222					0.0395	0.173476	0.96078
441	0.0832139	0.41607						0.0396	0.0155545	0.960121					0.0396	0.173909	0.960682
442	0.0832223	0.416111						0.0397	0.0155944	0.960019					0.0397	0.174341	0.960583
443	0.0832306	0.416153						0.0398	0.0156343	0.959918					0.0398	0.174773	0.960485
444	0.0832389	0.416194						0.0399	0.0156742	0.959816					0.0399	0.175205	0.960387
445	0.0832471	0.416235						0.04	0.015714	0.959715					0.04	0.175638	0.960288
446	0.0832552	0.416276						0.0401	0.0157539	0.959613					0.0401	0.17607	0.96019
447	0.0832633	0.416317						0.0402	0.0157938	0.959512					0.0402	0.176502	0.960091
448	0.0832714	0.416357						0.0403	0.0158337	0.95941					0.0403	0.176934	0.959993
449	0.0832794	0.416397						0.0404	0.0158736	0.959309					0.0404	0.177366	0.959894
450	0.0832873	0.416436						0.0405	0.0159135	0.959207					0.0405	0.177798	0.959796
451	0.0832952	0.416476						0.0406	0.0159534	0.959106					0.0406	0.17823	0.959698
452	0.083303	0.416515						0.0407	0.0159933	0.959004					0.0407	0.178661	0.959599
453	0.0833108	0.416554						0.0408	0.0160333	0.958903					0.0408	0.179093	0.959501
454	0.0833186	0.416593						0.0409	0.0160732	0.958801					0.0409	0.179525	0.959402
455	0.0833263	0.416631						0.041	0.0161131	0.9587					0.041	0.179957	0.959304
456	0.0833339	0.41667						0.0411	0.016153	0.958598					0.0411	0.180388	0.959206
457	0.0833415	0.416708						0.0412	0.016193	0.958497					0.0412	0.18082	0.959107
458	0.0833491	0.416745						0.0413	0.0162329	0.958395					0.0413	0.181252	0.959009
459	0.0833566	0.416783						0.0414	0.0162728	0.958293					0.0414	0.181683	0.95891
460	0.0833641	0.41682						0.0415	0.0163128	0.958192					0.0415	0.182115	0.958812
461	0.0833715	0.416857						0.0416	0.0163527	0.95809					0.0416	0.182546	0.958714
462	0.0833789	0.416894						0.0417	0.0163926	0.957989					0.0417	0.182978	0.958615
463	0.0833862	0.416931						0.0418	0.0164326	0.957887					0.0418	0.183409	0.958517
464	0.0833935	0.416967						0.0419	0.0164725	0.957786					0.0419	0.183841	0.958419
465	0.0834007	0.417004						0.042	0.0165125	0.957684					0.042	0.184272	0.95832
466	0.0834079	0.41704						0.0421	0.0165524	0.957582					0.0421	0.184703	0.958222
467	0.0834151	0.417075						0.0422	0.0165924	0.957481					0.0422	0.185135	0.958124
468	0.0834222	0.417111						0.0423	0.0166324	0.957379					0.0423	0.185566	0.958025
469	0.0834292	0.417146						0.0424	0.0166723	0.957278					0.0424	0.185997	0.957927
470	0.0834362	0.417181						0.0425	0.0167123	0.957176					0.0425	0.186428	0.957829
471	0.0834432	0.417216						0.0426	0.0167523	0.957074					0.0426	0.186859	0.95773
472	0.0834502	0.417251						0.0427	0.0167923	0.956973					0.0427	0.18729	0.957632
473	0.0834571	0.417285						0.0428	0.0168322	0.956871					0.0428	0.187722	0.957534
474	0.0834639	0.41732						0.0429	0.0168722	0.956769					0.0429	0.188153	0.957435
475	0.0834707	0.417354						0.043	0.0169122	0.956668					0.043	0.188583	0.957337
476	0.0834775	0.417387						0.0431	0.0169522	0.956566					0.0431	0.189014	0.957239
477	0.0834842	0.417421						0.0432	0.0169922	0.956465					0.0432	0.189445	0.95714
478	0.0834909	0.417455						0.0433	0.0170322	0.956363					0.0433	0.189876	0.957042
479	0.0834976	0.417488						0.0434	0.0170722	0.956261					0.0434	0.190307	0.956944
480	0.0835042	0.417521						0.0435	0.0171122	0.95616					0.0435	0.190738	0.956846
481	0.0835108	0.417554						0.0436	0.0171522	0.956058					0.0436	0.191168	0.956747
482	0.0835173	0.417587						0.0437	0.0171922	0.955956					0.0437	0.191599	0.956649
483	0.0835238	0.417619						0.0438	0.0172322	0.955855					0.0438	0.19203	0.956551
484	0.0835303	0.417651						0.0439	0.0172722	0.955753					0.0439	0.19246	0.956453
485	0.0835367	0.417684						0.044	0.0173123	0.955651					0.044	0.192891	0.956354
486	0.0835431	0.417715						0.0441	0.0173523	0.95555					0.0441	0.193321	0.956256
487	0.0835494	0.417747						0.0442	0.0173923	0.955448					0.0442	0.193752	0.956158
488	0.0835558	0.417779						0.0443	0.0174324	0.955346					0.0443	0.194182	0.95606
489	0.083562	0.41781						0.0444	0.0174724	0.955244					0.0444	0.194613	0.955961
490	0.0835683	0.417841						0.0445	0.0175124	0.955143					0.0445	0.195043	0.955863
491	0.0835745	0.417872						0.0446	0.0175525	0.955041					0.0446	0.195473	0.955765
492	0.0835807	0.417903						0.0447	0.0175925	0.954939					0.0447	0.195904	0.955667
493	0.0835868	0.417934						0.0448	0.0176326	0.954838					0.0448	0.196334	0.955568
494	0.0835929	0.417965						0.0449	0.0176726	0.954736					0.0449	0.196764	0.95547
495	0.083599	0.417995						0.045	0.0177127	0.954634					0.045	0.197194	0.955372
496	0.083605	0.418025						0.0451	0.0177527	0.954532					0.0451	0.197624	0.955274
497	0.083611	0.418055						0.0452	0.0177928	0.954431					0.0452	0.198054	0.955176
498	0.083617	0.418085						0.0453	0.0178329	0.954329					0.0453	0.198484	0.955078
499	0.0836229	0.418115						0.0454	0.0178729	0.954227					0.0454	0.198914	0.954979
500	0.0836288	0.418144						0.0455	0.017913	0.954125					0.0455	0.199344	0.954881
501	0.0836347	0.418173						0.0456	0.0179531	0.954024					0.0456	0.199774	0.954783
502	0.0836405	0.418203						0.0457	0.0179932	0.953922					0.0457	0.200204	0.954685
503	0.0836463	0.418232						0.0458	0.0180332	0.95382					0.0458	0.200634	0.954587
504	0.0836521	0.41826						0.0459	0.0180733	0.953718					0.0459	0.201064	0.954489
505	0.0836578	0.418289						0.046	0.0181134	0.953617					0.046	0.201494	0.95439
506	0.0836635	0.418318						0.0461	0.0181535	0.953515					0.0461	0.201923	0.954292
507	0.0836692	0.418346						0.0462	0.0181936	0.953413					0.0462	0.202353	0.954194
508	0.0836749	0.418374						0.0463	0.0182337	0.953311					0.0463	0.202783	0.954096
509	0.0836805	0.418402						0.0464	0.0182738	0.953209					0.0464	0.203212	0.953998
510	0.0836861	0.41843						0.0465	0.0183139	0.953108					0.0465	0.203642	0.9539
511	0.0836916	0.418458						0.0466	0.018354	0.953006					0.0466	0.204071	0.953802
512	0.0836971	0.418486						0.0467	0.0183941	0.952904					0.0467	0.204501	0.953703
513	0.0837026	0.418513						0.0468	0.0184343	0.952802					0.0468	0.20493	0.953605
514	0.0837081	0.41854						0.0469	0.0184744	0.9527					0.0469	0.205359	0.953507
515	0.0837135	0.418568						0.047	0.0185145	0.952599					0.047	0.205789	0.953409
516	0.0837189	0.418595						0.0471	0.0185546	0.952497					0.0471	0.206218	0.953311
517	0.0837243	0.418622						0.0472	0.0185948	0.952395					0.0472	0.206647	0.953213
518	0.0837297	0.418648						0.0473	0.0186349	0.952293					0.0473	0.207077	0.953115
519	0.083735	0.418675						0.0474	0.018675	0.952191					0.0474	0.207506	0.953017
520	0.0837403	0.418701						0.0475	0.0187152	0.95209					0.0475	0.207935	0.952919
521	0.0837455	0.418728						0.0476	0.0187553	0.951988					0.0476	0.208364	0.952821
522	0.0837508	0.418754						0.0477	0.0187955	0.951886					0.0477	0.208793	0.952723
523	0.083756	0.41878						0.0478	0.0188356	0.951784					0.0478	0.209222	0.952625
524	0.0837612	0.418806						0.0479	0.0188758	0.951682					0.0479	0.209651	0.952527
525	0.0837663	0.418832						0.048	0.0189159	0.95158					0.048	0.21008	0.952429
526	0.0837714	0.418857						0.0481	0.0189561	0.951478					0.0481	0.210509	0.95233
527	0.0837765	0.418883						0.0482	0.0189963	0.951376					0.0482	0.210938	0.952232
528	0.0837816	0.418908						0.0483	0.0190364	0.951275					0.0483	0.211366	0.952134
529	0.0837867	0.418933						0.0484	0.0190766	0.951173					0.0484	0.211795	0.952036
530	0.0837917	0.418958						0.0485	0.0191168	0.951071					0.0485	0.212224	0.951938
531	0.0837967	0.418983						0.0486	0.019157	0.950969					0.0486	0.212653	0.95184
532	0.0838016	0.419008						0.0487	0.0191972	0.950867					0.0487	0.213081	0.951742
533	0.0838066	0.419033						0.0488	0.0192373	0.950765					0.0488	0.21351	0.951644
534	0.0838115	0.419057						0.0489	0.0192775	0.950663					0.0489	0.213938	0.951546
535	0.0838164	0.419082						0.049	0.0193177	0.950561					0.049	0.214367	0.951448
536	0.0838213	0.419106						0.0491	0.0193579	0.950459					0.0491	0.214795	0.95135
537	0.0838261	0.419131						0.0492	0.0193981	0.950358					0.0492	0.215224	0.951252
538	0.0838309	0.419155						0.0493	0.0194383	0.950256					0.0493	0.215652	0.951154
539	0.0838357	0.419179						0.0494	0.0194785	0.950154					0.0494	0.216081	0.951056
540	0.0838405	0.419202						0.0495	0.0195188	0.950052					0.0495	0.216509	0.950958
541	0.0838452	0.419226						0.0496	0.019559	0.94995					0.0496	0.216937	0.95086
542	0.0838499	0.41925						0.0497	0.0195992	0.949848					0.0497	0.217365	0.950763
543	0.0838546	0.419273						0.0498	0.0196394	0.949746					0.0498	0.217794	0.950665
544	0.0838593	0.419297						0.0499	0.0196796	0.949644					0.0499	0.218222	0.950567
545	0.083864	0.41932						0.05	0.0197199	0.949542					0.05	0.21865	0.950469
546	0.0838686	0.419343						0.0501	0.0197601	0.94944					0.0501	0.219078	0.950371
547	0.0838732	0.419366						0.0502	0.0198003	0.949338					0.0502	0.219506	0.950273
548	0.0838778	0.419389						0.0503	0.0198406	0.949236					0.0503	0.219934	0.950175
549	0.0838823	0.419412						0.0504	0.0198808	0.949134					0.0504	0.220362	0.950077
550	0.0838869	0.419434						0.0505	0.0199211	0.949032					0.0505	0.22079	0.949979
551	0.0838914	0.419457						0.0506	0.0199613	0.94893					0.0506	0.221217	0.949881
552	0.0838959	0.419479						0.0507	0.0200016	0.948828					0.0507	0.221645	0.949783
553	0.0839003	0.419502						0.0508	0.0200418	0.948726					0.0508	0.222073	0.949685
554	0.0839048	0.419524						0.0509	0.0200821	0.948624					0.0509	0.222501	0.949587
555	0.0839092	0.419546						0.051	0.0201224	0.948522					0.051	0.222928	0.94949
556	0.0839136	0.419568						0.0511	0.0201626	0.94842					0.0511	0.223356	0.949392
557	0.083918	0.41959						0.0512	0.0202029	0.948318					0.0512	0.223784	0.949294
558	0.0839224	0.419612						0.0513	0.0202432	0.948216					0.0513	0.224211	0.949196
559	0.0839267	0.419634						0.0514	0.0202835	0.948114					0.0514	0.224639	0.949098
560	0.083931	0.419655						0.0515	0.0203238	0.948012					0.0515	0.225066	0.949
561	0.0839353	0.419677						0.0516	0.020364	0.94791					0.0516	0.225494	0.948902
562	0.0839396	0.419698						0.0517	0.0204043	0.947808					0.0517	0.225921	0.948804
563	0.0839438	0.419719						0.0518	0.0204446	0.947706					0.0518	0.226348	0.948707
564	0.0839481	0.41974						0.0519	0.0204849	0.947604					0.0519	0.226776	0.948609
565	0.0839523	0.419761						0.052	0.0205252	0.947502					0.052	0.227203	0.948511
566	0.0839565	0.419782						0.0521	0.0205655	0.9474					0.0521	0.22763	0.948413
567	0.0839607	0.419803						0.0522	0.0206058	0.947298					0.0522	0.228057	0.948315
568	0.0839648	0.419824						0.0523	0.0206461	0.947196					0.0523	0.228484	0.948217
569	0.083969	0.419845						0.0524	0.0206865	0.947094					0.0524	0.228911	0.94812
570	0.0839731	0.419865						0.0525	0.0207268	0.946992					0.0525	0.229338	0.948022
571	0.0839772	0.419886						0.0526	0.0207671	0.946889					0.0526	0.229765	0.947924
572	0.0839812	0.419906						0.0527	0.0208074	0.946787					0.0527	0.230192	0.947826
573	0.0839853	0.419927						0.0528	0.0208478	0.946685					0.0528	0.230619	0.947728
574	0.0839893	0.419947						0.0529	0.0208881	0.946583					0.0529	0.231046	0.947631
575	0.0839934	0.419967						0.053	0.0209284	0.946481					0.053	0.231473	0.947533
576	0.0839974	0.419987						0.0531	0.0209688	0.946379					0.0531	0.2319	0.947435
577	0.0840013	0.420007						0.0532	0.0210091	0.946277					0.0532	0.232327	0.947337
578	0.0840053	0.420027						0.0533	0.0210495	0.946175					0.0533	0.232753	0.94724
579	0.0840093	0.420046						0.0534	0.0210898	0.946073					0.0534	0.23318	0.947142
580	0.0840132	0.420066						0.0535	0.0211302	0.945971					0.0535	0.233607	0.947044
581	0.0840171	0.420085						0.0536	0.0211705	0.945868					0.0536	0.234033	0.946946
582	0.084021	0.420105						0.0537	0.0212109	0.945766					0.0537	0.23446	0.946849
583	0.0840249	0.420124						0.0538	0.0212513	0.945664					0.0538	0.234886	0.946751
584	0.0840287	0.420144						0.0539	0.0212916	0.945562					0.0539	0.235313	0.946653
585	0.0840325	0.420163						0.054	0.021332	0.94546					0.054	0.235739	0.946555
586	0.0840364	0.420182						0.0541	0.0213724	0.945358					0.0541	0.236165	0.946458
587	0.0840402	0.420201						0.0542	0.0214128	0.945256					0.0542	0.236592	0.94636
588	0.0840439	0.42022						0.0543	0.0214532	0.945153					0.0543	0.237018	0.946262
589	0.0840477	0.420239						0.0544	0.0214935	0.945051					0.0544	0.237444	0.946165
590	0.0840515	0.420257						0.0545	0.0215339	0.944949					0.0545	0.23787	0.946067
591	0.0840552	0.420276						0.0546	0.0215743	0.944847					0.0546	0.238296	0.945969
592	0.0840589	0.420295						0.0547	0.0216147	0.944745					0.0547	0.238722	0.945871
593	0.0840626	0.420313						0.0548	0.0216551	0.944643					0.0548	0.239148	0.945774
594	0.0840663	0.420331						0.0549	0.0216955	0.94454					0.0549	0.239574	0.945676
595	0.08407	0.42035						0.055	0.0217359	0.944438					0.055	0.24	0.945578
596	0.0840736	0.420368						0.0551	0.0217764	0.944336					0.0551	0.240426	0.945481
597	0.0840772	0.420386						0.0552	0.0218168	0.944234					0.0552	0.240852	0.945383
598	0.0840809	0.420404						0.0553	0.0218572	0.944132					0.0553	0.241278	0.945285
599	0.0840845	0.420422						0.0554	0.0218976	0.944029					0.0554	0.241704	0.945188
600	0.084088	0.42044						0.0555	0.0219381	0.943927					0.0555	0.24213	0.94509
								0.0556	0.0219785	0.943825					0.0556	0.242555	0.944992
								0.0557	0.0220189	0.943723					0.0557	0.242981	0.944895
								0.0558	0.0220594	0.94362					0.0558	0.243407	0.944797
								0.0559	0.0220998	0.943518					0.0559	0.243832	0.9447
								0.056	0.0221403	0.943416					0.056	0.244258	0.944602
								0.0561	0.0221807	0.943314					0.0561	0.244683	0.944504
								0.0562	0.0222212	0.943211					0.0562	0.245109	0.944407
								0.0563	0.0222616	0.943109					0.0563	0.245534	0.944309
								0.0564	0.0223021	0.943007					0.0564	0.245959	0.944212
								0.0565	0.0223425	0.942905					0.0565	0.246385	0.944114
								0.0566	0.022383	0.942802					0.0566	0.24681	0.944016
								0.0567	0.0224235	0.9427					0.0567	0.247235	0.943919
								0.0568	0.022464	0.942598					0.0568	0.24766	0.943821
								0.0569	0.0225044	0.942496					0.0569	0.248085	0.943724
								0.057	0.0225449	0.942393					0.057	0.24851	0.943626
								0.0571	0.0225854	0.942291					0.0571	0.248936	0.943529
								0.0572	0.0226259	0.942189					0.0572	0.249361	0.943431
								0.0573	0.0226664	0.942086					0.0573	0.249785	0.943333
								0.0574	0.0227069	0.941984					0.0574	0.25021	0.943236
								0.0575	0.0227474	0.941882					0.0575	0.250635	0.943138
								0.0576	0.0227879	0.941779					0.0576	0.25106	0.943041
								0.0577	0.0228284	0.941677					0.0577	0.251485	0.942943
								0.0578	0.0228689	0.941575					0.0578	0.25191	0.942846
								0.0579	0.0229094	0.941472					0.0579	0.252334	0.942748
								0.058	0.02295	0.94137					0.058	0.252759	0.942651
								0.0581	0.0229905	0.941268					0.0581	0.253184	0.942553
								0.0582	0.023031	0.941165					0.0582	0.253608	0.942456
								0.0583	0.0230716	0.941063					0.0583	0.254033	0.942358
								0.0584	0.0231121	0.940961					0.0584	0.254457	0.942261
								0.0585	0.0231526	0.940858					0.0585	0.254881	0.942163
								0.0586	0.0231932	0.940756					0.0586	0.255306	0.942066
								0.0587	0.0232337	0.940654					0.0587	0.25573	0.941968
								0.0588	0.0232743	0.940551					0.0588	0.256154	0.941871
								0.0589	0.0233148	0.940449					0.0589	0.256579	0.941773
								0.059	0.0233554	0.940346					0.059	0.257003	0.941676
								0.0591	0.023396	0.940244					0.0591	0.257427	0.941579
								0.0592	0.0234365	0.940142					0.0592	0.257851	0.941481
								0.0593	0.0234771	0.940039					0.0593	0.258275	0.941384
								0.0594	0.0235177	0.939937					0.0594	0.258699	0.941286
								0.0595	0.0235582	0.939834					0.0595	0.259123	0.941189
								0.0596	0.0235988	0.939732					0.0596	0.259547	0.941091
								0.0597	0.0236394	0.939629					0.0597	0.259971	0.940994
								0.0598	0.02368	0.939527					0.0598	0.260395	0.940897
								0.0599	0.0237206	0.939425					0.0599	0.260819	0.940799
								0.06	0.0237612	0.939322					0.06	0.261242	0.940702
								0.0601	0.0238018	0.93922					0.0601	0.261666	0.940604
								0.0602	0.0238424	0.939117					0.0602	0.26209	0.940507
								0.0603	0.023883	0.939015					0.0603	0.262513	0.94041
								0.0604	0.0239236	0.938912					0.0604	0.262937	0.940312
								0.0605	0.0239642	0.93881					0.0605	0.26336	0.940215
								0.0606	0.0240048	0.938707					0.0606	0.263784	0.940118
								0.0607	0.0240455	0.938605					0.0607	0.264207	0.94002
								0.0608	0.0240861	0.938502					0.0608	0.264631	0.939923
								0.0609	0.0241267	0.9384					0.0609	0.265054	0.939826
								0.061	0.0241674	0.938297					0.061	0.265477	0.939728
								0.0611	0.024208	0.938195					0.0611	0.265901	0.939631
								0.0612	0.0242486	0.938093					0.0612	0.266324	0.939534
								0.0613	0.0242893	0.93799					0.0613	0.266747	0.939436
								0.0614	0.0243299	0.937887					0.0614	0.26717	0.939339
								0.0615	0.0243706	0.937785					0.0615	0.267593	0.939242
								0.0616	0.0244112	0.937682					0.0616	0.268016	0.939144
								0.0617	0.0244519	0.93758					0.0617	0.268439	0.939047
								0.0618	0.0244926	0.937477					0.0618	0.268862	0.93895
								0.0619	0.0245332	0.937375					0.0619	0.269285	0.938852
								0.062	0.0245739	0.937272					0.062	0.269708	0.938755
								0.0621	0.0246146	0.93717					0.0621	0.270131	0.938658
								0.0622	0.0246553	0.937067					0.0622	0.270553	0.938561
								0.0623	0.024696	0.936965					0.0623	0.270976	0.938463
								0.0624	0.0247366	0.936862					0.0624	0.271399	0.938366
								0.0625	0.0247773	0.93676					0.0625	0.271821	0.938269
								0.0626	0.024818	0.936657					0.0626	0.272244	0.938172
								0.0627	0.0248587	0.936554					0.0627	0.272666	0.938074
								0.0628	0.0248994	0.936452					0.0628	0.273089	0.937977
								0.0629	0.0249401	0.936349					0.0629	0.273511	0.93788
								0.063	0.0249809	0.936247					0.063	0.273934	0.937783
								0.0631	0.0250216	0.936144					0.0631	0.274356	0.937685
								0.0632	0.0250623	0.936041					0.0632	0.274778	0.937588
								0.0633	0.025103	0.935939					0.0633	0.275201	0.937491
								0.0634	0.0251437	0.935836					0.0634	0.275623	0.937394
								0.0635	0.0251845	0.935734					0.0635	0.276045	0.937297
								0.0636	0.0252252	0.935631					0.0636	0.276467	0.9372
								0.0637	0.0252659	0.935528					0.0637	0.276889	0.937102
								0.0638	0.0253067	0.935426					0.0638	0.277311	0.937005
								0.0639	0.0253474	0.935323					0.0639	0.277733	0.936908
								0.064	0.0253882	0.93522					0.064	0.278155	0.936811
								0.0641	0.0254289	0.935118					0.0641	0.278577	0.936714
								0.0642	0.0254697	0.935015					0.0642	0.278999	0.936617
								0.0643	0.0255105	0.934912					0.0643	0.279421	0.936519
								0.0644	0.0255512	0.93481					0.0644	0.279842	0.936422
								0.0645	0.025592	0.934707					0.0645	0.280264	0.936325
								0.0646	0.0256328	0.934604					0.0646	0.280686	0.936228
								0.0647	0.0256735	0.934502					0.0647	0.281107	0.936131
								0.0648	0.0257143	0.934399					0.0648	0.281529	0.936034
								0.0649	0.0257551	0.934296					0.0649	0.28195	0.935937
								0.065	0.0257959	0.934194					0.065	0.282372	0.93584
								0.0651	0.0258367	0.934091					0.0651	0.282793	0.935742
								0.0652	0.0258775	0.933988					0.0652	0.283215	0.935645
								0.0653	0.0259183	0.933886					0.0653	0.283636	0.935548
								0.0654	0.0259591	0.933783					0.0654	0.284057	0.935451
								0.0655	0.0259999	0.93368					0.0655	0.284478	0.935354
								0.0656	0.0260407	0.933577					0.0656	0.2849	0.935257
								0.0657	0.0260815	0.933475					0.0657	0.285321	0.93516
								0.0658	0.0261223	0.933372					0.0658	0.285742	0.935063
								0.0659	0.0261632	0.933269					0.0659	0.286163	0.934966
								0.066	0.026204	0.933167					0.066	0.286584	0.934869
								0.0661	0.0262448	0.933064					0.0661	0.287005	0.934772
								0.0662	0.0262857	0.932961					0.0662	0.287426	0.934675
								0.0663	0.0263265	0.932858					0.0663	0.287847	0.934578
								0.0664	0.0263674	0.932756					0.0664	0.288267	0.934481
								0.0665	0.0264082	0.932653					0.0665	0.288688	0.934384
								0.0666	0.0264491	0.93255					0.0666	0.289109	0.934287
								0.0667	0.0264899	0.932447					0.0667	0.289529	0.93419
								0.0668	0.0265308	0.932344					0.0668	0.28995	0.934093
								0.0669	0.0265716	0.932242					0.0669	0.290371	0.933996
								0.067	0.0266125	0.932139					0.067	0.290791	0.933899
								0.0671	0.0266534	0.932036					0.0671	0.291212	0.933802
								0.0672	0.0266942	0.931933					0.0672	0.291632	0.933705
								0.0673	0.0267351	0.93183					0.0673	0.292052	0.933608
								0.0674	0.026776	0.931728					0.0674	0.292473	0.933511
								0.0675	0.0268169	0.931625					0.0675	0.292893	0.933414
								0.0676	0.0268578	0.931522					0.0676	0.293313	0.933317
								0.0677	0.0268987	0.931419					0.0677	0.293734	0.93322
								0.0678	0.0269396	0.931316					0.0678	0.294154	0.933123
								0.0679	0.0269805	0.931213					0.0679	0.294574	0.933026
								0.068	0.0270214	0.931111					0.068	0.294994	0.932929
								0.0681	0.0270623	0.931008					0.0681	0.295414	0.932832
								0.0682	0.0271032	0.930905					0.0682	0.295834	0.932735
								0.0683	0.0271441	0.930802					0.0683	0.296254	0.932639
								0.0684	0.0271851	0.930699					0.0684	0.296674	0.932542
								0.0685	0.027226	0.930596					0.0685	0.297093	0.932445
								0.0686	0.0272669	0.930493					0.0686	0.297513	0.932348
								0.0687	0.0273079	0.93039					0.0687	0.297933	0.932251
								0.0688	0.0273488	0.930288					0.0688	0.298352	0.932154
								0.0689	0.0273897	0.930185					0.0689	0.298772	0.932057
								0.069	0.0274307	0.930082					0.069	0.299192	0.93196
								0.0691	0.0274716	0.929979					0.0691	0.299611	0.931864
								0.0692	0.0275126	0.929876					0.0692	0.300031	0.931767
								0.0693	0.0275536	0.929773					0.0693	0.30045	0.93167
								0.0694	0.0275945	0.92967					0.0694	0.30087	0.931573
								0.0695	0.0276355	0.929567					0.0695	0.301289	0.931476
								0.0696	0.0276765	0.929464					0.0696	0.301708	0.931379
								0.0697	0.0277174	0.929361					0.0697	0.302127	0.931283
								0.0698	0.0277584	0.929258					0.0698	0.302547	0.931186
								0.0699	0.0277994	0.929155					0.0699	0.302966	0.931089
								0.07	0.0278404	0.929052					0.07	0.303385	0.930992
								0.0701	0.0278814	0.92895					0.0701	0.303804	0.930895
								0.0702	0.0279224	0.928847					0.0702	0.304223	0.930799
								0.0703	0.0279634	0.928744					0.0703	0.304642	0.930702
								0.0704	0.0280044	0.928641					0.0704	0.305061	0.930605
								0.0705	0.0280454	0.928538					0.0705	0.30548	0.930508
								0.0706	0.0280864	0.928435					0.0706	0.305898	0.930411
								0.0707	0.0281274	0.928332					0.0707	0.306317	0.930315
								0.0708	0.0281684	0.928229					0.0708	0.306736	0.930218
								0.0709	0.0282095	0.928126					0.0709	0.307154	0.930121
								0.071	0.0282505	0.928023					0.071	0.307573	0.930024
								0.0711	0.0282915	0.92792					0.0711	0.307992	0.929928
								0.0712	0.0283325	0.927817					0.0712	0.30841	0.929831
								0.0713	0.0283736	0.927714					0.0713	0.308829	0.929734
								0.0714	0.0284146	0.927611					0.0714	0.309247	0.929638
								0.0715	0.0284557	0.927508					0.0715	0.309665	0.929541
								0.0716	0.0284967	0.927405					0.0716	0.310084	0.929444
								0.0717	0.0285378	0.927301					0.0717	0.310502	0.929348
								0.0718	0.0285789	0.927198					0.0718	0.31092	0.929251
								0.0719	0.0286199	0.927095					0.0719	0.311338	0.929154
								0.072	0.028661	0.926992					0.072	0.311757	0.929057
								0.0721	0.0287021	0.926889					0.0721	0.312175	0.928961
								0.0722	0.0287431	0.926786					0.0722	0.312593	0.928864
								0.0723	0.0287842	0.926683					0.0723	0.313011	0.928767
								0.0724	0.0288253	0.92658					0.0724	0.313429	0.928671
								0.0725	0.0288664	0.926477					0.0725	0.313846	0.928574
								0.0726	0.0289075	0.926374					0.0726	0.314264	0.928478
								0.0727	0.0289486	0.926271					0.0727	0.314682	0.928381
								0.0728	0.0289897	0.926168					0.0728	0.3151	0.928284
								0.0729	0.0290308	0.926065					0.0729	0.315518	0.928188
								0.073	0.0290719	0.925961					0.073	0.315935	0.928091
								0.0731	0.029113	0.925858					0.0731	0.316353	0.927994
								0.0732	0.0291541	0.925755					0.0732	0.31677	0.927898
								0.0733	0.0291952	0.925652					0.0733	0.317188	0.927801
								0.0734	0.0292364	0.925549					0.0734	0.317605	0.927705
								0.0735	0.0292775	0.925446					0.0735	0.318023	0.927608
								0.0736	0.0293186	0.925343					0.0736	0.31844	0.927512
								0.0737	0.0293598	0.925239					0.0737	0.318857	0.927415
								0.0738	0.0294009	0.925136					0.0738	0.319275	0.927318
								0.0739	0.0294421	0.925033					0.0739	0.319692	0.927222
								0.074	0.0294832	0.92493					0.074	0.320109	0.927125
								0.0741	0.0295244	0.924827					0.0741	0.320526	0.927029
								0.0742	0.0295655	0.924724					0.0742	0.320943	0.926932
								0.0743	0.0296067	0.92462					0.0743	0.32136	0.926836
								0.0744	0.0296479	0.924517					0.0744	0.321777	0.926739
								0.0745	0.029689	0.924414					0.0745	0.322194	0.926643
								0.0746	0.0297302	0.924311					0.0746	0.322611	0.926546
								0.0747	0.0297714	0.924208					0.0747	0.323028	0.92645
								0.0748	0.0298126	0.924104					0.0748	0.323444	0.926353
								0.0749	0.0298538	0.924001					0.0749	0.323861	0.926257
								0.075	0.029895	0.923898					0.075	0.324278	0.92616
								0.0751	0.0299362	0.923795					0.0751	0.324694	0.926064
								0.0752	0.0299774	0.923692					0.0752	0.325111	0.925967
								0.0753	0.0300186	0.923588					0.0753	0.325527	0.925871
								0.0754	0.0300598	0.923485					0.0754	0.325944	0.925774
								0.0755	0.030101	0.923382					0.0755	0.32636	0.925678
								0.0756	0.0301422	0.923279					0.0756	0.326777	0.925581
								0.0757	0.0301834	0.923175					0.0757	0.327193	0.925485
								0.0758	0.0302246	0.923072					0.0758	0.327609	0.925389
								0.0759	0.0302659	0.922969					0.0759	0.328025	0.925292
								0.076	0.0303071	0.922865					0.076	0.328441	0.925196
								0.0761	0.0303483	0.922762					0.0761	0.328858	0.925099
								0.0762	0.0303896	0.922659					0.0762	0.329274	0.925003
								0.0763	0.0304308	0.922556					0.0763	0.32969	0.924906
								0.0764	0.0304721	0.922452					0.0764	0.330106	0.92481
								0.0765	0.0305133	0.922349					0.0765	0.330522	0.924714
								0.0766	0.0305546	0.922246					0.0766	0.330937	0.924617
								0.0767	0.0305959	0.922142					0.0767	0.331353	0.924521
								0.0768	0.0306371	0.922039					0.0768	0.331769	0.924425
								0.0769	0.0306784	0.921936					0.0769	0.332185	0.924328
								0.077	0.0307197	0.921832					0.077	0.3326	0.924232
								0.0771	0.030761	0.921729					0.0771	0.333016	0.924136
								0.0772	0.0308022	0.921626					0.0772	0.333431	0.924039
								0.0773	0.0308435	0.921522					0.0773	0.333847	0.923943
								0.0774	0.0308848	0.921419					0.0774	0.334262	0.923847
								0.0775	0.0309261	0.921316					0.0775	0.334678	0.92375
								0.0776	0.0309674	0.921212					0.0776	0.335093	0.923654
								0.0777	0.0310087	0.921109					0.0777	0.335508	0.923558
								0.0778	0.03105	0.921006					0.0778	0.335924	0.923461
								0.0779	0.0310914	0.920902					0.0779	0.336339	0.923365
								0.078	0.0311327	0.920799					0.078	0.336754	0.923269
								0.0781	0.031174	0.920695					0.0781	0.337169	0.923172
								0.0782	0.0312153	0.920592					0.0782	0.337584	0.923076
								0.0783	0.0312567	0.920489					0.0783	0.337999	0.92298
								0.0784	0.031298	0.920385					0.0784	0.338414	0.922884
								0.0785	0.0313393	0.920282					0.0785	0.338829	0.922787
								0.0786	0.0313807	0.920178					0.0786	0.339244	0.922691
								0.0787	0.031422	0.920075					0.0787	0.339659	0.922595
								0.0788	0.0314634	0.919971					0.0788	0.340074	0.922499
								0.0789	0.0315047	0.919868					0.0789	0.340488	0.922402
								0.079	0.0315461	0.919765					0.079	0.340903	0.922306
								0.0791	0.0315875	0.919661					0.0791	0.341317	0.92221
								0.0792	0.0316288	0.919558					0.0792	0.341732	0.922114
								0.0793	0.0316702	0.919454					0.0793	0.342146	0.922018
								0.0794	0.0317116	0.919351					0.0794	0.342561	0.921921
								0.0795	0.031753	0.919247					0.0795	0.342975	0.921825
								0.0796	0.0317943	0.919144					0.0796	0.34339	0.921729
								0.0797	0.0318357	0.91904					0.0797	0.343804	0.921633
								0.0798	0.0318771	0.918937					0.0798	0.344218	0.921537
								0.0799	0.0319185	0.918833					0.0799	0.344632	0.92144
								0.08	0.0319599	0.91873					0.08	0.345047	0.921344
								0.0801	0.0320013	0.918626					0.0801	0.345461	0.921248
								0.0802	0.0320428	0.918523					0.0802	0.345875	0.921152
								0.0803	0.0320842	0.918419					0.0803	0.346289	0.921056
								0.0804	0.0321256	0.918316					0.0804	0.346703	0.92096
								0.0805	0.032167	0.918212					0.0805	0.347116	0.920864
								0.0806	0.0322084	0.918109					0.0806	0.34753	0.920767
								0.0807	0.0322499	0.918005					0.0807	0.347944	0.920671
								0.0808	0.0322913	0.917902					0.0808	0.348358	0.920575
								0.0809	0.0323328	0.917798					0.0809	0.348771	0.920479
								0.081	0.0323742	0.917695					0.081	0.349185	0.920383
								0.0811	0.0324157	0.917591					0.0811	0.349599	0.920287
								0.0812	0.0324571	0.917487					0.0812	0.350012	0.920191
								0.0813	0.0324986	0.917384					0.0813	0.350426	0.920095
								0.0814	0.03254	0.91728					0.0814	0.350839	0.919999
								0.0815	0.0325815	0.917177					0.0815	0.351252	0.919903
								0.0816	0.032623	0.917073					0.0816	0.351666	0.919807
								0.0817	0.0326645	0.91697					0.0817	0.352079	0.919711
								0.0818	0.0327059	0.916866					0.0818	0.352492	0.919615
								0.0819	0.0327474	0.916762					0.0819	0.352905	0.919519
								0.082	0.0327889	0.916659					0.082	0.353319	0.919423
								0.0821	0.0328304	0.916555					0.0821	0.353732	0.919327
								0.0822	0.0328719	0.916451					0.0822	0.354145	0.919231
								0.0823	0.0329134	0.916348					0.0823	0.354558	0.919135
								0.0824	0.0329549	0.916244					0.0824	0.35497	0.919039
								0.0825	0.0329964	0.916141					0.0825	0.355383	0.918943
								0.0826	0.0330379	0.916037					0.0826	0.355796	0.918847
								0.0827	0.0330795	0.915933					0.0827	0.356209	0.918751
								0.0828	0.033121	0.91583					0.0828	0.356622	0.918655
								0.0829	0.0331625	0.915726					0.0829	0.357034	0.918559
								0.083	0.033204	0.915622					0.083	0.357447	0.918463
								0.0831	0.0332456	0.915519					0.0831	0.357859	0.918367
								0.0832	0.0332871	0.915415					0.0832	0.358272	0.918271
								0.0833	0.0333287	0.915311					0.0833	0.358684	0.918175
								0.0834	0.0333702	0.915208					0.0834	0.359097	0.918079
								0.0835	0.0334118	0.915104					0.0835	0.359509	0.917983
								0.0836	0.0334533	0.915					0.0836	0.359921	0.917887
								0.0837	0.0334949	0.914896					0.0837	0.360333	0.917791
								0.0838	0.0335365	0.914793					0.0838	0.360746	0.917695
								0.0839	0.033578	0.914689					0.0839	0.361158	0.917599
								0.084	0.0336196	0.914585					0.084	0.36157	0.917504
								0.0841	0.0336612	0.914482					0.0841	0.361982	0.917408
								0.0842	0.0337028	0.914378					0.0842	0.362394	0.917312
								0.0843	0.0337444	0.914274					0.0843	0.362806	0.917216
								0.0844	0.033786	0.91417					0.0844	0.363218	0.91712
								0.0845	0.0338276	0.914067					0.0845	0.363629	0.917024
								0.0846	0.0338692	0.913963					0.0846	0.364041	0.916928
								0.0847	0.0339108	0.913859					0.0847	0.364453	0.916833
								0.0848	0.0339524	0.913755					0.0848	0.364864	0.916737
								0.0849	0.033994	0.913652					0.0849	0.365276	0.916641
								0.085	0.0340356	0.913548					0.085	0.365688	0.916545
								0.0851	0.0340773	0.913444					0.0851	0.366099	0.916449
								0.0852	0.0341189	0.91334					0.0852	0.366511	0.916353
								0.0853	0.0341605	0.913236					0.0853	0.366922	0.916258
								0.0854	0.0342022	0.913133					0.0854	0.367333	0.916162
								0.0855	0.0342438	0.913029					0.0855	0.367745	0.916066
								0.0856	0.0342855	0.912925					0.0856	0.368156	0.91597
								0.0857	0.0343271	0.912821					0.0857	0.368567	0.915875
								0.0858	0.0343688	0.912717					0.0858	0.368978	0.915779
								0.0859	0.0344104	0.912613					0.0859	0.369389	0.915683
								0.086	0.0344521	0.91251					0.086	0.3698	0.915587
								0.0861	0.0344938	0.912406					0.0861	0.370211	0.915492
								0.0862	0.0345354	0.912302					0.0862	0.370622	0.915396
								0.0863	0.0345771	0.912198					0.0863	0.371033	0.9153
								0.0864	0.0346188	0.912094					0.0864	0.371444	0.915204
								0.0865	0.0346605	0.91199					0.0865	0.371854	0.915109
								0.0866	0.0347022	0.911886					0.0866	0.372265	0.915013
								0.0867	0.0347439	0.911783					0.0867	0.372676	0.914917
								0.0868	0.0347856	0.911679					0.0868	0.373086	0.914822
								0.0869	0.0348273	0.911575					0.0869	0.373497	0.914726
								0.087	0.034869	0.911471					0.087	0.373907	0.91463
								0.0871	0.0349107	0.911367					0.0871	0.374318	0.914534
								0.0872	0.0349524	0.911263					0.0872	0.374728	0.914439
								0.0873	0.0349941	0.911159					0.0873	0.375139	0.914343
								0.0874	0.0350359	0.911055					0.0874	0.375549	0.914247
								0.0875	0.0350776	0.910951					0.0875	0.375959	0.914152
								0.0876	0.0351193	0.910847					0.0876	0.376369	0.914056
								0.0877	0.0351611	0.910743					0.0877	0.376779	0.913961
								0.0878	0.0352028	0.91064					0.0878	0.377189	0.913865
								0.0879	0.0352446	0.910536					0.0879	0.377599	0.913769
								0.088	0.0352863	0.910432					0.088	0.378009	0.913674
								0.0881	0.0353281	0.910328					0.0881	0.378419	0.913578
								0.0882	0.0353699	0.910224					0.0882	0.378829	0.913483
								0.0883	0.0354116	0.91012					0.0883	0.379239	0.913387
								0.0884	0.0354534	0.910016					0.0884	0.379649	0.913291
								0.0885	0.0354952	0.909912					0.0885	0.380058	0.913196
								0.0886	0.035537	0.909808					0.0886	0.380468	0.9131
								0.0887	0.0355787	0.909704					0.0887	0.380878	0.913005
								0.0888	0.0356205	0.9096					0.0888	0.381287	0.912909
								0.0889	0.0356623	0.909496					0.0889	0.381697	0.912814
								0.089	0.0357041	0.909392					0.089	0.382106	0.912718
								0.0891	0.0357459	0.909288					0.0891	0.382515	0.912623
								0.0892	0.0357877	0.909184					0.0892	0.382925	0.912527
								0.0893	0.0358296	0.90908					0.0893	0.383334	0.912431
								0.0894	0.0358714	0.908976					0.0894	0.383743	0.912336
								0.0895	0.0359132	0.908872					0.0895	0.384152	0.91224
								0.0896	0.035955	0.908768					0.0896	0.384561	0.912145
								0.0897	0.0359969	0.908663					0.0897	0.38497	0.912049
								0.0898	0.0360387	0.908559					0.0898	0.385379	0.911954
								0.0899	0.0360805	0.908455					0.0899	0.385788	0.911859
								0.09	0.0361224	0.908351					0.09	0.386197	0.911763
								0.0901	0.0361642	0.908247					0.0901	0.386606	0.911668
								0.0902	0.0362061	0.908143					0.0902	0.387015	0.911572
								0.0903	0.0362479	0.908039					0.0903	0.387423	0.911477
								0.0904	0.0362898	0.907935					0.0904	0.387832	0.911381
								0.0905	0.0363317	0.907831					0.0905	0.388241	0.911286
								0.0906	0.0363735	0.907727					0.0906	0.388649	0.91119
								0.0907	0.0364154	0.907623					0.0907	0.389058	0.911095
								0.0908	0.0364573	0.907519					0.0908	0.389466	0.911
								0.0909	0.0364992	0.907414					0.0909	0.389875	0.910904
								0.091	0.0365411	0.90731					0.091	0.390283	0.910809
								0.0911	0.036583	0.907206					0.0911	0.390691	0.910713
								0.0912	0.0366249	0.907102					0.0912	0.391099	0.910618
								0.0913	0.0366668	0.906998					0.0913	0.391508	0.910523
								0.0914	0.0367087	0.906894					0.0914	0.391916	0.910427
								0.0915	0.0367506	0.906789					0.0915	0.392324	0.910332
								0.0916	0.0367925	0.906685					0.0916	0.392732	0.910237
								0.0917	0.0368344	0.906581					0.0917	0.39314	0.910141
								0.0918	0.0368764	0.906477					0.0918	0.393548	0.910046
								0.0919	0.0369183	0.906373					0.0919	0.393955	0.909951
								0.092	0.0369602	0.906269					0.092	0.394363	0.909855
								0.0921	0.0370022	0.906164					0.0921	0.394771	0.90976
								0.0922	0.0370441	0.90606					0.0922	0.395179	0.909665
								0.0923	0.0370861	0.905956					0.0923	0.395586	0.909569
								0.0924	0.037128	0.905852					0.0924	0.395994	0.909474
								0.0925	0.03717	0.905748					0.0925	0.396401	0.909379
								0.0926	0.037212	0.905643					0.0926	0.396809	0.909283
								0.0927	0.0372539	0.905539					0.0927	0.397216	0.909188
								0.0928	0.0372959	0.905435					0.0928	0.397624	0.909093
								0.0929	0.0373379	0.905331					0.0929	0.398031	0.908998
								0.093	0.0373799	0.905226					0.093	0.398438	0.908902
								0.0931	0.0374219	0.905122					0.0931	0.398845	0.908807
								0.0932	0.0374638	0.905018					0.0932	0.399252	0.908712
								0.0933	0.0375058	0.904914					0.0933	0.399659	0.908617
								0.0934	0.0375478	0.904809					0.0934	0.400067	0.908521
								0.0935	0.0375899	0.904705					0.0935	0.400473	0.908426
								0.0936	0.0376319	0.904601					0.0936	0.40088	0.908331
								0.0937	0.0376739	0.904496					0.0937	0.401287	0.908236
								0.0938	0.0377159	0.904392					0.0938	0.401694	0.908141
								0.0939	0.0377579	0.904288					0.0939	0.402101	0.908045
								0.094	0.0378	0.904184					0.094	0.402507	0.90795
								0.0941	0.037842	0.904079					0.0941	0.402914	0.907855
								0.0942	0.037884	0.903975					0.0942	0.403321	0.90776
								0.0943	0.0379261	0.903871					0.0943	0.403727	0.907665
								0.0944	0.0379681	0.903766					0.0944	0.404134	0.90757
								0.0945	0.0380102	0.903662					0.0945	0.40454	0.907474
								0.0946	0.0380522	0.903558					0.0946	0.404946	0.907379
								0.0947	0.0380943	0.903453					0.0947	0.405353	0.907284
								0.0948	0.0381364	0.903349					0.0948	0.405759	0.907189
								0.0949	0.0381784	0.903244					0.0949	0.406165	0.907094
								0.095	0.0382205	0.90314					0.095	0.406571	0.906999
								0.0951	0.0382626	0.903036					0.0951	0.406977	0.906904
								0.0952	0.0383047	0.902931					0.0952	0.407383	0.906809
								0.0953	0.0383468	0.902827					0.0953	0.407789	0.906714
								0.0954	0.0383889	0.902723					0.0954	0.408195	0.906619
								0.0955	0.038431	0.902618					0.0955	0.408601	0.906523
								0.0956	0.0384731	0.902514					0.0956	0.409007	0.906428
								0.0957	0.0385152	0.902409					0.0957	0.409413	0.906333
								0.0958	0.0385573	0.902305					0.0958	0.409818	0.906238
								0.0959	0.0385994	0.9022					0.0959	0.410224	0.906143
								0.096	0.0386415	0.902096					0.096	0.41063	0.906048
								0.0961	0.0386837	0.901992					0.0961	0.411035	0.905953
								0.0962	0.0387258	0.901887					0.0962	0.41144	0.905858
								0.0963	0.0387679	0.901783					0.0963	0.411846	0.905763
								0.0964	0.0388101	0.901678					0.0964	0.412251	0.905668
								0.0965	0.0388522	0.901574					0.0965	0.412657	0.905573
								0.0966	0.0388944	0.901469					0.0966	0.413062	0.905478
								0.0967	0.0389365	0.901365					0.0967	0.413467	0.905383
								0.0968	0.0389787	0.90126					0.0968	0.413872	0.905288
								0.0969	0.0390208	0.901156					0.0969	0.414277	0.905193
								0.097	0.039063	0.901051					0.097	0.414682	0.905098
								0.0971	0.0391052	0.900947					0.0971	0.415087	0.905003
								0.0972	0.0391474	0.900842					0.0972	0.415492	0.904908
								0.0973	0.0391896	0.900738					0.0973	0.415897	0.904814
								0.0974	0.0392317	0.900633					0.0974	0.416302	0.904719
								0.0975	0.0392739	0.900529					0.0975	0.416706	0.904624
								0.0976	0.0393161	0.900424					0.0976	0.417111	0.904529
								0.0977	0.0393583	0.90032					0.0977	0.417516	0.904434
								0.0978	0.0394006	0.900215					0.0978	0.41792	0.904339
								0.0979	0.0394428	0.900111					0.0979	0.418325	0.904244
								0.098	0.039485	0.900006					0.098	0.418729	0.904149
								0.0981	0.0395272	0.899902					0.0981	0.419134	0.904054
								0.0982	0.0395694	0.899797					0.0982	0.419538	0.903959
								0.0983	0.0396117	0.899692					0.0983	0.419942	0.903865
								0.0984	0.0396539	0.899588					0.0984	0.420346	0.90377
								0.0985	0.0396961	0.899483					0.0985	0.420751	0.903675
								0.0986	0.0397384	0.899379					0.0986	0.421155	0.90358
								0.0987	0.0397806	0.899274					0.0987	0.421559	0.903485
								0.0988	0.0398229	0.899169					0.0988	0.421963	0.90339
								0.0989	0.0398652	0.899065					0.0989	0.422367	0.903296
								0.099	0.0399074	0.89896					0.099	0.422771	0.903201
								0.0991	0.0399497	0.898856					0.0991	0.423174	0.903106
								0.0992	0.039992	0.898751					0.0992	0.423578	0.903011
								0.0993	0.0400343	0.898646					0.0993	0.423982	0.902916
								0.0994	0.0400765	0.898542					0.0994	0.424386	0.902822
								0.0995	0.0401188	0.898437					0.0995	0.424789	0.902727
								0.0996	0.0401611	0.898332					0.0996	0.425193	0.902632
								0.0997	0.0402034	0.898228					0.0997	0.425596	0.902537
								0.0998	0.0402457	0.898123					0.0998	0.426	0.902443
								0.0999	0.040288	0.898018					0.0999	0.426403	0.902348
								0.1	0.0403303	0.897914					0.1	0.426806	0.902253
								0.1001	0.0403727	0.897809					0.1001	0.42721	0.902158
								0.1002	0.040415	0.897704					0.1002	0.427613	0.902064
								0.1003	0.0404573	0.8976					0.1003	0.428016	0.901969
								0.1004	0.0404996	0.897495					0.1004	0.428419	0.901874
								0.1005	0.040542	0.89739					0.1005	0.428822	0.90178
								0.1006	0.0405843	0.897286					0.1006	0.429225	0.901685
								0.1007	0.0406267	0.897181					0.1007	0.429628	0.90159
								0.1008	0.040669	0.897076					0.1008	0.430031	0.901496
								0.1009	0.0407114	0.896971					0.1009	0.430433	0.901401
								0.101	0.0407537	0.896867					0.101	0.430836	0.901306
								0.1011	0.0407961	0.896762					0.1011	0.431239	0.901212
								0.1012	0.0408385	0.896657					0.1012	0.431642	0.901117
								0.1013	0.0408809	0.896552					0.1013	0.432044	0.901022
								0.1014	0.0409232	0.896448					0.1014	0.432447	0.900928
								0.1015	0.0409656	0.896343					0.1015	0.432849	0.900833
								0.1016	0.041008	0.896238					0.1016	0.433251	0.900739
								0.1017	0.0410504	0.896133					0.1017	0.433654	0.900644
								0.1018	0.0410928	0.896028					0.1018	0.434056	0.900549
								0.1019	0.0411352	0.895924					0.1019	0.434458	0.900455
								0.102	0.0411776	0.895819					0.102	0.43486	0.90036
								0.1021	0.0412201	0.895714					0.1021	0.435263	0.900266
								0.1022	0.0412625	0.895609					0.1022	0.435665	0.900171
								0.1023	0.0413049	0.895504					0.1023	0.436067	0.900077
								0.1024	0.0413473	0.8954					0.1024	0.436469	0.899982
								0.1025	0.0413898	0.895295					0.1025	0.43687	0.899887
								0.1026	0.0414322	0.89519					0.1026	0.437272	0.899793
								0.1027	0.0414746	0.895085					0.1027	0.437674	0.899698
								0.1028	0.0415171	0.89498					0.1028	0.438076	0.899604
								0.1029	0.0415596	0.894875					0.1029	0.438477	0.899509
								0.103	0.041602	0.89477					0.103	0.438879	0.899415
								0.1031	0.0416445	0.894666					0.1031	0.43928	0.89932
								0.1032	0.0416869	0.894561					0.1032	0.439682	0.899226
								0.1033	0.0417294	0.894456					0.1033	0.440083	0.899131
								0.1034	0.0417719	0.894351					0.1034	0.440485	0.899037
								0.1035	0.0418144	0.894246					0.1035	0.440886	0.898943
								0.1036	0.0418569	0.894141					0.1036	0.441287	0.898848
								0.1037	0.0418994	0.894036					0.1037	0.441688	0.898754
								0.1038	0.0419419	0.893931					0.1038	0.442089	0.898659
								0.1039	0.0419844	0.893826					0.1039	0.442491	0.898565
								0.104	0.0420269	0.893722					0.104	0.442892	0.89847
								0.1041	0.0420694	0.893617					0.1041	0.443292	0.898376
								0.1042	0.0421119	0.893512					0.1042	0.443693	0.898282
								0.1043	0.0421544	0.893407					0.1043	0.444094	0.898187
								0.1044	0.042197	0.893302					0.1044	0.444495	0.898093
								0.1045	0.0422395	0.893197					0.1045	0.444896	0.897998
								0.1046	0.042282	0.893092					0.1046	0.445296	0.897904
								0.1047	0.0423246	0.892987					0.1047	0.445697	0.89781
								0.1048	0.0423671	0.892882					0.1048	0.446097	0.897715
								0.1049	0.0424097	0.892777					0.1049	0.446498	0.897621
								0.105	0.0424522	0.892672					0.105	0.446898	0.897527
								0.1051	0.0424948	0.892567					0.1051	0.447299	0.897432
								0.1052	0.0425374	0.892462					0.1052	0.447699	0.897338
								0.1053	0.0425799	0.892357					0.1053	0.448099	0.897244
								0.1054	0.0426225	0.892252					0.1054	0.448499	0.897149
								0.1055	0.0426651	0.892147					0.1055	0.4489	0.897055
								0.1056	0.0427077	0.892042					0.1056	0.4493	0.896961
								0.1057	0.0427503	0.891937					0.1057	0.4497	0.896866
								0.1058	0.0427929	0.891832					0.1058	0.4501	0.896772
								0.1059	0.0428355	0.891727					0.1059	0.450499	0.896678
								0.106	0.0428781	0.891622					0.106	0.450899	0.896584
								0.1061	0.0429207	0.891517					0.1061	0.451299	0.896489
								0.1062	0.0429633	0.891411					0.1062	0.451699	0.896395
								0.1063	0.0430059	0.891306					0.1063	0.452098	0.896301
								0.1064	0.0430486	0.891201					0.1064	0.452498	0.896207
								0.1065	0.0430912	0.891096					0.1065	0.452898	0.896112
								0.1066	0.0431338	0.890991					0.1066	0.453297	0.896018
								0.1067	0.0431765	0.890886					0.1067	0.453696	0.895924
								0.1068	0.0432191	0.890781					0.1068	0.454096	0.89583
								0.1069	0.0432618	0.890676					0.1069	0.454495	0.895736
								0.107	0.0433044	0.890571					0.107	0.454894	0.895641
								0.1071	0.0433471	0.890466					0.1071	0.455293	0.895547
								0.1072	0.0433898	0.89036					0.1072	0.455693	0.895453
								0.1073	0.0434325	0.890255					0.1073	0.456092	0.895359
								0.1074	0.0434751	0.89015					0.1074	0.456491	0.895265
								0.1075	0.0435178	0.890045					0.1075	0.45689	0.895171
								0.1076	0.0435605	0.88994					0.1076	0.457288	0.895076
								0.1077	0.0436032	0.889835					0.1077	0.457687	0.894982
								0.1078	0.0436459	0.88973					0.1078	0.458086	0.894888
								0.1079	0.0436886	0.889624					0.1079	0.458485	0.894794
								0.108	0.0437313	0.889519					0.108	0.458883	0.8947
								0.1081	0.043774	0.889414					0.1081	0.459282	0.894606
								0.1082	0.0438167	0.889309					0.1082	0.459681	0.894512
								0.1083	0.0438595	0.889204					0.1083	0.460079	0.894418
								0.1084	0.0439022	0.889098					0.1084	0.460477	0.894324
								0.1085	0.0439449	0.888993					0.1085	0.460876	0.89423
								0.1086	0.0439877	0.888888					0.1086	0.461274	0.894136
								0.1087	0.0440304	0.888783					0.1087	0.461672	0.894042
								0.1088	0.0440732	0.888677					0.1088	0.46207	0.893947
								0.1089	0.0441159	0.888572					0.1089	0.462469	0.893853
								0.109	0.0441587	0.888467					0.109	0.462867	0.893759
								0.1091	0.0442014	0.888362					0.1091	0.463265	0.893665
								0.1092	0.0442442	0.888256					0.1092	0.463662	0.893571
								0.1093	0.044287	0.888151					0.1093	0.46406	0.893477
								0.1094	0.0443297	0.888046					0.1094	0.464458	0.893383
								0.1095	0.0443725	0.887941					0.1095	0.464856	0.893289
								0.1096	0.0444153	0.887835					0.1096	0.465254	0.893195
								0.1097	0.0444581	0.88773					0.1097	0.465651	0.893102
								0.1098	0.0445009	0.887625					0.1098	0.466049	0.893008
								0.1099	0.0445437	0.887519					0.1099	0.466446	0.892914
								0.11	0.0445865	0.887414					0.11	0.466844	0.89282
								0.1101	0.0446293	0.887309					0.1101	0.467241	0.892726
								0.1102	0.0446722	0.887204					0.1102	0.467638	0.892632
								0.1103	0.044715	0.887098					0.1103	0.468036	0.892538
								0.1104	0.0447578	0.886993					0.1104	0.468433	0.892444
								0.1105	0.0448007	0.886887					0.1105	0.46883	0.89235
								0.1106	0.0448435	0.886782					0.1106	0.469227	0.892256
								0.1107	0.0448863	0.886677					0.1107	0.469624	0.892162
								0.1108	0.0449292	0.886571					0.1108	0.470021	0.892068
								0.1109	0.044972	0.886466					0.1109	0.470418	0.891975
								0.111	0.0450149	0.886361					0.111	0.470815	0.891881
								0.1111	0.0450578	0.886255					0.1111	0.471212	0.891787
								0.1112	0.0451006	0.88615					0.1112	0.471608	0.891693
								0.1113	0.0451435	0.886045					0.1113	0.472005	0.891599
								0.1114	0.0451864	0.885939					0.1114	0.472402	0.891505
								0.1115	0.0452293	0.885834					0.1115	0.472798	0.891412
								0.1116	0.0452722	0.885728					0.1116	0.473195	0.891318
								0.1117	0.0453151	0.885623					0.1117	0.473591	0.891224
								0.1118	0.045358	0.885517					0.1118	0.473987	0.89113
								0.1119	0.0454009	0.885412					0.1119	0.474384	0.891036
								0.112	0.0454438	0.885307					0.112	0.47478	0.890943
								0.1121	0.0454867	0.885201					0.1121	0.475176	0.890849
								0.1122	0.0455296	0.885096					0.1122	0.475572	0.890755
								0.1123	0.0455726	0.88499					0.1123	0.475968	0.890661
								0.1124	0.0456155	0.884885					0.1124	0.476364	0.890567
								0.1125	0.0456584	0.884779					0.1125	0.47676	0.890474
								0.1126	0.0457014	0.884674					0.1126	0.477156	0.89038
								0.1127	0.0457443	0.884568					0.1127	0.477552	0.890286
								0.1128	0.0457873	0.884463					0.1128	0.477948	0.890193
								0.1129	0.0458302	0.884357					0.1129	0.478343	0.890099
								0.113	0.0458732	0.884252					0.113	0.478739	0.890005
								0.1131	0.0459162	0.884146					0.1131	0.479135	0.889912
								0.1132	0.0459591	0.884041					0.1132	0.47953	0.889818
								0.1133	0.0460021	0.883935					0.1133	0.479926	0.889724
								0.1134	0.0460451	0.88383					0.1134	0.480321	0.88963
								0.1135	0.0460881	0.883724					0.1135	0.480716	0.889537
								0.1136	0.0461311	0.883619					0.1136	0.481111	0.889443
								0.1137	0.0461741	0.883513					0.1137	0.481507	0.88935
								0.1138	0.0462171	0.883407					0.1138	0.481902	0.889256
								0.1139	0.0462601	0.883302					0.1139	0.482297	0.889162
								0.114	0.0463031	0.883196					0.114	0.482692	0.889069
								0.1141	0.0463461	0.883091					0.1141	0.483087	0.888975
								0.1142	0.0463892	0.882985					0.1142	0.483482	0.888881
								0.1143	0.0464322	0.88288					0.1143	0.483877	0.888788
								0.1144	0.0464752	0.882774					0.1144	0.484271	0.888694
								0.1145	0.0465183	0.882668					0.1145	0.484666	0.888601
								0.1146	0.0465613	0.882563					0.1146	0.485061	0.888507
								0.1147	0.0466044	0.882457					0.1147	0.485455	0.888414
								0.1148	0.0466474	0.882351					0.1148	0.48585	0.88832
								0.1149	0.0466905	0.882246					0.1149	0.486244	0.888227
								0.115	0.0467336	0.88214					0.115	0.486639	0.888133
								0.1151	0.0467766	0.882035					0.1151	0.487033	0.888039
								0.1152	0.0468197	0.881929					0.1152	0.487427	0.887946
								0.1153	0.0468628	0.881823					0.1153	0.487822	0.887852
								0.1154	0.0469059	0.881718					0.1154	0.488216	0.887759
								0.1155	0.046949	0.881612					0.1155	0.48861	0.887665
								0.1156	0.0469921	0.881506					0.1156	0.489004	0.887572
								0.1157	0.0470352	0.881401					0.1157	0.489398	0.887479
								0.1158	0.0470783	0.881295					0.1158	0.489792	0.887385
								0.1159	0.0471214	0.881189					0.1159	0.490186	0.887292
								0.116	0.0471645	0.881083					0.116	0.490579	0.887198
								0.1161	0.0472077	0.880978					0.1161	0.490973	0.887105
								0.1162	0.0472508	0.880872					0.1162	0.491367	0.887011
								0.1163	0.0472939	0.880766					0.1163	0.49176	0.886918
								0.1164	0.0473371	0.880661					0.1164	0.492154	0.886824
								0.1165	0.0473802	0.880555					0.1165	0.492547	0.886731
								0.1166	0.0474234	0.880449					0.1166	0.492941	0.886638
								0.1167	0.0474665	0.880343					0.1167	0.493334	0.886544
								0.1168	0.0475097	0.880238					0.1168	0.493727	0.886451
								0.1169	0.0475529	0.880132					0.1169	0.494121	0.886358
								0.117	0.047596	0.880026					0.117	0.494514	0.886264
								0.1171	0.0476392	0.87992					0.1171	0.494907	0.886171
								0.1172	0.0476824	0.879814					0.1172	0.4953	0.886077
								0.1173	0.0477256	0.879709					0.1173	0.495693	0.885984
								0.1174	0.0477688	0.879603					0.1174	0.496086	0.885891
								0.1175	0.047812	0.879497					0.1175	0.496479	0.885797
								0.1176	0.0478552	0.879391					0.1176	0.496871	0.885704
								0.1177	0.0478984	0.879285					0.1177	0.497264	0.885611
								0.1178	0.0479416	0.87918					0.1178	0.497657	0.885518
								0.1179	0.0479848	0.879074					0.1179	0.498049	0.885424
								0.118	0.0480281	0.878968					0.118	0.498442	0.885331
								0.1181	0.0480713	0.878862					0.1181	0.498834	0.885238
								0.1182	0.0481145	0.878756					0.1182	0.499227	0.885145
								0.1183	0.0481578	0.87865					0.1183	0.499619	0.885051
								0.1184	0.048201	0.878544					0.1184	0.500011	0.884958
								0.1185	0.0482443	0.878439					0.1185	0.500404	0.884865
								0.1186	0.0482875	0.878333					0.1186	0.500796	0.884772
								0.1187	0.0483308	0.878227					0.1187	0.501188	0.884678
								0.1188	0.0483741	0.878121					0.1188	0.50158	0.884585
								0.1189	0.0484173	0.878015					0.1189	0.501972	0.884492
								0.119	0.0484606	0.877909					0.119	0.502364	0.884399
								0.1191	0.0485039	0.877803					0.1191	0.502756	0.884306
								0.1192	0.0485472	0.877697					0.1192	0.503148	0.884212
								0.1193	0.0485905	0.877591					0.1193	0.503539	0.884119
								0.1194	0.0486338	0.877485					0.1194	0.503931	0.884026
								0.1195	0.0486771	0.877379					0.1195	0.504323	0.883933
								0.1196	0.0487204	0.877273					0.1196	0.504714	0.88384
								0.1197	0.0487637	0.877168					0.1197	0.505106	0.883747
								0.1198	0.0488071	0.877062					0.1198	0.505497	0.883654
								0.1199	0.0488504	0.876956					0.1199	0.505888	0.88356
								0.12	0.0488937	0.87685					0.12	0.50628	0.883467
								0.1201	0.0489371	0.876744					0.1201	0.506671	0.883374
								0.1202	0.0489804	0.876638					0.1202	0.507062	0.883281
								0.1203	0.0490238	0.876532					0.1203	0.507453	0.883188
								0.1204	0.0490671	0.876426					0.1204	0.507844	0.883095
								0.1205	0.0491105	0.87632					0.1205	0.508235	0.883002
								0.1206	0.0491538	0.876214					0.1206	0.508626	0.882909
								0.1207	0.0491972	0.876108					0.1207	0.509017	0.882816
								0.1208	0.0492406	0.876002					0.1208	0.509408	0.882723
								0.1209	0.049284	0.875896					0.1209	0.509798	0.88263
								0.121	0.0493274	0.875789					0.121	0.510189	0.882537
								0.1211	0.0493707	0.875683					0.1211	0.51058	0.882444
								0.1212	0.0494141	0.875577					0.1212	0.51097	0.882351
								0.1213	0.0494575	0.875471					0.1213	0.51136	0.882258
								0.1214	0.049501	0.875365					0.1214	0.511751	0.882165
								0.1215	0.0495444	0.875259					0.1215	0.512141	0.882072
								0.1216	0.0495878	0.875153					0.1216	0.512531	0.881979
								0.1217	0.0496312	0.875047					0.1217	0.512922	0.881886
								0.1218	0.0496746	0.874941					0.1218	0.513312	0.881793
								0.1219	0.0497181	0.874835					0.1219	0.513702	0.8817
								0.122	0.0497615	0.874729					0.122	0.514092	0.881607
								0.1221	0.049805	0.874623					0.1221	0.514482	0.881514
								0.1222	0.0498484	0.874516					0.1222	0.514872	0.881421
								0.1223	0.0498919	0.87441					0.1223	0.515262	0.881328
								0.1224	0.0499353	0.874304					0.1224	0.515651	0.881235
								0.1225	0.0499788	0.874198					0.1225	0.516041	0.881142
								0.1226	0.0500223	0.874092					0.1226	0.516431	0.88105
								0.1227	0.0500658	0.873986					0.1227	0.51682	0.880957
								0.1228	0.0501093	0.87388					0.1228	0.51721	0.880864
								0.1229	0.0501527	0.873773					0.1229	0.517599	0.880771
								0.123	0.0501962	0.873667					0.123	0.517989	0.880678
								0.1231	0.0502397	0.873561					0.1231	0.518378	0.880585
								0.1232	0.0502833	0.873455					0.1232	0.518767	0.880493
								0.1233	0.0503268	0.873349					0.1233	0.519156	0.8804
								0.1234	0.0503703	0.873242					0.1234	0.519545	0.880307
								0.1235	0.0504138	0.873136					0.1235	0.519934	0.880214
								0.1236	0.0504573	0.87303					0.1236	0.520323	0.880121
								0.1237	0.0505009	0.872924					0.1237	0.520712	0.880028
								0.1238	0.0505444	0.872817					0.1238	0.521101	0.879936
								0.1239	0.050588	0.872711					0.1239	0.52149	0.879843
								0.124	0.0506315	0.872605					0.124	0.521879	0.87975
								0.1241	0.0506751	0.872499					0.1241	0.522267	0.879657
								0.1242	0.0507186	0.872392					0.1242	0.522656	0.879565
								0.1243	0.0507622	0.872286					0.1243	0.523045	0.879472
								0.1244	0.0508058	0.87218					0.1244	0.523433	0.879379
								0.1245	0.0508494	0.872074					0.1245	0.523822	0.879287
								0.1246	0.0508929	0.871967					0.1246	0.52421	0.879194
								0.1247	0.0509365	0.871861					0.1247	0.524598	0.879101
								0.1248	0.0509801	0.871755					0.1248	0.524986	0.879008
								0.1249	0.0510237	0.871648					0.1249	0.525375	0.878916
								0.125	0.0510673	0.871542					0.125	0.525763	0.878823
								0.1251	0.0511109	0.871436					0.1251	0.526151	0.87873
								0.1252	0.0511546	0.871329					0.1252	0.526539	0.878638
								0.1253	0.0511982	0.871223					0.1253	0.526926	0.878545
								0.1254	0.0512418	0.871117					0.1254	0.527314	0.878453
								0.1255	0.0512854	0.87101					0.1255	0.527702	0.87836
								0.1256	0.0513291	0.870904					0.1256	0.52809	0.878267
								0.1257	0.0513727	0.870798					0.1257	0.528477	0.878175
								0.1258	0.0514164	0.870691					0.1258	0.528865	0.878082
								0.1259	0.05146	0.870585					0.1259	0.529253	0.87799
								0.126	0.0515037	0.870479					0.126	0.52964	0.877897
								0.1261	0.0515474	0.870372					0.1261	0.530027	0.877804
								0.1262	0.051591	0.870266					0.1262	0.530415	0.877712
								0.1263	0.0516347	0.870159					0.1263	0.530802	0.877619
								0.1264	0.0516784	0.870053					0.1264	0.531189	0.877527
								0.1265	0.0517221	0.869946					0.1265	0.531576	0.877434
								0.1266	0.0517658	0.86984					0.1266	0.531963	0.877342
								0.1267	0.0518095	0.869734					0.1267	0.53235	0.877249
								0.1268	0.0518532	0.869627					0.1268	0.532737	0.877157
								0.1269	0.0518969	0.869521					0.1269	0.533124	0.877064
								0.127	0.0519406	0.869414					0.127	0.533511	0.876972
								0.1271	0.0519844	0.869308					0.1271	0.533898	0.876879
								0.1272	0.0520281	0.869201					0.1272	0.534284	0.876787
								0.1273	0.0520718	0.869095					0.1273	0.534671	0.876694
								0.1274	0.0521156	0.868988					0.1274	0.535057	0.876602
								0.1275	0.0521593	0.868882					0.1275	0.535444	0.876509
								0.1276	0.0522031	0.868775					0.1276	0.53583	0.876417
								0.1277	0.0522468	0.868669					0.1277	0.536217	0.876324
								0.1278	0.0522906	0.868562					0.1278	0.536603	0.876232
								0.1279	0.0523343	0.868456					0.1279	0.536989	0.87614
								0.128	0.0523781	0.868349					0.128	0.537375	0.876047
								0.1281	0.0524219	0.868243					0.1281	0.537761	0.875955
								0.1282	0.0524657	0.868136					0.1282	0.538147	0.875862
								0.1283	0.0525095	0.86803					0.1283	0.538533	0.87577
								0.1284	0.0525533	0.867923					0.1284	0.538919	0.875678
								0.1285	0.0525971	0.867817					0.1285	0.539305	0.875585
								0.1286	0.0526409	0.86771					0.1286	0.539691	0.875493
								0.1287	0.0526847	0.867603					0.1287	0.540076	0.875401
								0.1288	0.0527285	0.867497					0.1288	0.540462	0.875308
								0.1289	0.0527723	0.86739					0.1289	0.540847	0.875216
								0.129	0.0528162	0.867284					0.129	0.541233	0.875124
								0.1291	0.05286	0.867177					0.1291	0.541618	0.875031
								0.1292	0.0529038	0.86707					0.1292	0.542004	0.874939
								0.1293	0.0529477	0.866964					0.1293	0.542389	0.874847
								0.1294	0.0529915	0.866857					0.1294	0.542774	0.874755
								0.1295	0.0530354	0.866751					0.1295	0.543159	0.874662
								0.1296	0.0530793	0.866644					0.1296	0.543544	0.87457
								0.1297	0.0531231	0.866537					0.1297	0.543929	0.874478
								0.1298	0.053167	0.866431					0.1298	0.544314	0.874386
								0.1299	0.0532109	0.866324					0.1299	0.544699	0.874293
								0.13	0.0532548	0.866217					0.13	0.545084	0.874201
								0.1301	0.0532987	0.866111					0.1301	0.545469	0.874109
								0.1302	0.0533426	0.866004					0.1302	0.545854	0.874017
								0.1303	0.0533865	0.865897					0.1303	0.546238	0.873925
								0.1304	0.0534304	0.86579					0.1304	0.546623	0.873832
								0.1305	0.0534743	0.865684					0.1305	0.547007	0.87374
								0.1306	0.0535182	0.865577					0.1306	0.547392	0.873648
								0.1307	0.0535621	0.86547					0.1307	0.547776	0.873556
								0.1308	0.0536061	0.865364					0.1308	0.54816	0.873464
								0.1309	0.05365	0.865257					0.1309	0.548545	0.873372
								0.131	0.053694	0.86515					0.131	0.548929	0.873279
								0.1311	0.0537379	0.865043					0.1311	0.549313	0.873187
								0.1312	0.0537819	0.864937					0.1312	0.549697	0.873095
								0.1313	0.0538258	0.86483					0.1313	0.550081	0.873003
								0.1314	0.0538698	0.864723					0.1314	0.550465	0.872911
								0.1315	0.0539138	0.864616					0.1315	0.550849	0.872819
								0.1316	0.0539577	0.86451					0.1316	0.551232	0.872727
								0.1317	0.0540017	0.864403					0.1317	0.551616	0.872635
								0.1318	0.0540457	0.864296					0.1318	0.552	0.872543
								0.1319	0.0540897	0.864189					0.1319	0.552383	0.872451
								0.132	0.0541337	0.864082					0.132	0.552767	0.872359
								0.1321	0.0541777	0.863976					0.1321	0.55315	0.872267
								0.1322	0.0542217	0.863869					0.1322	0.553533	0.872175
								0.1323	0.0542657	0.863762					0.1323	0.553917	0.872083
								0.1324	0.0543098	0.863655					0.1324	0.5543	0.871991
								0.1325	0.0543538	0.863548					0.1325	0.554683	0.871899
								0.1326	0.0543978	0.863441					0.1326	0.555066	0.871807
								0.1327	0.0544419	0.863334					0.1327	0.555449	0.871715
								0.1328	0.0544859	0.863228					0.1328	0.555832	0.871623
								0.1329	0.05453	0.863121					0.1329	0.556215	0.871531
								0.133	0.054574	0.863014					0.133	0.556598	0.871439
								0.1331	0.0546181	0.862907					0.1331	0.556981	0.871347
								0.1332	0.0546622	0.8628					0.1332	0.557363	0.871255
								0.1333	0.0547062	0.862693					0.1333	0.557746	0.871163
								0.1334	0.0547503	0.862586					0.1334	0.558129	0.871071
								0.1335	0.0547944	0.862479					0.1335	0.558511	0.870979
								0.1336	0.0548385	0.862372					0.1336	0.558894	0.870887
								0.1337	0.0548826	0.862265					0.1337	0.559276	0.870795
								0.1338	0.0549267	0.862159					0.1338	0.559658	0.870704
								0.1339	0.0549708	0.862052					0.1339	0.56004	0.870612
								0.134	0.0550149	0.861945					0.134	0.560423	0.87052
								0.1341	0.0550591	0.861838					0.1341	0.560805	0.870428
								0.1342	0.0551032	0.861731					0.1342	0.561187	0.870336
								0.1343	0.0551473	0.861624					0.1343	0.561569	0.870244
								0.1344	0.0551915	0.861517					0.1344	0.561951	0.870153
								0.1345	0.0552356	0.86141					0.1345	0.562332	0.870061
								0.1346	0.0552798	0.861303					0.1346	0.562714	0.869969
								0.1347	0.0553239	0.861196					0.1347	0.563096	0.869877
								0.1348	0.0553681	0.861089					0.1348	0.563477	0.869785
								0.1349	0.0554123	0.860982					0.1349	0.563859	0.869694
								0.135	0.0554564	0.860875					0.135	0.56424	0.869602
								0.1351	0.0555006	0.860768					0.1351	0.564622	0.86951
								0.1352	0.0555448	0.860661					0.1352	0.565003	0.869418
								0.1353	0.055589	0.860554					0.1353	0.565385	0.869327
								0.1354	0.0556332	0.860446					0.1354	0.565766	0.869235
								0.1355	0.0556774	0.860339					0.1355	0.566147	0.869143
								0.1356	0.0557216	0.860232					0.1356	0.566528	0.869052
								0.1357	0.0557658	0.860125					0.1357	0.566909	0.86896
								0.1358	0.05581	0.860018					0.1358	0.56729	0.868868
								0.1359	0.0558543	0.859911					0.1359	0.567671	0.868777
								0.136	0.0558985	0.859804					0.136	0.568052	0.868685
								0.1361	0.0559427	0.859697					0.1361	0.568432	0.868593
								0.1362	0.055987	0.85959					0.1362	0.568813	0.868502
								0.1363	0.0560312	0.859483					0.1363	0.569194	0.86841
								0.1364	0.0560755	0.859376					0.1364	0.569574	0.868318
								0.1365	0.0561197	0.859268					0.1365	0.569955	0.868227
								0.1366	0.056164	0.859161					0.1366	0.570335	0.868135
								0.1367	0.0562083	0.859054					0.1367	0.570715	0.868044
								0.1368	0.0562526	0.858947					0.1368	0.571096	0.867952
								0.1369	0.0562969	0.85884					0.1369	0.571476	0.86786
								0.137	0.0563412	0.858733					0.137	0.571856	0.867769
								0.1371	0.0563854	0.858625					0.1371	0.572236	0.867677
								0.1372	0.0564298	0.858518					0.1372	0.572616	0.867586
								0.1373	0.0564741	0.858411					0.1373	0.572996	0.867494
								0.1374	0.0565184	0.858304					0.1374	0.573376	0.867403
								0.1375	0.0565627	0.858197					0.1375	0.573756	0.867311
								0.1376	0.056607	0.858089					0.1376	0.574135	0.86722
								0.1377	0.0566514	0.857982					0.1377	0.574515	0.867128
								0.1378	0.0566957	0.857875					0.1378	0.574895	0.867037
								0.1379	0.05674	0.857768					0.1379	0.575274	0.866945
								0.138	0.0567844	0.85766					0.138	0.575653	0.866854
								0.1381	0.0568288	0.857553					0.1381	0.576033	0.866762
								0.1382	0.0568731	0.857446					0.1382	0.576412	0.866671
								0.1383	0.0569175	0.857339					0.1383	0.576791	0.866579
								0.1384	0.0569619	0.857231					0.1384	0.577171	0.866488
								0.1385	0.0570062	0.857124					0.1385	0.57755	0.866396
								0.1386	0.0570506	0.857017					0.1386	0.577929	0.866305
								0.1387	0.057095	0.85691					0.1387	0.578308	0.866214
								0.1388	0.0571394	0.856802					0.1388	0.578687	0.866122
								0.1389	0.0571838	0.856695					0.1389	0.579065	0.866031
								0.139	0.0572282	0.856588					0.139	0.579444	0.865939
								0.1391	0.0572726	0.85648					0.1391	0.579823	0.865848
								0.1392	0.0573171	0.856373					0.1392	0.580201	0.865757
								0.1393	0.0573615	0.856266					0.1393	0.58058	0.865665
								0.1394	0.0574059	0.856158					0.1394	0.580959	0.865574
								0.1395	0.0574504	0.856051					0.1395	0.581337	0.865483
								0.1396	0.0574948	0.855944					0.1396	0.581715	0.865391
								0.1397	0.0575393	0.855836					0.1397	0.582094	0.8653
								0.1398	0.0575837	0.855729					0.1398	0.582472	0.865209
								0.1399	0.0576282	0.855621					0.1399	0.58285	0.865117
								0.14	0.0576727	0.855514					0.14	0.583228	0.865026
								0.1401	0.0577171	0.855407					0.1401	0.583606	0.864935
								0.1402	0.0577616	0.855299					0.1402	0.583984	0.864844
								0.1403	0.0578061	0.855192					0.1403	0.584362	0.864752
								0.1404	0.0578506	0.855084					0.1404	0.58474	0.864661
								0.1405	0.0578951	0.854977					0.1405	0.585117	0.86457
								0.1406	0.0579396	0.85487					0.1406	0.585495	0.864479
								0.1407	0.0579841	0.854762					0.1407	0.585873	0.864388
								0.1408	0.0580286	0.854655					0.1408	0.58625	0.864296
								0.1409	0.0580732	0.854547					0.1409	0.586628	0.864205
								0.141	0.0581177	0.85444					0.141	0.587005	0.864114
								0.1411	0.0581622	0.854332					0.1411	0.587382	0.864023
								0.1412	0.0582068	0.854225					0.1412	0.587759	0.863932
								0.1413	0.0582513	0.854117					0.1413	0.588137	0.86384
								0.1414	0.0582959	0.85401					0.1414	0.588514	0.863749
								0.1415	0.0583404	0.853902					0.1415	0.588891	0.863658
								0.1416	0.058385	0.853795					0.1416	0.589268	0.863567
								0.1417	0.0584296	0.853687					0.1417	0.589645	0.863476
								0.1418	0.0584742	0.85358					0.1418	0.590021	0.863385
								0.1419	0.0585187	0.853472					0.1419	0.590398	0.863294
								0.142	0.0585633	0.853365					0.142	0.590775	0.863203
								0.1421	0.0586079	0.853257					0.1421	0.591152	0.863112
								0.1422	0.0586525	0.85315					0.1422	0.591528	0.86302
								0.1423	0.0586971	0.853042					0.1423	0.591905	0.862929
								0.1424	0.0587417	0.852934					0.1424	0.592281	0.862838
								0.1425	0.0587864	0.852827					0.1425	0.592657	0.862747
								0.1426	0.058831	0.852719					0.1426	0.593034	0.862656
								0.1427	0.0588756	0.852612					0.1427	0.59341	0.862565
								0.1428	0.0589203	0.852504					0.1428	0.593786	0.862474
								0.1429	0.0589649	0.852396					0.1429	0.594162	0.862383
								0.143	0.0590096	0.852289					0.143	0.594538	0.862292
								0.1431	0.0590542	0.852181					0.1431	0.594914	0.862201
								0.1432	0.0590989	0.852074					0.1432	0.59529	0.86211
								0.1433	0.0591436	0.851966					0.1433	0.595666	0.862019
								0.1434	0.0591882	0.851858					0.1434	0.596041	0.861928
								0.1435	0.0592329	0.851751					0.1435	0.596417	0.861837
								0.1436	0.0592776	0.851643					0.1436	0.596792	0.861747
								0.1437	0.0593223	0.851535					0.1437	0.597168	0.861656
								0.1438	0.059367	0.851428					0.1438	0.597543	0.861565
								0.1439	0.0594117	0.85132					0.1439	0.597919	0.861474
								0.144	0.0594564	0.851212					0.144	0.598294	0.861383
								0.1441	0.0595011	0.851105					0.1441	0.598669	0.861292
								0.1442	0.0595459	0.850997					0.1442	0.599044	0.861201
								0.1443	0.0595906	0.850889					0.1443	0.599419	0.86111
								0.1444	0.0596353	0.850782					0.1444	0.599794	0.861019
								0.1445	0.0596801	0.850674					0.1445	0.600169	0.860929
								0.1446	0.0597248	0.850566					0.1446	0.600544	0.860838
								0.1447	0.0597696	0.850458					0.1447	0.600919	0.860747
								0.1448	0.0598143	0.850351					0.1448	0.601294	0.860656
								0.1449	0.0598591	0.850243					0.1449	0.601668	0.860565
								0.145	0.0599039	0.850135					0.145	0.602043	0.860475
								0.1451	0.0599486	0.850027					0.1451	0.602418	0.860384
								0.1452	0.0599934	0.849919					0.1452	0.602792	0.860293
								0.1453	0.0600382	0.849812					0.1453	0.603166	0.860202
								0.1454	0.060083	0.849704					0.1454	0.603541	0.860111
								0.1455	0.0601278	0.849596					0.1455	0.603915	0.860021
								0.1456	0.0601726	0.849488					0.1456	0.604289	0.85993
								0.1457	0.0602175	0.84938					0.1457	0.604663	0.859839
								0.1458	0.0602623	0.849273					0.1458	0.605037	0.859749
								0.1459	0.0603071	0.849165					0.1459	0.605411	0.859658
								0.146	0.0603519	0.849057					0.146	0.605785	0.859567
								0.1461	0.0603968	0.848949					0.1461	0.606159	0.859477
								0.1462	0.0604416	0.848841					0.1462	0.606533	0.859386
								0.1463	0.0604865	0.848733					0.1463	0.606906	0.859295
								0.1464	0.0605313	0.848626					0.1464	0.60728	0.859205
								0.1465	0.0605762	0.848518					0.1465	0.607653	0.859114
								0.1466	0.0606211	0.84841					0.1466	0.608027	0.859023
								0.1467	0.060666	0.848302					0.1467	0.6084	0.858933
								0.1468	0.0607108	0.848194					0.1468	0.608774	0.858842
								0.1469	0.0607557	0.848086					0.1469	0.609147	0.858751
								0.147	0.0608006	0.847978					0.147	0.60952	0.858661
								0.1471	0.0608455	0.84787					0.1471	0.609893	0.85857
								0.1472	0.0608904	0.847762					0.1472	0.610266	0.85848
								0.1473	0.0609354	0.847654					0.1473	0.610639	0.858389
								0.1474	0.0609803	0.847546					0.1474	0.611012	0.858299
								0.1475	0.0610252	0.847439					0.1475	0.611385	0.858208
								0.1476	0.0610701	0.847331					0.1476	0.611758	0.858117
								0.1477	0.0611151	0.847223					0.1477	0.61213	0.858027
								0.1478	0.06116	0.847115					0.1478	0.612503	0.857936
								0.1479	0.061205	0.847007					0.1479	0.612875	0.857846
								0.148	0.0612499	0.846899					0.148	0.613248	0.857755
								0.1481	0.0612949	0.846791					0.1481	0.61362	0.857665
								0.1482	0.0613399	0.846683					0.1482	0.613993	0.857574
								0.1483	0.0613848	0.846575					0.1483	0.614365	0.857484
								0.1484	0.0614298	0.846467					0.1484	0.614737	0.857394
								0.1485	0.0614748	0.846359					0.1485	0.615109	0.857303
								0.1486	0.0615198	0.846251					0.1486	0.615481	0.857213
								0.1487	0.0615648	0.846143					0.1487	0.615853	0.857122
								0.1488	0.0616098	0.846034					0.1488	0.616225	0.857032
								0.1489	0.0616548	0.845926					0.1489	0.616597	0.856941
								0.149	0.0616999	0.845818					0.149	0.616969	0.856851
								0.1491	0.0617449	0.84571					0.1491	0.61734	0.856761
								0.1492	0.0617899	0.845602					0.1492	0.617712	0.85667
								0.1493	0.061835	0.845494					0.1493	0.618083	0.85658
								0.1494	0.06188	0.845386					0.1494	0.618455	0.85649
								0.1495	0.0619251	0.845278					0.1495	0.618826	0.856399
								0.1496	0.0619701	0.84517					0.1496	0.619198	0.856309
								0.1497	0.0620152	0.845062					0.1497	0.619569	0.856219
								0.1498	0.0620603	0.844954					0.1498	0.61994	0.856128
								0.1499	0.0621053	0.844845					0.1499	0.620311	0.856038
								0.15	0.0621504	0.844737					0.15	0.620682	0.855948
								0.1501	0.0621955	0.844629					0.1501	0.621053	0.855857
								0.1502	0.0622406	0.844521					0.1502	0.621424	0.855767
								0.1503	0.0622857	0.844413					0.1503	0.621795	0.855677
								0.1504	0.0623308	0.844305					0.1504	0.622166	0.855587
								0.1505	0.0623759	0.844196					0.1505	0.622536	0.855496
								0.1506	0.0624211	0.844088					0.1506	0.622907	0.855406
								0.1507	0.0624662	0.84398					0.1507	0.623277	0.855316
								0.1508	0.0625113	0.843872					0.1508	0.623648	0.855226
								0.1509	0.0625565	0.843764					0.1509	0.624018	0.855135
								0.151	0.0626016	0.843655					0.151	0.624389	0.855045
								0.1511	0.0626468	0.843547					0.1511	0.624759	0.854955
								0.1512	0.0626919	0.843439					0.1512	0.625129	0.854865
								0.1513	0.0627371	0.843331					0.1513	0.625499	0.854775
								0.1514	0.0627823	0.843223					0.1514	0.625869	0.854685
								0.1515	0.0628274	0.843114					0.1515	0.626239	0.854595
								0.1516	0.0628726	0.843006					0.1516	0.626609	0.854504
								0.1517	0.0629178	0.842898					0.1517	0.626979	0.854414
								0.1518	0.062963	0.842789					0.1518	0.627348	0.854324
								0.1519	0.0630082	0.842681					0.1519	0.627718	0.854234
								0.152	0.0630534	0.842573					0.152	0.628088	0.854144
								0.1521	0.0630987	0.842465					0.1521	0.628457	0.854054
								0.1522	0.0631439	0.842356					0.1522	0.628827	0.853964
								0.1523	0.0631891	0.842248					0.1523	0.629196	0.853874
								0.1524	0.0632343	0.84214					0.1524	0.629565	0.853784
								0.1525	0.0632796	0.842031					0.1525	0.629935	0.853694
								0.1526	0.0633248	0.841923					0.1526	0.630304	0.853604
								0.1527	0.0633701	0.841815					0.1527	0.630673	0.853514
								0.1528	0.0634154	0.841706					0.1528	0.631042	0.853424
								0.1529	0.0634606	0.841598					0.1529	0.631411	0.853334
								0.153	0.0635059	0.84149					0.153	0.63178	0.853244
								0.1531	0.0635512	0.841381					0.1531	0.632148	0.853154
								0.1532	0.0635965	0.841273					0.1532	0.632517	0.853064
								0.1533	0.0636418	0.841164					0.1533	0.632886	0.852974
								0.1534	0.0636871	0.841056					0.1534	0.633254	0.852884
								0.1535	0.0637324	0.840948					0.1535	0.633623	0.852794
								0.1536	0.0637777	0.840839					0.1536	0.633991	0.852704
								0.1537	0.063823	0.840731					0.1537	0.63436	0.852614
								0.1538	0.0638683	0.840622					0.1538	0.634728	0.852524
								0.1539	0.0639137	0.840514					0.1539	0.635096	0.852434
								0.154	0.063959	0.840405					0.154	0.635464	0.852344
								0.1541	0.0640043	0.840297					0.1541	0.635832	0.852255
								0.1542	0.0640497	0.840188					0.1542	0.6362	0.852165
								0.1543	0.0640951	0.84008					0.1543	0.636568	0.852075
								0.1544	0.0641404	0.839972					0.1544	0.636936	0.851985
								0.1545	0.0641858	0.839863					0.1545	0.637304	0.851895
								0.1546	0.0642312	0.839755					0.1546	0.637672	0.851805
								0.1547	0.0642765	0.839646					0.1547	0.638039	0.851716
								0.1548	0.0643219	0.839538					0.1548	0.638407	0.851626
								0.1549	0.0643673	0.839429					0.1549	0.638774	0.851536
								0.155	0.0644127	0.83932					0.155	0.639142	0.851446
								0.1551	0.0644581	0.839212					0.1551	0.639509	0.851356
								0.1552	0.0645036	0.839103					0.1552	0.639876	0.851267
								0.1553	0.064549	0.838995					0.1553	0.640243	0.851177
								0.1554	0.0645944	0.838886					0.1554	0.640611	0.851087
								0.1555	0.0646399	0.838778					0.1555	0.640978	0.850997
								0.1556	0.0646853	0.838669					0.1556	0.641345	0.850908
								0.1557	0.0647307	0.838561					0.1557	0.641712	0.850818
								0.1558	0.0647762	0.838452					0.1558	0.642078	0.850728
								0.1559	0.0648217	0.838343					0.1559	0.642445	0.850639
								0.156	0.0648671	0.838235					0.156	0.642812	0.850549
								0.1561	0.0649126	0.838126					0.1561	0.643178	0.850459
								0.1562	0.0649581	0.838018					0.1562	0.643545	0.85037
								0.1563	0.0650036	0.837909					0.1563	0.643911	0.85028
								0.1564	0.0650491	0.8378					0.1564	0.644278	0.85019
								0.1565	0.0650946	0.837692					0.1565	0.644644	0.850101
								0.1566	0.0651401	0.837583					0.1566	0.64501	0.850011
								0.1567	0.0651856	0.837474					0.1567	0.645376	0.849922
								0.1568	0.0652311	0.837366					0.1568	0.645743	0.849832
								0.1569	0.0652766	0.837257					0.1569	0.646109	0.849742
								0.157	0.0653222	0.837148					0.157	0.646474	0.849653
								0.1571	0.0653677	0.83704					0.1571	0.64684	0.849563
								0.1572	0.0654133	0.836931					0.1572	0.647206	0.849474
								0.1573	0.0654588	0.836822					0.1573	0.647572	0.849384
								0.1574	0.0655044	0.836714					0.1574	0.647937	0.849295
								0.1575	0.0655499	0.836605					0.1575	0.648303	0.849205
								0.1576	0.0655955	0.836496					0.1576	0.648669	0.849116
								0.1577	0.0656411	0.836387					0.1577	0.649034	0.849026
								0.1578	0.0656867	0.836279					0.1578	0.649399	0.848937
								0.1579	0.0657323	0.83617					0.1579	0.649765	0.848847
								0.158	0.0657779	0.836061					0.158	0.65013	0.848758
								0.1581	0.0658235	0.835952					0.1581	0.650495	0.848668
								0.1582	0.0658691	0.835844					0.1582	0.65086	0.848579
								0.1583	0.0659147	0.835735					0.1583	0.651225	0.848489
								0.1584	0.0659603	0.835626					0.1584	0.65159	0.8484
								0.1585	0.0660059	0.835517					0.1585	0.651955	0.848311
								0.1586	0.0660516	0.835408					0.1586	0.652319	0.848221
								0.1587	0.0660972	0.8353					0.1587	0.652684	0.848132
								0.1588	0.0661429	0.835191					0.1588	0.653049	0.848042
								0.1589	0.0661885	0.835082					0.1589	0.653413	0.847953
								0.159	0.0662342	0.834973					0.159	0.653778	0.847864
								0.1591	0.0662799	0.834864					0.1591	0.654142	0.847774
								0.1592	0.0663255	0.834755					0.1592	0.654506	0.847685
								0.1593	0.0663712	0.834646					0.1593	0.654871	0.847596
								0.1594	0.0664169	0.834538					0.1594	0.655235	0.847506
								0.1595	0.0664626	0.834429					0.1595	0.655599	0.847417
								0.1596	0.0665083	0.83432					0.1596	0.655963	0.847328
								0.1597	0.066554	0.834211					0.1597	0.656327	0.847238
								0.1598	0.0665998	0.834102					0.1598	0.656691	0.847149
								0.1599	0.0666455	0.833993					0.1599	0.657054	0.84706
								0.16	0.0666912	0.833884					0.16	0.657418	0.846971
								0.1601	0.0667369	0.833775					0.1601	0.657782	0.846881
								0.1602	0.0667827	0.833666					0.1602	0.658145	0.846792
								0.1603	0.0668284	0.833557					0.1603	0.658509	0.846703
								0.1604	0.0668742	0.833448					0.1604	0.658872	0.846614
								0.1605	0.06692	0.83334					0.1605	0.659236	0.846525
								0.1606	0.0669657	0.833231					0.1606	0.659599	0.846435
								0.1607	0.0670115	0.833122					0.1607	0.659962	0.846346
								0.1608	0.0670573	0.833013					0.1608	0.660325	0.846257
								0.1609	0.0671031	0.832904					0.1609	0.660688	0.846168
								0.161	0.0671489	0.832795					0.161	0.661051	0.846079
								0.1611	0.0671947	0.832686					0.1611	0.661414	0.84599
								0.1612	0.0672405	0.832577					0.1612	0.661777	0.845901
								0.1613	0.0672863	0.832468					0.1613	0.66214	0.845811
								0.1614	0.0673321	0.832359					0.1614	0.662502	0.845722
								0.1615	0.067378	0.83225					0.1615	0.662865	0.845633
								0.1616	0.0674238	0.83214					0.1616	0.663227	0.845544
								0.1617	0.0674696	0.832031					0.1617	0.66359	0.845455
								0.1618	0.0675155	0.831922					0.1618	0.663952	0.845366
								0.1619	0.0675613	0.831813					0.1619	0.664314	0.845277
								0.162	0.0676072	0.831704					0.162	0.664677	0.845188
								0.1621	0.0676531	0.831595					0.1621	0.665039	0.845099
								0.1622	0.067699	0.831486					0.1622	0.665401	0.84501
								0.1623	0.0677448	0.831377					0.1623	0.665763	0.844921
								0.1624	0.0677907	0.831268					0.1624	0.666125	0.844832
								0.1625	0.0678366	0.831159					0.1625	0.666487	0.844743
								0.1626	0.0678825	0.83105					0.1626	0.666848	0.844654
								0.1627	0.0679284	0.83094					0.1627	0.66721	0.844565
								0.1628	0.0679744	0.830831					0.1628	0.667572	0.844476
								0.1629	0.0680203	0.830722					0.1629	0.667933	0.844387
								0.163	0.0680662	0.830613					0.163	0.668295	0.844298
								0.1631	0.0681121	0.830504					0.1631	0.668656	0.844209
								0.1632	0.0681581	0.830395					0.1632	0.669017	0.84412
								0.1633	0.068204	0.830285					0.1633	0.669379	0.844031
								0.1634	0.06825	0.830176					0.1634	0.66974	0.843943
								0.1635	0.068296	0.830067					0.1635	0.670101	0.843854
								0.1636	0.0683419	0.829958					0.1636	0.670462	0.843765
								0.1637	0.0683879	0.829849					0.1637	0.670823	0.843676
								0.1638	0.0684339	0.829739					0.1638	0.671184	0.843587
								0.1639	0.0684799	0.82963					0.1639	0.671544	0.843498
								0.164	0.0685259	0.829521					0.164	0.671905	0.84341
								0.1641	0.0685719	0.829412					0.1641	0.672266	0.843321
								0.1642	0.0686179	0.829303					0.1642	0.672626	0.843232
								0.1643	0.0686639	0.829193					0.1643	0.672987	0.843143
								0.1644	0.0687099	0.829084					0.1644	0.673347	0.843054
								0.1645	0.068756	0.828975					0.1645	0.673708	0.842966
								0.1646	0.068802	0.828865					0.1646	0.674068	0.842877
								0.1647	0.0688481	0.828756					0.1647	0.674428	0.842788
								0.1648	0.0688941	0.828647					0.1648	0.674788	0.842699
								0.1649	0.0689402	0.828538					0.1649	0.675148	0.842611
								0.165	0.0689862	0.828428					0.165	0.675508	0.842522
								0.1651	0.0690323	0.828319					0.1651	0.675868	0.842433
								0.1652	0.0690784	0.82821					0.1652	0.676228	0.842345
								0.1653	0.0691245	0.8281					0.1653	0.676587	0.842256
								0.1654	0.0691706	0.827991					0.1654	0.676947	0.842167
								0.1655	0.0692167	0.827882					0.1655	0.677307	0.842079
								0.1656	0.0692628	0.827772					0.1656	0.677666	0.84199
								0.1657	0.0693089	0.827663					0.1657	0.678026	0.841901
								0.1658	0.069355	0.827553					0.1658	0.678385	0.841813
								0.1659	0.0694011	0.827444					0.1659	0.678744	0.841724
								0.166	0.0694473	0.827335					0.166	0.679103	0.841635
								0.1661	0.0694934	0.827225					0.1661	0.679462	0.841547
								0.1662	0.0695396	0.827116					0.1662	0.679821	0.841458
								0.1663	0.0695857	0.827006					0.1663	0.68018	0.84137
								0.1664	0.0696319	0.826897					0.1664	0.680539	0.841281
								0.1665	0.069678	0.826788					0.1665	0.680898	0.841193
								0.1666	0.0697242	0.826678					0.1666	0.681257	0.841104
								0.1667	0.0697704	0.826569					0.1667	0.681615	0.841016
								0.1668	0.0698166	0.826459					0.1668	0.681974	0.840927
								0.1669	0.0698628	0.82635					0.1669	0.682333	0.840839
								0.167	0.069909	0.82624					0.167	0.682691	0.84075
								0.1671	0.0699552	0.826131					0.1671	0.683049	0.840662
								0.1672	0.0700014	0.826021					0.1672	0.683408	0.840573
								0.1673	0.0700476	0.825912					0.1673	0.683766	0.840485
								0.1674	0.0700939	0.825802					0.1674	0.684124	0.840396
								0.1675	0.0701401	0.825693					0.1675	0.684482	0.840308
								0.1676	0.0701863	0.825583					0.1676	0.68484	0.840219
								0.1677	0.0702326	0.825474					0.1677	0.685198	0.840131
								0.1678	0.0702788	0.825364					0.1678	0.685556	0.840043
								0.1679	0.0703251	0.825255					0.1679	0.685913	0.839954
								0.168	0.0703714	0.825145					0.168	0.686271	0.839866
								0.1681	0.0704177	0.825035					0.1681	0.686629	0.839777
								0.1682	0.0704639	0.824926					0.1682	0.686986	0.839689
								0.1683	0.0705102	0.824816					0.1683	0.687343	0.839601
								0.1684	0.0705565	0.824707					0.1684	0.687701	0.839512
								0.1685	0.0706028	0.824597					0.1685	0.688058	0.839424
								0.1686	0.0706491	0.824487					0.1686	0.688415	0.839336
								0.1687	0.0706955	0.824378					0.1687	0.688772	0.839247
								0.1688	0.0707418	0.824268					0.1688	0.689129	0.839159
								0.1689	0.0707881	0.824159					0.1689	0.689486	0.839071
								0.169	0.0708345	0.824049					0.169	0.689843	0.838983
								0.1691	0.0708808	0.823939					0.1691	0.6902	0.838894
								0.1692	0.0709272	0.82383					0.1692	0.690557	0.838806
								0.1693	0.0709735	0.82372					0.1693	0.690913	0.838718
								0.1694	0.0710199	0.82361					0.1694	0.69127	0.83863
								0.1695	0.0710663	0.823501					0.1695	0.691627	0.838541
								0.1696	0.0711127	0.823391					0.1696	0.691983	0.838453
								0.1697	0.071159	0.823281					0.1697	0.692339	0.838365
								0.1698	0.0712054	0.823172					0.1698	0.692696	0.838277
								0.1699	0.0712518	0.823062					0.1699	0.693052	0.838189
								0.17	0.0712982	0.822952					0.17	0.693408	0.838101
								0.1701	0.0713447	0.822842					0.1701	0.693764	0.838012
								0.1702	0.0713911	0.822733					0.1702	0.69412	0.837924
								0.1703	0.0714375	0.822623					0.1703	0.694476	0.837836
								0.1704	0.071484	0.822513					0.1704	0.694832	0.837748
								0.1705	0.0715304	0.822403					0.1705	0.695187	0.83766
								0.1706	0.0715768	0.822294					0.1706	0.695543	0.837572
								0.1707	0.0716233	0.822184					0.1707	0.695898	0.837484
								0.1708	0.0716698	0.822074					0.1708	0.696254	0.837396
								0.1709	0.0717162	0.821964					0.1709	0.696609	0.837308
								0.171	0.0717627	0.821854					0.171	0.696965	0.83722
								0.1711	0.0718092	0.821745					0.1711	0.69732	0.837132
								0.1712	0.0718557	0.821635					0.1712	0.697675	0.837044
								0.1713	0.0719022	0.821525					0.1713	0.69803	0.836956
								0.1714	0.0719487	0.821415					0.1714	0.698385	0.836868
								0.1715	0.0719952	0.821305					0.1715	0.69874	0.83678
								0.1716	0.0720417	0.821195					0.1716	0.699095	0.836692
								0.1717	0.0720883	0.821086					0.1717	0.69945	0.836604
								0.1718	0.0721348	0.820976					0.1718	0.699805	0.836516
								0.1719	0.0721813	0.820866					0.1719	0.700159	0.836428
								0.172	0.0722279	0.820756					0.172	0.700514	0.83634
								0.1721	0.0722745	0.820646					0.1721	0.700868	0.836252
								0.1722	0.072321	0.820536					0.1722	0.701223	0.836164
								0.1723	0.0723676	0.820426					0.1723	0.701577	0.836076
								0.1724	0.0724142	0.820316					0.1724	0.701931	0.835988
								0.1725	0.0724607	0.820206					0.1725	0.702285	0.8359
								0.1726	0.0725073	0.820097					0.1726	0.70264	0.835813
								0.1727	0.0725539	0.819987					0.1727	0.702994	0.835725
								0.1728	0.0726005	0.819877					0.1728	0.703348	0.835637
								0.1729	0.0726472	0.819767					0.1729	0.703701	0.835549
								0.173	0.0726938	0.819657					0.173	0.704055	0.835461
								0.1731	0.0727404	0.819547					0.1731	0.704409	0.835373
								0.1732	0.072787	0.819437					0.1732	0.704762	0.835286
								0.1733	0.0728337	0.819327					0.1733	0.705116	0.835198
								0.1734	0.0728803	0.819217					0.1734	0.705469	0.83511
								0.1735	0.072927	0.819107					0.1735	0.705823	0.835022
								0.1736	0.0729736	0.818997					0.1736	0.706176	0.834935
								0.1737	0.0730203	0.818887					0.1737	0.706529	0.834847
								0.1738	0.073067	0.818777					0.1738	0.706883	0.834759
								0.1739	0.0731137	0.818667					0.1739	0.707236	0.834671
								0.174	0.0731604	0.818557					0.174	0.707589	0.834584
								0.1741	0.0732071	0.818447					0.1741	0.707942	0.834496
								0.1742	0.0732538	0.818336					0.1742	0.708294	0.834408
								0.1743	0.0733005	0.818226					0.1743	0.708647	0.834321
								0.1744	0.0733472	0.818116					0.1744	0.709	0.834233
								0.1745	0.0733939	0.818006					0.1745	0.709352	0.834145
								0.1746	0.0734407	0.817896					0.1746	0.709705	0.834058
								0.1747	0.0734874	0.817786					0.1747	0.710057	0.83397
								0.1748	0.0735341	0.817676					0.1748	0.71041	0.833882
								0.1749	0.0735809	0.817566					0.1749	0.710762	0.833795
								0.175	0.0736277	0.817456					0.175	0.711114	0.833707
								0.1751	0.0736744	0.817346					0.1751	0.711466	0.83362
								0.1752	0.0737212	0.817235					0.1752	0.711818	0.833532
								0.1753	0.073768	0.817125					0.1753	0.71217	0.833445
								0.1754	0.0738148	0.817015					0.1754	0.712522	0.833357
								0.1755	0.0738616	0.816905					0.1755	0.712874	0.833269
								0.1756	0.0739084	0.816795					0.1756	0.713226	0.833182
								0.1757	0.0739552	0.816684					0.1757	0.713578	0.833094
								0.1758	0.074002	0.816574					0.1758	0.713929	0.833007
								0.1759	0.0740488	0.816464					0.1759	0.714281	0.832919
								0.176	0.0740957	0.816354					0.176	0.714632	0.832832
								0.1761	0.0741425	0.816244					0.1761	0.714983	0.832745
								0.1762	0.0741893	0.816133					0.1762	0.715335	0.832657
								0.1763	0.0742362	0.816023					0.1763	0.715686	0.83257
								0.1764	0.0742831	0.815913					0.1764	0.716037	0.832482
								0.1765	0.0743299	0.815803					0.1765	0.716388	0.832395
								0.1766	0.0743768	0.815692					0.1766	0.716739	0.832307
								0.1767	0.0744237	0.815582					0.1767	0.71709	0.83222
								0.1768	0.0744706	0.815472					0.1768	0.717441	0.832133
								0.1769	0.0745175	0.815362					0.1769	0.717791	0.832045
								0.177	0.0745644	0.815251					0.177	0.718142	0.831958
								0.1771	0.0746113	0.815141					0.1771	0.718492	0.831871
								0.1772	0.0746582	0.815031					0.1772	0.718843	0.831783
								0.1773	0.0747051	0.81492					0.1773	0.719193	0.831696
								0.1774	0.0747521	0.81481					0.1774	0.719544	0.831609
								0.1775	0.074799	0.8147					0.1775	0.719894	0.831521
								0.1776	0.074846	0.814589					0.1776	0.720244	0.831434
								0.1777	0.0748929	0.814479					0.1777	0.720594	0.831347
								0.1778	0.0749399	0.814369					0.1778	0.720944	0.831259
								0.1779	0.0749869	0.814258					0.1779	0.721294	0.831172
								0.178	0.0750338	0.814148					0.178	0.721644	0.831085
								0.1781	0.0750808	0.814037					0.1781	0.721994	0.830998
								0.1782	0.0751278	0.813927					0.1782	0.722343	0.830911
								0.1783	0.0751748	0.813817					0.1783	0.722693	0.830823
								0.1784	0.0752218	0.813706					0.1784	0.723042	0.830736
								0.1785	0.0752688	0.813596					0.1785	0.723392	0.830649
								0.1786	0.0753158	0.813485					0.1786	0.723741	0.830562
								0.1787	0.0753629	0.813375					0.1787	0.72409	0.830475
								0.1788	0.0754099	0.813264					0.1788	0.72444	0.830388
								0.1789	0.0754569	0.813154					0.1789	0.724789	0.8303
								0.179	0.075504	0.813044					0.179	0.725138	0.830213
								0.1791	0.0755511	0.812933					0.1791	0.725487	0.830126
								0.1792	0.0755981	0.812823					0.1792	0.725836	0.830039
								0.1793	0.0756452	0.812712					0.1793	0.726184	0.829952
								0.1794	0.0756923	0.812602					0.1794	0.726533	0.829865
								0.1795	0.0757393	0.812491					0.1795	0.726882	0.829778
								0.1796	0.0757864	0.812381					0.1796	0.72723	0.829691
								0.1797	0.0758335	0.81227					0.1797	0.727579	0.829604
								0.1798	0.0758807	0.81216					0.1798	0.727927	0.829517
								0.1799	0.0759278	0.812049					0.1799	0.728276	0.82943
								0.18	0.0759749	0.811938					0.18	0.728624	0.829343
								0.1801	0.076022	0.811828					0.1801	0.728972	0.829256
								0.1802	0.0760692	0.811717					0.1802	0.72932	0.829169
								0.1803	0.0761163	0.811607					0.1803	0.729668	0.829082
								0.1804	0.0761634	0.811496					0.1804	0.730016	0.828995
								0.1805	0.0762106	0.811386					0.1805	0.730364	0.828908
								0.1806	0.0762578	0.811275					0.1806	0.730712	0.828821
								0.1807	0.0763049	0.811164					0.1807	0.731059	0.828734
								0.1808	0.0763521	0.811054					0.1808	0.731407	0.828647
								0.1809	0.0763993	0.810943					0.1809	0.731754	0.82856
								0.181	0.0764465	0.810833					0.181	0.732102	0.828473
								0.1811	0.0764937	0.810722					0.1811	0.732449	0.828386
								0.1812	0.0765409	0.810611					0.1812	0.732796	0.8283
								0.1813	0.0765881	0.810501					0.1813	0.733144	0.828213
								0.1814	0.0766354	0.81039					0.1814	0.733491	0.828126
								0.1815	0.0766826	0.810279					0.1815	0.733838	0.828039
								0.1816	0.0767298	0.810169					0.1816	0.734185	0.827952
								0.1817	0.0767771	0.810058					0.1817	0.734532	0.827865
								0.1818	0.0768243	0.809947					0.1818	0.734878	0.827779
								0.1819	0.0768716	0.809836					0.1819	0.735225	0.827692
								0.182	0.0769189	0.809726					0.182	0.735572	0.827605
								0.1821	0.0769661	0.809615					0.1821	0.735918	0.827518
								0.1822	0.0770134	0.809504					0.1822	0.736265	0.827432
								0.1823	0.0770607	0.809394					0.1823	0.736611	0.827345
								0.1824	0.077108	0.809283					0.1824	0.736958	0.827258
								0.1825	0.0771553	0.809172					0.1825	0.737304	0.827171
								0.1826	0.0772026	0.809061					0.1826	0.73765	0.827085
								0.1827	0.07725	0.80895					0.1827	0.737996	0.826998
								0.1828	0.0772973	0.80884					0.1828	0.738342	0.826911
								0.1829	0.0773446	0.808729					0.1829	0.738688	0.826825
								0.183	0.077392	0.808618					0.183	0.739034	0.826738
								0.1831	0.0774393	0.808507					0.1831	0.739379	0.826651
								0.1832	0.0774867	0.808396					0.1832	0.739725	0.826565
								0.1833	0.077534	0.808286					0.1833	0.740071	0.826478
								0.1834	0.0775814	0.808175					0.1834	0.740416	0.826391
								0.1835	0.0776288	0.808064					0.1835	0.740762	0.826305
								0.1836	0.0776762	0.807953					0.1836	0.741107	0.826218
								0.1837	0.0777236	0.807842					0.1837	0.741452	0.826132
								0.1838	0.077771	0.807731					0.1838	0.741797	0.826045
								0.1839	0.0778184	0.80762					0.1839	0.742143	0.825959
								0.184	0.0778658	0.80751					0.184	0.742488	0.825872
								0.1841	0.0779132	0.807399					0.1841	0.742832	0.825786
								0.1842	0.0779607	0.807288					0.1842	0.743177	0.825699
								0.1843	0.0780081	0.807177					0.1843	0.743522	0.825613
								0.1844	0.0780555	0.807066					0.1844	0.743867	0.825526
								0.1845	0.078103	0.806955					0.1845	0.744211	0.82544
								0.1846	0.0781505	0.806844					0.1846	0.744556	0.825353
								0.1847	0.0781979	0.806733					0.1847	0.7449	0.825267
								0.1848	0.0782454	0.806622					0.1848	0.745245	0.82518
								0.1849	0.0782929	0.806511					0.1849	0.745589	0.825094
								0.185	0.0783404	0.8064					0.185	0.745933	0.825007
								0.1851	0.0783879	0.806289					0.1851	0.746277	0.824921
								0.1852	0.0784354	0.806178					0.1852	0.746621	0.824835
								0.1853	0.0784829	0.806067					0.1853	0.746965	0.824748
								0.1854	0.0785304	0.805956					0.1854	0.747309	0.824662
								0.1855	0.0785779	0.805845					0.1855	0.747653	0.824576
								0.1856	0.0786255	0.805734					0.1856	0.747997	0.824489
								0.1857	0.078673	0.805623					0.1857	0.74834	0.824403
								0.1858	0.0787206	0.805512					0.1858	0.748684	0.824317
								0.1859	0.0787681	0.805401					0.1859	0.749027	0.82423
								0.186	0.0788157	0.80529					0.186	0.749371	0.824144
								0.1861	0.0788633	0.805179					0.1861	0.749714	0.824058
								0.1862	0.0789109	0.805068					0.1862	0.750057	0.823971
								0.1863	0.0789585	0.804957					0.1863	0.750401	0.823885
								0.1864	0.079006	0.804846					0.1864	0.750744	0.823799
								0.1865	0.0790537	0.804735					0.1865	0.751087	0.823713
								0.1866	0.0791013	0.804624					0.1866	0.751429	0.823627
								0.1867	0.0791489	0.804512					0.1867	0.751772	0.82354
								0.1868	0.0791965	0.804401					0.1868	0.752115	0.823454
								0.1869	0.0792441	0.80429					0.1869	0.752458	0.823368
								0.187	0.0792918	0.804179					0.187	0.7528	0.823282
								0.1871	0.0793394	0.804068					0.1871	0.753143	0.823196
								0.1872	0.0793871	0.803957					0.1872	0.753485	0.823109
								0.1873	0.0794348	0.803846					0.1873	0.753827	0.823023
								0.1874	0.0794824	0.803734					0.1874	0.75417	0.822937
								0.1875	0.0795301	0.803623					0.1875	0.754512	0.822851
								0.1876	0.0795778	0.803512					0.1876	0.754854	0.822765
								0.1877	0.0796255	0.803401					0.1877	0.755196	0.822679
								0.1878	0.0796732	0.80329					0.1878	0.755538	0.822593
								0.1879	0.0797209	0.803178					0.1879	0.75588	0.822507
								0.188	0.0797686	0.803067					0.188	0.756221	0.822421
								0.1881	0.0798163	0.802956					0.1881	0.756563	0.822335
								0.1882	0.0798641	0.802845					0.1882	0.756905	0.822249
								0.1883	0.0799118	0.802733					0.1883	0.757246	0.822163
								0.1884	0.0799596	0.802622					0.1884	0.757588	0.822077
								0.1885	0.0800073	0.802511					0.1885	0.757929	0.821991
								0.1886	0.0800551	0.8024					0.1886	0.75827	0.821905
								0.1887	0.0801029	0.802288					0.1887	0.758611	0.821819
								0.1888	0.0801506	0.802177					0.1888	0.758953	0.821733
								0.1889	0.0801984	0.802066					0.1889	0.759294	0.821647
								0.189	0.0802462	0.801954					0.189	0.759634	0.821561
								0.1891	0.080294	0.801843					0.1891	0.759975	0.821475
								0.1892	0.0803418	0.801732					0.1892	0.760316	0.821389
								0.1893	0.0803896	0.80162					0.1893	0.760657	0.821303
								0.1894	0.0804375	0.801509					0.1894	0.760997	0.821217
								0.1895	0.0804853	0.801398					0.1895	0.761338	0.821132
								0.1896	0.0805331	0.801286					0.1896	0.761678	0.821046
								0.1897	0.080581	0.801175					0.1897	0.762019	0.82096
								0.1898	0.0806288	0.801064					0.1898	0.762359	0.820874
								0.1899	0.0806767	0.800952					0.1899	0.762699	0.820788
								0.19	0.0807246	0.800841					0.19	0.763039	0.820702
								0.1901	0.0807724	0.800729					0.1901	0.763379	0.820617
								0.1902	0.0808203	0.800618					0.1902	0.763719	0.820531
								0.1903	0.0808682	0.800506					0.1903	0.764059	0.820445
								0.1904	0.0809161	0.800395					0.1904	0.764399	0.820359
								0.1905	0.080964	0.800284					0.1905	0.764739	0.820274
								0.1906	0.081012	0.800172					0.1906	0.765078	0.820188
								0.1907	0.0810599	0.800061					0.1907	0.765418	0.820102
								0.1908	0.0811078	0.799949					0.1908	0.765757	0.820016
								0.1909	0.0811557	0.799838					0.1909	0.766096	0.819931
								0.191	0.0812037	0.799726					0.191	0.766436	0.819845
								0.1911	0.0812516	0.799615					0.1911	0.766775	0.819759
								0.1912	0.0812996	0.799503					0.1912	0.767114	0.819674
								0.1913	0.0813476	0.799392					0.1913	0.767453	0.819588
								0.1914	0.0813956	0.79928					0.1914	0.767792	0.819502
								0.1915	0.0814435	0.799169					0.1915	0.768131	0.819417
								0.1916	0.0814915	0.799057					0.1916	0.76847	0.819331
								0.1917	0.0815395	0.798946					0.1917	0.768808	0.819246
								0.1918	0.0815875	0.798834					0.1918	0.769147	0.81916
								0.1919	0.0816356	0.798722					0.1919	0.769485	0.819075
								0.192	0.0816836	0.798611					0.192	0.769824	0.818989
								0.1921	0.0817316	0.798499					0.1921	0.770162	0.818903
								0.1922	0.0817797	0.798388					0.1922	0.770501	0.818818
								0.1923	0.0818277	0.798276					0.1923	0.770839	0.818732
								0.1924	0.0818758	0.798165					0.1924	0.771177	0.818647
								0.1925	0.0819238	0.798053					0.1925	0.771515	0.818561
								0.1926	0.0819719	0.797941					0.1926	0.771853	0.818476
								0.1927	0.08202	0.79783					0.1927	0.772191	0.81839
								0.1928	0.0820681	0.797718					0.1928	0.772528	0.818305
								0.1929	0.0821161	0.797606					0.1929	0.772866	0.81822
								0.193	0.0821642	0.797495					0.193	0.773204	0.818134
								0.1931	0.0822124	0.797383					0.1931	0.773541	0.818049
								0.1932	0.0822605	0.797271					0.1932	0.773879	0.817963
								0.1933	0.0823086	0.79716					0.1933	0.774216	0.817878
								0.1934	0.0823567	0.797048					0.1934	0.774553	0.817792
								0.1935	0.0824049	0.796936					0.1935	0.774891	0.817707
								0.1936	0.082453	0.796825					0.1936	0.775228	0.817622
								0.1937	0.0825012	0.796713					0.1937	0.775565	0.817536
								0.1938	0.0825493	0.796601					0.1938	0.775902	0.817451
								0.1939	0.0825975	0.796489					0.1939	0.776239	0.817366
								0.194	0.0826457	0.796378					0.194	0.776575	0.81728
								0.1941	0.0826939	0.796266					0.1941	0.776912	0.817195
								0.1942	0.0827421	0.796154					0.1942	0.777249	0.81711
								0.1943	0.0827903	0.796042					0.1943	0.777585	0.817025
								0.1944	0.0828385	0.79593					0.1944	0.777922	0.816939
								0.1945	0.0828867	0.795819					0.1945	0.778258	0.816854
								0.1946	0.0829349	0.795707					0.1946	0.778594	0.816769
								0.1947	0.0829832	0.795595					0.1947	0.77893	0.816684
								0.1948	0.0830314	0.795483					0.1948	0.779267	0.816598
								0.1949	0.0830797	0.795371					0.1949	0.779603	0.816513
								0.195	0.0831279	0.79526					0.195	0.779938	0.816428
								0.1951	0.0831762	0.795148					0.1951	0.780274	0.816343
								0.1952	0.0832244	0.795036					0.1952	0.78061	0.816258
								0.1953	0.0832727	0.794924					0.1953	0.780946	0.816173
								0.1954	0.083321	0.794812					0.1954	0.781281	0.816088
								0.1955	0.0833693	0.7947					0.1955	0.781617	0.816002
								0.1956	0.0834176	0.794588					0.1956	0.781952	0.815917
								0.1957	0.0834659	0.794477					0.1957	0.782288	0.815832
								0.1958	0.0835143	0.794365					0.1958	0.782623	0.815747
								0.1959	0.0835626	0.794253					0.1959	0.782958	0.815662
								0.196	0.0836109	0.794141					0.196	0.783293	0.815577
								0.1961	0.0836593	0.794029					0.1961	0.783628	0.815492
								0.1962	0.0837076	0.793917					0.1962	0.783963	0.815407
								0.1963	0.083756	0.793805					0.1963	0.784298	0.815322
								0.1964	0.0838043	0.793693					0.1964	0.784633	0.815237
								0.1965	0.0838527	0.793581					0.1965	0.784967	0.815152
								0.1966	0.0839011	0.793469					0.1966	0.785302	0.815067
								0.1967	0.0839495	0.793357					0.1967	0.785637	0.814982
								0.1968	0.0839979	0.793245					0.1968	0.785971	0.814897
								0.1969	0.0840463	0.793133					0.1969	0.786305	0.814812
								0.197	0.0840947	0.793021					0.197	0.78664	0.814727
								0.1971	0.0841431	0.792909					0.1971	0.786974	0.814642
								0.1972	0.0841916	0.792797					0.1972	0.787308	0.814557
								0.1973	0.08424	0.792685					0.1973	0.787642	0.814472
								0.1974	0.0842884	0.792573					0.1974	0.787976	0.814388
								0.1975	0.0843369	0.792461					0.1975	0.78831	0.814303
								0.1976	0.0843854	0.792349					0.1976	0.788643	0.814218
								0.1977	0.0844338	0.792237					0.1977	0.788977	0.814133
								0.1978	0.0844823	0.792125					0.1978	0.789311	0.814048
								0.1979	0.0845308	0.792013					0.1979	0.789644	0.813963
								0.198	0.0845793	0.7919					0.198	0.789977	0.813879
								0.1981	0.0846278	0.791788					0.1981	0.790311	0.813794
								0.1982	0.0846763	0.791676					0.1982	0.790644	0.813709
								0.1983	0.0847248	0.791564					0.1983	0.790977	0.813624
								0.1984	0.0847733	0.791452					0.1984	0.79131	0.81354
								0.1985	0.0848219	0.79134					0.1985	0.791643	0.813455
								0.1986	0.0848704	0.791228					0.1986	0.791976	0.81337
								0.1987	0.084919	0.791115					0.1987	0.792309	0.813285
								0.1988	0.0849675	0.791003					0.1988	0.792642	0.813201
								0.1989	0.0850161	0.790891					0.1989	0.792974	0.813116
								0.199	0.0850647	0.790779					0.199	0.793307	0.813031
								0.1991	0.0851133	0.790667					0.1991	0.793639	0.812947
								0.1992	0.0851618	0.790555					0.1992	0.793972	0.812862
								0.1993	0.0852104	0.790442					0.1993	0.794304	0.812777
								0.1994	0.085259	0.79033					0.1994	0.794636	0.812693
								0.1995	0.0853077	0.790218					0.1995	0.794968	0.812608
								0.1996	0.0853563	0.790106					0.1996	0.7953	0.812524
								0.1997	0.0854049	0.789993					0.1997	0.795632	0.812439
[truncated: 8,003 more rows]

## Sheet: Fig3
						contour image data
phase separation due to water activity greater than 1			phase separation due to organic activity greater than 1			mole fraction of water (columns)	O:C (rows)	a_w matrix
mole fraction water	O:C value		mole fraction water	O:C value		0	0	0	0.0102819	0.0205693	0.0308624	0.041161	0.051465	0.0617746	0.0720896	0.08241	0.0927358	0.103067	0.113404	0.123745	0.134092	0.144445	0.154802	0.165165	0.175533	0.185906	0.196284	0.206667	0.217055	0.227448	0.237846	0.248249	0.258657	0.26907	0.279487	0.28991	0.300337	0.310769	0.321206	0.331647	0.342093	0.352543	0.362999	0.373458	0.383923	0.394391	0.404864	0.415342	0.425824
0.9832	0.0275		1	0.01		0.0005	0.0025	0	0.0089955	0.0179968	0.0270039	0.0360168	0.0450354	0.0540597	0.0630897	0.0721253	0.0811666	0.0902136	0.0992661	0.108324	0.117388	0.126457	0.135532	0.144612	0.153698	0.162789	0.171885	0.180987	0.190094	0.199207	0.208325	0.217448	0.226576	0.23571	0.244849	0.253993	0.263142	0.272297	0.281456	0.290621	0.29979	0.308965	0.318145	0.327329	0.336519	0.345714	0.354913	0.364118	0.373327
0.9832	0.025		1	0.0075		0.001	0.005	0	0.00799808	0.016002	0.0240116	0.032027	0.0400482	0.048075	0.0561076	0.0641459	0.0721898	0.0802394	0.0882946	0.0963554	0.104422	0.112494	0.120571	0.128654	0.136743	0.144837	0.152937	0.161042	0.169152	0.177268	0.18539	0.193516	0.201648	0.209786	0.217928	0.226077	0.23423	0.242389	0.250552	0.258721	0.266896	0.275075	0.28326	0.29145	0.299645	0.307845	0.31605	0.32426	0.332475
0.9832	0.03		1	0.0125		0.0015	0.0075	0	0.00720332	0.0144123	0.0216269	0.0288472	0.0360731	0.0433046	0.0505417	0.0577843	0.0650326	0.0722863	0.0795456	0.0868105	0.0940808	0.101357	0.108638	0.115925	0.123217	0.130514	0.137818	0.145126	0.15244	0.159759	0.167083	0.174413	0.181749	0.189089	0.196435	0.203786	0.211142	0.218504	0.22587	0.233242	0.24062	0.248002	0.255389	0.262782	0.27018	0.277583	0.284991	0.292404	0.299822
0.9831	0.0225		1	0.015		0.002	0.01	0	0.00655484	0.0131152	0.0196809	0.0262522	0.0328288	0.0394109	0.0459984	0.0525913	0.0591896	0.0657933	0.0724023	0.0790167	0.0856364	0.0922615	0.0988919	0.105528	0.112169	0.118815	0.125466	0.132123	0.138785	0.145452	0.152125	0.158802	0.165485	0.172173	0.178867	0.185565	0.192268	0.198977	0.205691	0.21241	0.219134	0.225863	0.232597	0.239336	0.24608	0.252829	0.259583	0.266342	0.273106
0.9831	0.0325		1	0.005		0.0025	0.0125	0	0.00601474	0.0120347	0.01806	0.0240904	0.0301261	0.036167	0.0422131	0.0482644	0.0543208	0.0603825	0.0664493	0.0725212	0.0785983	0.0846805	0.0907679	0.0968603	0.102958	0.109061	0.115168	0.121281	0.127399	0.133522	0.13965	0.145783	0.151921	0.158064	0.164212	0.170365	0.176523	0.182686	0.188854	0.195026	0.201204	0.207387	0.213575	0.219767	0.225964	0.232167	0.238374	0.244586	0.250803
0.9831	0.02		1	0.0175		0.003	0.015	0	0.00555683	0.0111187	0.0166855	0.0222574	0.0278342	0.0334161	0.0390029	0.0445946	0.0501914	0.055793	0.0613997	0.0670112	0.0726277	0.0782491	0.0838754	0.0895066	0.0951427	0.100784	0.10643	0.11208	0.117736	0.123396	0.129062	0.134732	0.140407	0.146086	0.151771	0.15746	0.163154	0.168853	0.174557	0.180266	0.185979	0.191697	0.197419	0.203147	0.208879	0.214616	0.220357	0.226103	0.231854
0.9831	0.035		1	0.0025		0.0035	0.0175	0	0.00516264	0.0103301	0.0155023	0.0206792	0.025861	0.0310474	0.0362387	0.0414346	0.0466353	0.0518407	0.0570509	0.0622657	0.0674853	0.0727095	0.0779385	0.0831721	0.0884104	0.0936534	0.098901	0.104153	0.10941	0.114672	0.119938	0.125209	0.130484	0.135764	0.141049	0.146338	0.151632	0.156931	0.162234	0.167541	0.172853	0.17817	0.183491	0.188817	0.194147	0.199482	0.204821	0.210165	0.215513
0.983	0.0375		1	0.02		0.004	0.02	0	0.00481886	0.00964227	0.0144702	0.0193027	0.0241397	0.0289813	0.0338273	0.0386779	0.043533	0.0483926	0.0532567	0.0581253	0.0629983	0.0678759	0.0727579	0.0776444	0.0825353	0.0874307	0.0923305	0.0972348	0.102144	0.107057	0.111974	0.116896	0.121823	0.126754	0.131689	0.136628	0.141572	0.146521	0.151473	0.156431	0.161392	0.166358	0.171328	0.176303	0.181281	0.186265	0.191252	0.196244	0.20124
0.983	0.0175		1	0.0225		0.0045	0.0225	0	0.00451569	0.0090357	0.01356	0.0180887	0.0226216	0.0271589	0.0317005	0.0362463	0.0407965	0.0453509	0.0499096	0.0544726	0.0590399	0.0636114	0.0681872	0.0727672	0.0773515	0.0819401	0.0865328	0.0911299	0.0957311	0.100337	0.104946	0.10956	0.114178	0.118801	0.123427	0.128058	0.132693	0.137332	0.141975	0.146622	0.151274	0.15593	0.16059	0.165254	0.169922	0.174594	0.179271	0.183951	0.188636
0.983	0.04		1	0		0.005	0.025	0	0.00424581	0.00849573	0.0127498	0.0170079	0.0212701	0.0255364	0.0298068	0.0340813	0.0383599	0.0426425	0.0469293	0.05122	0.0555149	0.0598138	0.0641168	0.0684238	0.0727349	0.07705	0.0813691	0.0856923	0.0900195	0.0943507	0.098686	0.103025	0.107369	0.111716	0.116067	0.120422	0.124782	0.129145	0.133512	0.137883	0.142259	0.146638	0.151021	0.155408	0.159799	0.164194	0.168593	0.172996	0.177403
0.9829	0.0425		1	0.025		0.0055	0.0275	0	0.00400364	0.00801119	0.0120226	0.016038	0.0200572	0.0240804	0.0281074	0.0321383	0.0361731	0.0402117	0.0442543	0.0483007	0.052351	0.0564051	0.0604631	0.064525	0.0685907	0.0726602	0.0767336	0.0808109	0.0848919	0.0889768	0.0930656	0.0971581	0.101255	0.105355	0.109459	0.113567	0.117678	0.121794	0.125913	0.130036	0.134163	0.138293	0.142428	0.146566	0.150708	0.154853	0.159003	0.163156	0.167313
0.9828	0.015		1	0.0275		0.006	0.03	0	0.00378488	0.00757347	0.0113658	0.0151618	0.0189615	0.0227649	0.026572	0.0303828	0.0341973	0.0380154	0.0418373	0.0456628	0.0494921	0.0533249	0.0571615	0.0610017	0.0648456	0.0686932	0.0725444	0.0763993	0.0802578	0.08412	0.0879858	0.0918553	0.0957284	0.0996051	0.103486	0.10737	0.111257	0.115148	0.119043	0.122942	0.126844	0.13075	0.134659	0.138572	0.142488	0.146408	0.150332	0.154259	0.15819
0.9828	0.045		1	0.03		0.0065	0.0325	0	0.00358612	0.00717577	0.010769	0.0143656	0.0179659	0.0215696	0.0251769	0.0287876	0.0324019	0.0360197	0.039641	0.0432657	0.046894	0.0505258	0.0541611	0.0577999	0.0614421	0.0650879	0.0687371	0.0723898	0.076046	0.0797057	0.0833688	0.0870354	0.0907055	0.094379	0.098056	0.101736	0.10542	0.109108	0.112798	0.116493	0.12019	0.123892	0.127596	0.131304	0.135016	0.13873	0.142449	0.14617	0.149895
0.9828	0.0475		0.999999	0.0325		0.007	0.035	0	0.00340467	0.00681269	0.0102241	0.0136388	0.0170569	0.0204783	0.023903	0.0273311	0.0307626	0.0341974	0.0376355	0.0410769	0.0445217	0.0479698	0.0514212	0.054876	0.0583341	0.0617955	0.0652602	0.0687282	0.0721995	0.0756742	0.0791521	0.0826334	0.0861179	0.0896058	0.0930969	0.0965914	0.100089	0.10359	0.107094	0.110602	0.114113	0.117627	0.121144	0.124665	0.128189	0.131716	0.135247	0.138781	0.142318
0.9827	0.05		0.999999	0.035		0.0075	0.0375	0	0.00323832	0.00647983	0.00972453	0.0129724	0.0162235	0.0194777	0.0227352	0.0259958	0.0292596	0.0325266	0.0357967	0.03907	0.0423465	0.0456262	0.048909	0.052195	0.0554841	0.0587764	0.0620719	0.0653705	0.0686723	0.0719772	0.0752853	0.0785965	0.0819108	0.0852284	0.088549	0.0918728	0.0951997	0.0985298	0.101863	0.105199	0.108539	0.111881	0.115227	0.118576	0.121928	0.125283	0.128641	0.132002	0.135367
0.9826	0.0125		0.999999	0.0375		0.008	0.04	0	0.00308528	0.00617359	0.00926494	0.0123593	0.0154567	0.0185572	0.0216607	0.0247672	0.0278767	0.0309892	0.0341048	0.0372234	0.040345	0.0434696	0.0465972	0.0497279	0.0528616	0.0559982	0.0591379	0.0622806	0.0654263	0.068575	0.0717267	0.0748814	0.0780391	0.0811998	0.0843634	0.0875301	0.0906998	0.0938724	0.0970481	0.100227	0.103408	0.106593	0.10978	0.112971	0.116164	0.119361	0.12256	0.125763	0.128968
0.9826	0.0525		0.999999	0.0825		0.0085	0.0425	0	0.00294404	0.00589098	0.0088408	0.0117935	0.0147491	0.0177076	0.020669	0.0236332	0.0266003	0.0295703	0.0325432	0.035519	0.0384976	0.0414791	0.0444635	0.0474508	0.0504409	0.0534339	0.0564297	0.0594285	0.06243	0.0654345	0.0684418	0.071452	0.074465	0.0774809	0.0804996	0.0835212	0.0865456	0.0895729	0.0926031	0.095636	0.0986719	0.101711	0.104752	0.107796	0.110844	0.113894	0.116946	0.120002	0.123061
0.9825	0.055		0.999999	0.08		0.009	0.045	0	0.00281335	0.00562946	0.00844831	0.0112699	0.0140943	0.0169214	0.0197512	0.0225838	0.0254192	0.0282573	0.0310981	0.0339417	0.036788	0.039637	0.0424888	0.0453433	0.0482006	0.0510606	0.0539233	0.0567887	0.0596569	0.0625278	0.0654015	0.0682778	0.0711569	0.0740387	0.0769233	0.0798105	0.0827005	0.0855932	0.0884886	0.0913867	0.0942876	0.0971911	0.100097	0.103006	0.105918	0.108832	0.111749	0.114669	0.117592
0.9825	0.0575		0.999999	0.085		0.0095	0.0475	0	0.00269213	0.00538688	0.00808426	0.0107843	0.0134869	0.0161921	0.0189	0.0216104	0.0243235	0.0270392	0.0297575	0.0324785	0.035202	0.0379282	0.0406569	0.0433883	0.0461223	0.0488589	0.0515981	0.0543399	0.0570843	0.0598313	0.0625809	0.0653331	0.0680879	0.0708453	0.0736053	0.0763679	0.0791331	0.0819009	0.0846712	0.0874442	0.0902198	0.0929979	0.0957786	0.098562	0.101348	0.104136	0.106927	0.109721	0.112517
0.9824	0.06		0.999999	0.0775		0.01	0.05	0	0.00257946	0.00516141	0.00774587	0.0103328	0.0129223	0.0155142	0.0181087	0.0207056	0.023305	0.025907	0.0285114	0.0311183	0.0337277	0.0363396	0.038954	0.0415709	0.0441903	0.0468121	0.0494365	0.0520633	0.0546926	0.0573244	0.0599587	0.0625954	0.0652346	0.0678764	0.0705206	0.0731672	0.0758164	0.078468	0.0811221	0.0837787	0.0864377	0.0890992	0.0917632	0.0944297	0.0970986	0.09977	0.102444	0.10512	0.107799
0.9823	0.01		0.999999	0.075		0.0105	0.0525	0	0.00247453	0.00495144	0.00743073	0.00991241	0.0123965	0.0148829	0.0173717	0.0198629	0.0223565	0.0248525	0.0273508	0.0298516	0.0323547	0.0348601	0.037368	0.0398782	0.0423908	0.0449058	0.0474232	0.0499429	0.052465	0.0549894	0.0575163	0.0600455	0.062577	0.065111	0.0676473	0.070186	0.072727	0.0752704	0.0778162	0.0803643	0.0829148	0.0854676	0.0880228	0.0905804	0.0931403	0.0957026	0.0982672	0.100834	0.103404
0.9823	0.0625		0.999999	0.0725		0.011	0.055	0	0.00237664	0.00475556	0.00713675	0.00952022	0.011906	0.014294	0.0166843	0.0190768	0.0214716	0.0238688	0.0262681	0.0286698	0.0310737	0.0334799	0.0358883	0.038299	0.040712	0.0431273	0.0455448	0.0479646	0.0503866	0.0528109	0.0552375	0.0576664	0.0600975	0.0625308	0.0649665	0.0674043	0.0698445	0.0722869	0.0747315	0.0771785	0.0796276	0.0820791	0.0845327	0.0869887	0.0894469	0.0919073	0.09437	0.0968349	0.0993021
0.9822	0.065		0.999999	0.04		0.0115	0.0575	0	0.00228519	0.00457254	0.00686207	0.00915378	0.0114476	0.0137437	0.0160419	0.0183423	0.0206448	0.0229496	0.0252565	0.0275655	0.0298768	0.0321901	0.0345057	0.0368234	0.0391433	0.0414654	0.0437896	0.046116	0.0484446	0.0507753	0.0531082	0.0554432	0.0577804	0.0601198	0.0624613	0.064805	0.0671508	0.0694988	0.071849	0.0742013	0.0765558	0.0789124	0.0812712	0.0836321	0.0859952	0.0883604	0.0907278	0.0930974	0.0954691
0.9821	0.0675		0.999999	0.07		0.012	0.06	0	0.00219961	0.0044013	0.00660507	0.00881091	0.0110188	0.0132288	0.0154409	0.017655	0.0198712	0.0220895	0.0243098	0.0265323	0.0287568	0.0309833	0.033212	0.0354427	0.0376754	0.0399103	0.0421472	0.0443862	0.0466272	0.0488704	0.0511155	0.0533628	0.0556121	0.0578635	0.060117	0.0623725	0.0646301	0.0668897	0.0691514	0.0714152	0.073681	0.0759489	0.0782189	0.0804909	0.0827649	0.0850411	0.0873193	0.0895995	0.0918818
0.982	0.07		0.999999	0.0875		0.0125	0.0625	0	0.00211944	0.00424087	0.00636428	0.00848967	0.010617	0.0127464	0.0148777	0.0170111	0.0191464	0.0212836	0.0234229	0.0255641	0.0277074	0.0298526	0.0319997	0.0341489	0.0363001	0.0384532	0.0406083	0.0427653	0.0449244	0.0470854	0.0492484	0.0514134	0.0535804	0.0557493	0.0579202	0.0600931	0.062268	0.0644448	0.0666236	0.0688044	0.0709872	0.0731719	0.0753586	0.0775473	0.0797379	0.0819305	0.0841251	0.0863217	0.0885202
0.982	0.0725		0.999999	0.0675		0.013	0.065	0	0.00204424	0.00409037	0.0061384	0.00818832	0.0102401	0.0122939	0.0143495	0.016407	0.0184664	0.0205277	0.0225909	0.0246559	0.0267229	0.0287918	0.0308626	0.0329352	0.0350098	0.0370862	0.0391645	0.0412448	0.0433269	0.0454109	0.0474968	0.0495846	0.0516743	0.0537659	0.0558593	0.0579547	0.0600519	0.0621511	0.0642521	0.066355	0.0684598	0.0705665	0.0726751	0.0747855	0.0768979	0.0790121	0.0811282	0.0832462	0.0853661
0.9819	0.075		0.999999	0.065		0.0135	0.0675	0	0.00197361	0.00394903	0.00592627	0.00790531	0.00988618	0.0118689	0.0138533	0.0158396	0.0178278	0.0198177	0.0218094	0.023803	0.0257983	0.0277955	0.0297945	0.0317953	0.0337979	0.0358024	0.0378086	0.0398166	0.0418265	0.0438382	0.0458516	0.0478669	0.049884	0.0519029	0.0539237	0.0559462	0.0579705	0.0599967	0.0620246	0.0640544	0.066086	0.0681193	0.0701545	0.0721915	0.0742303	0.0762709	0.0783133	0.0803575	0.0824035
0.9819	0.0075		0.999999	0.0425		0.014	0.07	0	0.00190721	0.00381616	0.00572684	0.00763925	0.00955341	0.0114693	0.0133869	0.0153063	0.0172274	0.0191502	0.0210748	0.0230011	0.0249291	0.0268589	0.0287904	0.0307236	0.0326586	0.0345953	0.0365337	0.0384739	0.0404158	0.0423595	0.0443049	0.046252	0.0482008	0.0501514	0.0521037	0.0540577	0.0560135	0.057971	0.0599303	0.0618912	0.063854	0.0658184	0.0677846	0.0697525	0.0717221	0.0736934	0.0756665	0.0776414	0.0796179
0.9818	0.0775		0.999999	0.0625		0.0145	0.0725	0	0.00184473	0.00369112	0.00553917	0.00738888	0.00924026	0.0110933	0.012948	0.0148044	0.0166624	0.0185221	0.0203834	0.0222464	0.0241111	0.0259774	0.0278454	0.0297151	0.0315864	0.0334594	0.035334	0.0372103	0.0390883	0.0409679	0.0428492	0.0447321	0.0466167	0.048503	0.0503909	0.0522805	0.0541717	0.0560646	0.0579592	0.0598554	0.0617533	0.0636529	0.0655541	0.0674569	0.0693615	0.0712676	0.0731755	0.075085	0.0769961
0.9817	0.08		0.999999	0.06		0.015	0.075	0	0.00178588	0.00357335	0.00536241	0.00715306	0.00894531	0.0107392	0.0125346	0.0143316	0.0161302	0.0179304	0.0197322	0.0215356	0.0233406	0.0251472	0.0269554	0.0287651	0.0305765	0.0323894	0.034204	0.0360201	0.0378378	0.0396571	0.041478	0.0433005	0.0451246	0.0469503	0.0487776	0.0506064	0.0524369	0.0542689	0.0561026	0.0579378	0.0597746	0.061613	0.063453	0.0652946	0.0671378	0.0689826	0.0708289	0.0726769	0.0745264
0.9816	0.0825		0.999999	0.09		0.0155	0.0775	0	0.00173041	0.00346234	0.0051958	0.00693079	0.0086673	0.0104053	0.0121449	0.013886	0.0156286	0.0173727	0.0191184	0.0208656	0.0226143	0.0243646	0.0261164	0.0278697	0.0296245	0.0313808	0.0331387	0.0348981	0.0366591	0.0384215	0.0401855	0.041951	0.0437181	0.0454866	0.0472567	0.0490283	0.0508015	0.0525761	0.0543523	0.0561301	0.0579093	0.0596901	0.0614724	0.0632562	0.0650416	0.0668284	0.0686168	0.0704068	0.0721982
0.9815	0.085		0.999999	0.045		0.016	0.08	0	0.00167809	0.00335764	0.00503865	0.00672113	0.00840507	0.0100905	0.0117773	0.0134657	0.0151555	0.0168467	0.0185394	0.0202336	0.0219293	0.0236264	0.025325	0.027025	0.0287265	0.0304295	0.0321339	0.0338398	0.0355472	0.037256	0.0389663	0.0406781	0.0423913	0.044106	0.0458221	0.0475397	0.0492588	0.0509794	0.0527014	0.0544248	0.0561498	0.0578762	0.059604	0.0613334	0.0630641	0.0647964	0.0665301	0.0682653	0.070002
0.9815	0.0875		0.999999	0.0575		0.0165	0.0825	0	0.00162871	0.00325883	0.00489034	0.00652327	0.00815759	0.00979332	0.0114305	0.013069	0.0147089	0.0163503	0.017993	0.0196372	0.0212828	0.0229297	0.0245781	0.0262279	0.0278791	0.0295316	0.0311856	0.032841	0.0344978	0.036156	0.0378157	0.0394767	0.0411391	0.0428029	0.0444682	0.0461348	0.0478029	0.0494723	0.0511432	0.0528154	0.0544891	0.0561642	0.0578407	0.0595185	0.0611978	0.0628785	0.0645606	0.0662441	0.0679291
0.9814	0.09		0.999999	0.055		0.017	0.085	0	0.0015821	0.00316554	0.00475033	0.00633647	0.00792396	0.00951279	0.011103	0.0126945	0.0142874	0.0158816	0.0174772	0.0190741	0.0206724	0.022272	0.023873	0.0254753	0.027079	0.028684	0.0302903	0.0318981	0.0335071	0.0351175	0.0367293	0.0383424	0.0399569	0.0415727	0.0431898	0.0448084	0.0464282	0.0480494	0.049672	0.0512959	0.0529212	0.0545478	0.0561757	0.0578051	0.0594357	0.0610677	0.0627011	0.0643358	0.0659719
0.9813	0.0925		0.999999	0.0475		0.0175	0.0875	0	0.00153808	0.00307746	0.00461813	0.00616009	0.00770335	0.0092479	0.0107937	0.0123409	0.0138893	0.0154391	0.0169901	0.0185424	0.020096	0.0216509	0.0232071	0.0247646	0.0263234	0.0278835	0.0294449	0.0310076	0.0325716	0.0341369	0.0357035	0.0372713	0.0388405	0.040411	0.0419827	0.0435558	0.0451301	0.0467058	0.0482828	0.049861	0.0514406	0.0530214	0.0546035	0.056187	0.0577717	0.0593577	0.0609451	0.0625337	0.0641236
0.9812	0.005		0.999999	0.0525		0.018	0.09	0	0.00149652	0.00299429	0.0044933	0.00599355	0.00749505	0.00899779	0.0105018	0.012007	0.0135135	0.0150212	0.0165302	0.0180404	0.0195518	0.0210645	0.0225784	0.0240936	0.0256101	0.0271277	0.0286467	0.0301668	0.0316883	0.0332109	0.0347348	0.03626	0.0377864	0.039314	0.0408429	0.0423731	0.0439044	0.0454371	0.046971	0.0485061	0.0500425	0.0515801	0.0531189	0.0546591	0.0562004	0.057743	0.0592869	0.060832	0.0623784
0.9812	0.095		0.999999	0.05		0.0185	0.0925	0	0.0014573	0.00291579	0.00437548	0.00583636	0.00729844	0.00876172	0.0102262	0.0116919	0.0131587	0.0146268	0.016096	0.0175665	0.0190381	0.020511	0.021985	0.0234603	0.0249367	0.0264144	0.0278932	0.0293732	0.0308545	0.0323369	0.0338205	0.0353053	0.0367914	0.0382786	0.039767	0.0412566	0.0427475	0.0442395	0.0457327	0.0472271	0.0487227	0.0502196	0.0517176	0.0532168	0.0547172	0.0562188	0.0577217	0.0592257	0.0607309
0.9811	0.0975		0.999999	0.0925		0.019	0.095	0	0.0014203	0.00284175	0.00426435	0.0056881	0.007113	0.00853905	0.00996626	0.0113946	0.0128241	0.0142548	0.0156866	0.0171195	0.0185536	0.0199889	0.0214253	0.0228629	0.0243016	0.0257415	0.0271825	0.0286247	0.030068	0.0315125	0.0329581	0.0344049	0.0358528	0.0373019	0.0387522	0.0402036	0.0416561	0.0431098	0.0445647	0.0460207	0.0474779	0.0489362	0.0503957	0.0518563	0.0533181	0.0547811	0.0562452	0.0577104	0.0591768
0.981	0.1		0.999999	0.095		0.0195	0.0975	0	0.00138545	0.002772	0.00415965	0.00554842	0.00693829	0.00832927	0.00972136	0.0111146	0.0125089	0.0139043	0.0153008	0.0166984	0.0180971	0.019497	0.0208979	0.0223	0.0237032	0.0251075	0.0265129	0.0279194	0.029327	0.0307357	0.0321455	0.0335565	0.0349685	0.0363817	0.037796	0.0392114	0.0406279	0.0420455	0.0434642	0.044884	0.046305	0.047727	0.0491502	0.0505745	0.0519999	0.0534264	0.054854	0.0562827	0.0577126
0.9809	0.1025		0.999999	0.0975		0.02	0.1	0	0.00135266	0.00270639	0.00406118	0.00541704	0.00677396	0.00813195	0.00949101	0.0108511	0.0122123	0.0135746	0.0149379	0.0163023	0.0176678	0.0190343	0.0204019	0.0217706	0.0231403	0.0245111	0.025883	0.0272559	0.02863	0.030005	0.0313812	0.0327584	0.0341367	0.0355161	0.0368965	0.038278	0.0396606	0.0410442	0.042429	0.0438148	0.0452016	0.0465896	0.0479786	0.0493686	0.0507598	0.052152	0.0535453	0.0549397	0.0563351
0.9807	0.105		0.999999	0.1		0.0205	0.1025	0	0.00132189	0.00264481	0.00396876	0.00529374	0.00661974	0.00794677	0.00927483	0.0106039	0.011934	0.0132652	0.0145974	0.0159306	0.0172648	0.0186001	0.0199364	0.0212737	0.022612	0.0239514	0.0252919	0.0266333	0.0279758	0.0293193	0.0306638	0.0320094	0.033356	0.0347037	0.0360523	0.037402	0.0387528	0.0401046	0.0414574	0.0428112	0.0441661	0.045522	0.0468789	0.0482369	0.0495959	0.0509559	0.052317	0.0536791	0.0550422
0.9806	0.1075		0.999999	0.1025		0.021	0.105	0	0.0012931	0.0025872	0.00388229	0.00517837	0.00647544	0.0077735	0.00907256	0.0103726	0.0116736	0.0129757	0.0142787	0.0155827	0.0168877	0.0181938	0.0195008	0.0208088	0.0221177	0.0234277	0.0247387	0.0260507	0.0273637	0.0286776	0.0299926	0.0313085	0.0326255	0.0339435	0.0352624	0.0365823	0.0379033	0.0392252	0.0405482	0.0418721	0.043197	0.0445229	0.0458499	0.0471778	0.0485067	0.0498366	0.0511675	0.0524995	0.0538324
0.9805	0.11		0.999999	0.105		0.0215	0.1075	0	0.00126627	0.0025335	0.00380169	0.00507083	0.00634093	0.00761199	0.00888401	0.010157	0.0114309	0.0127058	0.0139817	0.0152585	0.0165363	0.017815	0.0190947	0.0203753	0.021657	0.0229395	0.0242231	0.0255076	0.026793	0.0280795	0.0293668	0.0306552	0.0319445	0.0332348	0.034526	0.0358182	0.0371113	0.0384055	0.0397006	0.0409966	0.0422936	0.0435916	0.0448905	0.0461904	0.0474913	0.0487931	0.0500959	0.0513997	0.0527044
0.9803	0.1125		0.999999	0.1075		0.022	0.11	0	0.00124138	0.00248368	0.00372691	0.00497106	0.00621614	0.00746215	0.00870909	0.00995695	0.0112057	0.0124555	0.0137061	0.0149577	0.0162102	0.0174636	0.018718	0.0199732	0.0212294	0.0224866	0.0237447	0.0250037	0.0262636	0.0275245	0.0287862	0.030049	0.0313126	0.0325772	0.0338427	0.0351092	0.0363765	0.0376448	0.0389141	0.0401842	0.0414553	0.0427274	0.0440003	0.0452742	0.0465491	0.0478248	0.0491015	0.0503792	0.0516577
0.9803	0.0025		0.999969	0.11		0.0225	0.1125	0	0.00121841	0.00243772	0.00365793	0.00487903	0.00610103	0.00732393	0.00854772	0.00977241	0.010998	0.0122245	0.0134519	0.0146802	0.0159093	0.0171394	0.0183704	0.0196023	0.020835	0.0220687	0.0233033	0.0245388	0.0257751	0.0270124	0.0282506	0.0294897	0.0307297	0.0319705	0.0332123	0.034455	0.0356986	0.0369431	0.0381884	0.0394347	0.0406819	0.04193	0.043179	0.0444289	0.0456797	0.0469314	0.048184	0.0494375	0.0506919
0.9802	0.115		0.999965	0.1125		0.023	0.115	0	0.00119737	0.00239562	0.00359473	0.00479471	0.00599555	0.00719727	0.00839986	0.00960332	0.0108076	0.0120128	0.0132189	0.0144259	0.0156337	0.0168423	0.0180519	0.0192623	0.0204736	0.0216858	0.0228988	0.0241127	0.0253275	0.0265432	0.0277597	0.0289771	0.0301954	0.0314145	0.0326345	0.0338554	0.0350772	0.0362999	0.0375234	0.0387478	0.039973	0.0411992	0.0424262	0.0436541	0.0448828	0.0461125	0.047343	0.0485744	0.0498067
0.98	0.1175		0.99996	0.115		0.0235	0.1175	0	0.00117824	0.00235732	0.00353725	0.00471802	0.00589964	0.00708209	0.0082654	0.00944954	0.0106345	0.0118204	0.013007	0.0141946	0.0153829	0.0165722	0.0177622	0.0189531	0.0201449	0.0213375	0.0225309	0.0237252	0.0249204	0.0261164	0.0273132	0.0285109	0.0297094	0.0309088	0.032109	0.0333101	0.034512	0.0357148	0.0369184	0.0381229	0.0393282	0.0405343	0.0417414	0.0429492	0.0441579	0.0453675	0.0465779	0.0477892	0.0490013
0.9798	0.12		0.999955	0.1175		0.024	0.12	0	0.00116099	0.00232279	0.00348542	0.00464886	0.00581313	0.00697822	0.00814412	0.00931085	0.0104784	0.0116468	0.012816	0.013986	0.0151568	0.0163285	0.0175009	0.0186742	0.0198484	0.0210233	0.0221991	0.0233757	0.0245531	0.0257313	0.0269104	0.0280903	0.029271	0.0304525	0.0316349	0.0328181	0.0340021	0.0351869	0.0363726	0.0375591	0.0387464	0.0399345	0.0411235	0.0423133	0.0435039	0.0446953	0.0458876	0.0470807	0.0482746
0.9795	0.1225		0.999949	0.12		0.0245	0.1225	0	0.00114556	0.00229192	0.00343907	0.00458703	0.00573578	0.00688533	0.00803569	0.00918684	0.0103388	0.0114915	0.0126451	0.0137994	0.0149546	0.0161105	0.0172673	0.0184248	0.0195832	0.0207423	0.0219023	0.0230631	0.0242246	0.025387	0.0265501	0.0277141	0.0288789	0.0300444	0.0312108	0.032378	0.033546	0.0347147	0.0358843	0.0370547	0.0382259	0.0393979	0.0405707	0.0417443	0.0429187	0.0440939	0.0452699	0.0464468	0.0476244
0.9792	0.125		0.999944	0.1225		0.025	0.125	0	0.00113188	0.00226454	0.00339797	0.00453219	0.00566718	0.00680296	0.00793951	0.00907684	0.010215	0.0113538	0.0124935	0.013634	0.0147752	0.0159172	0.01706	0.0182036	0.0193479	0.0204931	0.021639	0.0227857	0.0239332	0.0250815	0.0262305	0.0273803	0.0285309	0.0296823	0.0308345	0.0319875	0.0331412	0.0342957	0.0354511	0.0366072	0.037764	0.0389217	0.0400801	0.0412394	0.0423994	0.0435602	0.0447218	0.0458841	0.0470473
0.979	0		0.999937	0.125		0.0255	0.1275	0	0.00111983	0.00224042	0.00336177	0.00448388	0.00560675	0.00673039	0.00785478	0.00897994	0.0101059	0.0112325	0.01236	0.0134882	0.0146172	0.0157469	0.0168774	0.0180086	0.0191406	0.0202734	0.021407	0.0225413	0.0236764	0.0248122	0.0259488	0.0270862	0.0282243	0.0293632	0.0305028	0.0316433	0.0327844	0.0339264	0.0350691	0.0362126	0.0373569	0.0385019	0.0396477	0.0407942	0.0419415	0.0430896	0.0442384	0.0453881	0.0465384
0.9789	0.1275		0.999928	0.1275		0.026	0.13	0	0.00110926	0.00221926	0.00333	0.00444149	0.00555373	0.00666671	0.00778043	0.0088949	0.0100101	0.0111261	0.0122428	0.0133602	0.0144784	0.0155974	0.0167171	0.0178375	0.0189587	0.0200806	0.0212033	0.0223267	0.0234509	0.0245758	0.0257015	0.0268279	0.027955	0.0290829	0.0302116	0.031341	0.0324712	0.0336021	0.0347337	0.0358661	0.0369992	0.0381331	0.0392678	0.0404032	0.0415393	0.0426762	0.0438139	0.0449523	0.0460914
0.9786	0.13		0.999919	0.13		0.0265	0.1325	0	0.00109997	0.00220068	0.00330211	0.00440427	0.00550716	0.00661078	0.00771513	0.00882022	0.00992603	0.0110326	0.0121398	0.0132478	0.0143566	0.015466	0.0165762	0.0176872	0.0187988	0.0199112	0.0210243	0.0221382	0.0232528	0.0243681	0.0254841	0.0266009	0.0277184	0.0288367	0.0299557	0.0310754	0.0321958	0.033317	0.0344389	0.0355616	0.0366849	0.0378091	0.0389339	0.0400595	0.0411858	0.0423129	0.0434406	0.0445692	0.0456984
0.9782	0.1325		0.9999	0.135		0.027	0.135	0	0.00109177	0.00218425	0.00327745	0.00437136	0.00546599	0.00656134	0.0076574	0.00875418	0.00985167	0.0109499	0.0120488	0.0131484	0.0142488	0.0153499	0.0164517	0.0175542	0.0186574	0.0197614	0.020866	0.0219714	0.0230775	0.0241843	0.0252919	0.0264001	0.0275091	0.0286188	0.0297292	0.0308403	0.0319522	0.0330647	0.034178	0.035292	0.0364068	0.0375222	0.0386384	0.0397553	0.0408729	0.0419912	0.0431102	0.04423	0.0453505
0.9778	0.135		0.999883	0.1375		0.0275	0.1375	0	0.00108441	0.00216952	0.00325533	0.00434185	0.00542906	0.00651698	0.00760561	0.00869494	0.00978497	0.0108757	0.0119671	0.0130593	0.0141521	0.0152457	0.0163399	0.0174349	0.0185305	0.0196269	0.020724	0.0218218	0.0229202	0.0240194	0.0251193	0.0262199	0.0273212	0.0284232	0.0295259	0.0306294	0.0317335	0.0328383	0.0339438	0.0350501	0.036157	0.0372647	0.0383731	0.0394821	0.0405919	0.0417024	0.0428136	0.0439255	0.0450381
0.9774	0.1375		0.999867	0.14		0.028	0.14	0	0.00107766	0.00215602	0.00323506	0.0043148	0.00539522	0.00647634	0.00755814	0.00864064	0.00972383	0.0108077	0.0118923	0.0129775	0.0140635	0.0151501	0.0162375	0.0173255	0.0184142	0.0195037	0.0205938	0.0216846	0.0227761	0.0238682	0.0249611	0.0260547	0.0271489	0.0282439	0.0293396	0.0304359	0.0315329	0.0326307	0.0337291	0.0348282	0.035928	0.0370285	0.0381297	0.0392316	0.0403342	0.0414375	0.0425415	0.0436461	0.0447515
0.9769	0.14		0.99985	0.145		0.0285	0.1425	0	0.00107132	0.00214331	0.00321598	0.00428934	0.00536337	0.00643808	0.00751347	0.00858954	0.00966628	0.0107437	0.0118218	0.0129006	0.0139801	0.0150602	0.0161411	0.0172226	0.0183047	0.0193876	0.0204712	0.0215554	0.0226403	0.0237259	0.0248122	0.0258991	0.0269868	0.0280751	0.0291641	0.0302538	0.0313441	0.0324352	0.0335269	0.0346193	0.0357124	0.0368062	0.0379006	0.0389957	0.0400916	0.0411881	0.0422852	0.0433831	0.0444816
0.9764	0.1425		0.99985	0.1425		0.029	0.145	0	0.00106517	0.00213101	0.00319751	0.00426469	0.00533253	0.00640103	0.00747021	0.00854006	0.00961057	0.0106818	0.0117536	0.0128261	0.0138993	0.0149732	0.0160477	0.0171229	0.0181987	0.0192753	0.0203525	0.0214303	0.0225089	0.0235881	0.024668	0.0257485	0.0268297	0.0279116	0.0289942	0.0300774	0.0311613	0.0322459	0.0333311	0.034417	0.0355036	0.0365909	0.0376788	0.0387674	0.0398566	0.0409466	0.0420372	0.0431284	0.0442204
0.9759	0.145		0.999809	0.1475		0.0295	0.1475	0	0.00105906	0.00211878	0.00317916	0.0042402	0.00530189	0.00636423	0.00742724	0.0084909	0.00955522	0.0106202	0.0116858	0.0127521	0.0138191	0.0148867	0.0159549	0.0170239	0.0180934	0.0191637	0.0202346	0.0213061	0.0223783	0.0234512	0.0245247	0.0255989	0.0266738	0.0277493	0.0288254	0.0299023	0.0309798	0.0320579	0.0331367	0.0342162	0.0352963	0.036377	0.0374585	0.0385406	0.0396233	0.0407067	0.0417908	0.0428755	0.0439609
0.9754	0.1475		0.9998	0.155		0.03	0.15	0	0.00105287	0.00210639	0.00316056	0.00421537	0.00527082	0.00632693	0.00738367	0.00844107	0.00949911	0.0105578	0.0116171	0.0126771	0.0137377	0.014799	0.0158609	0.0169235	0.0179867	0.0190506	0.0201151	0.0211802	0.022246	0.0233125	0.0243796	0.0254473	0.0265157	0.0275848	0.0286545	0.0297248	0.0307958	0.0318674	0.0329397	0.0340126	0.0350862	0.0361604	0.0372353	0.0383108	0.039387	0.0404638	0.0415412	0.0426193	0.0436981
0.9749	0.15		0.9997	0.1625		0.0305	0.1525	0	0.00104651	0.00209365	0.00314143	0.00418984	0.00523889	0.00628858	0.0073389	0.00838985	0.00944144	0.0104937	0.0115465	0.0126	0.0136542	0.0147089	0.0157643	0.0168204	0.017877	0.0189344	0.0199923	0.0210509	0.0221101	0.02317	0.0242305	0.0252916	0.0263533	0.0274157	0.0284788	0.0295425	0.0306068	0.0316717	0.0327373	0.0338035	0.0348704	0.0359379	0.037006	0.0380748	0.0391442	0.0402142	0.0412849	0.0423562	0.0434282
0.9743	0.1525		0.9996	0.1675		0.031	0.155	0	0.00103992	0.00208046	0.00312162	0.00416341	0.00520583	0.00624886	0.00729252	0.00833681	0.00938172	0.0104273	0.0114734	0.0125202	0.0135676	0.0146156	0.0156643	0.0167136	0.0177635	0.018814	0.0198652	0.020917	0.0219694	0.0230224	0.0240761	0.0251304	0.0261853	0.0272408	0.028297	0.0293538	0.0304112	0.0314692	0.0325279	0.0335872	0.0346471	0.0357076	0.0367688	0.0378306	0.038893	0.039956	0.0410197	0.042084	0.0431489
0.9738	0.155		0.9995	0.17		0.0315	0.1575	0	0.00103307	0.00206676	0.00310106	0.00413597	0.0051715	0.00620763	0.00724439	0.00828175	0.00931973	0.0103583	0.0113975	0.0124374	0.0134778	0.0145188	0.0155605	0.0166028	0.0176457	0.0186892	0.0197333	0.020778	0.0218234	0.0228693	0.0239159	0.0249631	0.0260109	0.0270593	0.0281083	0.029158	0.0302082	0.0312591	0.0323106	0.0333627	0.0344154	0.0354688	0.0365227	0.0375773	0.0386325	0.0396883	0.0407447	0.0418017	0.0428593
0.9732	0.1575		0.9994	0.175		0.032	0.16	0	0.00102597	0.00205255	0.00307973	0.00410751	0.00513589	0.00616488	0.00719447	0.00822466	0.00925545	0.0102868	0.0113188	0.0123514	0.0133846	0.0144185	0.0154529	0.0164879	0.0175235	0.0185597	0.0195965	0.020634	0.021672	0.0227106	0.0237498	0.0247897	0.0258301	0.0268712	0.0279128	0.0289551	0.0299979	0.0310414	0.0320854	0.0331301	0.0341754	0.0352212	0.0362677	0.0373148	0.0383625	0.0394108	0.0404596	0.0415091	0.0425592
0.9726	0.16		0.999399	0.1725		0.0325	0.1625	0	0.00101864	0.00203786	0.00305768	0.00407809	0.00509909	0.00612068	0.00714287	0.00816564	0.00918901	0.010213	0.0112375	0.0122627	0.0132884	0.0143147	0.0153416	0.0163691	0.0173972	0.0184259	0.0194552	0.0204851	0.0215156	0.0225466	0.0235783	0.0246105	0.0256434	0.0266768	0.0277108	0.0287454	0.0297806	0.0308164	0.0318528	0.0328898	0.0339274	0.0349655	0.0360043	0.0370436	0.0380836	0.0391241	0.0401652	0.041207	0.0422493
0.9721	0.1625		0.9993	0.1775		0.033	0.165	0	0.00101108	0.00202275	0.00303499	0.00404781	0.00506122	0.0060752	0.00708976	0.00810491	0.00912063	0.0101369	0.0111538	0.0121713	0.0131893	0.014208	0.0152272	0.016247	0.0172673	0.0182883	0.0193098	0.0203319	0.0213546	0.0223779	0.0234018	0.0244262	0.0254512	0.0264768	0.027503	0.0285298	0.0295571	0.030585	0.0316135	0.0326426	0.0336723	0.0347025	0.0357334	0.0367648	0.0377968	0.0388293	0.0398625	0.0408962	0.0419305
0.9715	0.165		0.99918	0.18		0.0335	0.1675	0	0.00100335	0.00200726	0.00301175	0.00401681	0.00502243	0.00602862	0.00703539	0.00804272	0.00905062	0.0100591	0.0110681	0.0120777	0.0130879	0.0140987	0.01511	0.0161219	0.0171343	0.0181474	0.019161	0.0201751	0.0211899	0.0222052	0.0232211	0.0242375	0.0252545	0.0262721	0.0272903	0.028309	0.0293283	0.0303482	0.0313686	0.0323896	0.0334112	0.0344333	0.0354561	0.0364793	0.0375032	0.0385276	0.0395526	0.0405782	0.0416043
0.9709	0.1675		0.999091	0.1825		0.034	0.17	0	0.000995466	0.00199149	0.00298807	0.00398521	0.00498291	0.00598117	0.00697998	0.00797936	0.00897929	0.00997978	0.0109808	0.0119824	0.0129846	0.0139873	0.0149906	0.0159945	0.0169989	0.0180038	0.0190093	0.0200154	0.0210221	0.0220293	0.023037	0.0240453	0.0250542	0.0260636	0.0270736	0.0280842	0.0290953	0.0301069	0.0311192	0.0321319	0.0331453	0.0341592	0.0351736	0.0361887	0.0372042	0.0382204	0.0392371	0.0402543	0.0412721
0.9703	0.17		0.999	0.185		0.0345	0.1725	0	0.000987473	0.00197549	0.00296406	0.00395317	0.00494284	0.00593305	0.0069238	0.00791511	0.00890696	0.00989936	0.0108923	0.0118858	0.0128798	0.0138744	0.0148696	0.0158653	0.0168615	0.0178583	0.0188556	0.0198535	0.0208519	0.0218509	0.0228504	0.0238505	0.0248511	0.0258522	0.026854	0.0278562	0.028859	0.0298624	0.0308663	0.0318707	0.0328757	0.0338813	0.0348874	0.035894	0.0369012	0.0379089	0.0389172	0.0399261	0.0409354
0.9698	0.1725		0.998899	0.1875		0.035	0.175	0	0.000979402	0.00195934	0.00293982	0.00392083	0.00490238	0.00588446	0.00686708	0.00785024	0.00883394	0.00981817	0.0108029	0.0117882	0.0127741	0.0137605	0.0147474	0.0157348	0.0167228	0.0177113	0.0187004	0.01969	0.0206801	0.0216708	0.022662	0.0236538	0.0246461	0.0256389	0.0266322	0.0276261	0.0286206	0.0296155	0.0306111	0.0316071	0.0326037	0.0336008	0.0345984	0.0355966	0.0365954	0.0375946	0.0385944	0.0395948	0.0405957
0.9692	0.175		0.998778	0.19		0.0355	0.1775	0	0.000971285	0.0019431	0.00291543	0.0038883	0.00486169	0.0058356	0.00681004	0.00778501	0.0087605	0.00973652	0.0107131	0.0116901	0.0126677	0.0136459	0.0146245	0.0156037	0.0165834	0.0175636	0.0185444	0.0195256	0.0205074	0.0214898	0.0224726	0.023456	0.0244399	0.0254244	0.0264093	0.0273948	0.0283808	0.0293674	0.0303544	0.031342	0.0323302	0.0333188	0.034308	0.0352977	0.0362879	0.0372787	0.0382699	0.0392617	0.0402541
0.9686	0.1775		0.998659	0.1925		0.036	0.18	0	0.000963151	0.00192682	0.002891	0.00385569	0.00482091	0.00578663	0.00675288	0.00771963	0.00868691	0.0096547	0.010623	0.0115918	0.0125612	0.013531	0.0145014	0.0154723	0.0164437	0.0174156	0.018388	0.0193609	0.0203344	0.0213084	0.0222829	0.0232579	0.0242334	0.0252094	0.026186	0.027163	0.0281406	0.0291187	0.0300973	0.0310765	0.0320561	0.0330363	0.034017	0.0349982	0.0359799	0.0369621	0.0379448	0.0389281	0.0399119
0.968	0.18		0.998522	0.195		0.0365	0.1825	0	0.000955023	0.00191055	0.00286658	0.00382312	0.00478016	0.00573771	0.00669576	0.00765432	0.00861338	0.00957295	0.010533	0.0114936	0.0124547	0.0134163	0.0143784	0.015341	0.0163041	0.0172677	0.0182318	0.0191964	0.0201615	0.0211272	0.0220933	0.0230599	0.0240271	0.0249947	0.0259629	0.0269315	0.0279007	0.0288704	0.0298405	0.0308112	0.0317824	0.0327541	0.0337263	0.034699	0.0356722	0.0366459	0.0376201	0.0385948	0.0395701
0.9674	0.1825		0.998371	0.1975		0.037	0.185	0	0.000946923	0.00189434	0.00284225	0.00379066	0.00473956	0.00568896	0.00663885	0.00758924	0.00854012	0.00949149	0.0104434	0.0113957	0.0123486	0.0133019	0.0142558	0.0152101	0.016165	0.0171203	0.0180761	0.0190325	0.0199893	0.0209466	0.0219044	0.0228627	0.0238215	0.0247808	0.0257406	0.0267009	0.0276616	0.0286229	0.0295847	0.0305469	0.0315097	0.0324729	0.0334367	0.0344009	0.0353657	0.0363309	0.0372966	0.0382628	0.0392295
0.9668	0.185		0.9982	0.2		0.0375	0.1875	0	0.00093887	0.00187822	0.00281806	0.00375839	0.00469919	0.00564049	0.00658226	0.00752452	0.00846727	0.0094105	0.0103542	0.0112984	0.0122431	0.0131883	0.0141339	0.0150801	0.0160267	0.0169738	0.0179214	0.0188695	0.019818	0.0207671	0.0217166	0.0226666	0.0236171	0.0245681	0.0255196	0.0264715	0.027424	0.0283769	0.0293303	0.0302842	0.0312386	0.0321934	0.0331488	0.0341046	0.0350609	0.0360177	0.036975	0.0379328	0.0388911
0.9662	0.1875		0.998014	0.2025		0.038	0.19	0	0.000930877	0.00186223	0.00279406	0.00372636	0.00465913	0.00559238	0.00652611	0.00746031	0.00839498	0.00933013	0.0102658	0.0112019	0.0121384	0.0130755	0.014013	0.014951	0.0158895	0.0168284	0.0177678	0.0187077	0.0196481	0.020589	0.0215303	0.0224721	0.0234143	0.0243571	0.0253003	0.026244	0.0271882	0.0281328	0.0290779	0.0300235	0.0309696	0.0319161	0.0328632	0.0338107	0.0347586	0.0357071	0.036656	0.0376054	0.0385552
0.9656	0.19		0.997854	0.205		0.0385	0.1925	0	0.000922958	0.00184638	0.00277027	0.00369462	0.00461944	0.00554472	0.00647047	0.00739668	0.00832336	0.00925051	0.0101781	0.0111062	0.0120347	0.0129637	0.0138932	0.0148231	0.0157535	0.0166844	0.0176157	0.0185475	0.0194798	0.0204125	0.0213457	0.0222793	0.0232135	0.024148	0.0250831	0.0260186	0.0269546	0.027891	0.0288279	0.0297653	0.0307032	0.0316415	0.0325802	0.0335195	0.0344592	0.0353993	0.0363399	0.037281	0.0382226
0.965	0.1925		0.9976	0.2075		0.039	0.195	0	0.000915123	0.0018307	0.00274674	0.00366322	0.00458017	0.00549757	0.00641543	0.00733374	0.0082525	0.00917173	0.0100914	0.0110115	0.0119321	0.0128532	0.0137747	0.0146966	0.015619	0.0165419	0.0174652	0.018389	0.0193132	0.0202379	0.0211631	0.0220887	0.0230147	0.0239412	0.0248682	0.0257956	0.0267235	0.0276518	0.0285806	0.0295099	0.0304396	0.0313697	0.0323003	0.0332314	0.0341629	0.0350949	0.0360273	0.0369602	0.0378935
0.9643	0.195		0.9974	0.21		0.0395	0.1975	0	0.000907379	0.0018152	0.00272348	0.00363219	0.00454136	0.00545097	0.00636102	0.00727153	0.00818247	0.00909387	0.0100057	0.010918	0.0118307	0.0127439	0.0136575	0.0145716	0.0154861	0.0164011	0.0173165	0.0182324	0.0191487	0.0200654	0.0209826	0.0219002	0.0228183	0.0237369	0.0246559	0.0255753	0.0264951	0.0274155	0.0283362	0.0292574	0.0301791	0.0311012	0.0320238	0.0329467	0.0338702	0.0347941	0.0357184	0.0366432	0.0375684
0.9637	0.1975		0.9971	0.2125		0.04	0.2	0	0.000899733	0.0017999	0.00270051	0.00360156	0.00450304	0.00540496	0.00630731	0.0072101	0.00811333	0.009017	0.0099211	0.0108256	0.0117306	0.012636	0.0135419	0.0144482	0.0153549	0.0162621	0.0171697	0.0180777	0.0189862	0.0198951	0.0208044	0.0217142	0.0226245	0.0235351	0.0244462	0.0253577	0.0262697	0.0271821	0.028095	0.0290083	0.029922	0.0308361	0.0317507	0.0326658	0.0335812	0.0344971	0.0354135	0.0363302	0.0372475
0.963	0.2		0.996899	0.215		0.0405	0.2025	0	0.00089219	0.00178481	0.00267786	0.00357133	0.00446523	0.00535956	0.00625432	0.00714951	0.00804512	0.00894117	0.00983764	0.0107345	0.0116319	0.0125296	0.0134278	0.0143264	0.0152255	0.0161249	0.0170248	0.0179252	0.0188259	0.0197271	0.0206287	0.0215307	0.0224332	0.0233361	0.0242394	0.0251432	0.0260473	0.026952	0.027857	0.0287625	0.0296683	0.0305747	0.0314814	0.0323886	0.0332962	0.0342042	0.0351127	0.0360216	0.0369309
0.9623	0.2025		0.9965	0.2175		0.041	0.205	0	0.000884753	0.00176993	0.00265552	0.00354153	0.00442796	0.00531481	0.00620208	0.00708977	0.00797788	0.00886641	0.00975535	0.0106447	0.0115345	0.0124247	0.0133153	0.0142064	0.0150978	0.0159897	0.016882	0.0177748	0.0186679	0.0195615	0.0204554	0.0213498	0.0222447	0.0231399	0.0240356	0.0249316	0.0258281	0.0267251	0.0276224	0.0285201	0.0294183	0.0303169	0.0312159	0.0321154	0.0330152	0.0339155	0.0348162	0.0357173	0.0366188
0.9617	0.205		0.9962	0.22		0.0415	0.2075	0	0.000877425	0.00175526	0.00263351	0.00351217	0.00439123	0.00527071	0.0061506	0.0070309	0.00791162	0.00879274	0.00967427	0.0105562	0.0114386	0.0123213	0.0132045	0.0140881	0.0149721	0.0158565	0.0167413	0.0176266	0.0185122	0.0193983	0.0202847	0.0211716	0.0220589	0.0229466	0.0238347	0.0247232	0.0256122	0.0265015	0.0273913	0.0282814	0.029172	0.030063	0.0309544	0.0318462	0.0327384	0.033631	0.0345241	0.0354175	0.0363114
0.961	0.2075		0.9958	0.2225		0.042	0.21	0	0.000870207	0.00174082	0.00261183	0.00348324	0.00435506	0.00522728	0.0060999	0.00697293	0.00784636	0.00872019	0.00959442	0.0104691	0.0113441	0.0122195	0.0130954	0.0139716	0.0148483	0.0157253	0.0166028	0.0174806	0.0183589	0.0192376	0.0201166	0.0209961	0.021876	0.0227562	0.0236369	0.024518	0.0253995	0.0262813	0.0271636	0.0280463	0.0289294	0.0298129	0.0306968	0.0315811	0.0324658	0.0333509	0.0342364	0.0351223	0.0360086
0.9603	0.21		0.9954	0.225		0.0425	0.2125	0	0.0008631	0.0017266	0.00259048	0.00345477	0.00431945	0.00518452	0.00604999	0.00691585	0.0077821	0.00864875	0.0095158	0.0103832	0.0112511	0.0121193	0.0129879	0.0138569	0.0147264	0.0155962	0.0164664	0.017337	0.018208	0.0190793	0.0199511	0.0208233	0.0216959	0.0225688	0.0234422	0.0243159	0.0251901	0.0260646	0.0269396	0.0278149	0.0286906	0.0295667	0.0304432	0.0313201	0.0321974	0.0330751	0.0339532	0.0348317	0.0357106
0.9595	0.2125		0.9949	0.2275		0.043	0.215	0	0.000856105	0.0017126	0.00256948	0.00342674	0.00428439	0.00514243	0.00600085	0.00685967	0.00771886	0.00857845	0.00943842	0.0102988	0.0111595	0.0120207	0.0128822	0.0137441	0.0146064	0.015469	0.0163321	0.0171956	0.0180594	0.0189236	0.0197882	0.0206532	0.0215186	0.0223844	0.0232505	0.0241171	0.024984	0.0258513	0.026719	0.0275871	0.0284556	0.0293244	0.0301937	0.0310633	0.0319333	0.0328038	0.0336745	0.0345457	0.0354173
0.9588	0.215		0.9943	0.23		0.0435	0.2175	0	0.000849222	0.00169882	0.0025488	0.00339916	0.0042499	0.00510101	0.00595251	0.00680438	0.00765663	0.00850927	0.00936228	0.0102157	0.0110694	0.0119236	0.0127781	0.013633	0.0144883	0.015344	0.0162	0.0170564	0.0179132	0.0187704	0.0196279	0.0204859	0.0213442	0.0222029	0.023062	0.0239214	0.0247812	0.0256414	0.026502	0.027363	0.0282243	0.0290861	0.0299482	0.0308106	0.0316735	0.0325367	0.0334004	0.0342644	0.0351287
0.958	0.2175		0.9937	0.2325		0.044	0.22	0	0.00084245	0.00168527	0.00252846	0.00337203	0.00421596	0.00506027	0.00590494	0.00674999	0.00759541	0.0084412	0.00928736	0.0101339	0.0109808	0.0118281	0.0126757	0.0135237	0.0143721	0.0152209	0.01607	0.0169195	0.0177694	0.0186197	0.0194703	0.0203213	0.0211726	0.0220243	0.0228765	0.0237289	0.0245818	0.025435	0.0262886	0.0271425	0.0279969	0.0288516	0.0297066	0.0305621	0.0314179	0.0322741	0.0331306	0.0339876	0.0348449
0.9573	0.22		0.993	0.235		0.0445	0.2225	0	0.000835788	0.00167194	0.00250845	0.00334533	0.00418258	0.00502018	0.00585815	0.00669649	0.00753519	0.00837425	0.00921368	0.0100535	0.0108936	0.0117341	0.012575	0.0134163	0.0142579	0.0150999	0.0159422	0.0167849	0.017628	0.0184714	0.0193152	0.0201593	0.0210039	0.0218487	0.022694	0.0235396	0.0243856	0.0252319	0.0260786	0.0269257	0.0277731	0.0286209	0.0294691	0.0303176	0.0311665	0.0320157	0.0328653	0.0337153	0.0345657
0.9565	0.2225		0.9922	0.2375		0.045	0.225	0	0.000829235	0.00165883	0.00248878	0.00331908	0.00414974	0.00498076	0.00581213	0.00664387	0.00747595	0.0083084	0.0091412	0.00997436	0.0108079	0.0116417	0.012476	0.0133106	0.0141455	0.0149808	0.0158165	0.0166525	0.0174888	0.0183256	0.0191626	0.0200001	0.0208379	0.021676	0.0225145	0.0233534	0.0241926	0.0250322	0.0258721	0.0267124	0.0275531	0.0283941	0.0292354	0.0300772	0.0309192	0.0317617	0.0326045	0.0334476	0.0342911
0.9557	0.225		0.9913	0.24		0.0455	0.2275	0	0.00082279	0.00164593	0.00246942	0.00329326	0.00411745	0.00494199	0.00576687	0.00659211	0.0074177	0.00824364	0.00906992	0.00989656	0.0107235	0.0115509	0.0123786	0.0132066	0.014035	0.0148637	0.0156928	0.0165222	0.017352	0.0181822	0.0190126	0.0198435	0.0206746	0.0215062	0.0223381	0.0231703	0.0240029	0.0248358	0.0256691	0.0265027	0.0273367	0.028171	0.0290057	0.0298407	0.0306761	0.0315118	0.0323479	0.0331843	0.0340211
0.9548	0.2275		0.9902	0.2425		0.046	0.23	0	0.000816452	0.00163325	0.00245039	0.00326787	0.00408569	0.00490386	0.00572236	0.00654122	0.00736041	0.00817995	0.00899983	0.00982005	0.0106406	0.0114615	0.0122828	0.0131044	0.0139263	0.0147486	0.0155712	0.0163942	0.0172175	0.0180411	0.0188651	0.0196895	0.0205141	0.0213392	0.0221645	0.0229902	0.0238163	0.0246427	0.0254694	0.0262965	0.0271239	0.0279517	0.0287798	0.0296082	0.030437	0.0312661	0.0320956	0.0329254	0.0337556
0.954	0.23		0.9888	0.245		0.0465	0.2325	0	0.00081022	0.00162078	0.00243167	0.00324289	0.00405446	0.00486636	0.00567859	0.00649117	0.00730407	0.00811732	0.0089309	0.00974481	0.0105591	0.0113737	0.0121886	0.0130038	0.0138194	0.0146354	0.0154516	0.0162682	0.0170852	0.0179025	0.0187201	0.019538	0.0203563	0.0211749	0.0219939	0.0228132	0.0236328	0.0244528	0.0252731	0.0260937	0.0269147	0.027736	0.0285576	0.0293796	0.0302019	0.0310246	0.0318476	0.0326709	0.0334946
0.9531	0.2325		0.9871	0.2475		0.047	0.235	0	0.000804091	0.00160851	0.00241326	0.00321834	0.00402375	0.00482948	0.00563555	0.00644195	0.00724868	0.00805573	0.00886312	0.00967083	0.0104789	0.0112872	0.012096	0.012905	0.0137143	0.014524	0.0153341	0.0161444	0.0169551	0.0177661	0.0185774	0.0193891	0.0202011	0.0210134	0.0218261	0.0226391	0.0234524	0.024266	0.02508	0.0258943	0.026709	0.0275239	0.0283392	0.0291548	0.0299708	0.0307871	0.0316037	0.0324206	0.0332379
0.9522	0.235		0.9847	0.25		0.0475	0.2375	0	0.000798063	0.00159645	0.00239516	0.00319419	0.00399355	0.00479323	0.00559323	0.00639355	0.0071942	0.00799517	0.00879647	0.00959808	0.0104	0.0112023	0.0120049	0.0128078	0.013611	0.0144146	0.0152185	0.0160227	0.0168272	0.017632	0.0184372	0.0192427	0.0200485	0.0208547	0.0216611	0.0224679	0.023275	0.0240825	0.0248902	0.0256983	0.0265067	0.0273154	0.0281245	0.0289338	0.0297435	0.0305536	0.0313639	0.0321746	0.0329856
0.9513	0.2375		0.9806	0.2525		0.048	0.24	0	0.000792137	0.00158459	0.00237736	0.00317045	0.00396385	0.00475757	0.00555161	0.00634596	0.00714063	0.00793562	0.00873093	0.00952655	0.0103225	0.0111187	0.0119153	0.0127122	0.0135094	0.0143069	0.0151048	0.0159029	0.0167014	0.0175002	0.0182993	0.0190987	0.0198985	0.0206985	0.0214989	0.0222996	0.0231006	0.0239019	0.0247036	0.0255055	0.0263078	0.0271104	0.0279133	0.0287165	0.0295201	0.0303239	0.0311281	0.0319326	0.0327374
0.9503	0.24		0.9697	0.2525		0.0485	0.2425	0	0.000786308	0.00157293	0.00235986	0.0031471	0.00393465	0.00472251	0.00551068	0.00629917	0.00708796	0.00787707	0.00866648	0.00945621	0.0102462	0.0110366	0.0118273	0.0126182	0.0134095	0.0142011	0.014993	0.0157852	0.0165777	0.0173706	0.0181637	0.0189572	0.0197509	0.020545	0.0213394	0.0221341	0.0229291	0.0237244	0.0245201	0.025316	0.0261123	0.0269088	0.0277057	0.0285029	0.0293004	0.0300982	0.0308963	0.0316947	0.0324935
0.9494	0.2425		0.9634	0.25		0.049	0.245	0	0.000780577	0.00156146	0.00234265	0.00312414	0.00390593	0.00468803	0.00547044	0.00625315	0.00703617	0.00781949	0.00860311	0.00938704	0.0101713	0.0109558	0.0117407	0.0125258	0.0133113	0.014097	0.0148831	0.0156695	0.0164561	0.0172431	0.0180304	0.018818	0.0196059	0.0203941	0.0211826	0.0219714	0.0227605	0.0235499	0.0243396	0.0251297	0.02592	0.0267106	0.0275016	0.0282928	0.0290844	0.0298762	0.0306684	0.0314609	0.0322536
0.9484	0.245		0.9589	0.2475		0.0495	0.2475	0	0.000774941	0.00155018	0.00232572	0.00310156	0.00387769	0.00465413	0.00543086	0.0062079	0.00698523	0.00776286	0.00854079	0.00931902	0.0100976	0.0108764	0.0116555	0.0124349	0.0132147	0.0139947	0.014775	0.0155556	0.0163365	0.0171178	0.0178993	0.0186811	0.0194632	0.0202456	0.0210284	0.0218114	0.0225947	0.0233783	0.0241622	0.0249464	0.0257309	0.0265157	0.0273008	0.0280863	0.028872	0.029658	0.0304443	0.0312309	0.0320178
0.9473	0.2475		0.955	0.245		0.05	0.25	0	0.000769399	0.00153909	0.00230908	0.00307935	0.00384992	0.00462079	0.00539195	0.0061634	0.00693514	0.00770718	0.00847951	0.00925214	0.0100251	0.0107983	0.0115718	0.0123456	0.0131197	0.013894	0.0146687	0.0154437	0.016219	0.0169945	0.0177704	0.0185465	0.019323	0.0200997	0.0208767	0.021654	0.0224316	0.0232096	0.0239878	0.0247662	0.025545	0.0263241	0.0271035	0.0278831	0.0286631	0.0294434	0.0302239	0.0310047	0.0317859
0.9463	0.25		0.9516	0.2425		0.0505	0.2525	0	0.000763948	0.00152818	0.00229271	0.00305752	0.00382262	0.004588	0.00535368	0.00611964	0.00688589	0.00765242	0.00841925	0.00918636	0.00995376	0.0107215	0.0114894	0.0122577	0.0130262	0.0137951	0.0145642	0.0153336	0.0161033	0.0168733	0.0176436	0.0184142	0.019185	0.0199562	0.0207276	0.0214993	0.0222713	0.0230436	0.0238162	0.0245891	0.0253622	0.0261357	0.0269094	0.0276834	0.0284577	0.0292323	0.0300072	0.0307824	0.0315579
0.9452	0.2525		0.9483	0.24		0.051	0.255	0	0.000758587	0.00151746	0.00227661	0.00303604	0.00379576	0.00455576	0.00531604	0.0060766	0.00683744	0.00759857	0.00835998	0.00912168	0.00988365	0.0106459	0.0114084	0.0121713	0.0129344	0.0136978	0.0144614	0.0152254	0.0159896	0.0167541	0.0175189	0.018284	0.0190494	0.019815	0.020581	0.0213472	0.0221137	0.0228804	0.0236475	0.0244148	0.0251825	0.0259504	0.0267186	0.027487	0.0282558	0.0290248	0.0297941	0.0305637	0.0313336
0.9441	0.255		0.9453	0.2375		0.0515	0.2575	0	0.000753315	0.00150691	0.00226077	0.00301492	0.00376934	0.00452404	0.00527902	0.00603427	0.0067898	0.00754561	0.0083017	0.00905806	0.0098147	0.0105716	0.0113288	0.0120863	0.012844	0.013602	0.0143604	0.0151189	0.0158778	0.0166369	0.0173963	0.018156	0.018916	0.0196762	0.0204367	0.0211975	0.0219586	0.02272	0.0234816	0.0242435	0.0250057	0.0257681	0.0265309	0.0272939	0.0280572	0.0288208	0.0295846	0.0303487	0.0311131
0.9429	0.2575		0.9423	0.235		0.052	0.26	0	0.000748129	0.00149653	0.0022452	0.00299415	0.00374336	0.00449285	0.00524261	0.00599264	0.00674295	0.00749352	0.00824437	0.00899549	0.00974688	0.0104985	0.0112505	0.0120027	0.0127552	0.0135079	0.0142609	0.0150142	0.0157678	0.0165216	0.0172758	0.0180301	0.0187848	0.0195397	0.0202949	0.0210504	0.0218061	0.0225622	0.0233184	0.024075	0.0248318	0.0255889	0.0263463	0.027104	0.0278619	0.0286201	0.0293785	0.0301373	0.0308963
0.9417	0.26		0.9395	0.2325		0.0525	0.2625	0	0.000743029	0.00148632	0.00222989	0.00297372	0.00371781	0.00446217	0.0052068	0.0059517	0.00669686	0.00744229	0.00818799	0.00893395	0.00968018	0.0104267	0.0111734	0.0119205	0.0126678	0.0134153	0.0141632	0.0149113	0.0156596	0.0164083	0.0171572	0.0179063	0.0186558	0.0194055	0.0201554	0.0209057	0.0216562	0.0224069	0.023158	0.0239093	0.0246609	0.0254127	0.0261648	0.0269172	0.0276698	0.0284227	0.0291759	0.0299293	0.030683
0.9405	0.2625		0.9368	0.23		0.053	0.265	0	0.000738012	0.00147629	0.00221482	0.00295362	0.00369268	0.004432	0.00517158	0.00591143	0.00665153	0.0073919	0.00813253	0.00887343	0.00961458	0.010356	0.0110977	0.0118396	0.0125818	0.0133243	0.014067	0.01481	0.0155532	0.0162968	0.0170405	0.0177846	0.0185289	0.0192734	0.0200183	0.0207633	0.0215087	0.0222543	0.0230002	0.0237463	0.0244927	0.0252394	0.0259863	0.0267335	0.0274809	0.0282286	0.0289766	0.0297248	0.0304733
0.9392	0.265		0.9342	0.2275		0.0535	0.2675	0	0.000733077	0.00146641	0.0022	0.00293385	0.00366796	0.00440232	0.00513694	0.00587181	0.00660695	0.00734234	0.00807798	0.00881389	0.00955005	0.0102865	0.0110231	0.0117601	0.0124973	0.0132347	0.0139724	0.0147104	0.0154486	0.0161871	0.0169258	0.0176648	0.0184041	0.0191436	0.0198833	0.0206233	0.0213636	0.0221042	0.0228449	0.023586	0.0243273	0.0250689	0.0258107	0.0265528	0.0272951	0.0280377	0.0287806	0.0295237	0.030267
0.9379	0.2675		0.9316	0.225		0.054	0.27	0	0.000728223	0.0014567	0.00218543	0.0029144	0.00364364	0.00437312	0.00510286	0.00583285	0.00656309	0.00729358	0.00802433	0.00875532	0.00948658	0.0102181	0.0109498	0.0116818	0.0124141	0.0131466	0.0138794	0.0146124	0.0153457	0.0160792	0.016813	0.017547	0.0182813	0.0190158	0.0197506	0.0204856	0.0212209	0.0219565	0.0226923	0.0234283	0.0241646	0.0249012	0.025638	0.026375	0.0271124	0.0278499	0.0285877	0.0293258	0.0300641
0.9365	0.27		0.9291	0.2225		0.0545	0.2725	0	0.000723259	0.00144677	0.00217052	0.00289452	0.00361877	0.00434327	0.00506801	0.00579301	0.00651825	0.00724373	0.00796947	0.00869545	0.00942169	0.0101482	0.0108749	0.0116019	0.0123291	0.0130566	0.0137843	0.0145122	0.0152405	0.0159689	0.0166976	0.0174266	0.0181558	0.0188853	0.019615	0.0203449	0.0210751	0.0218055	0.0225362	0.0232672	0.0239984	0.0247298	0.0254615	0.0261934	0.0269256	0.0276581	0.0283907	0.0291237	0.0298568
0.9352	0.2725		0.9266	0.22		0.055	0.275	0	0.000718139	0.00143652	0.00215515	0.00287402	0.00359313	0.00431248	0.00503208	0.00575192	0.006472	0.00719233	0.0079129	0.00863371	0.00935477	0.0100761	0.0107976	0.0115194	0.0122414	0.0129637	0.0136862	0.014409	0.015132	0.0158552	0.0165787	0.0173024	0.0180264	0.0187506	0.0194751	0.0201998	0.0209248	0.02165	0.0223754	0.0231011	0.023827	0.0245532	0.0252796	0.0260062	0.0267331	0.0274603	0.0281877	0.0289153	0.0296432
0.9341	0.275		0.9242	0.2175		0.0555	0.2775	0	0.000713119	0.00142648	0.00214007	0.00285391	0.00356798	0.00428229	0.00499684	0.00571163	0.00642666	0.00714193	0.00785743	0.00857318	0.00928916	0.0100054	0.0107218	0.0114385	0.0121555	0.0128727	0.0135901	0.0143077	0.0150256	0.0157437	0.0164621	0.0171807	0.0178996	0.0186187	0.019338	0.0200576	0.0207774	0.0214974	0.0222177	0.0229382	0.023659	0.02438	0.0251012	0.0258227	0.0265444	0.0272664	0.0279886	0.028711	0.0294337
0.9329	0.2775		0.9218	0.215		0.056	0.28	0	0.000708197	0.00141663	0.00212529	0.00283419	0.00354332	0.00425269	0.00496229	0.00567213	0.0063822	0.0070925	0.00780304	0.00851381	0.00922482	0.00993606	0.0106475	0.0113592	0.0120712	0.0127834	0.0134958	0.0142084	0.0149213	0.0156344	0.0163478	0.0170614	0.0177752	0.0184893	0.0192035	0.0199181	0.0206328	0.0213478	0.0220631	0.0227785	0.0234942	0.0242101	0.0249263	0.0256427	0.0263594	0.0270762	0.0277933	0.0285107	0.0292283
0.9316	0.28		0.9195	0.2125		0.0565	0.2825	0	0.000703369	0.00140697	0.0021108	0.00281485	0.00351914	0.00422366	0.00492841	0.00563339	0.00633859	0.00704403	0.0077497	0.0084556	0.00916173	0.00986808	0.0105747	0.0112815	0.0119885	0.0126958	0.0134033	0.0141111	0.014819	0.0155272	0.0162357	0.0169443	0.0176532	0.0183623	0.0190717	0.0197813	0.0204911	0.0212011	0.0219114	0.0226219	0.0233326	0.0240436	0.0247548	0.0254662	0.0261779	0.0268898	0.0276019	0.0283142	0.0290268
0.9303	0.2825		0.9172	0.21		0.057	0.285	0	0.000698552	0.00139733	0.00209633	0.00279556	0.00349502	0.0041947	0.0048946	0.00559473	0.00629509	0.00699567	0.00769648	0.00839752	0.00909878	0.00980026	0.010502	0.0112039	0.0119061	0.0126085	0.0133111	0.0140139	0.014717	0.0154203	0.0161238	0.0168276	0.0175315	0.0182357	0.0189402	0.0196448	0.0203497	0.0210548	0.0217601	0.0224657	0.0231715	0.0238775	0.0245837	0.0252902	0.0259969	0.0267038	0.0274109	0.0281183	0.0288259
0.929	0.285		0.9149	0.2075		0.0575	0.2875	0	0.000693892	0.00138801	0.00208234	0.0027769	0.00347167	0.00416667	0.00486189	0.00555734	0.006253	0.00694888	0.00764499	0.00834132	0.00903787	0.00973464	0.0104316	0.0111289	0.0118263	0.012524	0.0132218	0.0139199	0.0146183	0.0153168	0.0160156	0.0167146	0.0174138	0.0181132	0.0188129	0.0195128	0.0202129	0.0209132	0.0216137	0.0223145	0.0230155	0.0237167	0.0244182	0.0251198	0.0258217	0.0265238	0.0272261	0.0279287	0.0286314
0.9276	0.2875		0.9127	0.205		0.058	0.29	0	0.000689317	0.00137885	0.0020686	0.00275857	0.00344876	0.00413916	0.00482978	0.00552062	0.00621168	0.00690295	0.00759445	0.00828616	0.00897808	0.00967023	0.0103626	0.0110552	0.011748	0.012441	0.0131342	0.0138277	0.0145213	0.0152152	0.0159093	0.0166037	0.0172982	0.017993	0.0186879	0.0193831	0.0200786	0.0207742	0.02147	0.0221661	0.0228624	0.0235589	0.0242556	0.0249526	0.0256497	0.0263471	0.0270447	0.0277425	0.0284406
0.9261	0.29		0.9105	0.2025		0.0585	0.2925	0	0.000684825	0.00136986	0.00205511	0.00274058	0.00342626	0.00411215	0.00479826	0.00548457	0.00617111	0.00685785	0.00754481	0.00823199	0.00891938	0.00960698	0.0102948	0.0109828	0.0116711	0.0123595	0.0130482	0.0137371	0.0144262	0.0151155	0.015805	0.0164948	0.0171847	0.0178749	0.0185653	0.0192559	0.0199467	0.0206377	0.021329	0.0220204	0.0227121	0.023404	0.0240961	0.0247884	0.0254809	0.0261736	0.0268666	0.0275598	0.0282532
0.9246	0.2925		0.9083	0.2		0.059	0.295	0	0.000680413	0.00136103	0.00204187	0.00272291	0.00340416	0.00408562	0.00476729	0.00544917	0.00613126	0.00681356	0.00749607	0.00817879	0.00886171	0.00954485	0.0102282	0.0109118	0.0115955	0.0122795	0.0129637	0.0136481	0.0143327	0.0150175	0.0157026	0.0163878	0.0170733	0.0177589	0.0184448	0.0191309	0.0198172	0.0205037	0.0211904	0.0218773	0.0225644	0.0232518	0.0239393	0.0246271	0.0253151	0.0260033	0.0266917	0.0273803	0.0280691
0.923	0.295		0.9061	0.1975		0.0595	0.2975	0	0.000676077	0.00135236	0.00202885	0.00270554	0.00338244	0.00405955	0.00473686	0.00541438	0.00609211	0.00677004	0.00744817	0.00812651	0.00880506	0.00948382	0.0101628	0.0108419	0.0115213	0.0122009	0.0128807	0.0135607	0.0142409	0.0149213	0.0156019	0.0162827	0.0169637	0.017645	0.0183264	0.019008	0.0196899	0.020372	0.0210542	0.0217367	0.0224194	0.0231023	0.0237854	0.0244687	0.0251522	0.0258359	0.0265198	0.0272039	0.0278883
0.9213	0.2975		0.904	0.195		0.06	0.3	0	0.000671816	0.00134383	0.00201606	0.00268848	0.0033611	0.00403393	0.00470696	0.00538019	0.00605362	0.00672726	0.0074011	0.00807514	0.00874938	0.00942382	0.0100985	0.0107733	0.0114484	0.0121236	0.0127991	0.0134747	0.0141506	0.0148267	0.0155029	0.0161794	0.0168561	0.017533	0.0182101	0.0188873	0.0195648	0.0202425	0.0209204	0.0215985	0.0222768	0.0229553	0.023634	0.0243129	0.024992	0.0256713	0.0263509	0.0270306	0.0277105
0.9195	0.3		0.902	0.1925		0.0605	0.3025	0	0.000667626	0.00133545	0.00200347	0.0026717	0.00334012	0.00400873	0.00467755	0.00534657	0.00601578	0.00668519	0.0073548	0.00802461	0.00869462	0.00936483	0.0100352	0.0107058	0.0113766	0.0120477	0.0127189	0.0133903	0.0140619	0.0147337	0.0154057	0.0160779	0.0167503	0.0174228	0.0180956	0.0187686	0.0194418	0.0201152	0.0207888	0.0214626	0.0221366	0.0228108	0.0234852	0.0241598	0.0248346	0.0255096	0.0261848	0.0268602	0.0275357
0.9176	0.3025		0.8999	0.19		0.061	0.305	0	0.000663504	0.0013272	0.0019911	0.00265518	0.00331947	0.00398394	0.00464862	0.00531349	0.00597855	0.00664381	0.00730926	0.00797491	0.00864075	0.00930679	0.00997302	0.0106395	0.0113061	0.0119729	0.0126399	0.0133071	0.0139745	0.0146421	0.0153099	0.0159779	0.0166461	0.0173145	0.0179831	0.0186519	0.0193208	0.01999	0.0206594	0.0213289	0.0219987	0.0226686	0.0233388	0.0240091	0.0246797	0.0253504	0.0260213	0.0266925	0.0273638
0.9156	0.305		0.8979	0.1875		0.0615	0.3075	0	0.000659445	0.00131908	0.00197891	0.00263893	0.00329914	0.00395954	0.00462013	0.00528092	0.00594189	0.00660306	0.00726442	0.00792597	0.00858772	0.00924965	0.00991178	0.0105741	0.0112366	0.0118993	0.0125622	0.0132253	0.0138886	0.014552	0.0152157	0.0158796	0.0165436	0.0172078	0.0178723	0.0185369	0.0192017	0.0198667	0.0205319	0.0211973	0.0218629	0.0225287	0.0231947	0.0238608	0.0245272	0.0251937	0.0258605	0.0265274	0.0271945
0.9134	0.3075		0.8959	0.185		0.062	0.31	0	0.000655446	0.00131108	0.0019669	0.00262291	0.00327911	0.0039355	0.00459207	0.00524883	0.00590578	0.00656292	0.00722025	0.00787776	0.00853546	0.00919335	0.00985143	0.0105097	0.0111682	0.0118268	0.0124856	0.0131447	0.0138039	0.0144633	0.0151229	0.0157826	0.0164426	0.0171028	0.0177631	0.0184236	0.0190844	0.0197453	0.0204064	0.0210677	0.0217291	0.0223908	0.0230527	0.0237147	0.0243769	0.0250394	0.025702	0.0263648	0.0270278
0.9112	0.31		0.894	0.1825		0.0625	0.3125	0	0.000651503	0.00130319	0.00195506	0.00260712	0.00325936	0.00391178	0.00456439	0.00521719	0.00587017	0.00652333	0.00717668	0.00783022	0.00848394	0.00913784	0.00979193	0.0104462	0.0111007	0.0117553	0.0124101	0.0130652	0.0137204	0.0143757	0.0150313	0.0156871	0.016343	0.0169991	0.0176555	0.018312	0.0189686	0.0196255	0.0202826	0.0209398	0.0215972	0.0222548	0.0229126	0.0235706	0.0242288	0.0248872	0.0255457	0.0262044	0.0268634
0.9087	0.3125		0.8921	0.18		0.063	0.315	0	0.00064761	0.0012954	0.00194337	0.00259153	0.00323986	0.00388838	0.00453707	0.00518595	0.00583501	0.00648426	0.00713368	0.00778328	0.00843307	0.00908304	0.00973319	0.0103835	0.011034	0.0116847	0.0123356	0.0129867	0.0136379	0.0142893	0.0149409	0.0155927	0.0162447	0.0168969	0.0175492	0.0182017	0.0188544	0.0195073	0.0201604	0.0208136	0.021467	0.0221206	0.0227744	0.0234284	0.0240826	0.0247369	0.0253915	0.0260462	0.0267011
0.906	0.315		0.8902	0.1775		0.0635	0.3175	0	0.000643762	0.0012877	0.00193182	0.00257612	0.00322059	0.00386524	0.00451007	0.00515508	0.00580027	0.00644563	0.00709117	0.0077369	0.0083828	0.00902887	0.00967513	0.0103216	0.0109682	0.011615	0.0122619	0.0129091	0.0135564	0.0142039	0.0148516	0.0154995	0.0161475	0.0167958	0.0174442	0.0180927	0.0187415	0.0193904	0.0200396	0.0206889	0.0213383	0.021988	0.0226378	0.0232879	0.0239381	0.0245884	0.025239	0.0258897	0.0265406
0.9031	0.3175		0.8884	0.175		0.064	0.32	0	0.000639953	0.00128008	0.00192038	0.00256086	0.00320151	0.00384234	0.00448334	0.00512452	0.00576587	0.0064074	0.0070491	0.00769098	0.00833303	0.00897526	0.00961766	0.0102602	0.010903	0.0115459	0.012189	0.0128323	0.0134758	0.0141194	0.0147632	0.0154072	0.0160514	0.0166957	0.0173402	0.0179849	0.0186298	0.0192748	0.01992	0.0205654	0.021211	0.0218567	0.0225026	0.0231487	0.023795	0.0244415	0.0250881	0.0257349	0.0263819
0.8998	0.32		0.8867	0.1725		0.0645	0.3225	0	0.000636175	0.00127252	0.00190904	0.00254573	0.00318259	0.00381963	0.00445683	0.00509421	0.00573176	0.00636948	0.00700737	0.00764544	0.00828368	0.00892209	0.00956067	0.0101994	0.0108384	0.0114774	0.0121167	0.0127562	0.0133958	0.0140356	0.0146755	0.0153157	0.015956	0.0165965	0.0172371	0.0178779	0.0185189	0.0191601	0.0198015	0.020443	0.0210847	0.0217265	0.0223686	0.0230108	0.0236532	0.0242957	0.0249385	0.0255814	0.0262245
0.8962	0.3225		0.8849	0.17		0.065	0.325	0	0.000632421	0.00126501	0.00189777	0.00253069	0.00316379	0.00379705	0.00443049	0.00506409	0.00569786	0.0063318	0.00696591	0.00760018	0.00823463	0.00886925	0.00950403	0.010139	0.0107741	0.0114094	0.0120449	0.0126805	0.0133163	0.0139523	0.0145884	0.0152247	0.0158612	0.0164979	0.0171347	0.0177717	0.0184088	0.0190462	0.0196837	0.0203213	0.0209592	0.0215972	0.0222354	0.0228737	0.0235122	0.0241509	0.0247898	0.0254288	0.026068
0.892	0.325		0.8833	0.1675		0.0655	0.3275	0	0.00062868	0.00125753	0.00188654	0.00251572	0.00314506	0.00377457	0.00440424	0.00503408	0.00566409	0.00629426	0.0069246	0.0075551	0.00818578	0.00881661	0.00944762	0.0100788	0.0107101	0.0113416	0.0119733	0.0126051	0.0132371	0.0138693	0.0145016	0.0151341	0.0157668	0.0163996	0.0170326	0.0176658	0.0182992	0.0189327	0.0195663	0.0202002	0.0208342	0.0214684	0.0221027	0.0227372	0.0233719	0.0240067	0.0246417	0.0252769	0.0259123
0.8871	0.3275		0.8817	0.165		0.066	0.33	0	0.000624943	0.00125005	0.00187532	0.00250075	0.00312634	0.0037521	0.00437802	0.0050041	0.00563035	0.00625676	0.00688333	0.00751007	0.00813697	0.00876403	0.00939125	0.0100186	0.0106462	0.0112739	0.0119018	0.0125298	0.013158	0.0137864	0.0144149	0.0150436	0.0156725	0.0163015	0.0169307	0.0175601	0.0181896	0.0188193	0.0194491	0.0200791	0.0207093	0.0213397	0.0219702	0.0226008	0.0232317	0.0238627	0.0244938	0.0251252	0.0257567
0.8809	0.33		0.8802	0.1625		0.0665	0.3325	0	0.000621197	0.00124255	0.00186407	0.00248575	0.00310758	0.00372958	0.00435174	0.00497405	0.00559653	0.00621917	0.00684197	0.00746492	0.00808804	0.00871132	0.00933476	0.00995836	0.0105821	0.011206	0.0118301	0.0124544	0.0130788	0.0137033	0.0143281	0.0149529	0.015578	0.0162032	0.0168286	0.0174541	0.0180798	0.0187057	0.0193317	0.0199578	0.0205842	0.0212107	0.0218373	0.0224642	0.0230912	0.0237183	0.0243456	0.0249731	0.0256007
0.8724	0.3325		0.8787	0.16		0.067	0.335	0	0.000617428	0.00123501	0.00185275	0.00247065	0.00308871	0.00370692	0.00432529	0.00494382	0.00556251	0.00618135	0.00680035	0.00741951	0.00803882	0.0086583	0.00927793	0.00989771	0.0105177	0.0111378	0.011758	0.0123784	0.012999	0.0136198	0.0142407	0.0148617	0.0154829	0.0161043	0.0167258	0.0173475	0.0179694	0.0185914	0.0192135	0.0198358	0.0204583	0.021081	0.0217038	0.0223267	0.0229498	0.0235731	0.0241965	0.0248201	0.0254439
0.8522	0.335		0.8773	0.1575		0.0675	0.3375	0	0.000613619	0.00122739	0.00184132	0.0024554	0.00306964	0.00368403	0.00429858	0.00491328	0.00552813	0.00614314	0.0067583	0.00737362	0.0079891	0.00860472	0.00922051	0.00983645	0.0104525	0.0110688	0.0116852	0.0123018	0.0129185	0.0135353	0.0141524	0.0147695	0.0153869	0.0160044	0.016622	0.0172398	0.0178578	0.0184759	0.0190942	0.0197126	0.0203312	0.0209499	0.0215688	0.0221879	0.0228071	0.0234265	0.024046	0.0246657	0.0252855
0.8448	0.335		0.876	0.155		0.068	0.34	0	0.000609753	0.00121966	0.00182971	0.00243992	0.00305028	0.00366079	0.00427146	0.00488227	0.00549324	0.00610436	0.00671563	0.00732705	0.00793863	0.00855035	0.00916223	0.00977426	0.0103864	0.0109988	0.0116113	0.0122239	0.0128367	0.0134497	0.0140628	0.014676	0.0152894	0.015903	0.0165167	0.0171306	0.0177446	0.0183588	0.0189731	0.0195876	0.0202022	0.020817	0.0214319	0.022047	0.0226623	0.0232777	0.0238932	0.0245089	0.0251248
0.82	0.3325		0.8748	0.1525		0.0685	0.3425	0	0.000605809	0.00121177	0.00181787	0.00242413	0.00303053	0.00363709	0.00424379	0.00485064	0.00545765	0.0060648	0.0066721	0.00727955	0.00788715	0.0084949	0.00910279	0.00971084	0.010319	0.0109274	0.0115359	0.0121445	0.0127533	0.0133623	0.0139714	0.0145806	0.01519	0.0157996	0.0164093	0.0170191	0.0176291	0.0182393	0.0188496	0.01946	0.0200706	0.0206814	0.0212923	0.0219034	0.0225146	0.0231259	0.0237374	0.0243491	0.0249609
0.8068	0.33		0.8736	0.15		0.069	0.345	0	0.000601764	0.00120368	0.00180573	0.00240794	0.00301029	0.00361278	0.00421542	0.00481821	0.00542115	0.00602423	0.00662746	0.00723084	0.00783436	0.00843803	0.00904185	0.00964582	0.0102499	0.0108542	0.0114586	0.0120632	0.0126679	0.0132727	0.0138777	0.0144828	0.0150881	0.0156936	0.0162992	0.0169049	0.0175108	0.0181168	0.018723	0.0193293	0.0199358	0.0205424	0.0211492	0.0217561	0.0223632	0.0229704	0.0235778	0.0241853	0.024793
0.796	0.3275		0.8724	0.1475		0.0695	0.3475	0	0.000597594	0.00119533	0.00179321	0.00239124	0.00298941	0.00358772	0.00418618	0.00478478	0.00538353	0.00598242	0.00658145	0.00718063	0.00777996	0.00837943	0.00897904	0.0095788	0.0101787	0.0107787	0.0113789	0.0119793	0.0125798	0.0131804	0.0137812	0.0143821	0.0149831	0.0155843	0.0161857	0.0167872	0.0173888	0.0179906	0.0185926	0.0191947	0.0197969	0.0203993	0.0210018	0.0216044	0.0222073	0.0228102	0.0234133	0.0240166	0.02462
0.7864	0.325		0.8713	0.145		0.07	0.35	0	0.000593273	0.00118669	0.00178024	0.00237394	0.00296778	0.00356176	0.00415588	0.00475014	0.00534455	0.00593909	0.00653378	0.00712861	0.00772359	0.0083187	0.00891396	0.00950936	0.0101049	0.0107006	0.0112964	0.0118924	0.0124885	0.0130847	0.0136811	0.0142777	0.0148744	0.0154712	0.0160682	0.0166653	0.0172625	0.0178599	0.0184575	0.0190552	0.019653	0.020251	0.0208491	0.0214473	0.0220457	0.0226443	0.023243	0.0238418	0.0244408
0.7776	0.3225		0.8702	0.1425		0.0705	0.3525	0	0.000588773	0.00117769	0.00176674	0.00235593	0.00294525	0.00353472	0.00412433	0.00471408	0.00530396	0.00589399	0.00648415	0.00707446	0.0076649	0.00825549	0.00884621	0.00943707	0.0100281	0.0106192	0.0112105	0.0118019	0.0123935	0.0129852	0.013577	0.014169	0.0147612	0.0153534	0.0159458	0.0165384	0.0171311	0.0177239	0.0183169	0.01891	0.0195032	0.0200966	0.0206902	0.0212839	0.0218777	0.0224716	0.0230657	0.02366	0.0242544
0.7693	0.32		0.8691	0.14		0.071	0.355	0	0.000584068	0.00116827	0.00175261	0.00233709	0.0029217	0.00350646	0.00409134	0.00467637	0.00526153	0.00584683	0.00643227	0.00701784	0.00760355	0.0081894	0.00877539	0.00936151	0.00994777	0.0105342	0.0111207	0.0117074	0.0122942	0.0128811	0.0134682	0.0140555	0.0146428	0.0152303	0.015818	0.0164058	0.0169937	0.0175817	0.0181699	0.0187583	0.0193468	0.0199354	0.0205241	0.021113	0.021702	0.0222912	0.0228805	0.02347	0.0240596
0.7614	0.3175		0.868	0.1375		0.0715	0.3575	0	0.000579132	0.0011584	0.0017378	0.00231733	0.002897	0.00347681	0.00405675	0.00463682	0.00521703	0.00579737	0.00637785	0.00695846	0.00753921	0.00812009	0.00870111	0.00928227	0.00986356	0.010445	0.0110265	0.0116082	0.0121901	0.012772	0.0133541	0.0139364	0.0145188	0.0151013	0.0156839	0.0162667	0.0168496	0.0174327	0.0180159	0.0185992	0.0191827	0.0197663	0.02035	0.0209339	0.0215179	0.0221021	0.0226864	0.0232708	0.0238554
0.7538	0.315		0.8668	0.135		0.072	0.36	0	0.000573944	0.00114802	0.00172223	0.00229657	0.00287104	0.00344565	0.00402039	0.00459526	0.00517026	0.00574539	0.00632066	0.00689606	0.0074716	0.00804727	0.00862307	0.009199	0.00977507	0.0103513	0.0109276	0.0115041	0.0120807	0.0126574	0.0132343	0.0138113	0.0143884	0.0149657	0.0155431	0.0161206	0.0166983	0.0172761	0.0178541	0.0184321	0.0190104	0.0195887	0.0201672	0.0207458	0.0213246	0.0219035	0.0224825	0.0230616	0.0236409
0.7464	0.3125		0.8655	0.1325		0.0725	0.3625	0	0.000568489	0.00113711	0.00170586	0.00227474	0.00284375	0.00341288	0.00398215	0.00455155	0.00512109	0.00569075	0.00626054	0.00683046	0.00740052	0.0079707	0.00854102	0.00911147	0.00968204	0.0102528	0.0108236	0.0113946	0.0119657	0.0125369	0.0131083	0.0136798	0.0142514	0.0148232	0.0153951	0.0159671	0.0165393	0.0171116	0.017684	0.0182565	0.0188292	0.0194021	0.019975	0.0205481	0.0211213	0.0216947	0.0222682	0.0228418	0.0234156
0.7392	0.31		0.8641	0.13		0.073	0.365	0	0.00056276	0.00112565	0.00168866	0.00225181	0.00281508	0.00337848	0.003942	0.00450566	0.00506945	0.00563336	0.0061974	0.00676157	0.00732587	0.0078903	0.00845486	0.00901955	0.00958437	0.0101493	0.0107144	0.0112796	0.0118449	0.0124104	0.012976	0.0135417	0.0141076	0.0146736	0.0152397	0.0158059	0.0163723	0.0169388	0.0175054	0.0180722	0.0186391	0.0192061	0.0197733	0.0203406	0.020908	0.0214756	0.0220433	0.0226111	0.023179
0.7322	0.3075		0.8626	0.1275		0.0735	0.3675	0	0.00055676	0.00111365	0.00167066	0.00222779	0.00278506	0.00334245	0.00389996	0.00445761	0.00501538	0.00557327	0.0061313	0.00668945	0.00724772	0.00780613	0.00836466	0.00892332	0.0094821	0.010041	0.0106001	0.0111592	0.0117185	0.012278	0.0128375	0.0133972	0.013957	0.0145169	0.015077	0.0156372	0.0161975	0.016758	0.0173186	0.0178793	0.0184401	0.0190011	0.0195622	0.0201234	0.0206848	0.0212462	0.0218079	0.0223696	0.0229315
0.7254	0.305		0.8609	0.125		0.074	0.37	0	0.000550507	0.00110114	0.00165189	0.00220277	0.00275377	0.0033049	0.00385615	0.00440753	0.00495903	0.00551066	0.00606241	0.00661429	0.00716629	0.00771841	0.00827067	0.00882304	0.00937555	0.00992818	0.0104809	0.0110338	0.0115868	0.01214	0.0126932	0.0132466	0.0138001	0.0143538	0.0149075	0.0154614	0.0160154	0.0165696	0.0171239	0.0176783	0.0182328	0.0187874	0.0193422	0.0198971	0.0204522	0.0210073	0.0215626	0.0221181	0.0226736
0.7186	0.3025		0.859	0.1225		0.0745	0.3725	0	0.000544032	0.00108819	0.00163246	0.00217686	0.00272138	0.00326602	0.00381079	0.00435568	0.00490069	0.00544583	0.00599109	0.00653647	0.00708197	0.0076276	0.00817336	0.00871923	0.00926523	0.00981136	0.0103576	0.010904	0.0114505	0.0119971	0.0125438	0.0130907	0.0136377	0.0141848	0.0147321	0.0152795	0.0158269	0.0163746	0.0169223	0.0174702	0.0180182	0.0185663	0.0191146	0.0196629	0.0202115	0.0207601	0.0213088	0.0218577	0.0224067
0.712	0.3		0.857	0.12		0.075	0.375	0	0.000537381	0.00107488	0.0016125	0.00215025	0.00268811	0.00322609	0.0037642	0.00430242	0.00484077	0.00537924	0.00591783	0.00645654	0.00699538	0.00753433	0.00807341	0.00861261	0.00915193	0.00969138	0.0102309	0.0107706	0.0113104	0.0118504	0.0123904	0.0129306	0.0134709	0.0140114	0.0145519	0.0150926	0.0156334	0.0161743	0.0167154	0.0172565	0.0177978	0.0183392	0.0188808	0.0194225	0.0199643	0.0205062	0.0210482	0.0215904	0.0221327
0.7054	0.2975		0.8549	0.1175		0.0755	0.3775	0	0.000530612	0.00106134	0.00159219	0.00212316	0.00265425	0.00318546	0.00371678	0.00424823	0.00477979	0.00531148	0.00584328	0.00637521	0.00690725	0.00743942	0.00797171	0.00850411	0.00903664	0.00956929	0.0101021	0.010635	0.011168	0.0117011	0.0122344	0.0127677	0.0133012	0.0138348	0.0143686	0.0149025	0.0154364	0.0159705	0.0165048	0.0170391	0.0175736	0.0181082	0.0186429	0.0191778	0.0197128	0.0202478	0.0207831	0.0213184	0.0218539
0.699	0.295		0.8526	0.115		0.076	0.38	0	0.000523793	0.0010477	0.00157173	0.00209588	0.00262014	0.00314452	0.00366902	0.00419363	0.00471837	0.00524322	0.00576819	0.00629328	0.00681849	0.00734381	0.00786926	0.00839482	0.00892051	0.00944631	0.00997223	0.0104983	0.0110244	0.0115507	0.0120771	0.0126036	0.0131303	0.0136571	0.0141839	0.0147109	0.0152381	0.0157653	0.0162927	0.0168202	0.0173478	0.0178755	0.0184034	0.0189313	0.0194594	0.0199877	0.020516	0.0210445	0.0215731
0.6926	0.2925		0.8501	0.1125		0.0765	0.3825	0	0.000516997	0.00103411	0.00155134	0.00206868	0.00258614	0.00310372	0.00362141	0.00413922	0.00465715	0.00517519	0.00569335	0.00621163	0.00673002	0.00724853	0.00776716	0.00828591	0.00880477	0.00932375	0.00984285	0.0103621	0.0108814	0.0114009	0.0119204	0.0124401	0.0129599	0.0134799	0.0139999	0.0145201	0.0150404	0.0155608	0.0160813	0.016602	0.0171227	0.0176436	0.0181646	0.0186858	0.019207	0.0197284	0.0202499	0.0207715	0.0212932
0.6862	0.29		0.8475	0.11		0.077	0.385	0	0.000510296	0.00102071	0.00153123	0.00204187	0.00255263	0.00306349	0.00357448	0.00408558	0.00459679	0.00510812	0.00561956	0.00613112	0.0066428	0.00715459	0.0076665	0.00817853	0.00869067	0.00920292	0.0097153	0.0102278	0.0107404	0.0112531	0.011766	0.0122789	0.012792	0.0133052	0.0138185	0.0143319	0.0148455	0.0153592	0.0158729	0.0163869	0.0169009	0.017415	0.0179293	0.0184437	0.0189582	0.0194728	0.0199875	0.0205024	0.0210174
0.6799	0.2875		0.8448	0.1075		0.0775	0.3875	0	0.000503759	0.00100763	0.00151162	0.00201571	0.00251993	0.00302425	0.00352869	0.00403324	0.00453791	0.00504269	0.00554758	0.00605259	0.00655771	0.00706295	0.0075683	0.00807377	0.00857935	0.00908505	0.00959086	0.0100968	0.0106028	0.011109	0.0116153	0.0121217	0.0126282	0.0131348	0.0136415	0.0141484	0.0146554	0.0151625	0.0156697	0.016177	0.0166844	0.017192	0.0176997	0.0182075	0.0187154	0.0192234	0.0197316	0.0202399	0.0207482
0.6737	0.285		0.842	0.105		0.078	0.39	0	0.000497445	0.000995	0.00149267	0.00199045	0.00248834	0.00298634	0.00348446	0.00398268	0.00448102	0.00497948	0.00547804	0.00597672	0.00647551	0.00697441	0.00747343	0.00797256	0.00847181	0.00897117	0.00947064	0.00997023	0.0104699	0.0109697	0.0114697	0.0119697	0.0124699	0.0129702	0.0134706	0.0139711	0.0144717	0.0149724	0.0154733	0.0159743	0.0164753	0.0169765	0.0174779	0.0179793	0.0184809	0.0189825	0.0194843	0.0199862	0.0204883
0.6675	0.2825		0.839	0.1025		0.0785	0.3925	0	0.000491398	0.000982905	0.00147452	0.00196625	0.00245809	0.00295004	0.0034421	0.00393427	0.00442655	0.00491895	0.00541145	0.00590407	0.0063968	0.00688964	0.00738259	0.00787566	0.00836883	0.00886212	0.00935553	0.00984904	0.0103427	0.0108364	0.0113303	0.0118242	0.0123183	0.0128125	0.0133068	0.0138013	0.0142958	0.0147905	0.0152852	0.0157801	0.0162751	0.0167702	0.0172655	0.0177608	0.0182563	0.0187519	0.0192475	0.0197434	0.0202393
0.6613	0.28		0.836	0.1		0.079	0.395	0	0.000485651	0.000971411	0.00145728	0.00194326	0.00242934	0.00291554	0.00340184	0.00388826	0.00437479	0.00486142	0.00534817	0.00583502	0.00632199	0.00680907	0.00729625	0.00778355	0.00827096	0.00875849	0.00924612	0.00973387	0.0102217	0.0107097	0.0111978	0.011686	0.0121743	0.0126627	0.0131512	0.0136399	0.0141286	0.0146175	0.0151065	0.0155956	0.0160848	0.0165741	0.0170636	0.0175531	0.0180428	0.0185326	0.0190225	0.0195125	0.0200027
0.6552	0.2775		0.8329	0.0975		0.0795	0.3975	0	0.000480223	0.000960553	0.00144099	0.00192154	0.00240219	0.00288295	0.00336382	0.0038448	0.00432589	0.00480708	0.00528839	0.0057698	0.00625133	0.00673296	0.0072147	0.00769655	0.00817852	0.00866059	0.00914277	0.00962507	0.0101075	0.01059	0.0110726	0.0115554	0.0120382	0.0125212	0.0130042	0.0134874	0.0139707	0.0144541	0.0149376	0.0154213	0.015905	0.0163889	0.0168729	0.017357	0.0178412	0.0183255	0.0188099	0.0192944	0.0197791
0.6492	0.275		0.8297	0.095		0.08	0.4	0	0.000475119	0.000950345	0.00142568	0.00190112	0.00237666	0.00285231	0.00332807	0.00380394	0.00427991	0.00475599	0.00523218	0.00570848	0.00618488	0.0066614	0.00713802	0.00761475	0.00809159	0.00856854	0.00904559	0.00952276	0.01	0.0104774	0.0109549	0.0114325	0.0119102	0.0123881	0.012866	0.0133441	0.0138222	0.0143005	0.0147789	0.0152574	0.015736	0.0162147	0.0166935	0.0171725	0.0176515	0.0181307	0.01861	0.0190894	0.0195689
0.6431	0.2725		0.8264	0.0925		0.0805	0.4025	0	0.000470335	0.000940776	0.00141132	0.00188197	0.00235273	0.00282359	0.00329456	0.00376563	0.00423681	0.0047081	0.00517949	0.00565099	0.0061226	0.00659431	0.00706613	0.00753806	0.0080101	0.00848224	0.00895449	0.00942685	0.00989932	0.0103719	0.0108446	0.0113174	0.0117903	0.0122633	0.0127364	0.0132097	0.013683	0.0141564	0.01463	0.0151037	0.0155775	0.0160514	0.0165254	0.0169995	0.0174737	0.0179481	0.0184225	0.0188971	0.0193717
0.6371	0.27		0.8231	0.09		0.081	0.405	0	0.000465858	0.00093182	0.00139789	0.00186406	0.00233033	0.00279671	0.00326319	0.00372978	0.00419647	0.00466327	0.00513018	0.00559718	0.0060643	0.00653152	0.00699885	0.00746628	0.00793382	0.00840147	0.00886922	0.00933708	0.00980505	0.0102731	0.0107413	0.0112096	0.011678	0.0121465	0.0126151	0.0130838	0.0135527	0.0140216	0.0144907	0.0149598	0.0154291	0.0158985	0.016368	0.0168376	0.0173073	0.0177771	0.018247	0.0187171	0.0191872
0.631	0.2675		0.8197	0.0875		0.0815	0.4075	0	0.000461669	0.00092344	0.00138531	0.00184729	0.00230937	0.00277155	0.00323384	0.00369623	0.00415873	0.00462132	0.00508403	0.00554683	0.00600974	0.00647276	0.00693588	0.00739911	0.00786244	0.00832588	0.00878942	0.00925307	0.00971682	0.0101807	0.0106447	0.0111087	0.0115729	0.0120372	0.0125016	0.0129661	0.0134307	0.0138954	0.0143603	0.0148252	0.0152902	0.0157554	0.0162206	0.016686	0.0171515	0.0176171	0.0180828	0.0185486	0.0190145
0.625	0.265		0.8163	0.085		0.082	0.41	0	0.000457745	0.000915591	0.00137354	0.00183159	0.00228974	0.00274799	0.00320635	0.00366481	0.00412337	0.00458203	0.0050408	0.00549967	0.00595864	0.00641772	0.0068769	0.00733618	0.00779557	0.00825507	0.00871466	0.00917437	0.00963418	0.0100941	0.0105541	0.0110142	0.0114745	0.0119348	0.0123952	0.0128558	0.0133164	0.0137772	0.0142381	0.014699	0.0151601	0.0156213	0.0160826	0.016544	0.0170055	0.0174672	0.0179289	0.0183907	0.0188527
0.619	0.2625		0.8128	0.0825		0.0825	0.4125	0	0.000454062	0.000908224	0.00136249	0.00181685	0.00227131	0.00272588	0.00318055	0.00363531	0.00409018	0.00454515	0.00500022	0.0054554	0.00591068	0.00636606	0.00682154	0.00727712	0.00773281	0.0081886	0.0086445	0.0091005	0.0095566	0.0100128	0.0104691	0.0109255	0.011382	0.0118387	0.0122954	0.0127522	0.0132092	0.0136662	0.0141234	0.0145806	0.015038	0.0154955	0.015953	0.0164107	0.0168685	0.0173264	0.0177844	0.0182425	0.0187008
0.6131	0.26		0.8092	0.08		0.083	0.415	0	0.000450596	0.000901292	0.00135209	0.00180298	0.00225397	0.00270507	0.00315626	0.00360755	0.00405895	0.00451044	0.00496204	0.00541373	0.00586553	0.00631743	0.00676943	0.00722153	0.00767374	0.00812604	0.00857845	0.00903096	0.00948358	0.00993629	0.0103891	0.010842	0.0112951	0.0117482	0.0122014	0.0126548	0.0131082	0.0135618	0.0140154	0.0144692	0.014923	0.015377	0.0158311	0.0162852	0.0167395	0.0171939	0.0176484	0.018103	0.0185577
0.6072	0.2575		0.8056	0.0775		0.0835	0.4175	0	0.000447323	0.000894745	0.00134226	0.00178988	0.0022376	0.00268541	0.00313333	0.00358134	0.00402945	0.00447766	0.00492597	0.00537438	0.0058229	0.00627151	0.00672022	0.00716903	0.00761794	0.00806696	0.00851607	0.00896529	0.00941461	0.00986403	0.0103136	0.0107632	0.0112129	0.0116627	0.0121127	0.0125627	0.0130128	0.0134631	0.0139134	0.0143639	0.0148144	0.0152651	0.0157159	0.0161667	0.0166177	0.0170688	0.01752	0.0179712	0.0184226
0.6013	0.255		0.8019	0.075		0.084	0.42	0	0.000444221	0.000888539	0.00133295	0.00177747	0.00222208	0.00266678	0.00311159	0.00355649	0.00400149	0.00444659	0.00489179	0.00533709	0.00578248	0.00622798	0.00667357	0.00711926	0.00756506	0.00801095	0.00845694	0.00890304	0.00934923	0.00979553	0.0102419	0.0106884	0.011135	0.0115817	0.0120285	0.0124754	0.0129224	0.0133695	0.0138168	0.0142641	0.0147115	0.015159	0.0156066	0.0160544	0.0165022	0.0169501	0.0173982	0.0178463	0.0182946
0.5955	0.2525		0.7982	0.0725		0.0845	0.4225	0	0.000441269	0.000882634	0.00132409	0.00176565	0.0022073	0.00264905	0.0030909	0.00353284	0.00397488	0.00441702	0.00485926	0.00530159	0.00574402	0.00618655	0.00662918	0.0070719	0.00751472	0.00795765	0.00840067	0.00884379	0.00928701	0.00973033	0.0101738	0.0106173	0.0110609	0.0115046	0.0119484	0.0123924	0.0128364	0.0132805	0.0137247	0.0141691	0.0146135	0.015058	0.0155027	0.0159474	0.0163922	0.0168372	0.0172822	0.0177274	0.0181726
0.5898	0.25		0.7944	0.07		0.085	0.425	0	0.000438449	0.000876992	0.00131563	0.00175436	0.00219319	0.00263212	0.00307114	0.00351025	0.00394946	0.00438877	0.00482817	0.00526767	0.00570727	0.00614697	0.00658676	0.00702665	0.00746663	0.00790672	0.0083469	0.00878718	0.00922756	0.00966804	0.0101086	0.0105493	0.0109901	0.0114309	0.0118719	0.012313	0.0127542	0.0131954	0.0136368	0.0140783	0.0145199	0.0149615	0.0154033	0.0158452	0.0162872	0.0167293	0.0171714	0.0176137	0.0180561
0.584	0.2475		0.7906	0.0675		0.0855	0.4275	0	0.000435744	0.000871581	0.00130751	0.00174354	0.00217966	0.00261587	0.00305218	0.00348858	0.00392508	0.00436167	0.00479836	0.00523514	0.00567202	0.006109	0.00654607	0.00698324	0.0074205	0.00785786	0.00829532	0.00873288	0.00917053	0.00960828	0.0100461	0.0104841	0.0109221	0.0113603	0.0117985	0.0122368	0.0126753	0.0131138	0.0135525	0.0139912	0.01443	0.014869	0.015308	0.0157471	0.0161864	0.0166257	0.0170652	0.0175047	0.0179444
0.5783	0.245		0.7867	0.065		0.086	0.43	0	0.000433139	0.000866371	0.0012997	0.00173311	0.00216662	0.00260023	0.00303393	0.00346772	0.0039016	0.00433558	0.00476965	0.00520382	0.00563808	0.00607244	0.00650689	0.00694144	0.00737609	0.00781082	0.00824566	0.00868059	0.00911562	0.00955074	0.00998596	0.0104213	0.0108567	0.0112922	0.0117278	0.0121635	0.0125993	0.0130352	0.0134712	0.0139073	0.0143435	0.0147798	0.0152162	0.0156527	0.0160893	0.016526	0.0169628	0.0173997	0.0178367
0.5727	0.2425		0.7827	0.0625		0.0865	0.4325	0	0.000430623	0.000861338	0.00129214	0.00172304	0.00215403	0.00258512	0.00301629	0.00344756	0.00387892	0.00431037	0.00474192	0.00517356	0.00560529	0.00603712	0.00646904	0.00690106	0.00733317	0.00776538	0.00819768	0.00863007	0.00906256	0.00949515	0.00992783	0.0103606	0.0107935	0.0112265	0.0116595	0.0120927	0.0125259	0.0129593	0.0133928	0.0138263	0.01426	0.0146937	0.0151276	0.0155615	0.0159956	0.0164297	0.0168639	0.0172983	0.0177327
0.567	0.24		0.7787	0.06		0.087	0.435	0	0.000428184	0.000856459	0.00128482	0.00171328	0.00214183	0.00257047	0.0029992	0.00342802	0.00385693	0.00428594	0.00471504	0.00514423	0.00557351	0.00600289	0.00643235	0.00686192	0.00729157	0.00772132	0.00815117	0.0085811	0.00901114	0.00944126	0.00987148	0.0103018	0.0107322	0.0111627	0.0115933	0.012024	0.0124548	0.0128857	0.0133167	0.0137478	0.014179	0.0146102	0.0150416	0.0154731	0.0159047	0.0163363	0.0167681	0.0172	0.0176319
0.5615	0.2375		0.7746	0.0575		0.0875	0.4375	0	0.000425814	0.000851716	0.00127771	0.00170379	0.00212996	0.00255623	0.00298258	0.00340902	0.00383556	0.00426218	0.0046889	0.00511571	0.00554261	0.0059696	0.00639669	0.00682386	0.00725113	0.00767849	0.00810595	0.0085335	0.00896114	0.00938887	0.0098167	0.0102446	0.0106726	0.0111008	0.011529	0.0119573	0.0123857	0.0128141	0.0132427	0.0136714	0.0141002	0.0145291	0.014958	0.0153871	0.0158163	0.0162455	0.0166749	0.0171043	0.0175339
0.5559	0.235		0.7705	0.055		0.088	0.44	0	0.000423503	0.000847094	0.00127077	0.00169454	0.0021184	0.00254235	0.00296638	0.00339051	0.00381473	0.00423903	0.00466343	0.00508791	0.00551249	0.00593716	0.00636192	0.00678677	0.00721171	0.00763675	0.00806188	0.00848709	0.00891241	0.00933781	0.00976331	0.0101889	0.0106146	0.0110404	0.0114662	0.0118922	0.0123182	0.0127444	0.0131706	0.013597	0.0140234	0.01445	0.0148766	0.0153033	0.0157301	0.016157	0.016584	0.0170112	0.0174384
0.5504	0.2325		0.7663	0.0525		0.0885	0.4425	0	0.000421245	0.000842577	0.001264	0.00168551	0.0021071	0.00252879	0.00295056	0.00337242	0.00379437	0.00421641	0.00463854	0.00506076	0.00548307	0.00590547	0.00632795	0.00675053	0.0071732	0.00759596	0.00801882	0.00844176	0.00886479	0.00928792	0.00971114	0.0101344	0.0105578	0.0109813	0.0114049	0.0118286	0.0122524	0.0126763	0.0131002	0.0135243	0.0139484	0.0143727	0.014797	0.0152214	0.015646	0.0160706	0.0164953	0.0169201	0.017345
0.5449	0.23		0.762	0.05		0.089	0.445	0	0.000419035	0.000838156	0.00125736	0.00167666	0.00209604	0.00251551	0.00293507	0.00335471	0.00377444	0.00419427	0.00461417	0.00503417	0.00545426	0.00587444	0.0062947	0.00671505	0.0071355	0.00755603	0.00797666	0.00839737	0.00881818	0.00923907	0.00966006	0.0100811	0.0105023	0.0109236	0.0113449	0.0117664	0.0121879	0.0126095	0.0130313	0.0134531	0.013875	0.014297	0.0147191	0.0151413	0.0155635	0.0159859	0.0164084	0.016831	0.0172536
0.5394	0.2275		0.7576	0.0475		0.0895	0.4475	0	0.000416867	0.000833819	0.00125086	0.00166798	0.00208519	0.00250249	0.00291987	0.00333734	0.0037549	0.00417254	0.00459028	0.0050081	0.005426	0.005844	0.00626209	0.00668026	0.00709852	0.00751687	0.00793531	0.00835384	0.00877246	0.00919117	0.00960997	0.0100289	0.0104478	0.0108669	0.0112861	0.0117053	0.0121247	0.0125441	0.0129636	0.0133832	0.013803	0.0142228	0.0146427	0.0150626	0.0154827	0.0159029	0.0163232	0.0167435	0.017164
0.534	0.225		0.7531	0.045		0.09	0.45	0	0.000414737	0.000829559	0.00124447	0.00165946	0.00207453	0.0024897	0.00290495	0.00332028	0.0037357	0.00415121	0.0045668	0.00498248	0.00539825	0.0058141	0.00623005	0.00664608	0.00706219	0.0074784	0.00789469	0.00831108	0.00872755	0.00914411	0.00956076	0.0099775	0.0103943	0.0108112	0.0112283	0.0116453	0.0120625	0.0124798	0.0128972	0.0133146	0.0137322	0.0141498	0.0145676	0.0149854	0.0154033	0.0158213	0.0162394	0.0166576	0.0170759
0.5286	0.2225		0.7485	0.0425		0.0905	0.4525	0	0.000412642	0.000825369	0.00123818	0.00165107	0.00206405	0.00247712	0.00289026	0.0033035	0.00371682	0.00413022	0.00454371	0.00495729	0.00537095	0.0057847	0.00619853	0.00661245	0.00702646	0.00744056	0.00785474	0.00826901	0.00868337	0.00909782	0.00951235	0.00992698	0.0103417	0.0107565	0.0111714	0.0115864	0.0120014	0.0124166	0.0128318	0.0132472	0.0136626	0.0140781	0.0144937	0.0149094	0.0153252	0.0157411	0.0161571	0.0165732	0.0169893
0.5233	0.22		0.7439	0.04		0.091	0.455	0	0.00041058	0.000821242	0.00123199	0.00164282	0.00205373	0.00246473	0.00287581	0.00328697	0.00369822	0.00410955	0.00452097	0.00493247	0.00534406	0.00575574	0.0061675	0.00657934	0.00699127	0.00740329	0.0078154	0.00822759	0.00863987	0.00905223	0.00946469	0.00987723	0.0102899	0.0107026	0.0111154	0.0115283	0.0119413	0.0123543	0.0127675	0.0131807	0.0135941	0.0140075	0.014421	0.0148346	0.0152483	0.0156621	0.016076	0.01649	0.016904
0.5179	0.2175		0.7391	0.0375		0.0915	0.4575	0	0.000408546	0.000817174	0.00122588	0.00163468	0.00204355	0.00245251	0.00286155	0.00327068	0.00367989	0.00408918	0.00449855	0.00490801	0.00531756	0.00572719	0.0061369	0.0065467	0.00695659	0.00736656	0.00777661	0.00818675	0.00859698	0.0090073	0.0094177	0.00982818	0.0102388	0.0106494	0.0110602	0.011471	0.0118819	0.0122929	0.012704	0.0131152	0.0135265	0.0139379	0.0143493	0.0147609	0.0151725	0.0155842	0.0159961	0.016408	0.01682
0.5126	0.215		0.7341	0.035		0.092	0.46	0	0.000406539	0.00081316	0.00121986	0.00162665	0.00203351	0.00244046	0.00284749	0.0032546	0.0036618	0.00406908	0.00447644	0.00488388	0.00529141	0.00569902	0.00610672	0.0065145	0.00692236	0.00733031	0.00773835	0.00814647	0.00855467	0.00896296	0.00937134	0.0097798	0.0101883	0.010597	0.0110057	0.0114145	0.0118234	0.0122324	0.0126415	0.0130506	0.0134599	0.0138692	0.0142786	0.0146881	0.0150977	0.0155074	0.0159172	0.0163271	0.016737
0.5074	0.2125		0.729	0.0325		0.0925	0.4625	0	0.000404558	0.000809197	0.00121392	0.00161872	0.0020236	0.00242856	0.0028336	0.00323873	0.00364394	0.00404923	0.0044546	0.00486005	0.00526559	0.00567121	0.00607691	0.0064827	0.00688857	0.00729453	0.00770056	0.00810669	0.00851289	0.00891919	0.00932556	0.00973202	0.0101386	0.0105452	0.0109519	0.0113587	0.0117656	0.0121726	0.0125797	0.0129868	0.013394	0.0138014	0.0142088	0.0146163	0.0150239	0.0154315	0.0158393	0.0162472	0.0166551
0.5022	0.21		0.7238	0.03		0.093	0.465	0	0.000402601	0.000805281	0.00120804	0.00161088	0.0020138	0.0024168	0.00281989	0.00322305	0.00362629	0.00402962	0.00443302	0.00483651	0.00524008	0.00564373	0.00604747	0.00645129	0.00685519	0.00725917	0.00766324	0.00806739	0.00847162	0.00887594	0.00928034	0.00968483	0.0100894	0.0104941	0.0108988	0.0113036	0.0117085	0.0121135	0.0125186	0.0129238	0.013329	0.0137344	0.0141398	0.0145453	0.0149509	0.0153566	0.0157624	0.0161682	0.0165742
0.497	0.2075		0.7183	0.0275		0.0935	0.4675	0	0.000400666	0.000801411	0.00120223	0.00160314	0.00200412	0.00240518	0.00280632	0.00320755	0.00360885	0.00401023	0.0044117	0.00481324	0.00521487	0.00561657	0.00601836	0.00642023	0.00682219	0.00722422	0.00762634	0.00802854	0.00843082	0.00883319	0.00923564	0.00963817	0.0100408	0.0104435	0.0108463	0.0112491	0.0116521	0.0120551	0.0124583	0.0128615	0.0132648	0.0136681	0.0140716	0.0144752	0.0148788	0.0152825	0.0156863	0.0160902	0.0164942
0.4918	0.205		0.7126	0.025		0.094	0.47	0	0.000398752	0.000797583	0.00119649	0.00159548	0.00199454	0.00239369	0.00279291	0.00319222	0.0035916	0.00399106	0.0043906	0.00479023	0.00518993	0.00558971	0.00598958	0.00638952	0.00678955	0.00718966	0.00758985	0.00799012	0.00839048	0.00879091	0.00919143	0.00959203	0.00999272	0.0103935	0.0107943	0.0111953	0.0115963	0.0119974	0.0123986	0.0127999	0.0132012	0.0136027	0.0140042	0.0144058	0.0148075	0.0152093	0.0156111	0.0160131	0.0164151
0.4867	0.2025		0.7065	0.0225		0.0945	0.4725	0	0.000396859	0.000793796	0.00119081	0.0015879	0.00198507	0.00238232	0.00277965	0.00317705	0.00357453	0.0039721	0.00436974	0.00476746	0.00516526	0.00556314	0.0059611	0.00635914	0.00675726	0.00715547	0.00755375	0.00795211	0.00835056	0.00874909	0.0091477	0.00954639	0.00994516	0.010344	0.010743	0.011142	0.0115411	0.0119403	0.0123395	0.0127389	0.0131383	0.0135379	0.0139375	0.0143372	0.0147369	0.0151368	0.0155368	0.0159368	0.0163369
0.4816	0.2		0.7001	0.02		0.095	0.475	0	0.000394986	0.000790048	0.00118519	0.0015804	0.0019757	0.00237107	0.00276651	0.00316204	0.00355764	0.00395333	0.00434909	0.00474493	0.00514084	0.00553684	0.00593292	0.00632908	0.00672531	0.00712163	0.00751802	0.0079145	0.00831106	0.0087077	0.00910442	0.00950122	0.0098981	0.0102951	0.0106921	0.0110892	0.0114864	0.0118837	0.0122811	0.0126786	0.0130761	0.0134737	0.0138715	0.0142692	0.0146671	0.0150651	0.0154631	0.0158613	0.0162595
0.4766	0.1975		0.6933	0.0175		0.0955	0.4775	0	0.000393131	0.000786337	0.00117962	0.00157298	0.00196641	0.00235993	0.00275352	0.00314718	0.00354092	0.00393475	0.00432864	0.00472262	0.00511668	0.00551081	0.00590502	0.00629931	0.00669368	0.00708813	0.00748266	0.00787727	0.00827195	0.00866672	0.00906157	0.0094565	0.00985151	0.0102466	0.0106418	0.011037	0.0114324	0.0118278	0.0122233	0.0126189	0.0130145	0.0134103	0.0138061	0.014202	0.014598	0.0149941	0.0153903	0.0157865	0.0161828
0.4716	0.195		0.6859	0.015		0.096	0.48	0	0.000391294	0.000782663	0.00117411	0.00156563	0.00195722	0.0023489	0.00274064	0.00313247	0.00352437	0.00391635	0.0043084	0.00470053	0.00509274	0.00548503	0.0058774	0.00626984	0.00666236	0.00705496	0.00744764	0.0078404	0.00823324	0.00862615	0.00901915	0.00941223	0.00980538	0.0101986	0.0105919	0.0109853	0.0113788	0.0117724	0.012166	0.0125597	0.0129535	0.0133474	0.0137414	0.0141355	0.0145296	0.0149238	0.0153181	0.0157125	0.016107
0.4667	0.1925		0.6778	0.0125		0.0965	0.4825	0	0.000389475	0.000779025	0.00116865	0.00155835	0.00194812	0.00233797	0.0027279	0.0031179	0.00350797	0.00389813	0.00428835	0.00467866	0.00506904	0.0054595	0.00585004	0.00624065	0.00663134	0.00702211	0.00741296	0.00780389	0.00819489	0.00858597	0.00897714	0.00936838	0.0097597	0.0101511	0.0105426	0.0109341	0.0113258	0.0117175	0.0121093	0.0125012	0.0128931	0.0132852	0.0136773	0.0140695	0.0144618	0.0148542	0.0152467	0.0156392	0.0160318
0.4618	0.19		0.6688	0.01		0.097	0.485	0	0.000387673	0.00077542	0.00116324	0.00155114	0.00193911	0.00232715	0.00271527	0.00310346	0.00349173	0.00388008	0.0042685	0.00465699	0.00504556	0.00543421	0.00582294	0.00621174	0.00660062	0.00698958	0.00737861	0.00776772	0.00815691	0.00854618	0.00893552	0.00932494	0.00971445	0.010104	0.0104937	0.0108834	0.0112733	0.0116631	0.0120531	0.0124432	0.0128333	0.0132236	0.0136139	0.0140042	0.0143947	0.0147852	0.0151759	0.0155666	0.0159574
0.457	0.1875		0.6587	0.0075		0.0975	0.4875	0	0.000385888	0.000771849	0.00115788	0.00154399	0.00193017	0.00231643	0.00270276	0.00308916	0.00347564	0.00386219	0.00424882	0.00463553	0.00502231	0.00540916	0.00579609	0.0061831	0.00657018	0.00695734	0.00734458	0.00773189	0.00811928	0.00850675	0.00889429	0.00928192	0.00966962	0.0100574	0.0104453	0.0108332	0.0112212	0.0116093	0.0119975	0.0123857	0.0127741	0.0131625	0.013551	0.0139396	0.0143282	0.0147169	0.0151058	0.0154947	0.0158836
0.4522	0.185		0.6472	0.005		0.098	0.49	0	0.000384119	0.000768311	0.00115258	0.00153691	0.00192132	0.00230581	0.00269036	0.00307499	0.0034597	0.00384448	0.00422933	0.00461426	0.00499926	0.00538434	0.00576949	0.00615472	0.00654002	0.0069254	0.00731086	0.00769639	0.008082	0.00846768	0.00885345	0.00923929	0.0096252	0.0100112	0.0103973	0.0107834	0.0111697	0.011556	0.0119423	0.0123288	0.0127154	0.013102	0.0134887	0.0138755	0.0142623	0.0146493	0.0150363	0.0154234	0.0158106
0.4475	0.1825		0.6339	0.0025		0.0985	0.4925	0	0.000382367	0.000764805	0.00114732	0.0015299	0.00191255	0.00229528	0.00267808	0.00306095	0.0034439	0.00382692	0.00421001	0.00459318	0.00497642	0.00535974	0.00574313	0.0061266	0.00651014	0.00689375	0.00727745	0.00766121	0.00804506	0.00842898	0.00881297	0.00919704	0.00958119	0.00996542	0.0103497	0.0107341	0.0111186	0.0115031	0.0118877	0.0122724	0.0126572	0.013042	0.013427	0.013812	0.0141971	0.0145822	0.0149675	0.0153528	0.0157382
0.4429	0.18		0.6183	0		0.099	0.495	0	0.000380629	0.00076133	0.0011421	0.00152295	0.00190386	0.00228485	0.00266591	0.00304704	0.00342824	0.00380952	0.00419087	0.0045723	0.00495379	0.00533536	0.00571701	0.00609873	0.00648052	0.00686239	0.00724433	0.00762635	0.00800845	0.00839062	0.00877286	0.00915518	0.00953758	0.00992005	0.0103026	0.0106852	0.0110679	0.0114507	0.0118336	0.0122165	0.0125995	0.0129826	0.0133658	0.013749	0.0141324	0.0145158	0.0148993	0.0152828	0.0156665
0.4384	0.1775					0.0995	0.4975	0	0.000378908	0.000757886	0.00113693	0.00151605	0.00189525	0.00227451	0.00265384	0.00303325	0.00341273	0.00379228	0.0041719	0.00455159	0.00493136	0.0053112	0.00569112	0.00607111	0.00645117	0.00683131	0.00721152	0.0075918	0.00797216	0.0083526	0.00873311	0.00911369	0.00949435	0.00987509	0.0102559	0.0106368	0.0110178	0.0113988	0.0117799	0.0121611	0.0125424	0.0129237	0.0133052	0.0136867	0.0140683	0.0144499	0.0148317	0.0152135	0.0155954
0.4339	0.175					0.1	0.5	0	0.000377201	0.000754472	0.00113181	0.00150922	0.00188671	0.00226426	0.00264188	0.00301958	0.00339735	0.00377518	0.00415309	0.00453108	0.00490913	0.00528726	0.00566546	0.00604373	0.00642208	0.0068005	0.00717899	0.00755756	0.0079362	0.00831491	0.0086937	0.00907257	0.00945151	0.00983052	0.0102096	0.0105888	0.010968	0.0113473	0.0117267	0.0121062	0.0124858	0.0128654	0.0132451	0.0136249	0.0140047	0.0143847	0.0147647	0.0151448	0.0155249
0.4295	0.1725					0.1005	0.5025	0	0.000375509	0.000751088	0.00112674	0.00150245	0.00187824	0.0022541	0.00263003	0.00300603	0.0033821	0.00375824	0.00413445	0.00451074	0.00488709	0.00526352	0.00564002	0.00601659	0.00639324	0.00676996	0.00714675	0.00752361	0.00790055	0.00827756	0.00865465	0.00903181	0.00940904	0.00978635	0.0101637	0.0105412	0.0109187	0.0112963	0.011674	0.0120518	0.0124296	0.0128075	0.0131855	0.0135636	0.0139417	0.01432	0.0146983	0.0150766	0.0154551
0.4253	0.17					0.101	0.505	0	0.000373832	0.000747734	0.0011217	0.00149574	0.00186985	0.00224403	0.00261828	0.0029926	0.00336699	0.00374144	0.00411597	0.00449058	0.00486525	0.00523999	0.00561481	0.00598969	0.00636465	0.00673968	0.00711479	0.00748996	0.00786521	0.00824054	0.00861593	0.0089914	0.00936695	0.00974256	0.0101183	0.010494	0.0108699	0.0112458	0.0116218	0.0119978	0.012374	0.0127502	0.0131265	0.0135029	0.0138793	0.0142558	0.0146324	0.0150091	0.0153859
0.4211	0.1675					0.1015	0.5075	0	0.00037217	0.000744408	0.00111671	0.00148909	0.00186153	0.00223405	0.00260663	0.00297928	0.003352	0.00372479	0.00409766	0.00447059	0.00484359	0.00521666	0.00558981	0.00596302	0.00633631	0.00670967	0.0070831	0.00745661	0.00783018	0.00820383	0.00857755	0.00895135	0.00932521	0.00969916	0.0100732	0.0104473	0.0108214	0.0111957	0.01157	0.0119444	0.0123188	0.0126934	0.013068	0.0134427	0.0138174	0.0141923	0.0145672	0.0149422	0.0153173
0.4171	0.165					0.102	0.51	0	0.000370522	0.000741111	0.00111177	0.00148249	0.00185329	0.00222415	0.00259508	0.00296608	0.00333715	0.00370829	0.00407949	0.00445077	0.00482212	0.00519354	0.00556503	0.00593659	0.00630822	0.00667992	0.00705169	0.00742354	0.00779545	0.00816744	0.0085395	0.00891164	0.00928384	0.00965612	0.0100285	0.0104009	0.0107734	0.011146	0.0115186	0.0118913	0.0122641	0.012637	0.01301	0.013383	0.0137561	0.0141293	0.0145025	0.0148758	0.0152492
0.4132	0.1625					0.1025	0.5125	0	0.000368887	0.000737842	0.00110686	0.00147595	0.00184511	0.00221433	0.00258363	0.00295299	0.00332242	0.00369192	0.00406149	0.00443113	0.00480083	0.00517061	0.00554046	0.00591037	0.00628036	0.00665042	0.00702055	0.00739075	0.00776102	0.00813137	0.00850178	0.00887227	0.00924283	0.00961346	0.00998417	0.0103549	0.0107258	0.0110967	0.0114677	0.0118388	0.0122099	0.0125812	0.0129525	0.0133238	0.0136953	0.0140668	0.0144384	0.0148101	0.0151818
0.4094	0.16					0.103	0.515	0	0.000367267	0.000734601	0.001102	0.00146947	0.001837	0.00220461	0.00257227	0.00294001	0.00330782	0.00367569	0.00404364	0.00441165	0.00477973	0.00514788	0.0055161	0.00588439	0.00625275	0.00662118	0.00698968	0.00735825	0.00772689	0.0080956	0.00846438	0.00883324	0.00920217	0.00957116	0.00994024	0.0103094	0.0106786	0.0110479	0.0114172	0.0117867	0.0121562	0.0125258	0.0128954	0.0132652	0.013635	0.0140049	0.0143748	0.0147448	0.0151149
0.4058	0.1575					0.1035	0.5175	0	0.00036566	0.000731387	0.00109718	0.00146304	0.00182896	0.00219496	0.00256102	0.00292715	0.00329334	0.0036596	0.00402594	0.00439233	0.0047588	0.00512534	0.00549195	0.00585862	0.00622537	0.00659218	0.00695906	0.00732602	0.00769304	0.00806014	0.0084273	0.00879454	0.00916185	0.00952923	0.00989668	0.0102642	0.0106318	0.0109995	0.0113672	0.011735	0.0121029	0.0124709	0.0128389	0.013207	0.0135752	0.0139434	0.0143118	0.0146802	0.0150487
0.4023	0.155					0.104	0.52	0	0.000364067	0.0007282	0.0010924	0.00145666	0.00182099	0.00218539	0.00254986	0.00291439	0.00327899	0.00364365	0.00400838	0.00437319	0.00473805	0.00510299	0.005468	0.00583307	0.00619822	0.00656343	0.00692871	0.00729406	0.00765948	0.00802498	0.00839054	0.00875617	0.00912187	0.00948765	0.00985349	0.0102194	0.0105854	0.0109515	0.0113176	0.0116838	0.0120501	0.0124164	0.0127829	0.0131493	0.0135159	0.0138826	0.0142493	0.0146161	0.0149829
0.3989	0.1525					0.1045	0.5225	0	0.000362488	0.00072504	0.00108766	0.00145034	0.00181309	0.00217591	0.00253879	0.00290174	0.00326475	0.00362783	0.00399098	0.0043542	0.00471748	0.00508083	0.00544425	0.00580774	0.0061713	0.00653492	0.00689861	0.00726238	0.00762621	0.00799011	0.00835408	0.00871813	0.00908224	0.00944642	0.00981067	0.010175	0.0105394	0.0109039	0.0112684	0.011633	0.0119977	0.0123624	0.0127273	0.0130922	0.0134572	0.0138222	0.0141873	0.0145525	0.0149178
0.3956	0.15					0.105	0.525	0	0.000360921	0.000721907	0.00108296	0.00144407	0.00180525	0.0021665	0.00252781	0.00288919	0.00325064	0.00361215	0.00397373	0.00433537	0.00469708	0.00505886	0.00542071	0.00578262	0.0061446	0.00650665	0.00686877	0.00723096	0.00759322	0.00795554	0.00831794	0.0086804	0.00904294	0.00940554	0.00976822	0.010131	0.0104938	0.0108567	0.0112196	0.0115827	0.0119458	0.0123089	0.0126722	0.0130355	0.0133989	0.0137623	0.0141259	0.0144895	0.0148532
0.3924	0.1475					0.1055	0.5275	0	0.000359368	0.0007188	0.0010783	0.00143786	0.00179748	0.00215717	0.00251693	0.00287675	0.00323664	0.00359659	0.00395661	0.0043167	0.00467685	0.00503707	0.00539736	0.00575771	0.00611813	0.00647862	0.00683918	0.00719981	0.0075605	0.00792126	0.0082821	0.008643	0.00900397	0.00936501	0.00972612	0.0100873	0.0104485	0.0108099	0.0111713	0.0115327	0.0118943	0.0122559	0.0126175	0.0129793	0.0133411	0.013703	0.014065	0.014427	0.0147891
0.3893	0.145					0.106	0.53	0	0.000357828	0.000715719	0.00107367	0.00143169	0.00178978	0.00214793	0.00250614	0.00286442	0.00322276	0.00358117	0.00393965	0.00429819	0.00465679	0.00501547	0.00537421	0.00573301	0.00609189	0.00645083	0.00680984	0.00716891	0.00752806	0.00788727	0.00824655	0.0086059	0.00896532	0.00932481	0.00968437	0.010044	0.0104037	0.0107635	0.0111233	0.0114832	0.0118432	0.0122032	0.0125634	0.0129235	0.0132838	0.0136442	0.0140046	0.014365	0.0147256
0.3863	0.1425					0.1065	0.5325	0	0.0003563	0.000712663	0.00106909	0.00142558	0.00178214	0.00213875	0.00249544	0.00285218	0.003209	0.00356588	0.00392282	0.00427983	0.0046369	0.00499404	0.00535125	0.00570852	0.00606586	0.00642327	0.00678074	0.00713828	0.00749589	0.00785356	0.00821131	0.00856912	0.008927	0.00928495	0.00964297	0.0100011	0.0103592	0.0107174	0.0110757	0.0114341	0.0117925	0.0121511	0.0125096	0.0128683	0.013227	0.0135858	0.0139447	0.0143036	0.0146626
0.3832	0.14					0.107	0.535	0	0.000354785	0.000709633	0.00106454	0.00141952	0.00177456	0.00212966	0.00248482	0.00284005	0.00319535	0.00355071	0.00390613	0.00426162	0.00461717	0.00497279	0.00532848	0.00568423	0.00604005	0.00639593	0.00675188	0.0071079	0.00746399	0.00782014	0.00817636	0.00853265	0.008889	0.00924543	0.00960192	0.00995848	0.0103151	0.0106718	0.0110286	0.0113854	0.0117423	0.0120993	0.0124564	0.0128135	0.0131707	0.0135279	0.0138853	0.0142427	0.0146001
0.38	0.1375					0.1075	0.5375	0	0.000353283	0.000706628	0.00106004	0.00141351	0.00176704	0.00212064	0.0024743	0.00282802	0.00318181	0.00353566	0.00388958	0.00424356	0.00459761	0.00495172	0.0053059	0.00566014	0.00601445	0.00636883	0.00672327	0.00707778	0.00743235	0.00778699	0.0081417	0.00849648	0.00885132	0.00920623	0.00956121	0.00991626	0.0102714	0.0106266	0.0109818	0.0113371	0.0116925	0.012048	0.0124035	0.0127591	0.0131148	0.0134706	0.0138264	0.0141823	0.0145382
0.3767	0.135					0.108	0.54	0	0.000351793	0.000703648	0.00105557	0.00140754	0.00175959	0.00211169	0.00246386	0.00281609	0.00316839	0.00352075	0.00387317	0.00422566	0.00457821	0.00493083	0.00528351	0.00563626	0.00598907	0.00634195	0.00669489	0.0070479	0.00740098	0.00775412	0.00810733	0.00846061	0.00881395	0.00916736	0.00952084	0.00987439	0.010228	0.0105817	0.0109354	0.0112893	0.0116432	0.0119971	0.0123511	0.0127052	0.0130594	0.0134137	0.013768	0.0141223	0.0144768
0.3732	0.1325					0.1085	0.5425	0	0.000350315	0.000700692	0.00105113	0.00140163	0.0017522	0.00210282	0.00245351	0.00280426	0.00315507	0.00350595	0.00385689	0.0042079	0.00455897	0.0049101	0.0052613	0.00561257	0.00596389	0.00631529	0.00666675	0.00701827	0.00736986	0.00772152	0.00807324	0.00842503	0.00877689	0.00912881	0.0094808	0.00983286	0.010185	0.0105372	0.0108894	0.0112418	0.0115942	0.0119467	0.0122992	0.0126518	0.0130045	0.0133572	0.01371	0.0140629	0.0144159
0.3694	0.13					0.109	0.545	0	0.00034885	0.000697761	0.00104673	0.00139577	0.00174486	0.00209402	0.00244324	0.00279253	0.00314187	0.00349128	0.00384075	0.00419029	0.00453989	0.00488955	0.00523928	0.00558907	0.00593893	0.00628885	0.00663884	0.00698889	0.007339	0.00768919	0.00803944	0.00838975	0.00874014	0.00909058	0.0094411	0.00979168	0.0101423	0.0104931	0.0108438	0.0111947	0.0115456	0.0118966	0.0122477	0.0125988	0.01295	0.0133013	0.0136526	0.014004	0.0143555
0.3654	0.1275					0.1095	0.5475	0	0.000347396	0.000694854	0.00104237	0.00138995	0.00173759	0.0020853	0.00243306	0.00278089	0.00312878	0.00347673	0.00382474	0.00417282	0.00452096	0.00486917	0.00521744	0.00556577	0.00591417	0.00626263	0.00661115	0.00695975	0.0073084	0.00765712	0.00800591	0.00835477	0.00870369	0.00905267	0.00940172	0.00975084	0.0101	0.0104493	0.0107986	0.011148	0.0114975	0.011847	0.0121966	0.0125462	0.012896	0.0132458	0.0135956	0.0139456	0.0142956
0.3611	0.125					0.11	0.55	0	0.000345955	0.00069197	0.00103805	0.00138418	0.00173038	0.00207664	0.00242296	0.00276934	0.00311579	0.0034623	0.00380887	0.0041555	0.00450219	0.00484895	0.00519577	0.00554266	0.00588961	0.00623662	0.0065837	0.00693084	0.00727805	0.00762532	0.00797266	0.00832007	0.00866754	0.00901507	0.00936267	0.00971034	0.0100581	0.0104059	0.0107537	0.0111017	0.0114497	0.0117978	0.0121459	0.0124941	0.0128424	0.0131907	0.0135391	0.0138876	0.0142362
0.3564	0.1225					0.1105	0.5525	0	0.000344525	0.00068911	0.00103376	0.00137846	0.00172323	0.00206806	0.00241294	0.0027579	0.00310291	0.00344798	0.00379312	0.00413832	0.00448358	0.0048289	0.00517429	0.00551974	0.00586525	0.00621083	0.00655647	0.00690218	0.00724795	0.00759379	0.00793969	0.00828565	0.00863168	0.00897778	0.00932394	0.00967017	0.0100165	0.0103628	0.0107093	0.0110558	0.0114023	0.0117489	0.0120956	0.0124424	0.0127892	0.0131361	0.0134831	0.0138302	0.0141773
0.3515	0.12					0.111	0.555	0	0.000343107	0.000686273	0.0010295	0.00137279	0.00171613	0.00205954	0.00240301	0.00274654	0.00309013	0.00343378	0.0037775	0.00412127	0.00446511	0.00480902	0.00515298	0.00549701	0.0058411	0.00618525	0.00652947	0.00687375	0.0072181	0.0075625	0.00790698	0.00825152	0.00859612	0.00894079	0.00928553	0.00963033	0.0099752	0.0103201	0.0106651	0.0110102	0.0113553	0.0117005	0.0120458	0.0123911	0.0127365	0.013082	0.0134276	0.0137732	0.0141188
0.3462	0.1175					0.1115	0.5575	0	0.0003417	0.00068346	0.00102528	0.00136716	0.0017091	0.0020511	0.00239316	0.00273528	0.00307746	0.0034197	0.00376201	0.00410437	0.0044468	0.00478929	0.00513184	0.00547446	0.00581714	0.00615988	0.00650268	0.00684555	0.00718848	0.00753148	0.00787454	0.00821767	0.00856086	0.00890411	0.00924743	0.00959082	0.00993427	0.0102778	0.0106214	0.010965	0.0113087	0.0116525	0.0119964	0.0123403	0.0126843	0.0130283	0.0133724	0.0137166	0.0140609
0.3406	0.115					0.112	0.56	0	0.000340305	0.000680669	0.00102109	0.00136157	0.00170212	0.00204272	0.00238338	0.00272411	0.00306489	0.00340573	0.00374664	0.00408761	0.00442864	0.00476973	0.00511088	0.0054521	0.00579337	0.00613471	0.00647612	0.00681758	0.00715911	0.00750071	0.00784237	0.00818409	0.00852588	0.00886773	0.00920964	0.00955162	0.00989367	0.0102358	0.010578	0.0109202	0.0112625	0.0116049	0.0119473	0.0122898	0.0126324	0.0129751	0.0133178	0.0136606	0.0140034
0.3348	0.1125					0.1125	0.5625	0	0.000338921	0.000677901	0.00101694	0.00135604	0.00169519	0.00203441	0.00237369	0.00271303	0.00305242	0.00339188	0.0037314	0.00407098	0.00441062	0.00475032	0.00509009	0.00542991	0.0057698	0.00610975	0.00644977	0.00678984	0.00712998	0.00747019	0.00781046	0.00815079	0.00849118	0.00883164	0.00917216	0.00951275	0.00985341	0.0101941	0.0105349	0.0108758	0.0112167	0.0115577	0.0118987	0.0122398	0.012581	0.0129223	0.0132636	0.013605	0.0139464
0.3288	0.11					0.113	0.565	0	0.000337548	0.000675155	0.00101282	0.00135054	0.00168833	0.00202617	0.00236407	0.00270203	0.00304006	0.00337814	0.00371628	0.00405449	0.00439275	0.00473108	0.00506946	0.00540791	0.00574642	0.006085	0.00642363	0.00676233	0.00710109	0.00743992	0.0077788	0.00811775	0.00845677	0.00879585	0.00913499	0.0094742	0.00981347	0.0101528	0.0104922	0.0108317	0.0111712	0.0115108	0.0118505	0.0121902	0.01253	0.0128699	0.0132098	0.0135498	0.0138899
0.3226	0.1075					0.1135	0.5675	0	0.000336187	0.000672431	0.00100873	0.0013451	0.00168152	0.002018	0.00235453	0.00269113	0.00302779	0.00336451	0.00370129	0.00403813	0.00437502	0.00471199	0.00504901	0.00538609	0.00572323	0.00606044	0.00639771	0.00673504	0.00707243	0.00740989	0.00774741	0.00808499	0.00842264	0.00876035	0.00909812	0.00943596	0.00977386	0.0101118	0.0104499	0.010788	0.0111261	0.0114643	0.0118026	0.012141	0.0124794	0.0128179	0.0131565	0.0134951	0.0138338
0.3162	0.105					0.114	0.57	0	0.000334836	0.000669729	0.00100468	0.00133969	0.00167476	0.00200989	0.00234507	0.00268032	0.00301562	0.00335099	0.00368641	0.0040219	0.00435744	0.00469305	0.00502871	0.00536444	0.00570023	0.00603608	0.00637199	0.00670797	0.00704401	0.0073801	0.00771627	0.00805249	0.00838878	0.00872513	0.00906155	0.00939802	0.00973457	0.0100712	0.0104078	0.0107446	0.0110814	0.0114183	0.0117552	0.0120922	0.0124293	0.0127664	0.0131036	0.0134408	0.0137782
0.3097	0.1025					0.1145	0.5725	0	0.000333496	0.000667049	0.00100066	0.00133433	0.00166806	0.00200184	0.00233569	0.00266959	0.00300355	0.00333758	0.00367166	0.0040058	0.00434	0.00467426	0.00500859	0.00534297	0.00567741	0.00601192	0.00634649	0.00668112	0.00701581	0.00735056	0.00768538	0.00802025	0.0083552	0.0086902	0.00902527	0.0093604	0.0096956	0.0100309	0.0103662	0.0107016	0.011037	0.0113725	0.0117081	0.0120438	0.0123795	0.0127153	0.0130511	0.013387	0.013723
0.303	0.1					0.115	0.575	0	0.000332167	0.000664391	0.000996672	0.00132901	0.00166141	0.00199386	0.00232638	0.00265895	0.00299158	0.00332427	0.00365702	0.00398983	0.0043227	0.00465563	0.00498862	0.00532167	0.00565478	0.00598795	0.00632119	0.00665448	0.00698784	0.00732126	0.00765474	0.00798828	0.00832188	0.00865555	0.00898928	0.00932308	0.00965694	0.00999086	0.0103248	0.0106589	0.010993	0.0113272	0.0116614	0.0119957	0.0123301	0.0126646	0.0129991	0.0133337	0.0136683
0.2963	0.0975					0.1155	0.5775	0	0.000330848	0.000661754	0.000992716	0.00132374	0.00165481	0.00198595	0.00231714	0.0026484	0.00297971	0.00331108	0.0036425	0.00397399	0.00430554	0.00463715	0.00496881	0.00530054	0.00563233	0.00596418	0.00629609	0.00662806	0.00696009	0.00729219	0.00762434	0.00795656	0.00828884	0.00862118	0.00895359	0.00928606	0.00961859	0.00995119	0.0102838	0.0106166	0.0109494	0.0112822	0.0116151	0.0119481	0.0122812	0.0126143	0.0129475	0.0132807	0.013614
0.2896	0.095					0.116	0.58	0	0.00032954	0.000659137	0.000988791	0.0013185	0.00164827	0.0019781	0.00230798	0.00263792	0.00296792	0.00329798	0.0036281	0.00395828	0.00428852	0.00461881	0.00494917	0.00527958	0.00561006	0.0059406	0.00627119	0.00660185	0.00693257	0.00726335	0.00759419	0.0079251	0.00825606	0.00858709	0.00891818	0.00924934	0.00958055	0.00991184	0.0102432	0.0105746	0.0109061	0.0112376	0.0115692	0.0119009	0.0122326	0.0125644	0.0128963	0.0132282	0.0135602
0.2827	0.0925					0.1165	0.5825	0	0.000328243	0.000656542	0.000984898	0.00131331	0.00164178	0.00197031	0.00229889	0.00262754	0.00295624	0.003285	0.00361381	0.00394269	0.00427163	0.00460062	0.00492968	0.00525879	0.00558797	0.0059172	0.0062465	0.00657585	0.00690527	0.00723475	0.00756428	0.00789389	0.00822355	0.00855327	0.00888306	0.00921291	0.00954282	0.0098728	0.0102028	0.0105329	0.0108631	0.0111933	0.0115236	0.011854	0.0121844	0.0125149	0.0128455	0.0131761	0.0135068
0.2759	0.09					0.117	0.585	0	0.000326956	0.000653967	0.000981036	0.00130816	0.00163534	0.00196258	0.00228988	0.00261723	0.00294464	0.00327211	0.00359964	0.00392723	0.00425487	0.00458258	0.00491034	0.00523817	0.00556605	0.00589399	0.006222	0.00655006	0.00687818	0.00720637	0.00753462	0.00786292	0.00819129	0.00851973	0.00884822	0.00917677	0.00950539	0.00983407	0.0101628	0.0104916	0.0108205	0.0111494	0.0114784	0.0118075	0.0121366	0.0124658	0.0127951	0.0131244	0.0134538
0.2691	0.0875					0.1175	0.5875	0	0.000325679	0.000651413	0.000977204	0.00130305	0.00162896	0.00195492	0.00228093	0.00260701	0.00293314	0.00325933	0.00358558	0.00391189	0.00423825	0.00456468	0.00489116	0.00521771	0.00554431	0.00587097	0.00619769	0.00652447	0.00685132	0.00717822	0.00750518	0.00783221	0.0081593	0.00848645	0.00881366	0.00914093	0.00946826	0.00979566	0.0101231	0.0104506	0.0107782	0.0111059	0.0114336	0.0117614	0.0120892	0.0124171	0.0127451	0.0130731	0.0134012
0.2622	0.085					0.118	0.59	0	0.000324412	0.000648879	0.000973403	0.00129798	0.00162262	0.00194731	0.00227206	0.00259687	0.00292173	0.00324665	0.00357163	0.00389667	0.00422177	0.00454692	0.00487213	0.00519741	0.00552274	0.00584813	0.00617358	0.00649909	0.00682466	0.00715029	0.00747599	0.00780174	0.00812756	0.00845343	0.00877937	0.00910537	0.00943143	0.00975755	0.0100837	0.01041	0.0107363	0.0110627	0.0113891	0.0117156	0.0120422	0.0123688	0.0126955	0.0130223	0.0133491
0.2553	0.0825					0.1185	0.5925	0	0.000323155	0.000646365	0.000969631	0.00129295	0.00161633	0.00193977	0.00226326	0.00258681	0.00291041	0.00323407	0.0035578	0.00388157	0.00420541	0.0045293	0.00485326	0.00517727	0.00550134	0.00582547	0.00614966	0.00647391	0.00679822	0.00712259	0.00744702	0.00777151	0.00809607	0.00842068	0.00874535	0.00907009	0.00939489	0.00971975	0.0100447	0.0103697	0.0106947	0.0110198	0.011345	0.0116702	0.0119955	0.0123209	0.0126463	0.0129718	0.0132974
0.2485	0.08					0.119	0.595	0	0.000321908	0.000643871	0.00096589	0.00128796	0.00161009	0.00193228	0.00225452	0.00257682	0.00289918	0.0032216	0.00354407	0.0038666	0.00418918	0.00451183	0.00483453	0.00515729	0.00548011	0.00580299	0.00612593	0.00644893	0.00677199	0.00709511	0.00741829	0.00774153	0.00806483	0.00838819	0.00871161	0.00903509	0.00935864	0.00968225	0.0100059	0.0103296	0.0106534	0.0109773	0.0113012	0.0116252	0.0119493	0.0122734	0.0125975	0.0129218	0.0132461
0.2417	0.0775					0.1195	0.5975	0	0.000320671	0.000641397	0.000962178	0.00128301	0.00160391	0.00192486	0.00224586	0.00256692	0.00288804	0.00320921	0.00353045	0.00385174	0.00417308	0.00449449	0.00481595	0.00513747	0.00545905	0.00578069	0.00610239	0.00642415	0.00674597	0.00706784	0.00738978	0.00771178	0.00803384	0.00835595	0.00867813	0.00900038	0.00932268	0.00964504	0.00996747	0.01029	0.0106125	0.0109351	0.0112578	0.0115805	0.0119033	0.0122262	0.0125491	0.0128721	0.0131952
0.2348	0.075					0.12	0.6	0	0.000319443	0.000638942	0.000958495	0.0012781	0.00159777	0.00191749	0.00223726	0.0025571	0.00287699	0.00319693	0.00351693	0.00383699	0.00415711	0.00447729	0.00479752	0.00511781	0.00543816	0.00575857	0.00607904	0.00639956	0.00672015	0.00704079	0.0073615	0.00768226	0.00800309	0.00832398	0.00864492	0.00896593	0.009287	0.00960813	0.00992932	0.0102506	0.0105719	0.0108933	0.0112147	0.0115362	0.0118578	0.0121794	0.0125011	0.0128229	0.0131447
0.2281	0.0725					0.1205	0.6025	0	0.000318226	0.000636506	0.000954841	0.00127323	0.00159168	0.00191018	0.00222874	0.00254735	0.00286602	0.00318474	0.00350353	0.00382237	0.00414126	0.00446022	0.00477923	0.0050983	0.00541743	0.00573662	0.00605586	0.00637517	0.00669453	0.00701396	0.00733344	0.00765298	0.00797259	0.00829225	0.00861197	0.00893176	0.00925161	0.00957151	0.00989148	0.0102115	0.0105316	0.0108518	0.011172	0.0114923	0.0118126	0.012133	0.0124535	0.012774	0.0130946
0.2213	0.07					0.121	0.605	0	0.000317017	0.000634089	0.000951216	0.0012684	0.00158563	0.00190293	0.00222027	0.00253768	0.00285514	0.00317265	0.00349023	0.00380786	0.00412554	0.00444329	0.00476109	0.00507895	0.00539687	0.00571484	0.00603288	0.00635097	0.00666912	0.00698733	0.0073056	0.00762393	0.00794232	0.00826077	0.00857929	0.00889786	0.00921649	0.00953518	0.00985394	0.0101728	0.0104916	0.0108106	0.0111296	0.0114486	0.0117678	0.012087	0.0124062	0.0127255	0.0130449
0.2146	0.0675					0.1215	0.6075	0	0.000315819	0.000631692	0.000947619	0.0012636	0.00157964	0.00189573	0.00221188	0.00252808	0.00284434	0.00316066	0.00347703	0.00379346	0.00410994	0.00442649	0.00474309	0.00505975	0.00537646	0.00569323	0.00601007	0.00632696	0.00664391	0.00696092	0.00727798	0.00759511	0.0079123	0.00822955	0.00854685	0.00886422	0.00918165	0.00949914	0.00981669	0.0101343	0.010452	0.0107697	0.0110875	0.0114054	0.0117233	0.0120413	0.0123593	0.0126774	0.0129956
0.2079	0.065					0.122	0.61	0	0.000314629	0.000629312	0.00094405	0.00125884	0.00157369	0.00188859	0.00220355	0.00251856	0.00283363	0.00314876	0.00346394	0.00377917	0.00409447	0.00440982	0.00472523	0.00504069	0.00535622	0.0056718	0.00598744	0.00630313	0.00661889	0.00693471	0.00725058	0.00756652	0.00788251	0.00819856	0.00851468	0.00883085	0.00914708	0.00946338	0.00977974	0.0100962	0.0104126	0.0107292	0.0110458	0.0113624	0.0116792	0.011996	0.0123128	0.0126297	0.0129467
0.2013	0.0625					0.1225	0.6125	0	0.000313449	0.000626952	0.000940509	0.00125412	0.00156779	0.00188151	0.00219528	0.00250912	0.002823	0.00313695	0.00345094	0.003765	0.00407911	0.00439328	0.00470751	0.00502179	0.00533613	0.00565053	0.00596498	0.0062795	0.00659407	0.0069087	0.00722339	0.00753814	0.00785295	0.00816782	0.00848275	0.00879774	0.00911279	0.0094279	0.00974307	0.0100583	0.0103736	0.010689	0.0110044	0.0113199	0.0116354	0.011951	0.0122667	0.0125824	0.0128982
0.1947	0.06					0.123	0.615	0	0.000312278	0.00062461	0.000936996	0.00124944	0.00156193	0.00187448	0.00218708	0.00249974	0.00281246	0.00312523	0.00343805	0.00375094	0.00406388	0.00437687	0.00468992	0.00500303	0.0053162	0.00562942	0.00594271	0.00625605	0.00656945	0.0068829	0.00719642	0.00750999	0.00782363	0.00813732	0.00845108	0.00876489	0.00907876	0.0093927	0.00970669	0.0100208	0.0103349	0.010649	0.0109633	0.0112776	0.011592	0.0119064	0.0122209	0.0125354	0.01285
0.1881	0.0575					0.1235	0.6175	0	0.000311116	0.000622286	0.000933509	0.00124479	0.00155612	0.00186751	0.00217895	0.00249044	0.00280199	0.0031136	0.00342526	0.00373698	0.00404876	0.00436059	0.00467248	0.00498442	0.00529643	0.00560849	0.0059206	0.00623278	0.00654501	0.0068573	0.00716965	0.00748206	0.00779453	0.00810706	0.00841965	0.0087323	0.009045	0.00935777	0.0096706	0.00998349	0.0102964	0.0106095	0.0109225	0.0112357	0.0115489	0.0118621	0.0121754	0.0124888	0.0128023
0.1816	0.055					0.124	0.62	0	0.000309963	0.00061998	0.00093005	0.00124017	0.00155035	0.00186059	0.00217087	0.00248122	0.00279161	0.00310207	0.00341257	0.00372314	0.00403376	0.00434443	0.00465517	0.00496596	0.00527681	0.00558771	0.00589867	0.00620969	0.00652077	0.0068319	0.0071431	0.00745435	0.00776566	0.00807704	0.00838847	0.00869996	0.00901151	0.00932312	0.00963479	0.00994652	0.0102583	0.0105702	0.0108821	0.0111941	0.0115061	0.0118182	0.0121304	0.0124426	0.0127549
0.1751	0.0525					0.1245	0.6225	0	0.000308819	0.000617692	0.000926618	0.0012356	0.00154463	0.00185372	0.00216286	0.00247206	0.00278131	0.00309062	0.00339998	0.0037094	0.00401887	0.00432841	0.00463799	0.00494764	0.00525734	0.00556709	0.00587691	0.00618678	0.00649671	0.0068067	0.00711675	0.00742685	0.00773702	0.00804724	0.00835753	0.00866787	0.00897827	0.00928873	0.00959926	0.00990984	0.0102205	0.0105312	0.010842	0.0111528	0.0114637	0.0117746	0.0120856	0.0123967	0.0127079
0.1687	0.05					0.125	0.625	0	0.000307684	0.000615421	0.000923211	0.00123106	0.00153895	0.00184691	0.00215491	0.00246297	0.00277109	0.00307926	0.00338749	0.00369577	0.00400411	0.0043125	0.00462095	0.00492946	0.00523802	0.00554664	0.00585532	0.00616405	0.00647284	0.00678169	0.0070906	0.00739957	0.0077086	0.00801768	0.00832683	0.00863603	0.00894529	0.00925462	0.009564	0.00987344	0.0101829	0.0104925	0.0108021	0.0111118	0.0114216	0.0117314	0.0120413	0.0123512	0.0126612
0.1624	0.0475					0.1255	0.6275	0	0.000306557	0.000613168	0.000919832	0.00122655	0.00153332	0.00184014	0.00214702	0.00245396	0.00276095	0.00306799	0.00337509	0.00368224	0.00398945	0.00429672	0.00460404	0.00491142	0.00521885	0.00552634	0.00583389	0.0061415	0.00644916	0.00675688	0.00706466	0.0073725	0.00768039	0.00798835	0.00829636	0.00860444	0.00891257	0.00922076	0.00952902	0.00983733	0.0101457	0.0104541	0.0107626	0.0110712	0.0113798	0.0116885	0.0119972	0.012306	0.0126149
0.1561	0.045					0.126	0.63	0	0.00030544	0.000610932	0.000916478	0.00122208	0.00152773	0.00183344	0.0021392	0.00244501	0.00275088	0.00305681	0.00336278	0.00366882	0.00397491	0.00428105	0.00458726	0.00489352	0.00519983	0.0055062	0.00581263	0.00611912	0.00642566	0.00673226	0.00703892	0.00734564	0.00765241	0.00795924	0.00826614	0.00857309	0.0088801	0.00918717	0.00949431	0.0098015	0.0101087	0.0104161	0.0107234	0.0110309	0.0113384	0.0116459	0.0119535	0.0122612	0.012569
0.1499	0.0425					0.1265	0.6325	0	0.00030433	0.000608714	0.00091315	0.00121764	0.00152218	0.00182678	0.00213143	0.00243613	0.00274089	0.00304571	0.00335058	0.0036555	0.00396048	0.00426551	0.00457061	0.00487575	0.00518096	0.00548622	0.00579153	0.00609691	0.00640234	0.00670783	0.00701337	0.00731898	0.00762464	0.00793036	0.00823614	0.00854198	0.00884788	0.00915384	0.00945986	0.00976594	0.0100721	0.0103783	0.0106845	0.0109909	0.0112972	0.0116037	0.0119102	0.0122168	0.0125234
0.1437	0.04					0.127	0.635	0	0.00030323	0.000606512	0.000909847	0.00121324	0.00151668	0.00182017	0.00212372	0.00242732	0.00273098	0.00303469	0.00333846	0.00364228	0.00394616	0.00425009	0.00455408	0.00485813	0.00516223	0.00546638	0.0057706	0.00607487	0.0063792	0.00668358	0.00698803	0.00729253	0.00759709	0.00790171	0.00820638	0.00851112	0.00881591	0.00912077	0.00942568	0.00973066	0.0100357	0.0103408	0.0106459	0.0109512	0.0112564	0.0115618	0.0118672	0.0121726	0.0124782
0.1376	0.0375					0.1275	0.6375	0	0.000302137	0.000604327	0.00090657	0.00120887	0.00151121	0.00181362	0.00211607	0.00241858	0.00272115	0.00302377	0.00332644	0.00362917	0.00393195	0.00423479	0.00453768	0.00484063	0.00514364	0.0054467	0.00574982	0.006053	0.00635623	0.00665952	0.00696287	0.00726628	0.00756974	0.00787327	0.00817685	0.00848049	0.00878419	0.00908795	0.00939177	0.00969565	0.00999958	0.0103036	0.0106076	0.0109118	0.0112159	0.0115202	0.0118245	0.0121289	0.0124333
0.1315	0.035					0.128	0.64	0	0.000301053	0.000602159	0.000903317	0.00120453	0.00150579	0.00180711	0.00210848	0.00240991	0.00271139	0.00301292	0.00331451	0.00361615	0.00391785	0.0042196	0.00452141	0.00482328	0.0051252	0.00542717	0.00572921	0.0060313	0.00633345	0.00663565	0.00693791	0.00724023	0.00754261	0.00784505	0.00814754	0.0084501	0.00875271	0.00905538	0.00935811	0.0096609	0.00996376	0.0102667	0.0105696	0.0108727	0.0111758	0.0114789	0.0117821	0.0120854	0.0123888
0.1255	0.0325					0.1285	0.6425	0	0.000299977	0.000600007	0.000900089	0.00120022	0.00150041	0.00180065	0.00210095	0.0024013	0.0027017	0.00300216	0.00330267	0.00360323	0.00390386	0.00420453	0.00450526	0.00480605	0.0051069	0.00540779	0.00570875	0.00600976	0.00631083	0.00661196	0.00691314	0.00721439	0.00751569	0.00781704	0.00811846	0.00841994	0.00872147	0.00902306	0.00932472	0.00962643	0.0099282	0.01023	0.0105319	0.0108339	0.0111359	0.011438	0.0117401	0.0120423	0.0123446
0.1195	0.03					0.129	0.645	0	0.00029891	0.000597872	0.000896886	0.00119595	0.00149507	0.00179425	0.00209347	0.00239275	0.00269209	0.00299148	0.00329092	0.00359042	0.00388997	0.00418958	0.00448924	0.00478896	0.00508873	0.00538856	0.00568845	0.00598839	0.00628839	0.00658845	0.00688856	0.00718874	0.00748897	0.00778925	0.0080896	0.00839001	0.00869047	0.00899099	0.00929157	0.00959222	0.00989292	0.0101937	0.0104945	0.0107954	0.0110963	0.0113973	0.0116984	0.0119995	0.0123007
0.1136	0.0275					0.1295	0.6475	0	0.00029785	0.000595753	0.000893707	0.00119171	0.00148978	0.00178789	0.00208605	0.00238428	0.00268255	0.00298088	0.00327926	0.0035777	0.00387619	0.00417473	0.00447334	0.00477199	0.00507071	0.00536948	0.0056683	0.00596718	0.00626612	0.00656512	0.00686417	0.00716328	0.00746245	0.00776168	0.00806096	0.0083603	0.00865971	0.00895917	0.00925869	0.00955827	0.00985791	0.0101576	0.0104574	0.0107572	0.0110571	0.011357	0.011657	0.0119571	0.0122572
0.1077	0.025					0.13	0.65	0	0.000296799	0.00059365	0.000890553	0.00118751	0.00148452	0.00178158	0.00207869	0.00237586	0.00267308	0.00297036	0.00326769	0.00356507	0.00386251	0.00416001	0.00445755	0.00475516	0.00505282	0.00535054	0.00564831	0.00594614	0.00624402	0.00654197	0.00683997	0.00713802	0.00743614	0.00773431	0.00803254	0.00833083	0.00862918	0.00892758	0.00922605	0.00952457	0.00982316	0.0101218	0.0104205	0.0107193	0.0110181	0.011317	0.0116159	0.0119149	0.012214
0.1019	0.0225					0.1305	0.6525	0	0.000295755	0.000591562	0.000887422	0.00118333	0.0014793	0.00177532	0.00207139	0.00236751	0.00266369	0.00295992	0.0032562	0.00355254	0.00384894	0.00414539	0.00444189	0.00473845	0.00503507	0.00533174	0.00562847	0.00592525	0.00622209	0.00651899	0.00681594	0.00711295	0.00741002	0.00770715	0.00800433	0.00830158	0.00859888	0.00889624	0.00919366	0.00949114	0.00978868	0.0100863	0.0103839	0.0106817	0.0109794	0.0112773	0.0115752	0.0118731	0.0121712
0.096	0.02					0.131	0.655	0	0.000294719	0.000589491	0.000884314	0.00117919	0.00147412	0.0017691	0.00206413	0.00235922	0.00265436	0.00294956	0.00324481	0.00354011	0.00383547	0.00413088	0.00442635	0.00472187	0.00501745	0.00531308	0.00560877	0.00590452	0.00620032	0.00649618	0.0067921	0.00708807	0.00738411	0.0076802	0.00797634	0.00827255	0.00856881	0.00886514	0.00916152	0.00945796	0.00975446	0.010051	0.0103476	0.0106443	0.0109411	0.0112379	0.0115347	0.0118317	0.0121286
0.0902	0.0175					0.1315	0.6575	0	0.000293692	0.000587435	0.00088123	0.00117508	0.00146898	0.00176293	0.00205694	0.002351	0.00264511	0.00293928	0.0032335	0.00352777	0.0038221	0.00411648	0.00441092	0.00470542	0.00499996	0.00529457	0.00558923	0.00588395	0.00617872	0.00647355	0.00676844	0.00706338	0.00735839	0.00765345	0.00794856	0.00824374	0.00853897	0.00883427	0.00912962	0.00942503	0.0097205	0.010016	0.0103116	0.0106073	0.010903	0.0111988	0.0114946	0.0117905	0.0120864
0.0843	0.015					0.132	0.66	0	0.000292671	0.000585394	0.000878169	0.001171	0.00146388	0.00175681	0.00204979	0.00234283	0.00263592	0.00292907	0.00322227	0.00351552	0.00380883	0.00410219	0.00439561	0.00468908	0.00498261	0.0052762	0.00556984	0.00586353	0.00615728	0.00645109	0.00674496	0.00703888	0.00733286	0.0076269	0.00792099	0.00821515	0.00850936	0.00880363	0.00909796	0.00939235	0.0096868	0.0099813	0.0102759	0.0105705	0.0108652	0.0111599	0.0114547	0.0117496	0.0120445
0.0784	0.0125					0.1325	0.6625	0	0.000291659	0.000583369	0.000875131	0.00116695	0.00145881	0.00175073	0.0020427	0.00233473	0.00262681	0.00291894	0.00321113	0.00350337	0.00379566	0.00408801	0.00438042	0.00467287	0.00496539	0.00525796	0.00555059	0.00584327	0.00613601	0.0064288	0.00672165	0.00701456	0.00730753	0.00760055	0.00789363	0.00818677	0.00847997	0.00877323	0.00906654	0.00935991	0.00965335	0.00994684	0.0102404	0.010534	0.0108277	0.0111214	0.0114152	0.0117091	0.012003
0.0725	0.01					0.133	0.665	0	0.000290654	0.000581359	0.000872116	0.00116293	0.00145379	0.0017447	0.00203567	0.00232669	0.00261776	0.00290889	0.00320007	0.0034913	0.00378259	0.00407394	0.00436533	0.00465679	0.0049483	0.00523986	0.00553148	0.00582316	0.00611489	0.00640668	0.00669852	0.00699042	0.00728238	0.0075744	0.00786648	0.00815861	0.0084508	0.00874305	0.00903536	0.00932773	0.00962015	0.00991264	0.0102052	0.0104978	0.0107905	0.0110832	0.011376	0.0116688	0.0119617
0.0665	0.0075					0.1335	0.6675	0	0.000289656	0.000579364	0.000869123	0.00115894	0.0014488	0.00173872	0.00202868	0.00231871	0.00260878	0.00289891	0.00318909	0.00347933	0.00376962	0.00405997	0.00435037	0.00464082	0.00493133	0.0052219	0.00551252	0.0058032	0.00609393	0.00638472	0.00667557	0.00696647	0.00725743	0.00754845	0.00783952	0.00813066	0.00842185	0.0087131	0.00900441	0.00929578	0.00958721	0.00987869	0.0101702	0.0104618	0.0107535	0.0110452	0.011337	0.0116289	0.0119208
0.0603	0.005					0.134	0.67	0	0.000288666	0.000577384	0.000866153	0.00115497	0.00144385	0.00173277	0.00202175	0.00231078	0.00259987	0.00288901	0.0031782	0.00346745	0.00375675	0.0040461	0.00433551	0.00462497	0.00491449	0.00520407	0.0054937	0.00578338	0.00607313	0.00636293	0.00665278	0.00694269	0.00723266	0.00752269	0.00781277	0.00810292	0.00839312	0.00868338	0.00897369	0.00926407	0.00955451	0.009845	0.0101356	0.0104262	0.0107168	0.0110076	0.0112984	0.0115892	0.0118802
0.054	0.0025					0.1345	0.6725	0	0.000287683	0.000575418	0.000863205	0.00115104	0.00143893	0.00172688	0.00201487	0.00230292	0.00259102	0.00287918	0.00316739	0.00345565	0.00374397	0.00403234	0.00432076	0.00460924	0.00489778	0.00518637	0.00547502	0.00576372	0.00605248	0.00634129	0.00663017	0.00691909	0.00720808	0.00749712	0.00778622	0.00807538	0.0083646	0.00865388	0.00894321	0.0092326	0.00952205	0.00981156	0.0101011	0.0103908	0.0106805	0.0109702	0.01126	0.0115499	0.0118398
0.0477	0					0.135	0.675	0	0.000286708	0.000573467	0.000860278	0.00114714	0.00143406	0.00172102	0.00200804	0.00229512	0.00258224	0.00286942	0.00315665	0.00344394	0.00373128	0.00401868	0.00430613	0.00459363	0.00488119	0.00516881	0.00545648	0.0057442	0.00603199	0.00631983	0.00660772	0.00689567	0.00718368	0.00747175	0.00775987	0.00804806	0.0083363	0.00862459	0.00891295	0.00920137	0.00948984	0.00977838	0.010067	0.0103556	0.0106443	0.0109331	0.0112219	0.0115108	0.0117998
						0.1355	0.6775	0	0.00028574	0.000571531	0.000857374	0.00114327	0.00142921	0.00171521	0.00200127	0.00228737	0.00257353	0.00285974	0.003146	0.00343232	0.00371869	0.00400512	0.0042916	0.00457814	0.00486473	0.00515137	0.00543807	0.00572483	0.00601165	0.00629852	0.00658544	0.00687243	0.00715947	0.00744656	0.00773372	0.00802093	0.0083082	0.00859553	0.00888292	0.00917037	0.00945787	0.00974544	0.0100331	0.0103207	0.0106085	0.0108963	0.0111842	0.0114721	0.0117601
						0.136	0.68	0	0.000284779	0.000569609	0.00085449	0.00113942	0.00142441	0.00170945	0.00199454	0.00227968	0.00256488	0.00285013	0.00313543	0.00342079	0.0037062	0.00399166	0.00427718	0.00456276	0.00484838	0.00513407	0.00541981	0.0057056	0.00599146	0.00627736	0.00656333	0.00684935	0.00713543	0.00742157	0.00770776	0.00799401	0.00828032	0.00856669	0.00885311	0.0091396	0.00942614	0.00971274	0.00999941	0.0102861	0.0105729	0.0108598	0.0111467	0.0114336	0.0117206
						0.1365	0.6825	0	0.000283825	0.000567701	0.000851628	0.00113561	0.00141964	0.00170372	0.00198786	0.00227205	0.00255629	0.00284058	0.00312493	0.00340934	0.00369379	0.0039783	0.00426287	0.00454749	0.00483216	0.00511689	0.00540168	0.00568652	0.00597142	0.00625637	0.00654138	0.00682645	0.00711157	0.00739675	0.00768199	0.00796729	0.00825264	0.00853805	0.00882353	0.00910905	0.00939464	0.00968029	0.009966	0.0102518	0.0105376	0.0108235	0.0111094	0.0113954	0.0116815
						0.137	0.685	0	0.000282878	0.000565807	0.000848787	0.00113182	0.0014149	0.00169804	0.00198123	0.00226447	0.00254777	0.00283111	0.00311452	0.00339797	0.00368148	0.00396504	0.00424866	0.00453233	0.00481606	0.00509984	0.00538368	0.00566758	0.00595153	0.00623553	0.00651959	0.00680371	0.00708789	0.00737212	0.00765641	0.00794076	0.00822517	0.00850963	0.00879416	0.00907874	0.00936338	0.00964808	0.00993284	0.0102177	0.0105025	0.0107875	0.0110725	0.0113575	0.0116427
						0.1375	0.6875	0	0.000281938	0.000563927	0.000845967	0.00112806	0.0014102	0.0016924	0.00197465	0.00225695	0.00253931	0.00282171	0.00310417	0.00338669	0.00366926	0.00395188	0.00423456	0.00451729	0.00480008	0.00508292	0.00536582	0.00564877	0.00593178	0.00621485	0.00649797	0.00678115	0.00706438	0.00734768	0.00763103	0.00791444	0.0081979	0.00848143	0.00876501	0.00904865	0.00933235	0.00961611	0.00989993	0.0101838	0.0104677	0.0107517	0.0110358	0.0113199	0.0116041
						0.138	0.69	0	0.000281005	0.000562061	0.000843168	0.00112433	0.00140554	0.0016868	0.00196812	0.00224949	0.00253091	0.00281238	0.00309391	0.00337549	0.00365713	0.00393882	0.00422056	0.00450236	0.00478421	0.00506612	0.00534809	0.00563011	0.00591218	0.00619432	0.0064765	0.00675875	0.00704105	0.00732341	0.00760583	0.0078883	0.00817083	0.00845343	0.00873607	0.00901878	0.00930155	0.00958438	0.00986726	0.0101502	0.0104332	0.0107163	0.0109994	0.0112826	0.0115658
						0.1385	0.6925	0	0.000280078	0.000560208	0.000840389	0.00112062	0.00140091	0.00168124	0.00196163	0.00224207	0.00252257	0.00280312	0.00308372	0.00336437	0.00364508	0.00392585	0.00420667	0.00448754	0.00476846	0.00504945	0.00533049	0.00561158	0.00589273	0.00617393	0.0064552	0.00673651	0.00701789	0.00729932	0.00758081	0.00786236	0.00814397	0.00842563	0.00870735	0.00898914	0.00927098	0.00955288	0.00983483	0.0101169	0.0103989	0.0106811	0.0109633	0.0112455	0.0115279
						0.139	0.695	0	0.000279159	0.000558369	0.000837631	0.00111694	0.00139631	0.00167573	0.0019552	0.00223472	0.00251429	0.00279392	0.0030736	0.00335334	0.00363313	0.00391297	0.00419287	0.00447282	0.00475283	0.00503289	0.00531301	0.00559319	0.00587342	0.0061537	0.00643404	0.00671444	0.0069949	0.00727541	0.00755598	0.00783661	0.0081173	0.00839804	0.00867885	0.00895971	0.00924063	0.00952161	0.00980265	0.0100837	0.0103649	0.0106461	0.0109274	0.0112087	0.0114901
						0.1395	0.6975	0	0.000278246	0.000556543	0.000834892	0.00111329	0.00139175	0.00167025	0.00194881	0.00222742	0.00250608	0.00278479	0.00306356	0.00334239	0.00362126	0.00390019	0.00417918	0.00445822	0.00473731	0.00501646	0.00529567	0.00557493	0.00585425	0.00613362	0.00641305	0.00669253	0.00697208	0.00725168	0.00753134	0.00781105	0.00809082	0.00837066	0.00865055	0.00893049	0.0092105	0.00949057	0.00977069	0.0100509	0.0103311	0.0106114	0.0108918	0.0111722	0.0114527
						0.14	0.7	0	0.00027734	0.000554731	0.000832174	0.00110967	0.00138721	0.00166481	0.00194246	0.00222017	0.00249792	0.00277573	0.0030536	0.00333151	0.00360948	0.00388751	0.00416559	0.00444372	0.00472191	0.00500015	0.00527845	0.00555681	0.00583522	0.00611368	0.00639221	0.00667079	0.00694942	0.00722812	0.00750687	0.00778568	0.00806454	0.00834347	0.00862245	0.0089015	0.0091806	0.00945976	0.00973898	0.0100183	0.0102976	0.010577	0.0108565	0.011136	0.0114156
						0.1405	0.7025	0	0.00027644	0.000552932	0.000829475	0.00110607	0.00138272	0.00165942	0.00193617	0.00221297	0.00248983	0.00276674	0.0030437	0.00332072	0.00359779	0.00387491	0.00415209	0.00442933	0.00470662	0.00498396	0.00526136	0.00553881	0.00581633	0.00609389	0.00637152	0.0066492	0.00692693	0.00720473	0.00748258	0.00776049	0.00803846	0.00831648	0.00859457	0.00887271	0.00915091	0.00942917	0.00970749	0.00998587	0.0102643	0.0105428	0.0108214	0.0111	0.0113787
						0.141	0.705	0	0.000275547	0.000551146	0.000826796	0.0011025	0.00137825	0.00165406	0.00192992	0.00220583	0.00248179	0.00275781	0.00303388	0.00331	0.00358618	0.00386241	0.0041387	0.00441504	0.00469143	0.00496789	0.00524439	0.00552095	0.00579757	0.00607425	0.00635098	0.00662776	0.00690461	0.00718151	0.00745847	0.00773549	0.00801256	0.00828969	0.00856688	0.00884413	0.00912144	0.00939881	0.00967624	0.00995373	0.0102313	0.0105089	0.0107866	0.0110643	0.0113421
						0.1415	0.7075	0	0.000274661	0.000549373	0.000824136	0.00109895	0.00137382	0.00164874	0.00192371	0.00219873	0.00247381	0.00274894	0.00302412	0.00329936	0.00357465	0.00385	0.0041254	0.00440085	0.00467636	0.00495193	0.00522755	0.00550322	0.00577896	0.00605474	0.00633059	0.00660649	0.00688245	0.00715846	0.00743453	0.00771066	0.00798685	0.0082631	0.0085394	0.00881577	0.00909219	0.00936867	0.00964521	0.00992182	0.0101985	0.0104752	0.010752	0.0110288	0.0113057
						0.142	0.71	0	0.000273781	0.000547612	0.000821496	0.00109543	0.00136942	0.00164346	0.00191755	0.00219169	0.00246589	0.00274014	0.00301444	0.0032888	0.00356321	0.00383768	0.0041122	0.00438677	0.0046614	0.00493609	0.00521083	0.00548562	0.00576047	0.00603538	0.00631035	0.00658537	0.00686045	0.00713558	0.00741077	0.00768602	0.00796133	0.0082367	0.00851212	0.00878761	0.00906315	0.00933875	0.00961441	0.00989014	0.0101659	0.0104418	0.0107177	0.0109936	0.0112696
						0.1425	0.7125	0	0.000272907	0.000545865	0.000818874	0.00109194	0.00136505	0.00163821	0.00191143	0.0021847	0.00245803	0.0027314	0.00300483	0.00327832	0.00355185	0.00382544	0.00409909	0.00437279	0.00464655	0.00492036	0.00519423	0.00546815	0.00574213	0.00601616	0.00629025	0.0065644	0.0068386	0.00711287	0.00738718	0.00766156	0.007936	0.00821049	0.00848504	0.00875965	0.00903432	0.00930905	0.00958384	0.00985869	0.0101336	0.0104086	0.0106836	0.0109587	0.0112338
						0.143	0.715	0	0.000272039	0.00054413	0.000816272	0.00108847	0.00136071	0.00163301	0.00190536	0.00217776	0.00245022	0.00272273	0.00299529	0.00326791	0.00354058	0.0038133	0.00408608	0.00435891	0.0046318	0.00490475	0.00517774	0.0054508	0.00572391	0.00599708	0.0062703	0.00654358	0.00681692	0.00709031	0.00736377	0.00763728	0.00791084	0.00818447	0.00845816	0.0087319	0.0090057	0.00927956	0.00955348	0.00982747	0.0101015	0.0103756	0.0106498	0.010924	0.0111983
						0.1435	0.7175	0	0.000271178	0.000542407	0.000813688	0.00108502	0.0013564	0.00162784	0.00189933	0.00217087	0.00244247	0.00271411	0.00298582	0.00325757	0.00352938	0.00380124	0.00407316	0.00434513	0.00461716	0.00488924	0.00516138	0.00543358	0.00570583	0.00597813	0.0062505	0.00652292	0.00679539	0.00706793	0.00734052	0.00761317	0.00788587	0.00815864	0.00843146	0.00870435	0.00897729	0.00925029	0.00952335	0.00979647	0.0100697	0.0103429	0.0106162	0.0108896	0.011163
						0.144	0.72	0	0.000270323	0.000540697	0.000811122	0.0010816	0.00135213	0.00162271	0.00189334	0.00216403	0.00243477	0.00270556	0.00297641	0.00324731	0.00351827	0.00378927	0.00406034	0.00433145	0.00460263	0.00487386	0.00514514	0.00541648	0.00568787	0.00595933	0.00623083	0.0065024	0.00677402	0.0070457	0.00731744	0.00758923	0.00786108	0.008133	0.00840497	0.00867699	0.00894908	0.00922123	0.00949344	0.0097657	0.010038	0.0103104	0.0105829	0.0108554	0.0111279
						0.1445	0.7225	0	0.000269474	0.000538999	0.000808575	0.0010782	0.00134788	0.00161762	0.0018874	0.00215724	0.00242713	0.00269707	0.00296707	0.00323712	0.00350723	0.00377739	0.0040476	0.00431787	0.0045882	0.00485858	0.00512901	0.0053995	0.00567005	0.00594065	0.00621131	0.00648203	0.0067528	0.00702363	0.00729452	0.00756547	0.00783647	0.00810754	0.00837866	0.00864984	0.00892108	0.00919238	0.00946374	0.00973515	0.0100066	0.0102782	0.0105498	0.0108214	0.0110932
						0.145	0.725	0	0.000268631	0.000537313	0.000806046	0.00107483	0.00134367	0.00161256	0.0018815	0.0021505	0.00241954	0.00268865	0.0029578	0.00322701	0.00349627	0.00376559	0.00403496	0.00430439	0.00457387	0.00484341	0.005113	0.00538265	0.00565235	0.00592211	0.00619193	0.00646181	0.00673174	0.00700173	0.00727177	0.00754188	0.00781204	0.00808226	0.00835254	0.00862288	0.00889328	0.00916373	0.00943425	0.00970483	0.00997546	0.0102462	0.0105169	0.0107877	0.0110586
						0.1455	0.7275	0	0.000267794	0.000535639	0.000803536	0.00107148	0.00133948	0.00160754	0.00187564	0.0021438	0.00241201	0.00268028	0.0029486	0.00321697	0.0034854	0.00375388	0.00402241	0.004291	0.00455965	0.00482835	0.0050971	0.00536592	0.00563478	0.00590371	0.00617269	0.00644173	0.00671082	0.00697998	0.00724919	0.00751845	0.00778778	0.00805717	0.00832661	0.00859611	0.00886567	0.00913529	0.00940498	0.00967472	0.00994452	0.0102144	0.0104843	0.0107543	0.0110243
						0.146	0.73	0	0.000266963	0.000533977	0.000801043	0.00106816	0.00133533	0.00160255	0.00186983	0.00213715	0.00240454	0.00267197	0.00293946	0.003207	0.00347459	0.00374225	0.00400995	0.00427771	0.00454552	0.00481339	0.00508132	0.0053493	0.00561734	0.00588543	0.00615359	0.00642179	0.00669006	0.00695838	0.00722676	0.0074952	0.0077637	0.00803225	0.00830086	0.00856954	0.00883827	0.00910706	0.00937591	0.00964482	0.00991379	0.0101828	0.0104519	0.0107211	0.0109903
						0.1465	0.7325	0	0.000266138	0.000532327	0.000798567	0.00106486	0.0013312	0.0015976	0.00186405	0.00213055	0.00239711	0.00266372	0.00293038	0.0031971	0.00346387	0.0037307	0.00399758	0.00426451	0.0045315	0.00479855	0.00506565	0.00533281	0.00560002	0.00586729	0.00613462	0.006402	0.00666944	0.00693694	0.0072045	0.00747211	0.00773978	0.00800751	0.0082753	0.00854315	0.00881106	0.00907903	0.00934706	0.00961514	0.00988329	0.0101515	0.0104198	0.0106881	0.0109565
						0.147	0.735	0	0.000265318	0.000530688	0.00079611	0.00106158	0.00132711	0.00159269	0.00185832	0.002124	0.00238974	0.00265553	0.00292137	0.00318727	0.00345322	0.00371923	0.00398529	0.00425141	0.00451758	0.00478381	0.00505009	0.00531643	0.00558283	0.00584928	0.00611579	0.00638235	0.00664897	0.00691565	0.00718239	0.00744919	0.00771604	0.00798295	0.00824993	0.00851696	0.00878405	0.0090512	0.00931841	0.00958568	0.00985301	0.0101204	0.0103878	0.0106554	0.0109229
						0.1475	0.7375	0	0.000264505	0.000529061	0.000793669	0.00105833	0.00132304	0.00158781	0.00185262	0.0021175	0.00238242	0.0026474	0.00291243	0.00317751	0.00344265	0.00370785	0.0039731	0.0042384	0.00450376	0.00476917	0.00503464	0.00530017	0.00556575	0.00583139	0.00609709	0.00636284	0.00662865	0.00689452	0.00716044	0.00742643	0.00769247	0.00795857	0.00822473	0.00849095	0.00875723	0.00902356	0.00928996	0.00955642	0.00982294	0.0100895	0.0103562	0.0106229	0.0108896
						0.148	0.74	0	0.000263697	0.000527446	0.000791246	0.0010551	0.001319	0.00158296	0.00184697	0.00211103	0.00237515	0.00263932	0.00290355	0.00316782	0.00343216	0.00369654	0.00396098	0.00422548	0.00449003	0.00475464	0.0050193	0.00528402	0.0055488	0.00581363	0.00607852	0.00634347	0.00660847	0.00687353	0.00713865	0.00740383	0.00766906	0.00793436	0.00819971	0.00846512	0.0087306	0.00899613	0.00926172	0.00952737	0.00979308	0.0100589	0.0103247	0.0105906	0.0108565
						0.1485	0.7425	0	0.000262895	0.000525842	0.00078884	0.00105189	0.00131499	0.00157815	0.00184136	0.00210462	0.00236793	0.0026313	0.00289473	0.0031582	0.00342173	0.00368532	0.00394896	0.00421265	0.0044764	0.00474021	0.00500407	0.00526799	0.00553197	0.005796	0.00606009	0.00632423	0.00658843	0.0068527	0.00711701	0.00738139	0.00764583	0.00791032	0.00817487	0.00843948	0.00870416	0.00896889	0.00923368	0.00949853	0.00976344	0.0100284	0.0102934	0.0105585	0.0108237
						0.149	0.745	0	0.000262099	0.000524249	0.000786451	0.00104871	0.00131101	0.00157337	0.00183578	0.00209825	0.00236077	0.00262334	0.00288597	0.00314865	0.00341138	0.00367417	0.00393702	0.00419992	0.00446287	0.00472588	0.00498895	0.00525207	0.00551525	0.00577849	0.00604178	0.00630513	0.00656854	0.00683201	0.00709553	0.00735911	0.00762275	0.00788645	0.00815021	0.00841403	0.0086779	0.00894184	0.00920584	0.00946989	0.00973401	0.00999819	0.0102624	0.0105267	0.0107911
						0.1495	0.7475	0	0.000261308	0.000522668	0.000784079	0.00104554	0.00130706	0.00156863	0.00183025	0.00209193	0.00235365	0.00261544	0.00287727	0.00313916	0.00340111	0.00366311	0.00392516	0.00418727	0.00444944	0.00471166	0.00497393	0.00523627	0.00549866	0.0057611	0.00602361	0.00628617	0.00654879	0.00681146	0.0070742	0.00733699	0.00759984	0.00786275	0.00812572	0.00838875	0.00865183	0.00891498	0.00917819	0.00944146	0.00970479	0.00996818	0.0102316	0.0104951	0.0107587
						0.15	0.75	0	0.000260523	0.000521097	0.000781724	0.0010424	0.00130313	0.00156392	0.00182475	0.00208564	0.00234659	0.00260759	0.00286864	0.00312974	0.0033909	0.00365212	0.00391339	0.00417471	0.00443609	0.00469753	0.00495902	0.00522057	0.00548218	0.00574384	0.00600556	0.00626734	0.00652917	0.00679106	0.00705301	0.00731502	0.00757709	0.00783922	0.0081014	0.00836365	0.00862595	0.00888832	0.00915074	0.00941322	0.00967577	0.00993838	0.010201	0.0104638	0.0107266
						0.1505	0.7525	0	0.000259743	0.000519538	0.000779384	0.00103928	0.00129924	0.00155924	0.0018193	0.00207941	0.00233957	0.00259979	0.00286006	0.00312039	0.00338077	0.00364121	0.0039017	0.00416224	0.00442285	0.0046835	0.00494422	0.00520499	0.00546582	0.0057267	0.00598764	0.00624864	0.0065097	0.00677081	0.00703198	0.00729321	0.0075545	0.00781585	0.00807726	0.00833872	0.00860025	0.00886184	0.00912348	0.00938519	0.00964696	0.00990879	0.0101707	0.0104326	0.0106946
						0.151	0.755	0	0.000258969	0.000517989	0.000777062	0.00103619	0.00129536	0.00155459	0.00181388	0.00207321	0.00233261	0.00259205	0.00285155	0.0031111	0.00337071	0.00363037	0.00389009	0.00414986	0.00440969	0.00466958	0.00492952	0.00518951	0.00544957	0.00570968	0.00596985	0.00623007	0.00649036	0.0067507	0.0070111	0.00727155	0.00753207	0.00779265	0.00805328	0.00831398	0.00857473	0.00883554	0.00909642	0.00935735	0.00961835	0.00987941	0.0101405	0.0104017	0.0106629
						0.1515	0.7575	0	0.0002582	0.000516451	0.000774755	0.00103311	0.00129152	0.00154998	0.0018085	0.00206707	0.00232569	0.00258436	0.00284309	0.00310188	0.00336072	0.00361961	0.00387856	0.00413757	0.00439663	0.00465574	0.00491492	0.00517415	0.00543343	0.00569278	0.00595218	0.00621164	0.00647115	0.00673073	0.00699036	0.00725005	0.0075098	0.00776961	0.00802947	0.0082894	0.00854939	0.00880944	0.00906954	0.00932971	0.00958994	0.00985023	0.0101106	0.010371	0.0106315
						0.152	0.76	0	0.000257436	0.000514924	0.000772464	0.00103006	0.0012877	0.0015454	0.00180315	0.00206096	0.00231882	0.00257673	0.0028347	0.00309272	0.0033508	0.00360893	0.00386712	0.00412536	0.00438366	0.00464201	0.00490042	0.00515889	0.00541741	0.00567599	0.00593463	0.00619333	0.00645208	0.00671089	0.00696976	0.00722869	0.00748768	0.00774673	0.00800583	0.008265	0.00852423	0.00878351	0.00904286	0.00930227	0.00956174	0.00982126	0.0100809	0.0103405	0.0106002
						0.1525	0.7625	0	0.000256678	0.000513408	0.00077019	0.00102702	0.00128391	0.00154085	0.00179785	0.00205489	0.002312	0.00256915	0.00282636	0.00308362	0.00334094	0.00359832	0.00385575	0.00411323	0.00437077	0.00462837	0.00488603	0.00514374	0.0054015	0.00565933	0.00591721	0.00617515	0.00643315	0.0066912	0.00694931	0.00720749	0.00746572	0.00772401	0.00798236	0.00824077	0.00849924	0.00875777	0.00901636	0.00927501	0.00953372	0.0097925	0.0100513	0.0103102	0.0105692
						0.153	0.765	0	0.000255925	0.000511901	0.000767931	0.00102401	0.00128015	0.00153634	0.00179258	0.00204887	0.00230522	0.00256162	0.00281808	0.00307459	0.00333116	0.00358778	0.00384446	0.00410119	0.00435798	0.00461483	0.00487173	0.00512869	0.0053857	0.00564278	0.00589991	0.00615709	0.00641434	0.00667164	0.00692901	0.00718643	0.00744391	0.00770145	0.00795905	0.00821671	0.00847443	0.00873221	0.00899005	0.00924795	0.00950591	0.00976393	0.010022	0.0102802	0.0105384
						0.1535	0.7675	0	0.000255177	0.000510406	0.000765687	0.00102102	0.00127641	0.00153185	0.00178734	0.00204289	0.00229849	0.00255415	0.00280986	0.00306562	0.00332144	0.00357732	0.00383325	0.00408924	0.00434528	0.00460138	0.00485753	0.00511375	0.00537001	0.00562634	0.00588272	0.00613917	0.00639567	0.00665223	0.00690884	0.00716552	0.00742225	0.00767905	0.0079359	0.00819281	0.00844979	0.00870682	0.00896392	0.00922107	0.00947829	0.00973557	0.00999291	0.0102503	0.0105078
						0.154	0.77	0	0.000254434	0.000508921	0.00076346	0.00101805	0.0012727	0.00152739	0.00178215	0.00203695	0.00229181	0.00254672	0.00280169	0.00305672	0.00331179	0.00356693	0.00382212	0.00407736	0.00433266	0.00458802	0.00484344	0.00509891	0.00535443	0.00561002	0.00586566	0.00612136	0.00637712	0.00663294	0.00688882	0.00714475	0.00740075	0.0076568	0.00791291	0.00816909	0.00842532	0.00868161	0.00893797	0.00919438	0.00945086	0.0097074	0.009964	0.0102207	0.0104774
						0.1545	0.7725	0	0.000253697	0.000507446	0.000761247	0.0010151	0.00126901	0.00152297	0.00177698	0.00203105	0.00228518	0.00253935	0.00279358	0.00304787	0.00330221	0.00355661	0.00381106	0.00406557	0.00432014	0.00457476	0.00482943	0.00508417	0.00533896	0.00559381	0.00584872	0.00610368	0.00635871	0.00661379	0.00686893	0.00712413	0.00737939	0.00763471	0.00789009	0.00814552	0.00840102	0.00865658	0.0089122	0.00916788	0.00942362	0.00967943	0.0099353	0.0101912	0.0104472
						0.155	0.775	0	0.000252964	0.000505981	0.00075905	0.00101217	0.00126535	0.00151858	0.00177186	0.0020252	0.00227859	0.00253203	0.00278553	0.00303909	0.0032927	0.00354636	0.00380008	0.00405386	0.00430769	0.00456158	0.00481553	0.00506953	0.0053236	0.00557771	0.00583189	0.00608613	0.00634042	0.00659477	0.00684918	0.00710365	0.00735818	0.00761277	0.00786742	0.00812212	0.00837689	0.00863172	0.00888661	0.00914156	0.00939658	0.00965165	0.00990679	0.010162	0.0104172
						0.1555	0.7775	0	0.000252237	0.000504526	0.000756868	0.00100926	0.00126171	0.00151421	0.00176677	0.00201938	0.00227204	0.00252476	0.00277753	0.00303036	0.00328325	0.00353618	0.00378918	0.00404223	0.00429534	0.0045485	0.00480172	0.005055	0.00530834	0.00556173	0.00581518	0.00606869	0.00632226	0.00657588	0.00682957	0.00708331	0.00733712	0.00759098	0.0078449	0.00809889	0.00835293	0.00860703	0.0088612	0.00911543	0.00936972	0.00962407	0.00987848	0.010133	0.0103875
						0.156	0.78	0	0.000251514	0.000503081	0.0007547	0.00100637	0.0012581	0.00150988	0.00176171	0.0020136	0.00226554	0.00251754	0.00276959	0.0030217	0.00327386	0.00352608	0.00377835	0.00403068	0.00428307	0.00453551	0.00478801	0.00504057	0.00529318	0.00554585	0.00579858	0.00605137	0.00630422	0.00655713	0.00681009	0.00706311	0.0073162	0.00756934	0.00782254	0.00807581	0.00832913	0.00858252	0.00883596	0.00908947	0.00934304	0.00959667	0.00985037	0.0101041	0.0103579
						0.1565	0.7825	0	0.000250797	0.000501646	0.000752548	0.0010035	0.00125451	0.00150557	0.00175669	0.00200786	0.00225909	0.00251037	0.0027617	0.00301309	0.00326454	0.00351604	0.0037676	0.00401921	0.00427088	0.00452261	0.00477439	0.00502623	0.00527813	0.00553009	0.0057821	0.00603418	0.00628631	0.0065385	0.00679075	0.00704306	0.00729542	0.00754785	0.00780034	0.00805289	0.0083055	0.00855817	0.0088109	0.0090637	0.00931655	0.00956947	0.00982245	0.0100755	0.0103286
						0.157	0.785	0	0.000250084	0.000500221	0.00075041	0.00100065	0.00125095	0.0015013	0.0017517	0.00200216	0.00225268	0.00250324	0.00275387	0.00300455	0.00325528	0.00350607	0.00375692	0.00400782	0.00425878	0.00450979	0.00476087	0.005012	0.00526318	0.00551443	0.00576573	0.0060171	0.00626852	0.00652	0.00677154	0.00702314	0.00727479	0.00752651	0.00777829	0.00803013	0.00828203	0.00853399	0.00878601	0.0090381	0.00929024	0.00954245	0.00979472	0.0100471	0.0102994
						0.1575	0.7875	0	0.000249376	0.000498805	0.000748287	0.000997823	0.00124741	0.00149705	0.00174675	0.0019965	0.00224631	0.00249617	0.00274609	0.00299606	0.00324609	0.00349617	0.00374631	0.0039965	0.00424676	0.00449707	0.00474743	0.00499786	0.00524834	0.00549888	0.00574948	0.00600013	0.00625085	0.00650162	0.00675246	0.00700335	0.0072543	0.00750532	0.00775639	0.00800753	0.00825872	0.00850998	0.00876129	0.00901267	0.00926411	0.00951562	0.00976718	0.0100188	0.0102705
						0.158	0.79	0	0.000248673	0.000497399	0.000746179	0.000995011	0.0012439	0.00149284	0.00174183	0.00199088	0.00223999	0.00248915	0.00273836	0.00298763	0.00323695	0.00348634	0.00373577	0.00398527	0.00423482	0.00448443	0.00473409	0.00498382	0.0052336	0.00548344	0.00573333	0.00598329	0.0062333	0.00648338	0.00673351	0.0069837	0.00723396	0.00748427	0.00773464	0.00798508	0.00823557	0.00848613	0.00873674	0.00898742	0.00923817	0.00948897	0.00973984	0.00999076	0.0102418
						0.1585	0.7925	0	0.000247975	0.000496003	0.000744084	0.000992219	0.00124041	0.00148865	0.00173695	0.0019853	0.00223371	0.00248217	0.00273068	0.00297926	0.00322789	0.00347657	0.00372531	0.00397411	0.00422296	0.00447187	0.00472084	0.00496987	0.00521895	0.0054681	0.0057173	0.00596656	0.00621588	0.00646525	0.00671469	0.00696419	0.00721375	0.00746336	0.00771304	0.00796278	0.00821258	0.00846244	0.00871236	0.00896235	0.00921239	0.0094625	0.00971268	0.00996291	0.0102132
						0.159	0.795	0	0.000247281	0.000494616	0.000742004	0.000989446	0.00123694	0.00148449	0.00173209	0.00197975	0.00222747	0.00247524	0.00272306	0.00297094	0.00321888	0.00346687	0.00371492	0.00396302	0.00421119	0.00445941	0.00470768	0.00495602	0.00520441	0.00545286	0.00570137	0.00594994	0.00619857	0.00644725	0.006696	0.00694481	0.00719367	0.0074426	0.00769159	0.00794064	0.00818975	0.00843892	0.00868815	0.00893744	0.0091868	0.00943622	0.0096857	0.00993525	0.0101849
						0.1595	0.7975	0	0.000246593	0.000493238	0.000739938	0.000986691	0.0012335	0.00148036	0.00172728	0.00197425	0.00222127	0.00246835	0.00271549	0.00296268	0.00320993	0.00345723	0.0037046	0.00395201	0.00419949	0.00444702	0.00469461	0.00494226	0.00518997	0.00543773	0.00568555	0.00593344	0.00618138	0.00642938	0.00667744	0.00692556	0.00717374	0.00742198	0.00767028	0.00791864	0.00816707	0.00841555	0.0086641	0.00891271	0.00916138	0.00941011	0.00965891	0.00990777	0.0101567
						0.16	0.8	0	0.000245908	0.00049187	0.000737886	0.000983955	0.00123008	0.00147626	0.00172249	0.00196878	0.00221512	0.00246152	0.00270797	0.00295448	0.00320104	0.00344767	0.00369434	0.00394108	0.00418787	0.00443472	0.00468163	0.0049286	0.00517562	0.0054227	0.00566984	0.00591704	0.0061643	0.00641162	0.006659	0.00690644	0.00715394	0.0074015	0.00764912	0.0078968	0.00814454	0.00839235	0.00864021	0.00888814	0.00913613	0.00938419	0.0096323	0.00988048	0.0101287
						0.1605	0.8025	0	0.000245229	0.000490511	0.000735847	0.000981237	0.00122668	0.00147218	0.00171773	0.00196334	0.00220901	0.00245472	0.0027005	0.00294633	0.00319222	0.00343816	0.00368416	0.00393022	0.00417633	0.00442251	0.00466874	0.00491502	0.00516137	0.00540778	0.00565424	0.00590076	0.00614735	0.00639399	0.00664069	0.00688745	0.00713427	0.00738116	0.0076281	0.00787511	0.00812217	0.0083693	0.00861649	0.00886374	0.00911106	0.00935844	0.00960588	0.00985338	0.0101009
						0.161	0.805	0	0.000244554	0.000489161	0.000733823	0.000978538	0.00122331	0.00146813	0.00171301	0.00195794	0.00220293	0.00244798	0.00269308	0.00293824	0.00318345	0.00342872	0.00367405	0.00391943	0.00416487	0.00441037	0.00465593	0.00490154	0.00514722	0.00539295	0.00563874	0.00588459	0.0061305	0.00637647	0.0066225	0.00686859	0.00711474	0.00736095	0.00760722	0.00785356	0.00809995	0.00834641	0.00859293	0.00883951	0.00908615	0.00933286	0.00957963	0.00982646	0.0100734
						0.1615	0.8075	0	0.000243883	0.00048782	0.000731811	0.000975857	0.00121996	0.00146411	0.00170832	0.00195258	0.0021969	0.00244128	0.00268571	0.0029302	0.00317474	0.00341934	0.003664	0.00390872	0.00415349	0.00439832	0.00464321	0.00488815	0.00513316	0.00537822	0.00562335	0.00586853	0.00611377	0.00635907	0.00660444	0.00684986	0.00709534	0.00734088	0.00758649	0.00783216	0.00807788	0.00832367	0.00856953	0.00881544	0.00906142	0.00930746	0.00955356	0.00979973	0.010046
						0.162	0.81	0	0.000243217	0.000486489	0.000729814	0.000973193	0.00121663	0.00146012	0.00170366	0.00194726	0.00219091	0.00243462	0.00267839	0.00292221	0.00316609	0.00341003	0.00365402	0.00389807	0.00414218	0.00438635	0.00463057	0.00487486	0.0051192	0.0053636	0.00560806	0.00585258	0.00609715	0.00634179	0.00658649	0.00683125	0.00707607	0.00732095	0.00756589	0.0078109	0.00805596	0.00830109	0.00854628	0.00879153	0.00903685	0.00928223	0.00952767	0.00977317	0.0100187
						0.1625	0.8125	0	0.000242556	0.000485166	0.00072783	0.000970548	0.00121332	0.00145615	0.00169903	0.00194197	0.00218496	0.00242801	0.00267112	0.00291428	0.0031575	0.00340078	0.00364411	0.0038875	0.00413095	0.00437446	0.00461802	0.00486165	0.00510533	0.00534907	0.00559287	0.00583673	0.00608065	0.00632463	0.00656867	0.00681277	0.00705693	0.00730115	0.00754544	0.00778978	0.00803419	0.00827866	0.00852319	0.00876779	0.00901245	0.00925717	0.00950195	0.0097468	0.00999171
						0.163	0.815	0	0.000241899	0.000483852	0.000725859	0.00096792	0.00121004	0.00145221	0.00169443	0.00193672	0.00217905	0.00242145	0.0026639	0.0029064	0.00314897	0.00339159	0.00363427	0.003877	0.0041198	0.00436265	0.00460556	0.00484852	0.00509155	0.00533464	0.00557778	0.00582099	0.00606425	0.00630758	0.00655097	0.00679441	0.00703792	0.00728149	0.00752512	0.00776881	0.00801257	0.00825638	0.00850026	0.0087442	0.00898821	0.00923227	0.00947641	0.0097206	0.00996486
						0.1635	0.8175	0	0.000241246	0.000482546	0.000723901	0.00096531	0.00120677	0.00144829	0.00168987	0.0019315	0.00217318	0.00241493	0.00265672	0.00289858	0.00314049	0.00338246	0.00362449	0.00386657	0.00410871	0.00435091	0.00459317	0.00483549	0.00507787	0.0053203	0.0055628	0.00580535	0.00604797	0.00629065	0.00653338	0.00677618	0.00701904	0.00726196	0.00750494	0.00774798	0.00799108	0.00823425	0.00847748	0.00872077	0.00896413	0.00920755	0.00945103	0.00969458	0.00993819
						0.164	0.82	0	0.000240598	0.00048125	0.000721956	0.000962717	0.00120353	0.0014444	0.00168533	0.00192631	0.00216735	0.00240845	0.0026496	0.00289081	0.00313207	0.00337339	0.00361477	0.00385621	0.00409771	0.00433926	0.00458087	0.00482255	0.00506428	0.00530607	0.00554792	0.00578982	0.00603179	0.00627382	0.00651591	0.00675807	0.00700028	0.00724255	0.00748489	0.00772729	0.00796975	0.00821227	0.00845486	0.0086975	0.00894022	0.00918299	0.00942583	0.00966873	0.0099117
						0.1645	0.8225	0	0.000239954	0.000479961	0.000720024	0.000960141	0.00120031	0.00144054	0.00168082	0.00192116	0.00216156	0.00240201	0.00264252	0.00288308	0.00312371	0.00336439	0.00360512	0.00384592	0.00408677	0.00432768	0.00456866	0.00480968	0.00505077	0.00529192	0.00553313	0.0057744	0.00601573	0.00625712	0.00649856	0.00674008	0.00698165	0.00722328	0.00746498	0.00770673	0.00794855	0.00819044	0.00843238	0.00867439	0.00891646	0.0091586	0.0094008	0.00964306	0.00988539
						0.165	0.825	0	0.000239314	0.000478682	0.000718105	0.000957583	0.00119712	0.0014367	0.00167635	0.00191605	0.0021558	0.00239562	0.00263549	0.00287541	0.0031154	0.00335544	0.00359554	0.0038357	0.00407591	0.00431619	0.00455652	0.00479691	0.00503736	0.00527787	0.00551844	0.00575907	0.00599977	0.00624052	0.00648133	0.0067222	0.00696314	0.00720414	0.0074452	0.00768632	0.0079275	0.00816875	0.00841006	0.00865143	0.00889287	0.00913437	0.00937593	0.00961756	0.00985925
						0.1655	0.8275	0	0.000238678	0.000477411	0.000716198	0.000955041	0.00119394	0.00143289	0.0016719	0.00191097	0.00215009	0.00238927	0.0026285	0.00286779	0.00310714	0.00334655	0.00358602	0.00382554	0.00406512	0.00430476	0.00454446	0.00478422	0.00502404	0.00526392	0.00550385	0.00574385	0.00598391	0.00622403	0.00646421	0.00670445	0.00694476	0.00718512	0.00742555	0.00766604	0.00790659	0.0081472	0.00838788	0.00862862	0.00886943	0.0091103	0.00935123	0.00959223	0.00983329
						0.166	0.83	0	0.000238047	0.000476148	0.000714304	0.000952516	0.00119078	0.00142911	0.00166748	0.00190592	0.00214441	0.00238296	0.00262156	0.00286023	0.00309895	0.00333772	0.00357656	0.00381545	0.0040544	0.00429342	0.00453249	0.00477162	0.0050108	0.00525005	0.00548936	0.00572873	0.00596816	0.00620765	0.0064472	0.00668682	0.00692649	0.00716623	0.00740603	0.00764589	0.00788582	0.0081258	0.00836585	0.00860597	0.00884615	0.00908639	0.00932669	0.00956707	0.0098075
						0.1665	0.8325	0	0.000237419	0.000474894	0.000712423	0.000950007	0.00118765	0.00142534	0.0016631	0.0019009	0.00213877	0.00237669	0.00261467	0.00285271	0.0030908	0.00332895	0.00356716	0.00380543	0.00404376	0.00428214	0.00452059	0.00475909	0.00499766	0.00523628	0.00547497	0.00571371	0.00595252	0.00619138	0.00643031	0.0066693	0.00690835	0.00714747	0.00738664	0.00762588	0.00786518	0.00810454	0.00834397	0.00858346	0.00882302	0.00906264	0.00930232	0.00954207	0.00978188
						0.167	0.835	0	0.000236796	0.000473647	0.000710554	0.000947516	0.00118453	0.00142161	0.00165874	0.00189592	0.00213317	0.00237047	0.00260782	0.00284524	0.00308271	0.00332024	0.00355783	0.00379547	0.00403318	0.00427095	0.00450877	0.00474665	0.0049846	0.0052226	0.00546066	0.00569879	0.00593697	0.00617522	0.00641353	0.0066519	0.00689033	0.00712882	0.00736738	0.007606	0.00784468	0.00808343	0.00832224	0.00856111	0.00880005	0.00903905	0.00927811	0.00951724	0.00975644
						0.1675	0.8375	0	0.000236177	0.000472409	0.000708697	0.00094504	0.00118144	0.00141789	0.00165441	0.00189097	0.0021276	0.00236428	0.00260102	0.00283782	0.00307467	0.00331158	0.00354855	0.00378558	0.00402267	0.00425982	0.00449703	0.0047343	0.00497162	0.00520901	0.00544646	0.00568397	0.00592154	0.00615917	0.00639686	0.00663461	0.00687243	0.00711031	0.00734825	0.00758625	0.00782432	0.00806245	0.00830064	0.0085389	0.00877722	0.00901561	0.00925406	0.00949258	0.00973116
						0.168	0.84	0	0.000235562	0.00047118	0.000706852	0.000942581	0.00117837	0.00141421	0.0016501	0.00188606	0.00212207	0.00235814	0.00259426	0.00283044	0.00306669	0.00330299	0.00353934	0.00377576	0.00401224	0.00424877	0.00448537	0.00472202	0.00495873	0.00519551	0.00543234	0.00566924	0.0059062	0.00614322	0.0063803	0.00661744	0.00685465	0.00709191	0.00732924	0.00756663	0.00780409	0.00804161	0.00827919	0.00851684	0.00875455	0.00899233	0.00923017	0.00946808	0.00970605
						0.1685	0.8425	0	0.000234951	0.000469958	0.00070502	0.000940138	0.00117531	0.00141054	0.00164583	0.00188117	0.00211657	0.00235203	0.00258755	0.00282312	0.00305875	0.00329444	0.00353019	0.003766	0.00400187	0.00423779	0.00447378	0.00470982	0.00494593	0.0051821	0.00541832	0.00565461	0.00589096	0.00612737	0.00636385	0.00660038	0.00683698	0.00707364	0.00731036	0.00754715	0.007784	0.00802091	0.00825789	0.00849493	0.00873203	0.0089692	0.00920644	0.00944374	0.0096811
						0.169	0.845	0	0.000234344	0.000468744	0.000703199	0.00093771	0.00117228	0.0014069	0.00164158	0.00187632	0.00211111	0.00234597	0.00258088	0.00281585	0.00305087	0.00328596	0.0035211	0.0037563	0.00399156	0.00422689	0.00446227	0.00469771	0.00493321	0.00516877	0.0054044	0.00564008	0.00587583	0.00611163	0.0063475	0.00658343	0.00681943	0.00705548	0.0072916	0.00752779	0.00776403	0.00800034	0.00823672	0.00847316	0.00870966	0.00894623	0.00918286	0.00941956	0.00965632
						0.1695	0.8475	0	0.000233741	0.000467538	0.00070139	0.000935299	0.00116926	0.00140329	0.00163736	0.0018715	0.00210569	0.00233994	0.00257425	0.00280862	0.00304304	0.00327753	0.00351207	0.00374667	0.00398133	0.00421605	0.00445083	0.00468567	0.00492057	0.00515554	0.00539056	0.00562564	0.00586079	0.006096	0.00633127	0.0065666	0.00680199	0.00703745	0.00727297	0.00750855	0.0077442	0.00797991	0.00821569	0.00845153	0.00868743	0.0089234	0.00915944	0.00939554	0.0096317
						0.17	0.85	0	0.000233142	0.00046634	0.000699593	0.000932903	0.00116627	0.00139969	0.00163317	0.00186671	0.0021003	0.00233396	0.00256767	0.00280144	0.00303526	0.00326915	0.00350309	0.0037371	0.00397116	0.00420529	0.00443947	0.00467371	0.00490802	0.00514238	0.00537681	0.0056113	0.00584585	0.00608046	0.00631514	0.00654987	0.00678467	0.00701953	0.00725446	0.00748945	0.0077245	0.00795962	0.0081948	0.00843004	0.00866535	0.00890073	0.00913617	0.00937168	0.00960725
						0.1705	0.8525	0	0.000232547	0.000465149	0.000697808	0.000930523	0.00116329	0.00139612	0.00162901	0.00186195	0.00209495	0.00232801	0.00256113	0.0027943	0.00302754	0.00326083	0.00349418	0.00372759	0.00396106	0.00419459	0.00442818	0.00466183	0.00489555	0.00512932	0.00536315	0.00559705	0.00583101	0.00606503	0.00629911	0.00653325	0.00676746	0.00700173	0.00723607	0.00747046	0.00770493	0.00793945	0.00817404	0.0084087	0.00864342	0.0088782	0.00911305	0.00934797	0.00958295
						0.171	0.855	0	0.000231955	0.000463967	0.000696034	0.000928158	0.00116034	0.00139258	0.00162487	0.00185722	0.00208963	0.0023221	0.00255463	0.00278721	0.00301986	0.00325256	0.00348532	0.00371814	0.00395103	0.00418397	0.00441697	0.00465003	0.00488316	0.00511634	0.00534959	0.00558289	0.00581626	0.0060497	0.00628319	0.00651675	0.00675037	0.00698405	0.0072178	0.00745161	0.00768548	0.00791942	0.00815342	0.00838749	0.00862162	0.00885582	0.00909009	0.00932442	0.00955881
						0.1715	0.8575	0	0.000231368	0.000462792	0.000694272	0.000925809	0.0011574	0.00138905	0.00162076	0.00185253	0.00208435	0.00231623	0.00254817	0.00278017	0.00301223	0.00324435	0.00347652	0.00370876	0.00394106	0.00417341	0.00440583	0.00463831	0.00487084	0.00510344	0.00533611	0.00556883	0.00580161	0.00603446	0.00626737	0.00650035	0.00673338	0.00696648	0.00719964	0.00743287	0.00766616	0.00789952	0.00813294	0.00836642	0.00859998	0.00883359	0.00906727	0.00930102	0.00953484
						0.172	0.86	0	0.000230784	0.000461624	0.000692521	0.000923474	0.00115448	0.00138555	0.00161668	0.00184786	0.0020791	0.0023104	0.00254176	0.00277318	0.00300465	0.00323619	0.00346778	0.00369944	0.00393115	0.00416292	0.00439476	0.00462666	0.00485861	0.00509063	0.00532271	0.00555486	0.00578706	0.00601933	0.00625166	0.00648405	0.00671651	0.00694903	0.00718161	0.00741426	0.00764697	0.00787975	0.00811259	0.00834549	0.00857847	0.0088115	0.00904461	0.00927778	0.00951101
						0.1725	0.8625	0	0.000230204	0.000460464	0.000690781	0.000921155	0.00115159	0.00138207	0.00161262	0.00184322	0.00207389	0.00230461	0.00253539	0.00276622	0.00299712	0.00322808	0.00345909	0.00369017	0.00392131	0.00415251	0.00438376	0.00461508	0.00484646	0.0050779	0.00530941	0.00554097	0.0057726	0.00600429	0.00623605	0.00646786	0.00669974	0.00693169	0.00716369	0.00739577	0.0076279	0.0078601	0.00809237	0.0083247	0.0085571	0.00878956	0.00902209	0.00925468	0.00948734
						0.173	0.865	0	0.000229628	0.000459312	0.000689053	0.000918851	0.00114871	0.00137862	0.00160859	0.00183862	0.0020687	0.00229885	0.00252905	0.00275932	0.00298964	0.00322002	0.00345046	0.00368097	0.00391153	0.00414215	0.00437284	0.00460358	0.00483439	0.00506526	0.00529619	0.00552718	0.00575824	0.00598935	0.00622053	0.00645178	0.00668309	0.00691446	0.00714589	0.00737739	0.00760896	0.00784059	0.00807228	0.00830404	0.00853587	0.00876776	0.00899972	0.00923174	0.00946383
						0.1735	0.8675	0	0.000229055	0.000458167	0.000687335	0.000916561	0.00114584	0.00137519	0.00160458	0.00183404	0.00206356	0.00229313	0.00252276	0.00275246	0.00298221	0.00321202	0.00344189	0.00367182	0.00390181	0.00413187	0.00436198	0.00459216	0.00482239	0.00505269	0.00528305	0.00551348	0.00574396	0.00597451	0.00620512	0.0064358	0.00666654	0.00689734	0.00712821	0.00735914	0.00759014	0.0078212	0.00805232	0.00828352	0.00851477	0.0087461	0.00897749	0.00920895	0.00944047
						0.174	0.87	0	0.000228486	0.000457029	0.000685629	0.000914286	0.001143	0.00137177	0.0016006	0.00182949	0.00205844	0.00228745	0.00251651	0.00274564	0.00297482	0.00320407	0.00343337	0.00366274	0.00389216	0.00412165	0.0043512	0.0045808	0.00481048	0.00504021	0.00527	0.00549986	0.00572978	0.00595976	0.00618981	0.00641992	0.0066501	0.00688033	0.00711064	0.007341	0.00757143	0.00780193	0.00803249	0.00826312	0.00849382	0.00872458	0.0089554	0.0091863	0.00941726
						0.1745	0.8725	0	0.000227921	0.000455898	0.000683933	0.000912026	0.00114018	0.00136838	0.00159665	0.00182497	0.00205336	0.0022818	0.0025103	0.00273886	0.00296748	0.00319616	0.00342491	0.00365371	0.00388257	0.00411149	0.00434048	0.00456953	0.00479863	0.0050278	0.00525704	0.00548633	0.00571569	0.00594511	0.0061746	0.00640415	0.00663376	0.00686344	0.00709318	0.00732298	0.00755285	0.00778279	0.00801279	0.00824286	0.008473	0.0087032	0.00893346	0.0091638	0.0093942
						0.175	0.875	0	0.000227359	0.000454775	0.000682249	0.00090978	0.00113737	0.00136502	0.00159272	0.00182048	0.00204831	0.00227619	0.00250413	0.00273213	0.00296019	0.00318831	0.0034165	0.00364474	0.00387304	0.0041014	0.00432983	0.00455832	0.00478687	0.00501548	0.00524415	0.00547289	0.00570169	0.00593055	0.00615948	0.00638847	0.00661753	0.00684665	0.00707583	0.00730508	0.00753439	0.00776377	0.00799322	0.00822273	0.00845231	0.00868195	0.00891166	0.00914144	0.00937129
						0.1755	0.8775	0	0.000226801	0.000453659	0.000680575	0.000907548	0.00113458	0.00136167	0.00158882	0.00181602	0.00204329	0.00227061	0.002498	0.00272544	0.00295295	0.00318051	0.00340814	0.00363582	0.00386357	0.00409138	0.00431925	0.00454718	0.00477518	0.00500323	0.00523135	0.00545954	0.00568778	0.00591609	0.00614446	0.0063729	0.0066014	0.00682997	0.0070586	0.00728729	0.00751605	0.00774488	0.00797377	0.00820273	0.00843175	0.00866084	0.00889	0.00911923	0.00934852
						0.176	0.88	0	0.000226246	0.00045255	0.000678911	0.000905331	0.00113181	0.00135834	0.00158494	0.00181159	0.0020383	0.00226508	0.00249191	0.0027188	0.00294575	0.00317276	0.00339983	0.00362697	0.00385416	0.00408142	0.00430874	0.00453612	0.00476356	0.00499107	0.00521863	0.00544627	0.00567396	0.00590172	0.00612954	0.00635743	0.00658538	0.00681339	0.00704147	0.00726962	0.00749783	0.0077261	0.00795445	0.00818286	0.00841133	0.00863987	0.00886848	0.00909716	0.0093259
						0.1765	0.8825	0	0.000225695	0.000451448	0.000677259	0.000903127	0.00112905	0.00135504	0.00158108	0.00180719	0.00203335	0.00225957	0.00248585	0.0027122	0.0029386	0.00316506	0.00339158	0.00361817	0.00384482	0.00407152	0.00429829	0.00452513	0.00475202	0.00497898	0.005206	0.00543308	0.00566023	0.00588744	0.00611471	0.00634205	0.00656946	0.00679692	0.00702446	0.00725206	0.00747972	0.00770745	0.00793525	0.00816311	0.00839104	0.00861904	0.0088471	0.00907523	0.00930343
						0.177	0.885	0	0.000225148	0.000450353	0.000675616	0.000900938	0.00112632	0.00135176	0.00157725	0.00180281	0.00202843	0.0022541	0.00247984	0.00270563	0.00293149	0.00315741	0.00338339	0.00360943	0.00383553	0.00406169	0.00428791	0.0045142	0.00474055	0.00496696	0.00519344	0.00541998	0.00564658	0.00587325	0.00609998	0.00632677	0.00655364	0.00678056	0.00700755	0.00723461	0.00746173	0.00768892	0.00791617	0.00814349	0.00837088	0.00859833	0.00882585	0.00905344	0.0092811
						0.1775	0.8875	0	0.000224604	0.000449265	0.000673984	0.000898762	0.0011236	0.00134849	0.00157345	0.00179846	0.00202353	0.00224867	0.00247386	0.00269911	0.00292443	0.0031498	0.00337524	0.00360074	0.0038263	0.00405192	0.0042776	0.00450335	0.00472916	0.00495503	0.00518096	0.00540696	0.00563302	0.00585915	0.00608534	0.0063116	0.00653792	0.0067643	0.00699075	0.00721727	0.00744385	0.0076705	0.00789721	0.008124	0.00835084	0.00857776	0.00880474	0.00903179	0.00925891
						0.178	0.89	0	0.000224063	0.000448184	0.000672363	0.0008966	0.0011209	0.00134525	0.00156967	0.00179414	0.00201867	0.00224327	0.00246792	0.00269264	0.00291741	0.00314225	0.00336714	0.0035921	0.00381712	0.00404221	0.00426735	0.00449256	0.00471783	0.00494317	0.00516856	0.00539403	0.00561955	0.00584514	0.00607079	0.00629651	0.0065223	0.00674815	0.00697406	0.00720004	0.00742609	0.0076522	0.00787838	0.00810462	0.00833094	0.00855732	0.00878377	0.00901028	0.00923687
						0.1785	0.8925	0	0.000223526	0.000447109	0.000670751	0.000894452	0.00111821	0.00134203	0.00156591	0.00178985	0.00201384	0.0022379	0.00246202	0.0026862	0.00291044	0.00313474	0.0033591	0.00358353	0.00380801	0.00403256	0.00425717	0.00448184	0.00470658	0.00493138	0.00515624	0.00538117	0.00560616	0.00583122	0.00605634	0.00628153	0.00650678	0.00673209	0.00695747	0.00718292	0.00740844	0.00763402	0.00785966	0.00808538	0.00831116	0.00853701	0.00876292	0.00898891	0.00921496
						0.179	0.895	0	0.000222992	0.000446042	0.00066915	0.000892317	0.00111554	0.00133883	0.00156217	0.00178558	0.00200904	0.00223257	0.00245615	0.0026798	0.00290351	0.00312728	0.00335111	0.003575	0.00379896	0.00402297	0.00424705	0.00447119	0.0046954	0.00491967	0.005144	0.0053684	0.00559286	0.00581739	0.00604198	0.00626663	0.00649135	0.00671614	0.00694099	0.00716591	0.0073909	0.00761595	0.00784107	0.00806625	0.00829151	0.00851683	0.00874221	0.00896767	0.0091932
						0.1795	0.8975	0	0.000222461	0.000444981	0.000667559	0.000890196	0.00111289	0.00133565	0.00155846	0.00178134	0.00200427	0.00222727	0.00245033	0.00267344	0.00289662	0.00311986	0.00334317	0.00356653	0.00378996	0.00401345	0.004237	0.00446061	0.00468429	0.00490803	0.00513184	0.00535571	0.00557964	0.00580364	0.00602771	0.00625183	0.00647603	0.00670029	0.00692462	0.00714901	0.00737347	0.00759799	0.00782259	0.00804725	0.00827198	0.00849677	0.00872164	0.00894657	0.00917157
						0.18	0.9	0	0.000221934	0.000443926	0.000665977	0.000888088	0.00111026	0.00133249	0.00155478	0.00177712	0.00199953	0.002222	0.00244453	0.00266713	0.00288978	0.0031125	0.00333527	0.00355811	0.00378101	0.00400398	0.00422701	0.0044501	0.00467325	0.00489647	0.00511975	0.0053431	0.00556651	0.00578998	0.00601352	0.00623713	0.0064608	0.00668454	0.00690834	0.00713221	0.00735615	0.00758015	0.00780422	0.00802836	0.00825257	0.00847684	0.00870119	0.0089256	0.00915008
						0.1805	0.9025	0	0.00022141	0.000442878	0.000664406	0.000885993	0.00110764	0.00132934	0.00155111	0.00177294	0.00199482	0.00221677	0.00243878	0.00266085	0.00288298	0.00310517	0.00332743	0.00354975	0.00377213	0.00399457	0.00421708	0.00443965	0.00466228	0.00488498	0.00510774	0.00533056	0.00555345	0.00577641	0.00599943	0.00622252	0.00644567	0.00666889	0.00689217	0.00711552	0.00733894	0.00756243	0.00778598	0.0080096	0.00823329	0.00845704	0.00868087	0.00890476	0.00912872
						0.181	0.905	0	0.000220889	0.000441837	0.000662844	0.000883911	0.00110504	0.00132622	0.00154747	0.00176878	0.00199014	0.00221157	0.00243306	0.00265461	0.00287622	0.0030979	0.00331964	0.00354143	0.0037633	0.00398522	0.00420721	0.00442926	0.00465138	0.00487356	0.0050958	0.00531811	0.00554048	0.00576292	0.00598543	0.006208	0.00643063	0.00665333	0.0068761	0.00709894	0.00732184	0.00754481	0.00776785	0.00799095	0.00821412	0.00843737	0.00866068	0.00888405	0.0091075
						0.1815	0.9075	0	0.000220372	0.000440802	0.000661292	0.000881842	0.00110245	0.00132312	0.00154385	0.00176464	0.00198549	0.0022064	0.00242738	0.00264841	0.00286951	0.00309067	0.00331189	0.00353317	0.00375452	0.00397593	0.00419741	0.00441894	0.00464054	0.00486221	0.00508394	0.00530573	0.00552759	0.00574952	0.00597151	0.00619357	0.00641569	0.00663788	0.00686013	0.00708246	0.00730485	0.0075273	0.00774983	0.00797242	0.00819508	0.00841781	0.00864061	0.00886348	0.00908642
						0.182	0.91	0	0.000219857	0.000439774	0.00065975	0.000879786	0.00109988	0.00132004	0.00154025	0.00176053	0.00198087	0.00220127	0.00242173	0.00264225	0.00286284	0.00308348	0.00330419	0.00352497	0.0037458	0.0039667	0.00418766	0.00440869	0.00462978	0.00485093	0.00507215	0.00529344	0.00551479	0.0057362	0.00595768	0.00617923	0.00640084	0.00662252	0.00684427	0.00706608	0.00728796	0.00750991	0.00773192	0.00795401	0.00817616	0.00839838	0.00862067	0.00884303	0.00906546
						0.1825	0.9125	0	0.000219346	0.000438752	0.000658217	0.000877743	0.00109733	0.00131697	0.00153668	0.00175645	0.00197628	0.00219616	0.00241612	0.00263613	0.00285621	0.00307634	0.00329654	0.00351681	0.00373713	0.00395752	0.00417798	0.0043985	0.00461908	0.00483973	0.00506044	0.00528121	0.00550206	0.00572296	0.00594394	0.00616498	0.00638608	0.00660726	0.0068285	0.0070498	0.00727118	0.00749262	0.00771413	0.00793571	0.00815736	0.00837907	0.00860086	0.00882271	0.00904464
						0.183	0.915	0	0.000218839	0.000437737	0.000656694	0.000875712	0.00109479	0.00131393	0.00153313	0.00175239	0.00197171	0.00219109	0.00241054	0.00263005	0.00284961	0.00306925	0.00328894	0.0035087	0.00372852	0.00394841	0.00416836	0.00438837	0.00460845	0.00482859	0.0050488	0.00526907	0.00548941	0.00570981	0.00593028	0.00615082	0.00637142	0.00659209	0.00681283	0.00703363	0.0072545	0.00747544	0.00769645	0.00791753	0.00813867	0.00835989	0.00858117	0.00880252	0.00902394
						0.1835	0.9175	0	0.000218334	0.000436727	0.000655181	0.000873694	0.00109227	0.0013109	0.0015296	0.00174835	0.00196717	0.00218605	0.00240499	0.002624	0.00284307	0.00306219	0.00328139	0.00350064	0.00371996	0.00393935	0.00415879	0.0043783	0.00459788	0.00481752	0.00503723	0.005257	0.00547684	0.00569674	0.00591671	0.00613674	0.00635685	0.00657702	0.00679725	0.00701756	0.00723793	0.00745837	0.00767888	0.00789946	0.0081201	0.00834082	0.0085616	0.00878246	0.00900338
						0.184	0.92	0	0.000217832	0.000435724	0.000653676	0.000871688	0.00108976	0.0013079	0.00152609	0.00174435	0.00196266	0.00218104	0.00239949	0.00261799	0.00283656	0.00305519	0.00327388	0.00349264	0.00371146	0.00393034	0.00414929	0.0043683	0.00458738	0.00480652	0.00502573	0.005245	0.00546434	0.00568375	0.00590322	0.00612276	0.00634236	0.00656204	0.00678178	0.00700158	0.00722146	0.0074414	0.00766142	0.0078815	0.00810165	0.00832187	0.00854216	0.00876252	0.00898295
						0.1845	0.9225	0	0.000217334	0.000434727	0.000652181	0.000869695	0.00108727	0.00130491	0.0015226	0.00174036	0.00195818	0.00217607	0.00239401	0.00261202	0.00283009	0.00304822	0.00326642	0.00348468	0.003703	0.00392139	0.00413984	0.00435836	0.00457694	0.00479559	0.0050143	0.00523308	0.00545193	0.00567084	0.00588982	0.00610886	0.00632797	0.00654715	0.0067664	0.00698571	0.00720509	0.00742454	0.00764406	0.00786365	0.00808331	0.00830304	0.00852283	0.0087427	0.00896264
						0.185	0.925	0	0.000216838	0.000433736	0.000650695	0.000867714	0.00108479	0.00130194	0.00151914	0.0017364	0.00195373	0.00217112	0.00238857	0.00260608	0.00282366	0.0030413	0.003259	0.00347677	0.0036946	0.0039125	0.00413046	0.00434848	0.00456657	0.00478473	0.00500295	0.00522124	0.00543959	0.00565801	0.00587649	0.00609505	0.00631367	0.00653236	0.00675111	0.00696994	0.00718883	0.00740779	0.00762682	0.00784592	0.00806508	0.00828432	0.00850363	0.00872301	0.00894246
						0.1855	0.9275	0	0.000216346	0.000432752	0.000649218	0.000865745	0.00108233	0.00129898	0.00151569	0.00173247	0.0019493	0.0021662	0.00238316	0.00260018	0.00281727	0.00303442	0.00325163	0.00346891	0.00368625	0.00390366	0.00412113	0.00433866	0.00455626	0.00477393	0.00499166	0.00520946	0.00542733	0.00564526	0.00586326	0.00608132	0.00629945	0.00651765	0.00673592	0.00695426	0.00717266	0.00739114	0.00760968	0.00782829	0.00804697	0.00826572	0.00848454	0.00870344	0.0089224
						0.186	0.93	0	0.000215856	0.000431773	0.00064775	0.000863788	0.00107989	0.00129605	0.00151227	0.00172856	0.0019449	0.00216131	0.00237779	0.00259432	0.00281092	0.00302758	0.00324431	0.0034611	0.00367795	0.00389487	0.00411186	0.00432891	0.00454602	0.0047632	0.00498045	0.00519776	0.00541514	0.00563258	0.0058501	0.00606768	0.00628533	0.00650304	0.00672082	0.00693868	0.0071566	0.00737459	0.00759265	0.00781077	0.00802897	0.00824724	0.00846558	0.00868399	0.00890247
						0.1865	0.9325	0	0.00021537	0.0004308	0.000646291	0.000861844	0.00107746	0.00129313	0.00150887	0.00172467	0.00194053	0.00215646	0.00237244	0.00258849	0.00280461	0.00302079	0.00323703	0.00345333	0.00366971	0.00388614	0.00410264	0.00431921	0.00453584	0.00475254	0.0049693	0.00518613	0.00540303	0.00561999	0.00583702	0.00605412	0.00627129	0.00648852	0.00670582	0.00692319	0.00714063	0.00735814	0.00757572	0.00779337	0.00801108	0.00822887	0.00844673	0.00866466	0.00888266
						0.187	0.935	0	0.000214886	0.000429833	0.000644841	0.000859911	0.00107504	0.00129023	0.00150549	0.00172081	0.00193619	0.00215163	0.00236713	0.0025827	0.00279834	0.00301403	0.00322979	0.00344562	0.00366151	0.00387746	0.00409348	0.00430957	0.00452572	0.00474194	0.00495822	0.00517457	0.00539099	0.00560747	0.00582402	0.00604064	0.00625733	0.00647409	0.00669091	0.0069078	0.00712476	0.00734179	0.00755889	0.00777606	0.0079933	0.00821061	0.00842799	0.00864545	0.00886297
						0.1875	0.9375	0	0.000214406	0.000428872	0.0006434	0.000857989	0.00107264	0.00128735	0.00150213	0.00171697	0.00193187	0.00214683	0.00236186	0.00257695	0.0027921	0.00300732	0.0032226	0.00343795	0.00365336	0.00386884	0.00408438	0.00429999	0.00451566	0.0047314	0.00494721	0.00516308	0.00537903	0.00559503	0.00581111	0.00602725	0.00624346	0.00645974	0.00667609	0.00689251	0.00710899	0.00732555	0.00754217	0.00775887	0.00797563	0.00819247	0.00840938	0.00862635	0.0088434
						0.188	0.94	0	0.000213928	0.000427917	0.000641968	0.00085608	0.00107025	0.00128449	0.00149879	0.00171315	0.00192757	0.00214206	0.00235661	0.00257123	0.00278591	0.00300065	0.00321546	0.00343033	0.00364526	0.00386027	0.00407534	0.00429047	0.00450567	0.00472093	0.00493627	0.00515167	0.00536713	0.00558267	0.00579827	0.00601394	0.00622968	0.00644549	0.00666136	0.00687731	0.00709332	0.0073094	0.00752556	0.00774178	0.00795807	0.00817444	0.00839087	0.00860738	0.00882396
						0.1885	0.9425	0	0.000213453	0.000426968	0.000640544	0.000854182	0.00106788	0.00128164	0.00149547	0.00170936	0.00192331	0.00213732	0.0023514	0.00256554	0.00277975	0.00299402	0.00320835	0.00342275	0.00363722	0.00385175	0.00406634	0.00428101	0.00449573	0.00471053	0.00492539	0.00514032	0.00535532	0.00557038	0.00578551	0.00600071	0.00621598	0.00643132	0.00664672	0.0068622	0.00707774	0.00729336	0.00750904	0.00772479	0.00794062	0.00815651	0.00837248	0.00858852	0.00880463
						0.189	0.945	0	0.000212981	0.000426024	0.000639129	0.000852296	0.00106552	0.00127882	0.00149217	0.00170559	0.00191907	0.00213261	0.00234622	0.00255989	0.00277363	0.00298743	0.00320129	0.00341522	0.00362922	0.00384328	0.00405741	0.0042716	0.00448586	0.00470019	0.00491458	0.00512904	0.00534357	0.00555817	0.00577283	0.00598756	0.00620236	0.00641723	0.00663217	0.00684718	0.00706226	0.00727741	0.00749262	0.00770791	0.00792327	0.0081387	0.0083542	0.00856978	0.00878542
						0.1895	0.9475	0	0.000212512	0.000425087	0.000637722	0.000850421	0.00106318	0.001276	0.00148889	0.00170184	0.00191485	0.00212793	0.00234107	0.00255427	0.00276754	0.00298088	0.00319427	0.00340774	0.00362127	0.00383486	0.00404852	0.00426225	0.00447605	0.00468991	0.00490384	0.00511783	0.0053319	0.00554603	0.00576023	0.00597449	0.00618883	0.00640324	0.00661771	0.00683226	0.00704687	0.00726155	0.00747631	0.00769113	0.00790603	0.008121	0.00833604	0.00855115	0.00876633
						0.19	0.95	0	0.000212046	0.000424154	0.000636324	0.000848557	0.00106085	0.00127321	0.00148563	0.00169811	0.00191066	0.00212327	0.00233595	0.00254869	0.00276149	0.00297436	0.0031873	0.0034003	0.00361337	0.0038265	0.0040397	0.00425296	0.00446629	0.00467969	0.00489316	0.00510669	0.00532029	0.00553396	0.0057477	0.0059615	0.00617538	0.00638932	0.00660334	0.00681742	0.00703158	0.0072458	0.00746009	0.00767446	0.00788889	0.0081034	0.00831798	0.00853263	0.00874736
						0.1905	0.9525	0	0.000211583	0.000423228	0.000634935	0.000846704	0.00105854	0.00127043	0.00148239	0.00169441	0.0019065	0.00211865	0.00233086	0.00254314	0.00275548	0.00296789	0.00318037	0.00339291	0.00360551	0.00381818	0.00403092	0.00424373	0.0044566	0.00466954	0.00488254	0.00509562	0.00530876	0.00552197	0.00573525	0.00594859	0.00616201	0.0063755	0.00658905	0.00680268	0.00701637	0.00723014	0.00744398	0.00765788	0.00787186	0.00808591	0.00830004	0.00851423	0.0087285
						0.191	0.955	0	0.000211122	0.000422307	0.000633554	0.000844863	0.00105624	0.00126767	0.00147917	0.00169073	0.00190236	0.00211405	0.0023258	0.00253762	0.00274951	0.00296146	0.00317348	0.00338556	0.0035977	0.00380992	0.0040222	0.00423455	0.00444696	0.00465944	0.00487199	0.00508461	0.00529729	0.00551005	0.00572287	0.00593576	0.00614872	0.00636175	0.00657485	0.00678802	0.00700126	0.00721457	0.00742796	0.00764141	0.00785493	0.00806853	0.0082822	0.00849594	0.00870975
						0.1915	0.9575	0	0.000210664	0.000421391	0.000632181	0.000843033	0.00105395	0.00126493	0.00147597	0.00168707	0.00189824	0.00210948	0.00232078	0.00253214	0.00274357	0.00295507	0.00316663	0.00337825	0.00358994	0.0038017	0.00401353	0.00422542	0.00443738	0.00464941	0.0048615	0.00507367	0.0052859	0.0054982	0.00571057	0.00592301	0.00613551	0.00634809	0.00656074	0.00677346	0.00698625	0.0071991	0.00741203	0.00762504	0.00783811	0.00805125	0.00826447	0.00847776	0.00869112
						0.192	0.96	0	0.000210209	0.000420481	0.000630816	0.000841213	0.00105167	0.0012622	0.00147279	0.00168344	0.00189415	0.00210494	0.00231578	0.00252669	0.00273767	0.00294871	0.00315982	0.00337099	0.00358223	0.00379354	0.00400491	0.00421635	0.00442786	0.00463944	0.00485108	0.00506279	0.00527457	0.00548642	0.00569834	0.00591033	0.00612239	0.00633451	0.00654671	0.00675898	0.00697132	0.00718373	0.00739621	0.00760876	0.00782138	0.00803408	0.00824685	0.00845969	0.0086726
						0.1925	0.9625	0	0.000209757	0.000419577	0.000629459	0.000839405	0.00104941	0.00125949	0.00146962	0.00167982	0.00189009	0.00210042	0.00231081	0.00252127	0.0027318	0.00294239	0.00315305	0.00336377	0.00357456	0.00378542	0.00399635	0.00420734	0.0044184	0.00462952	0.00484072	0.00505198	0.00526332	0.00547472	0.00568619	0.00589773	0.00610934	0.00632102	0.00653277	0.00674459	0.00695648	0.00716844	0.00738048	0.00759258	0.00780476	0.00801701	0.00822933	0.00844173	0.0086542
						0.193	0.965	0	0.000209307	0.000418677	0.000628111	0.000837607	0.00104717	0.00125679	0.00146648	0.00167623	0.00188605	0.00209593	0.00230588	0.00251589	0.00272597	0.00293611	0.00314632	0.0033566	0.00356694	0.00377735	0.00398783	0.00419838	0.00440899	0.00461967	0.00483042	0.00504124	0.00525212	0.00546308	0.00567411	0.0058852	0.00609637	0.0063076	0.00651891	0.00673028	0.00694173	0.00715325	0.00736484	0.0075765	0.00778824	0.00800004	0.00821192	0.00842388	0.0086359
						0.1935	0.9675	0	0.00020886	0.000417784	0.00062677	0.00083582	0.00104493	0.00125411	0.00146335	0.00167266	0.00188203	0.00209147	0.00230097	0.00251054	0.00272017	0.00292987	0.00313964	0.00334947	0.00355937	0.00376933	0.00397937	0.00418947	0.00439964	0.00460988	0.00482018	0.00503056	0.005241	0.00545152	0.0056621	0.00587275	0.00608347	0.00629427	0.00650513	0.00671607	0.00692707	0.00713815	0.0073493	0.00756052	0.00777181	0.00798318	0.00819462	0.00840613	0.00861772
						0.194	0.97	0	0.000208416	0.000416895	0.000625438	0.000834044	0.00104271	0.00125145	0.00146025	0.00166911	0.00187804	0.00208703	0.00229609	0.00250522	0.00271441	0.00292366	0.00313299	0.00334238	0.00355184	0.00376136	0.00397095	0.00418061	0.00439034	0.00460014	0.00481001	0.00501994	0.00522994	0.00544002	0.00565016	0.00586037	0.00607066	0.00628101	0.00649144	0.00670193	0.0069125	0.00712314	0.00733385	0.00754463	0.00775549	0.00796642	0.00817742	0.00838849	0.00859964
						0.1945	0.9725	0	0.000207974	0.000416012	0.000624113	0.000832278	0.00104051	0.0012488	0.00145716	0.00166558	0.00187407	0.00208262	0.00229124	0.00249993	0.00270868	0.0029175	0.00312638	0.00333533	0.00354435	0.00375344	0.00396259	0.00417181	0.0043811	0.00459046	0.00479989	0.00500939	0.00521895	0.00542859	0.0056383	0.00584807	0.00605792	0.00626784	0.00647782	0.00668788	0.00689802	0.00710822	0.00731849	0.00752884	0.00773926	0.00794975	0.00816032	0.00837096	0.00858167
						0.195	0.975	0	0.000207535	0.000415134	0.000622796	0.000830523	0.00103831	0.00124617	0.00145409	0.00166207	0.00187012	0.00207824	0.00228642	0.00249467	0.00270298	0.00291136	0.00311981	0.00332833	0.00353691	0.00374556	0.00395428	0.00416306	0.00437192	0.00458084	0.00478984	0.0049989	0.00520803	0.00541723	0.0056265	0.00583584	0.00604526	0.00625474	0.00646429	0.00667392	0.00688362	0.00709339	0.00730323	0.00751314	0.00772313	0.00793319	0.00814333	0.00835353	0.00856381
						0.1955	0.9775	0	0.000207099	0.000414261	0.000621487	0.000828778	0.00103613	0.00124355	0.00145104	0.00165859	0.0018662	0.00207388	0.00228163	0.00248944	0.00269732	0.00290527	0.00311328	0.00332136	0.00352951	0.00373773	0.00394601	0.00415437	0.00436279	0.00457128	0.00477984	0.00498847	0.00519717	0.00540594	0.00561478	0.00582369	0.00603267	0.00624172	0.00645084	0.00666004	0.00686931	0.00707864	0.00728806	0.00749754	0.0077071	0.00791673	0.00812643	0.00833621	0.00854606
						0.196	0.98	0	0.000206665	0.000413393	0.000620186	0.000827043	0.00103396	0.00124095	0.001448	0.00165512	0.0018623	0.00206955	0.00227687	0.00248425	0.0026917	0.00289921	0.00310679	0.00331444	0.00352216	0.00372995	0.0039378	0.00414572	0.00435371	0.00456177	0.0047699	0.0049781	0.00518637	0.00539471	0.00560312	0.0058116	0.00602016	0.00622878	0.00643747	0.00664624	0.00685508	0.00706399	0.00727297	0.00748203	0.00769116	0.00790036	0.00810964	0.00831899	0.00852841
						0.1965	0.9825	0	0.000206233	0.000412531	0.000618892	0.000825318	0.00103181	0.00123837	0.00144499	0.00165167	0.00185843	0.00206525	0.00227213	0.00247908	0.0026861	0.00289319	0.00310034	0.00330756	0.00351485	0.00372221	0.00392963	0.00413713	0.00434469	0.00455232	0.00476003	0.0049678	0.00517564	0.00538355	0.00559154	0.00579959	0.00600772	0.00621591	0.00642418	0.00663252	0.00684094	0.00704942	0.00725798	0.00746661	0.00767532	0.00788409	0.00809295	0.00830187	0.00851087
						0.197	0.985	0	0.000205804	0.000411673	0.000617606	0.000823604	0.00102967	0.00123579	0.00144199	0.00164825	0.00185457	0.00206096	0.00226742	0.00247395	0.00268054	0.0028872	0.00309393	0.00330072	0.00350758	0.00371452	0.00392152	0.00412858	0.00433572	0.00454293	0.00475021	0.00495756	0.00516497	0.00537246	0.00558002	0.00578765	0.00599535	0.00620313	0.00641097	0.00661889	0.00682688	0.00703494	0.00724307	0.00745128	0.00765957	0.00786792	0.00807635	0.00828486	0.00849343
						0.1975	0.9875	0	0.000205378	0.000410821	0.000616328	0.0008219	0.00102754	0.00123324	0.00143901	0.00164484	0.00185074	0.00205671	0.00226274	0.00246884	0.00267501	0.00288125	0.00308755	0.00329392	0.00350036	0.00370687	0.00391345	0.00412009	0.00432681	0.00453359	0.00474045	0.00494737	0.00515437	0.00536143	0.00556857	0.00577578	0.00598306	0.00619041	0.00639784	0.00660533	0.0068129	0.00702054	0.00722826	0.00743605	0.00764391	0.00785185	0.00805986	0.00826794	0.0084761
						0.198	0.99	0	0.000204954	0.000409973	0.000615057	0.000820205	0.00102542	0.0012307	0.00143604	0.00164146	0.00184693	0.00205248	0.00225809	0.00246377	0.00266951	0.00287533	0.00308121	0.00328716	0.00349318	0.00369927	0.00390542	0.00411165	0.00431794	0.00452431	0.00473074	0.00493725	0.00514382	0.00535047	0.00555719	0.00576398	0.00597084	0.00617777	0.00638478	0.00659186	0.00679901	0.00700623	0.00721353	0.0074209	0.00762835	0.00783586	0.00804346	0.00825113	0.00845887
						0.1985	0.9925	0	0.000204533	0.000409131	0.000613793	0.000818521	0.00102331	0.00122817	0.0014331	0.00163809	0.00184315	0.00204827	0.00225346	0.00245872	0.00266405	0.00286945	0.00307491	0.00328044	0.00348604	0.00369171	0.00389745	0.00410325	0.00430913	0.00451508	0.0047211	0.00492719	0.00513334	0.00533957	0.00554588	0.00575225	0.00595869	0.00616521	0.0063718	0.00657846	0.0067852	0.00699201	0.00719889	0.00740584	0.00761287	0.00781998	0.00802716	0.00823441	0.00844174
						0.199	0.995	0	0.000204114	0.000408293	0.000612537	0.000816846	0.00102122	0.00122566	0.00143017	0.00163474	0.00183938	0.00204409	0.00224887	0.00245371	0.00265862	0.0028636	0.00306864	0.00327376	0.00347894	0.0036842	0.00388952	0.00409491	0.00430037	0.0045059	0.00471151	0.00491718	0.00512292	0.00532874	0.00553463	0.00574059	0.00594662	0.00615272	0.0063589	0.00656515	0.00677147	0.00697786	0.00718433	0.00739088	0.00759749	0.00780419	0.00801095	0.00821779	0.00842471
						0.1995	0.9975	0	0.000203698	0.00040746	0.000611288	0.000815182	0.00101914	0.00122317	0.00142726	0.00163142	0.00183564	0.00203994	0.0022443	0.00244872	0.00265322	0.00285778	0.00306242	0.00326712	0.00347189	0.00367673	0.00388164	0.00408661	0.00429166	0.00449678	0.00470197	0.00490723	0.00511257	0.00531797	0.00552345	0.00572899	0.00593461	0.0061403	0.00634607	0.00655191	0.00675782	0.0069638	0.00716986	0.007376	0.0075822	0.00778849	0.00799484	0.00820127	0.00840778
						0.2	1	0	0.000203283	0.000406632	0.000610046	0.000813526	0.00101707	0.00122068	0.00142436	0.00162811	0.00183192	0.0020358	0.00223975	0.00244377	0.00264785	0.002852	0.00305622	0.00326051	0.00346487	0.0036693	0.0038738	0.00407837	0.00428301	0.00448772	0.0046925	0.00489735	0.00510227	0.00530726	0.00551233	0.00571747	0.00592268	0.00612796	0.00633332	0.00653875	0.00674425	0.00694983	0.00715548	0.0073612	0.007567	0.00777288	0.00797883	0.00818485	0.00839095
						0.2005	1.0025	0	0.000202872	0.000405809	0.000608812	0.000811881	0.00101502	0.00121822	0.00142149	0.00162482	0.00182822	0.00203169	0.00223523	0.00243884	0.00264251	0.00284626	0.00305007	0.00325395	0.0034579	0.00366192	0.00386601	0.00407017	0.0042744	0.0044787	0.00468307	0.00488752	0.00509203	0.00529662	0.00550128	0.00570601	0.00591081	0.00611569	0.00632064	0.00652566	0.00673076	0.00693593	0.00714118	0.0073465	0.00755189	0.00775736	0.00796291	0.00816853	0.00837422
						0.201	1.005	0	0.000202463	0.000404991	0.000607585	0.000810245	0.00101297	0.00121576	0.00141862	0.00162155	0.00182455	0.00202761	0.00223074	0.00243394	0.00263721	0.00284054	0.00304395	0.00324742	0.00345097	0.00365458	0.00385826	0.00406202	0.00426584	0.00446974	0.00467371	0.00487774	0.00508185	0.00528604	0.00549029	0.00569462	0.00589902	0.00610349	0.00630804	0.00651266	0.00671735	0.00692212	0.00712696	0.00733188	0.00753687	0.00774194	0.00794708	0.0081523	0.00835759
						0.2015	1.0075	0	0.000202056	0.000404177	0.000606364	0.000808618	0.00101094	0.00121333	0.00141578	0.0016183	0.00182089	0.00202355	0.00222627	0.00242907	0.00263193	0.00283486	0.00303786	0.00324093	0.00344407	0.00364728	0.00385056	0.00405391	0.00425734	0.00446083	0.00466439	0.00486803	0.00507174	0.00527551	0.00547937	0.00568329	0.00588729	0.00609136	0.00629551	0.00649972	0.00670402	0.00690838	0.00711283	0.00731734	0.00752193	0.0077266	0.00793134	0.00813616	0.00834106
						0.202	1.01	0	0.000201651	0.000403368	0.000605151	0.000807001	0.00100892	0.0012109	0.00141295	0.00161507	0.00181726	0.00201951	0.00222183	0.00242422	0.00262668	0.00282921	0.00303181	0.00323448	0.00343722	0.00364003	0.00384291	0.00404586	0.00424888	0.00445197	0.00465513	0.00485837	0.00506168	0.00526506	0.00546851	0.00567203	0.00587563	0.0060793	0.00628305	0.00648687	0.00669076	0.00689473	0.00709877	0.00730289	0.00750708	0.00771135	0.0079157	0.00812012	0.00832462
						0.2025	1.0125	0	0.000201249	0.000402564	0.000603945	0.000805393	0.00100691	0.00120849	0.00141014	0.00161186	0.00181364	0.0020155	0.00221742	0.00241941	0.00262147	0.0028236	0.0030258	0.00322807	0.00343041	0.00363282	0.0038353	0.00403785	0.00424047	0.00444316	0.00464593	0.00484876	0.00505167	0.00525466	0.00545771	0.00566084	0.00586404	0.00606731	0.00627066	0.00647409	0.00667758	0.00688116	0.0070848	0.00728853	0.00749232	0.0076962	0.00790015	0.00810417	0.00830828
						0.203	1.015	0	0.000200849	0.000401764	0.000602746	0.000803795	0.00100491	0.00120609	0.00140734	0.00160866	0.00181005	0.00201151	0.00221303	0.00241462	0.00261629	0.00281802	0.00301982	0.00322169	0.00342363	0.00362564	0.00382773	0.00402988	0.00423211	0.00443441	0.00463677	0.00483922	0.00504173	0.00524432	0.00544698	0.00564971	0.00585252	0.0060554	0.00625835	0.00646138	0.00666448	0.00686766	0.00707091	0.00727424	0.00747765	0.00768113	0.00788468	0.00808832	0.00829203
						0.2035	1.0175	0	0.000200451	0.000400969	0.000601554	0.000802205	0.00100292	0.00120371	0.00140456	0.00160549	0.00180648	0.00200754	0.00220867	0.00240986	0.00261113	0.00281247	0.00301387	0.00321535	0.0034169	0.00361851	0.0038202	0.00402196	0.0042238	0.0044257	0.00462768	0.00482972	0.00503184	0.00523404	0.0054363	0.00563864	0.00584106	0.00604355	0.00624611	0.00644875	0.00665146	0.00685424	0.0070571	0.00726004	0.00746306	0.00766615	0.00786931	0.00807255	0.00827587
						0.204	1.02	0	0.000200056	0.000400178	0.000600368	0.000800625	0.00100095	0.00120134	0.0014018	0.00160233	0.00180293	0.00200359	0.00220433	0.00240513	0.002606	0.00280695	0.00300796	0.00320905	0.0034102	0.00361143	0.00381272	0.00401409	0.00421553	0.00441704	0.00461863	0.00482028	0.00502201	0.00522382	0.00542569	0.00562764	0.00582967	0.00603176	0.00623394	0.00643618	0.00663851	0.0068409	0.00704338	0.00724592	0.00744855	0.00765125	0.00785403	0.00805688	0.00825981
						0.2045	1.0225	0	0.000199663	0.000399392	0.000599189	0.000799053	0.000998985	0.00119899	0.00139905	0.00159919	0.00179939	0.00199967	0.00220001	0.00240043	0.00260091	0.00280146	0.00300208	0.00320278	0.00340354	0.00360438	0.00380529	0.00400626	0.00420731	0.00440844	0.00460963	0.0048109	0.00501224	0.00521366	0.00541514	0.00561671	0.00581834	0.00602005	0.00622184	0.0064237	0.00662563	0.00682764	0.00702973	0.00723189	0.00743413	0.00763644	0.00783883	0.0080413	0.00824385
						0.205	1.025	0	0.000199272	0.000398611	0.000598017	0.000797491	0.000997033	0.00119664	0.00139632	0.00159607	0.00179588	0.00199577	0.00219572	0.00239575	0.00259584	0.00279601	0.00299624	0.00319655	0.00339692	0.00359737	0.00379789	0.00399848	0.00419914	0.00439988	0.00460069	0.00480157	0.00500253	0.00520355	0.00540465	0.00560583	0.00580708	0.00600841	0.0062098	0.00641128	0.00661283	0.00681445	0.00701616	0.00721793	0.00741979	0.00762172	0.00782372	0.00802581	0.00822797
						0.2055	1.0275	0	0.000198883	0.000397834	0.000596852	0.000795938	0.000995091	0.00119431	0.0013936	0.00159296	0.00179239	0.00199189	0.00219146	0.0023911	0.0025908	0.00279058	0.00299043	0.00319035	0.00339034	0.0035904	0.00379054	0.00399074	0.00419102	0.00439137	0.0045918	0.00479229	0.00499286	0.00519351	0.00539423	0.00559502	0.00579588	0.00599683	0.00619784	0.00639893	0.0066001	0.00680134	0.00700266	0.00720406	0.00740553	0.00760708	0.0078087	0.00801041	0.00821219
						0.206	1.03	0	0.000198497	0.000397061	0.000595693	0.000794393	0.000993161	0.001192	0.0013909	0.00158988	0.00178892	0.00198803	0.00218722	0.00238647	0.00258579	0.00278519	0.00298465	0.00318419	0.0033838	0.00358348	0.00378323	0.00398305	0.00418295	0.00438291	0.00458296	0.00478307	0.00498326	0.00518352	0.00538386	0.00558427	0.00578475	0.00598531	0.00618595	0.00638666	0.00658745	0.00678831	0.00698925	0.00719026	0.00739135	0.00759252	0.00779377	0.00799509	0.0081965
						0.2065	1.0325	0	0.000198113	0.000396293	0.000594541	0.000792857	0.000991242	0.0011897	0.00138822	0.00158681	0.00178547	0.0019842	0.002183	0.00238187	0.00258081	0.00277983	0.00297891	0.00317806	0.00337729	0.00357659	0.00377596	0.0039754	0.00417492	0.0043745	0.00457416	0.0047739	0.00497371	0.00517359	0.00537355	0.00557358	0.00577368	0.00597387	0.00617412	0.00637445	0.00657486	0.00677535	0.00697591	0.00717655	0.00737726	0.00757805	0.00777892	0.00797987	0.00818089
						0.207	1.035	0	0.000197731	0.000395529	0.000593395	0.00079133	0.000989333	0.00118741	0.00138555	0.00158376	0.00178204	0.00198039	0.00217881	0.0023773	0.00257586	0.00277449	0.0029732	0.00317197	0.00337082	0.00356974	0.00376873	0.00396779	0.00416693	0.00436614	0.00456542	0.00476478	0.00496421	0.00516372	0.0053633	0.00556295	0.00576268	0.00596248	0.00616236	0.00636232	0.00656235	0.00676246	0.00696265	0.00716291	0.00736325	0.00756366	0.00776416	0.00796473	0.00816538
						0.2075	1.0375	0	0.000197351	0.000394769	0.000592256	0.000789811	0.000987436	0.00118513	0.00138289	0.00158072	0.00177863	0.0019766	0.00217464	0.00237275	0.00257094	0.00276919	0.00296752	0.00316592	0.00336439	0.00356293	0.00376154	0.00396023	0.00415899	0.00435782	0.00455673	0.00475571	0.00495477	0.0051539	0.0053531	0.00555238	0.00575174	0.00595117	0.00615067	0.00635025	0.00654991	0.00674965	0.00694946	0.00714935	0.00734931	0.00754936	0.00774948	0.00794968	0.00814996
						0.208	1.04	0	0.000196973	0.000394014	0.000591123	0.000788301	0.000985549	0.00118286	0.00138025	0.00157771	0.00177523	0.00197283	0.00217049	0.00236823	0.00256604	0.00276392	0.00296187	0.00315989	0.00335799	0.00355616	0.0037544	0.00395271	0.0041511	0.00434956	0.00454809	0.0047467	0.00494538	0.00514414	0.00534297	0.00554187	0.00574086	0.00593991	0.00613905	0.00633826	0.00653754	0.00673691	0.00693635	0.00713586	0.00733546	0.00753513	0.00773488	0.00793471	0.00813462
						0.2085	1.0425	0	0.000196597	0.000393263	0.000589997	0.0007868	0.000983672	0.00118061	0.00137763	0.00157471	0.00177186	0.00196908	0.00216637	0.00236374	0.00256117	0.00275868	0.00295626	0.00315391	0.00335163	0.00354942	0.00374729	0.00394523	0.00414325	0.00434134	0.0045395	0.00473773	0.00493604	0.00513443	0.00533289	0.00553143	0.00573004	0.00592873	0.00612749	0.00632633	0.00652525	0.00672424	0.00692331	0.00712246	0.00732168	0.00752099	0.00772037	0.00791983	0.00811937
						0.209	1.045	0	0.000196224	0.000392516	0.000588877	0.000785307	0.000981806	0.00117838	0.00137501	0.00157172	0.0017685	0.00196535	0.00216227	0.00235927	0.00255633	0.00275346	0.00295067	0.00314795	0.0033453	0.00354273	0.00374023	0.0039378	0.00413544	0.00433316	0.00453095	0.00472882	0.00492676	0.00512478	0.00532287	0.00552104	0.00571928	0.0059176	0.006116	0.00631447	0.00651302	0.00671164	0.00691035	0.00710913	0.00730799	0.00750692	0.00770594	0.00790503	0.00810421
						0.2095	1.0475	0	0.000195852	0.000391773	0.000587763	0.000783822	0.000979951	0.00117615	0.00137242	0.00156876	0.00176517	0.00196165	0.0021582	0.00235482	0.00255151	0.00274828	0.00294512	0.00314203	0.00333901	0.00353607	0.0037332	0.0039304	0.00412768	0.00432503	0.00452246	0.00471996	0.00491753	0.00511518	0.00531291	0.00551071	0.00570859	0.00590654	0.00610457	0.00630267	0.00650086	0.00669912	0.00689746	0.00709587	0.00729437	0.00749294	0.00769159	0.00789032	0.00808913
						0.21	1.05	0	0.000195483	0.000391035	0.000586656	0.000782346	0.000978106	0.00117394	0.00136984	0.00156581	0.00176185	0.00195796	0.00215414	0.0023504	0.00254673	0.00274313	0.0029396	0.00313614	0.00333276	0.00352945	0.00372621	0.00392305	0.00411996	0.00431695	0.00451401	0.00471114	0.00490835	0.00510564	0.005303	0.00550044	0.00569795	0.00589554	0.0060932	0.00629095	0.00648877	0.00668666	0.00688464	0.00708269	0.00728083	0.00747904	0.00767732	0.00787569	0.00807414
						0.2105	1.0525	0	0.000195116	0.0003903	0.000585554	0.000780878	0.000976271	0.00117174	0.00136727	0.00156287	0.00175855	0.0019543	0.00215011	0.00234601	0.00254197	0.002738	0.00293411	0.00313029	0.00332654	0.00352287	0.00371927	0.00391574	0.00411229	0.00430891	0.00450561	0.00470238	0.00489923	0.00509615	0.00529315	0.00549022	0.00568737	0.0058846	0.0060819	0.00627929	0.00647674	0.00667428	0.0068719	0.00706959	0.00726736	0.00746521	0.00766314	0.00786115	0.00805923
						0.211	1.055	0	0.00019475	0.00038957	0.000584459	0.000779418	0.000974447	0.00116955	0.00136472	0.00155996	0.00175527	0.00195065	0.00214611	0.00234163	0.00253723	0.0027329	0.00292865	0.00312447	0.00332036	0.00351632	0.00371236	0.00390847	0.00410466	0.00430092	0.00449725	0.00469367	0.00489015	0.00508671	0.00528335	0.00548007	0.00567686	0.00587372	0.00607067	0.00626769	0.00646479	0.00666197	0.00685922	0.00705656	0.00725397	0.00745146	0.00764903	0.00784668	0.00804441
						0.2115	1.0575	0	0.000194387	0.000388844	0.00058337	0.000777966	0.000972633	0.00116737	0.00136218	0.00155706	0.00175201	0.00194703	0.00214212	0.00233729	0.00253253	0.00272784	0.00292322	0.00311868	0.00331421	0.00350981	0.00370549	0.00390124	0.00409707	0.00429297	0.00448895	0.004685	0.00488113	0.00507733	0.00527361	0.00546997	0.0056664	0.00586291	0.0060595	0.00625616	0.0064529	0.00664972	0.00684662	0.0070436	0.00724066	0.00743779	0.00763501	0.0078323	0.00802967
						0.212	1.06	0	0.000194026	0.000388121	0.000582287	0.000776522	0.000970829	0.00116521	0.00135965	0.00155417	0.00174876	0.00194342	0.00213816	0.00233297	0.00252784	0.0027228	0.00291782	0.00311292	0.00330809	0.00350334	0.00369866	0.00389405	0.00408952	0.00428507	0.00448069	0.00467638	0.00487215	0.005068	0.00526392	0.00545992	0.005656	0.00585215	0.00604839	0.00624469	0.00644108	0.00663755	0.00683409	0.00703071	0.00722742	0.0074242	0.00762106	0.007818	0.00801502
						0.2125	1.0625	0	0.000193667	0.000387403	0.00058121	0.000775087	0.000969034	0.00116305	0.00135714	0.0015513	0.00174554	0.00193984	0.00213422	0.00232867	0.00252319	0.00271779	0.00291245	0.0031072	0.00330201	0.0034969	0.00369187	0.00388691	0.00408202	0.00427721	0.00447247	0.00466781	0.00486323	0.00505872	0.00525429	0.00544994	0.00564566	0.00584146	0.00603734	0.00623329	0.00642933	0.00662544	0.00682163	0.0070179	0.00721425	0.00741068	0.00760719	0.00780378	0.00800045
						0.213	1.065	0	0.000193309	0.000386689	0.000580139	0.000773659	0.00096725	0.00116091	0.00135465	0.00154845	0.00174233	0.00193628	0.0021303	0.00232439	0.00251856	0.0027128	0.00290712	0.0031015	0.00329596	0.0034905	0.00368511	0.0038798	0.00407456	0.00426939	0.0044643	0.00465929	0.00485435	0.00504949	0.00524471	0.00544001	0.00563538	0.00583082	0.00602635	0.00622196	0.00641764	0.0066134	0.00680924	0.00700516	0.00720116	0.00739724	0.0075934	0.00778963	0.00798595
						0.2135	1.0675	0	0.000192954	0.000385979	0.000579073	0.000772239	0.000965476	0.00115878	0.00135216	0.00154561	0.00173914	0.00193273	0.0021264	0.00232014	0.00251396	0.00270784	0.00290181	0.00309584	0.00328995	0.00348413	0.00367839	0.00387273	0.00406714	0.00426162	0.00445618	0.00465082	0.00484553	0.00504032	0.00523519	0.00543013	0.00562515	0.00582025	0.00601543	0.00621068	0.00640601	0.00660143	0.00679692	0.00699249	0.00718814	0.00738387	0.00757968	0.00777557	0.00797154
						0.214	1.07	0	0.000192601	0.000385272	0.000578014	0.000770827	0.000963711	0.00115667	0.00134969	0.00154279	0.00173596	0.00192921	0.00212253	0.00231592	0.00250938	0.00270292	0.00289653	0.00309021	0.00328397	0.0034778	0.00367171	0.0038657	0.00405976	0.00425389	0.0044481	0.00464239	0.00483675	0.0050312	0.00522571	0.00542031	0.00561498	0.00580973	0.00600456	0.00619947	0.00639446	0.00658952	0.00678467	0.00697989	0.00717519	0.00737058	0.00756604	0.00776159	0.00795721
						0.2145	1.0725	0	0.00019225	0.00038457	0.000576961	0.000769423	0.000961956	0.00115456	0.00134724	0.00153999	0.00173281	0.0019257	0.00211867	0.00231171	0.00250483	0.00269801	0.00289128	0.00308461	0.00327802	0.00347151	0.00366507	0.00385871	0.00405242	0.00424621	0.00444007	0.00463401	0.00482803	0.00502212	0.00521629	0.00541054	0.00560487	0.00579927	0.00599376	0.00618832	0.00638296	0.00657768	0.00677248	0.00696736	0.00716232	0.00735736	0.00755248	0.00774768	0.00794296
						0.215	1.075	0	0.0001919	0.000383871	0.000575913	0.000768026	0.000960211	0.00115247	0.0013448	0.0015372	0.00172967	0.00192222	0.00211484	0.00230753	0.0025003	0.00269314	0.00288605	0.00307904	0.00327211	0.00346525	0.00365846	0.00385175	0.00404512	0.00423856	0.00443208	0.00462568	0.00481935	0.0050131	0.00520693	0.00540083	0.00559481	0.00578887	0.00598301	0.00617723	0.00637153	0.00656591	0.00676036	0.0069549	0.00714952	0.00734421	0.00753899	0.00773385	0.00792879
						0.2155	1.0775	0	0.000191553	0.000383176	0.000574871	0.000766637	0.000958476	0.00115039	0.00134237	0.00153442	0.00172655	0.00191875	0.00211103	0.00230337	0.0024958	0.00268829	0.00288086	0.00307351	0.00326623	0.00345902	0.00365189	0.00384484	0.00403786	0.00423096	0.00442414	0.00461739	0.00481072	0.00500412	0.00519761	0.00539117	0.00558481	0.00577853	0.00597233	0.00616621	0.00636016	0.0065542	0.00674831	0.00694251	0.00713678	0.00733114	0.00752558	0.0077201	0.0079147
						0.216	1.08	0	0.000191207	0.000382485	0.000573835	0.000765256	0.000956749	0.00114831	0.00133995	0.00153166	0.00172345	0.0019153	0.00210723	0.00229924	0.00249132	0.00268347	0.0028757	0.003068	0.00326038	0.00345283	0.00364536	0.00383796	0.00403064	0.0042234	0.00441623	0.00460915	0.00480213	0.0049952	0.00518834	0.00538157	0.00557487	0.00576825	0.0059617	0.00615524	0.00634886	0.00654255	0.00673633	0.00693019	0.00712412	0.00731814	0.00751224	0.00770642	0.00790068
						0.2165	1.0825	0	0.000190863	0.000381798	0.000572804	0.000763882	0.000955033	0.00114626	0.00133755	0.00152892	0.00172036	0.00191188	0.00210346	0.00229513	0.00248686	0.00267868	0.00287056	0.00306252	0.00325456	0.00344667	0.00363886	0.00383112	0.00402347	0.00421588	0.00440838	0.00460095	0.0047936	0.00498633	0.00517913	0.00537201	0.00556498	0.00575802	0.00595114	0.00614434	0.00633761	0.00653097	0.00672441	0.00691793	0.00711153	0.00730521	0.00749898	0.00769282	0.00788675
						0.217	1.085	0	0.000190521	0.000381114	0.000571779	0.000762516	0.000953325	0.00114421	0.00133516	0.00152619	0.00171729	0.00190847	0.00209971	0.00229104	0.00248243	0.00267391	0.00286545	0.00305708	0.00324877	0.00344055	0.0036324	0.00382432	0.00401633	0.00420841	0.00440056	0.0045928	0.00478511	0.0049775	0.00516997	0.00536251	0.00555514	0.00574784	0.00594063	0.00613349	0.00632643	0.00651946	0.00671256	0.00690575	0.00709901	0.00729236	0.00748579	0.0076793	0.00787289
						0.2175	1.0875	0	0.000190181	0.000380435	0.00057076	0.000761157	0.000951627	0.00114217	0.00133279	0.00152348	0.00171424	0.00190507	0.00209598	0.00228697	0.00247803	0.00266916	0.00286037	0.00305166	0.00324302	0.00343446	0.00362597	0.00381756	0.00400923	0.00420097	0.00439279	0.00458469	0.00477667	0.00496872	0.00516085	0.00535307	0.00554536	0.00573773	0.00593018	0.00612271	0.00631531	0.006508	0.00670077	0.00689363	0.00708656	0.00727957	0.00747267	0.00766584	0.0078591
						0.218	1.09	0	0.000189843	0.000379759	0.000569746	0.000759806	0.000949939	0.00114014	0.00133042	0.00152078	0.0017112	0.0019017	0.00209228	0.00228292	0.00247365	0.00266445	0.00285532	0.00304627	0.0032373	0.0034284	0.00361958	0.00381083	0.00400217	0.00419358	0.00438506	0.00457663	0.00476827	0.00495999	0.00515179	0.00534367	0.00553563	0.00572766	0.00591978	0.00611198	0.00630426	0.00649661	0.00668905	0.00688157	0.00707417	0.00726686	0.00745962	0.00765247	0.0078454
						0.2185	1.0925	0	0.000189507	0.000379086	0.000568738	0.000758462	0.000948259	0.00113813	0.00132807	0.00151809	0.00170818	0.00189835	0.00208859	0.0022789	0.00246929	0.00265976	0.0028503	0.00304091	0.00323161	0.00342238	0.00361322	0.00380414	0.00399514	0.00418622	0.00437738	0.00456861	0.00475992	0.00495131	0.00514278	0.00533432	0.00552595	0.00571766	0.00590944	0.00610131	0.00629326	0.00648529	0.0066774	0.00686959	0.00706186	0.00725421	0.00744665	0.00763916	0.00783176
						0.219	1.095	0	0.000189173	0.000378417	0.000567735	0.000757125	0.000946588	0.00113613	0.00132574	0.00151542	0.00170518	0.00189501	0.00208492	0.0022749	0.00246496	0.00265509	0.0028453	0.00303558	0.00322595	0.00341638	0.0036069	0.00379749	0.00398816	0.00417891	0.00436973	0.00456063	0.00475161	0.00494267	0.00513381	0.00532503	0.00551633	0.00570771	0.00589916	0.0060907	0.00628232	0.00647402	0.0066658	0.00685766	0.00704961	0.00724163	0.00743374	0.00762593	0.00781821
						0.2195	1.0975	0	0.00018884	0.000377752	0.000566737	0.000755795	0.000944927	0.00113413	0.00132341	0.00151276	0.00170219	0.00189169	0.00208127	0.00227092	0.00246065	0.00265045	0.00284033	0.00303028	0.00322032	0.00341042	0.00360061	0.00379087	0.00398121	0.00417163	0.00436213	0.0045527	0.00474335	0.00493409	0.0051249	0.00531579	0.00550676	0.00569781	0.00588894	0.00608015	0.00627144	0.00646282	0.00665427	0.00684581	0.00703743	0.00722913	0.00742091	0.00761277	0.00780472
						0.22	1.1	0	0.000188509	0.000377091	0.000565745	0.000754473	0.000943274	0.00113215	0.0013211	0.00151012	0.00169922	0.00188839	0.00207764	0.00226696	0.00245636	0.00264584	0.00283539	0.00302501	0.00321472	0.0034045	0.00359436	0.00378429	0.0039743	0.00416439	0.00435456	0.00454481	0.00473514	0.00492555	0.00511603	0.0053066	0.00549724	0.00568797	0.00587877	0.00606966	0.00626062	0.00645167	0.0066428	0.00683402	0.00702531	0.00721669	0.00740815	0.00759969	0.00779131
						0.2205	1.1025	0	0.00018818	0.000376433	0.000564759	0.000753158	0.000941631	0.00113018	0.0013188	0.00150749	0.00169626	0.00188511	0.00207403	0.00226303	0.0024521	0.00264125	0.00283047	0.00301977	0.00320915	0.0033986	0.00358814	0.00377774	0.00396743	0.0041572	0.00434704	0.00453697	0.00472697	0.00491705	0.00510721	0.00529745	0.00548777	0.00567818	0.00586866	0.00605922	0.00624986	0.00644059	0.0066314	0.00682229	0.00701326	0.00720431	0.00739545	0.00758667	0.00777798
						0.221	1.105	0	0.000187853	0.000375778	0.000563777	0.00075185	0.000939996	0.00112822	0.00131651	0.00150488	0.00169333	0.00188184	0.00207044	0.00225911	0.00244786	0.00263668	0.00282558	0.00301456	0.00320361	0.00339274	0.00358195	0.00377123	0.0039606	0.00415004	0.00433956	0.00452916	0.00471884	0.0049086	0.00509844	0.00528836	0.00547836	0.00566844	0.0058586	0.00604884	0.00623916	0.00642957	0.00662005	0.00681062	0.00700128	0.00719201	0.00738283	0.00757373	0.00776471
						0.2215	1.1075	0	0.000187527	0.000375127	0.000562801	0.000750548	0.00093837	0.00112627	0.00131424	0.00150228	0.0016904	0.0018786	0.00206687	0.00225522	0.00244364	0.00263214	0.00282072	0.00300937	0.0031981	0.00338691	0.00357579	0.00376476	0.0039538	0.00414292	0.00433212	0.0045214	0.00471076	0.0049002	0.00508972	0.00527931	0.00546899	0.00565875	0.00584859	0.00603852	0.00622852	0.00641861	0.00660877	0.00679902	0.00698936	0.00717977	0.00737027	0.00756085	0.00775152
						0.222	1.11	0	0.000187203	0.00037448	0.00056183	0.000749254	0.000936753	0.00112433	0.00131197	0.0014997	0.00168749	0.00187537	0.00206332	0.00225134	0.00243944	0.00262762	0.00281588	0.00300421	0.00319262	0.00338111	0.00356967	0.00375832	0.00394704	0.00413584	0.00432472	0.00451368	0.00470272	0.00489184	0.00508104	0.00527032	0.00545968	0.00564912	0.00583864	0.00602825	0.00621793	0.0064077	0.00659755	0.00678749	0.0069775	0.0071676	0.00735778	0.00754805	0.0077384
						0.2225	1.1125	0	0.000186881	0.000373836	0.000560864	0.000747967	0.000935144	0.0011224	0.00130972	0.00149712	0.0016846	0.00187215	0.00205978	0.00224749	0.00243527	0.00262313	0.00281107	0.00299908	0.00318717	0.00337534	0.00356359	0.00375191	0.00394032	0.0041288	0.00431736	0.004506	0.00469473	0.00488353	0.00507241	0.00526137	0.00545042	0.00563954	0.00582875	0.00601803	0.0062074	0.00639686	0.00658639	0.00677601	0.00696571	0.00715549	0.00734536	0.00753531	0.00772535
						0.223	1.115	0	0.000186561	0.000373195	0.000559903	0.000746686	0.000933544	0.00112048	0.00130748	0.00149457	0.00168172	0.00186896	0.00205627	0.00224366	0.00243112	0.00261866	0.00280628	0.00299398	0.00318175	0.0033696	0.00355753	0.00374554	0.00393363	0.00412179	0.00431004	0.00449837	0.00468677	0.00487526	0.00506383	0.00525247	0.0054412	0.00563001	0.0058189	0.00600788	0.00619693	0.00638607	0.00657529	0.0067646	0.00695398	0.00714345	0.00733301	0.00752265	0.00771237
						0.2235	1.1175	0	0.000186242	0.000372558	0.000558948	0.000745413	0.000931952	0.00111857	0.00130526	0.00149202	0.00167886	0.00186578	0.00205277	0.00223985	0.00242699	0.00261422	0.00280152	0.0029889	0.00317636	0.00336389	0.00355151	0.0037392	0.00392698	0.00411483	0.00430276	0.00449077	0.00467886	0.00486703	0.00505529	0.00524362	0.00543204	0.00562053	0.00580911	0.00599777	0.00618652	0.00637534	0.00656425	0.00675324	0.00694232	0.00713148	0.00732072	0.00751005	0.00769946
						0.224	1.12	0	0.000185925	0.000371924	0.000557997	0.000744146	0.000930369	0.00111667	0.00130304	0.00148949	0.00167602	0.00186262	0.0020493	0.00223605	0.00242289	0.0026098	0.00279678	0.00298385	0.00317099	0.00335822	0.00354552	0.0037329	0.00392036	0.0041079	0.00429552	0.00448322	0.00467099	0.00485886	0.0050468	0.00523482	0.00542292	0.00561111	0.00579937	0.00598772	0.00617616	0.00636467	0.00655327	0.00674195	0.00693072	0.00711957	0.0073085	0.00749752	0.00768662
						0.2245	1.1225	0	0.00018561	0.000371293	0.000557052	0.000742886	0.000928794	0.00111478	0.00130084	0.00148697	0.00167319	0.00185947	0.00204584	0.00223228	0.0024188	0.0026054	0.00279208	0.00297883	0.00316566	0.00335257	0.00353956	0.00372663	0.00391378	0.004101	0.00428831	0.0044757	0.00466317	0.00485072	0.00503835	0.00522606	0.00541386	0.00560173	0.00578969	0.00597773	0.00616585	0.00635406	0.00654235	0.00673072	0.00691918	0.00710772	0.00729635	0.00748506	0.00767385
						0.225	1.125	0	0.000185296	0.000370666	0.000556112	0.000741632	0.000927228	0.0011129	0.00129865	0.00148447	0.00167037	0.00185635	0.0020424	0.00222853	0.00241474	0.00260103	0.00278739	0.00297383	0.00316035	0.00334695	0.00353363	0.00372039	0.00390723	0.00409415	0.00428115	0.00446823	0.00465539	0.00484263	0.00502995	0.00521735	0.00540484	0.0055924	0.00578005	0.00596779	0.0061556	0.0063435	0.00653148	0.00671955	0.0069077	0.00709594	0.00728425	0.00747266	0.00766115
						0.2255	1.1275	0	0.000184984	0.000370043	0.000555176	0.000740385	0.00092567	0.00111103	0.00129647	0.00148198	0.00166757	0.00185324	0.00203898	0.0022248	0.0024107	0.00259668	0.00278273	0.00296886	0.00315508	0.00334137	0.00352774	0.00371419	0.00390072	0.00408733	0.00427402	0.00446079	0.00464764	0.00483458	0.00502159	0.00520869	0.00539587	0.00558313	0.00577047	0.0059579	0.00614541	0.006333	0.00652068	0.00670844	0.00689628	0.00708421	0.00727223	0.00746033	0.00764851
						0.226	1.13	0	0.000184674	0.000369422	0.000554246	0.000739145	0.00092412	0.00110917	0.0012943	0.0014795	0.00166478	0.00185014	0.00203558	0.00222109	0.00240668	0.00259235	0.0027781	0.00296392	0.00314983	0.00333581	0.00352187	0.00370802	0.00389424	0.00408054	0.00426693	0.00445339	0.00463994	0.00482657	0.00501328	0.00520007	0.00538694	0.0055739	0.00576094	0.00594806	0.00613527	0.00632256	0.00650993	0.00669739	0.00688493	0.00707256	0.00726027	0.00744806	0.00763595
						0.2265	1.1325	0	0.000184365	0.000368805	0.00055332	0.000737911	0.000922578	0.00110732	0.00129214	0.00147704	0.00166201	0.00184706	0.00203219	0.0022174	0.00240268	0.00258804	0.00277348	0.002959	0.0031446	0.00333028	0.00351604	0.00370188	0.0038878	0.0040738	0.00425988	0.00444604	0.00463228	0.0048186	0.00500501	0.0051915	0.00537807	0.00556472	0.00575146	0.00593828	0.00612518	0.00631217	0.00649924	0.00668639	0.00687363	0.00706096	0.00724837	0.00743587	0.00762345
						0.227	1.135	0	0.000184058	0.000368191	0.000552399	0.000736684	0.000921045	0.00110548	0.00129	0.00147459	0.00165925	0.001844	0.00202882	0.00221372	0.0023987	0.00258376	0.0027689	0.00295411	0.00313941	0.00332478	0.00351024	0.00369577	0.00388139	0.00406709	0.00425286	0.00443872	0.00462466	0.00481068	0.00499679	0.00518297	0.00536924	0.00555559	0.00574203	0.00592855	0.00611515	0.00630183	0.0064886	0.00667546	0.0068624	0.00704942	0.00723653	0.00742373	0.00761101
						0.2275	1.1375	0	0.000183752	0.00036758	0.000551483	0.000735463	0.000919519	0.00110365	0.00128786	0.00147215	0.00165651	0.00184095	0.00202547	0.00221007	0.00239475	0.0025795	0.00276434	0.00294925	0.00313424	0.00331931	0.00350447	0.0036897	0.00387501	0.00406041	0.00424588	0.00443144	0.00461708	0.0048028	0.00498861	0.00517449	0.00536046	0.00554651	0.00573265	0.00591887	0.00610517	0.00629156	0.00647803	0.00666458	0.00685122	0.00703795	0.00722476	0.00741166	0.00759865
						0.228	1.14	0	0.000183448	0.000366972	0.000550572	0.000734249	0.000918001	0.00110183	0.00128574	0.00146972	0.00165378	0.00183792	0.00202214	0.00220644	0.00239081	0.00257526	0.0027598	0.00294441	0.0031291	0.00331387	0.00349873	0.00368366	0.00386867	0.00405377	0.00423894	0.0044242	0.00460954	0.00479496	0.00498047	0.00516605	0.00535172	0.00553748	0.00572332	0.00590924	0.00609524	0.00628133	0.0064675	0.00665376	0.00684011	0.00702654	0.00721305	0.00739966	0.00758634
						0.2285	1.1425	0	0.000183146	0.000366368	0.000549666	0.00073304	0.000916492	0.00110002	0.00128363	0.00146731	0.00165107	0.00183491	0.00201883	0.00220282	0.0023869	0.00257105	0.00275528	0.0029396	0.00312399	0.00330846	0.00349301	0.00367765	0.00386236	0.00404716	0.00423204	0.004417	0.00460204	0.00478717	0.00497237	0.00515766	0.00534304	0.00552849	0.00571403	0.00589966	0.00608537	0.00627116	0.00645704	0.006643	0.00682905	0.00701519	0.00720141	0.00738771	0.00757411
						0.229	1.145	0	0.000182845	0.000365767	0.000548764	0.000731839	0.00091499	0.00109822	0.00128152	0.00146491	0.00164837	0.00183191	0.00201553	0.00219922	0.002383	0.00256686	0.00275079	0.00293481	0.0031189	0.00330308	0.00348733	0.00367167	0.00385609	0.00404059	0.00422517	0.00440983	0.00459458	0.00477941	0.00496432	0.00514931	0.00533439	0.00551955	0.0057048	0.00589013	0.00607554	0.00626104	0.00644663	0.0066323	0.00681805	0.00700389	0.00718982	0.00737583	0.00756193
						0.2295	1.1475	0	0.000182546	0.000365168	0.000547867	0.000730643	0.000913496	0.00109643	0.00127943	0.00146252	0.00164568	0.00182893	0.00201225	0.00219565	0.00237913	0.00256269	0.00274632	0.00293004	0.00311384	0.00329772	0.00348168	0.00366572	0.00384985	0.00403405	0.00421834	0.00440271	0.00458716	0.00477169	0.00495631	0.00514101	0.00532579	0.00551066	0.00569561	0.00588065	0.00606577	0.00625098	0.00643627	0.00662165	0.00680711	0.00699266	0.0071783	0.00736402	0.00754983
						0.23	1.15	0	0.000182248	0.000364573	0.000546975	0.000729454	0.00091201	0.00109464	0.00127735	0.00146014	0.00164301	0.00182596	0.00200898	0.00219209	0.00237527	0.00255854	0.00274188	0.0029253	0.00310881	0.00329239	0.00347606	0.00365981	0.00384364	0.00402755	0.00421154	0.00439562	0.00457978	0.00476402	0.00494834	0.00513275	0.00531724	0.00550182	0.00568648	0.00587122	0.00605605	0.00624097	0.00642597	0.00661105	0.00679623	0.00698149	0.00716683	0.00735226	0.00753778
						0.2305	1.1525	0	0.000181952	0.000363981	0.000546087	0.00072827	0.000910531	0.00109287	0.00127529	0.00145778	0.00164035	0.00182301	0.00200574	0.00218855	0.00237144	0.00255441	0.00273746	0.00292059	0.0031038	0.00328709	0.00347047	0.00365392	0.00383746	0.00402108	0.00420478	0.00438856	0.00457243	0.00475638	0.00494041	0.00512453	0.00530873	0.00549302	0.00567739	0.00586184	0.00604638	0.00623101	0.00641572	0.00660052	0.0067854	0.00697037	0.00715543	0.00734057	0.0075258
						0.231	1.155	0	0.000181658	0.000363392	0.000545204	0.000727093	0.00090906	0.00109111	0.00127323	0.00145543	0.00163771	0.00182007	0.00200251	0.00218503	0.00236762	0.0025503	0.00273306	0.0029159	0.00309882	0.00328182	0.0034649	0.00364807	0.00383131	0.00401464	0.00419805	0.00438155	0.00456512	0.00474879	0.00493253	0.00511636	0.00530027	0.00548427	0.00566835	0.00585251	0.00603677	0.0062211	0.00640553	0.00659003	0.00677463	0.00695931	0.00714408	0.00732894	0.00751388
						0.2315	1.1575	0	0.000181365	0.000362806	0.000544326	0.000725922	0.000907597	0.00108935	0.00127118	0.00145309	0.00163508	0.00181715	0.0019993	0.00218152	0.00236383	0.00254622	0.00272869	0.00291123	0.00309386	0.00327658	0.00345937	0.00364224	0.0038252	0.00400824	0.00419136	0.00437457	0.00455786	0.00474123	0.00492468	0.00510822	0.00529185	0.00547556	0.00565935	0.00584323	0.0060272	0.00621125	0.00639538	0.00657961	0.00676392	0.00694831	0.0071328	0.00731737	0.00750203
						0.232	1.16	0	0.000181073	0.000362224	0.000543452	0.000724757	0.000906141	0.0010876	0.00126914	0.00145076	0.00163246	0.00181424	0.0019961	0.00217804	0.00236005	0.00254215	0.00272433	0.00290659	0.00308893	0.00327136	0.00345386	0.00363645	0.00381912	0.00400187	0.00418471	0.00436762	0.00455063	0.00473371	0.00491688	0.00510014	0.00528347	0.0054669	0.00565041	0.005834	0.00601768	0.00620144	0.0063853	0.00656923	0.00675326	0.00693737	0.00712157	0.00730586	0.00749023
						0.2325	1.1625	0	0.000180783	0.000361644	0.000542582	0.000723598	0.000904693	0.00108587	0.00126712	0.00144845	0.00162986	0.00181135	0.00199292	0.00217457	0.0023563	0.00253811	0.00272	0.00290198	0.00308403	0.00326617	0.00344838	0.00363069	0.00381307	0.00399554	0.00417808	0.00436072	0.00454343	0.00472623	0.00490912	0.00509209	0.00527514	0.00545828	0.0056415	0.00582481	0.00600821	0.00619169	0.00637526	0.00655891	0.00674266	0.00692649	0.0071104	0.00729441	0.0074785
						0.233	1.165	0	0.000180495	0.000361067	0.000541717	0.000722445	0.000903252	0.00108414	0.0012651	0.00144615	0.00162727	0.00180847	0.00198976	0.00217112	0.00235256	0.00253409	0.00271569	0.00289738	0.00307915	0.003261	0.00344294	0.00362495	0.00380705	0.00398923	0.0041715	0.00435385	0.00453628	0.00471879	0.0049014	0.00508408	0.00526685	0.00544971	0.00563265	0.00581568	0.00599879	0.00618199	0.00636528	0.00654865	0.00673211	0.00691566	0.00709929	0.00728302	0.00746683
						0.2335	1.1675	0	0.000180208	0.000360493	0.000540856	0.000721298	0.000901819	0.00108242	0.0012631	0.00144385	0.00162469	0.00180561	0.00198661	0.00216769	0.00234885	0.00253009	0.00271141	0.00289281	0.0030743	0.00325586	0.00343751	0.00361925	0.00380106	0.00398296	0.00416494	0.00434701	0.00452916	0.00471139	0.00489371	0.00507612	0.00525861	0.00544118	0.00562384	0.00580659	0.00598942	0.00617234	0.00635534	0.00653844	0.00672162	0.00690488	0.00708824	0.00727168	0.00745522
						0.234	1.17	0	0.000179922	0.000359922	0.00054	0.000720157	0.000900393	0.00108071	0.0012611	0.00144158	0.00162213	0.00180276	0.00198348	0.00216427	0.00234515	0.00252611	0.00270714	0.00288827	0.00306947	0.00325075	0.00343212	0.00361357	0.00379511	0.00397672	0.00415842	0.00434021	0.00452208	0.00470403	0.00488607	0.00506819	0.0052504	0.0054327	0.00561508	0.00579754	0.0059801	0.00616274	0.00634546	0.00652828	0.00671118	0.00689417	0.00707725	0.00726041	0.00744367
						0.2345	1.1725	0	0.000179638	0.000359354	0.000539148	0.000719022	0.000898974	0.00107901	0.00125912	0.00143931	0.00161958	0.00179993	0.00198036	0.00216088	0.00234147	0.00252215	0.0027029	0.00288374	0.00306466	0.00324567	0.00342676	0.00360793	0.00378918	0.00397052	0.00415194	0.00433344	0.00451503	0.00469671	0.00487847	0.00506031	0.00524224	0.00542426	0.00560636	0.00578855	0.00597082	0.00615318	0.00633563	0.00651817	0.00670079	0.00688351	0.00706631	0.0072492	0.00743218
						0.235	1.175	0	0.000179355	0.000358789	0.000538301	0.000717892	0.000897562	0.00107731	0.00125714	0.00143705	0.00161704	0.00179711	0.00197726	0.0021575	0.00233781	0.00251821	0.00269868	0.00287924	0.00305988	0.00324061	0.00342142	0.00360231	0.00378328	0.00396434	0.00414548	0.00432671	0.00450802	0.00468942	0.0048709	0.00505247	0.00523412	0.00541586	0.00559768	0.0057796	0.00596159	0.00614368	0.00632585	0.00650811	0.00669046	0.0068729	0.00705543	0.00723804	0.00742074
						0.2355	1.1775	0	0.000179074	0.000358226	0.000537458	0.000716768	0.000896158	0.00107563	0.00125518	0.00143481	0.00161452	0.00179431	0.00197418	0.00215413	0.00233417	0.00251429	0.00269448	0.00287477	0.00305513	0.00323558	0.00341611	0.00359672	0.00377742	0.0039582	0.00413906	0.00432001	0.00450105	0.00468217	0.00486337	0.00504467	0.00522604	0.00540751	0.00558906	0.00577069	0.00595242	0.00613423	0.00631612	0.00649811	0.00668019	0.00686235	0.0070446	0.00722694	0.00740937
						0.236	1.18	0	0.000178794	0.000357667	0.000536619	0.00071565	0.000894761	0.00107395	0.00125322	0.00143257	0.00161201	0.00179152	0.00197111	0.00215079	0.00233055	0.00251039	0.00269031	0.00287031	0.0030504	0.00323057	0.00341082	0.00359116	0.00377158	0.00395209	0.00413268	0.00431335	0.00449411	0.00467496	0.00485589	0.0050369	0.00521801	0.00539919	0.00558047	0.00576183	0.00594328	0.00612482	0.00630645	0.00648816	0.00666996	0.00685185	0.00703383	0.0072159	0.00739806
						0.2365	1.1825	0	0.000178516	0.00035711	0.000535784	0.000714537	0.000893371	0.00107228	0.00125128	0.00143035	0.00160951	0.00178874	0.00196806	0.00214746	0.00232694	0.00250651	0.00268615	0.00286588	0.00304569	0.00322559	0.00340557	0.00358563	0.00376577	0.00394601	0.00412632	0.00430672	0.00448721	0.00466778	0.00484844	0.00502918	0.00521001	0.00539093	0.00557193	0.00575302	0.0059342	0.00611546	0.00629682	0.00647826	0.00665979	0.00684141	0.00702312	0.00720491	0.0073868
						0.237	1.185	0	0.000178239	0.000356556	0.000534954	0.000713431	0.000891988	0.00107062	0.00124934	0.00142814	0.00160702	0.00178598	0.00196502	0.00214415	0.00232336	0.00250264	0.00268202	0.00286147	0.00304101	0.00322063	0.00340034	0.00358012	0.00376	0.00393996	0.00412	0.00430013	0.00448034	0.00466064	0.00484103	0.0050215	0.00520206	0.0053827	0.00556343	0.00574425	0.00592516	0.00610615	0.00628724	0.00646841	0.00664967	0.00683102	0.00701246	0.00719398	0.0073756
						0.2375	1.1875	0	0.000177963	0.000356005	0.000534127	0.000712329	0.000890611	0.00106897	0.00124742	0.00142594	0.00160455	0.00178323	0.001962	0.00214085	0.00231979	0.0024988	0.0026779	0.00285708	0.00303635	0.0032157	0.00339513	0.00357465	0.00375425	0.00393394	0.00411371	0.00429357	0.00447351	0.00465354	0.00483365	0.00501385	0.00519414	0.00537452	0.00555498	0.00573553	0.00591617	0.00609689	0.00627771	0.00645861	0.0066396	0.00682068	0.00700185	0.00718311	0.00736446
						0.238	1.19	0	0.000177689	0.000355457	0.000533305	0.000711234	0.000889242	0.00106733	0.0012455	0.00142375	0.00160209	0.0017805	0.001959	0.00213758	0.00231624	0.00249498	0.00267381	0.00285272	0.00303171	0.00321079	0.00338995	0.0035692	0.00374853	0.00392795	0.00410745	0.00428704	0.00446671	0.00464647	0.00482632	0.00500625	0.00518627	0.00536637	0.00554657	0.00572685	0.00590722	0.00608768	0.00626822	0.00644886	0.00662958	0.0068104	0.0069913	0.00717229	0.00735338
						0.2385	1.1925	0	0.000177416	0.000354912	0.000532487	0.000710143	0.00088788	0.0010657	0.0012436	0.00142158	0.00159964	0.00177778	0.00195601	0.00213431	0.00231271	0.00249118	0.00266974	0.00284838	0.0030271	0.00320591	0.0033848	0.00356378	0.00374284	0.00392199	0.00410122	0.00428054	0.00445995	0.00463944	0.00481902	0.00499868	0.00517843	0.00535827	0.0055382	0.00571821	0.00589832	0.00607851	0.00625879	0.00643916	0.00661962	0.00680016	0.0069808	0.00716153	0.00734235
						0.239	1.195	0	0.000177144	0.000354369	0.000531673	0.000709059	0.000886524	0.00106407	0.0012417	0.00141941	0.0015972	0.00177507	0.00195303	0.00213107	0.00230919	0.0024874	0.00266568	0.00284406	0.00302251	0.00320105	0.00337968	0.00355839	0.00373718	0.00391606	0.00409503	0.00427408	0.00445322	0.00463244	0.00481176	0.00499115	0.00517064	0.00535021	0.00552987	0.00570962	0.00588946	0.00606939	0.0062494	0.00642951	0.0066097	0.00678998	0.00697036	0.00715082	0.00733138
						0.2395	1.1975	0	0.000176874	0.000353829	0.000530864	0.000707979	0.000885176	0.00106245	0.00123981	0.00141725	0.00159478	0.00177238	0.00195007	0.00212784	0.0023057	0.00248363	0.00266165	0.00283976	0.00301795	0.00319622	0.00337458	0.00355302	0.00373155	0.00391017	0.00408887	0.00426765	0.00444652	0.00462548	0.00480453	0.00498366	0.00516288	0.00534219	0.00552159	0.00570107	0.00588065	0.00606031	0.00624006	0.0064199	0.00659983	0.00677986	0.00695997	0.00714017	0.00732046
						0.24	1.2	0	0.000176606	0.000353291	0.000530058	0.000706905	0.000883834	0.00106084	0.00123794	0.00141511	0.00159236	0.0017697	0.00194712	0.00212463	0.00230222	0.00247989	0.00265764	0.00283548	0.0030134	0.00319141	0.00336951	0.00354768	0.00372595	0.0039043	0.00408273	0.00426125	0.00443986	0.00461856	0.00479734	0.00497621	0.00515517	0.00533421	0.00551335	0.00569257	0.00587188	0.00605128	0.00623077	0.00641035	0.00659002	0.00676978	0.00694963	0.00712957	0.0073096
						0.2405
						0.241
						0.2415
						0.242
						0.2425
						0.243
						0.2435
						0.244
						0.2445
						0.245
						0.2455
						0.246
						0.2465
						0.247
						0.2475
						0.248
						0.2485
						0.249
						0.2495
						0.25
						0.2505
						0.251
						0.2515
						0.252
						0.2525
						0.253
						0.2535
						0.254
						0.2545
						0.255
						0.2555
						0.256
						0.2565
						0.257
						0.2575
						0.258
						0.2585
						0.259
						0.2595
						0.26
						0.2605
						0.261
						0.2615
						0.262
						0.2625
						0.263
						0.2635
						0.264
						0.2645
						0.265
						0.2655
						0.266
						0.2665
						0.267
						0.2675
						0.268
						0.2685
						0.269
						0.2695
						0.27
						0.2705
						0.271
						0.2715
						0.272
						0.2725
						0.273
						0.2735
						0.274
						0.2745
						0.275
						0.2755
						0.276
						0.2765
						0.277
						0.2775
						0.278
						0.2785
						0.279
						0.2795
						0.28
						0.2805
						0.281
						0.2815
						0.282
						0.2825
						0.283
						0.2835
						0.284
						0.2845
						0.285
						0.2855
						0.286
						0.2865
						0.287
						0.2875
						0.288
						0.2885
						0.289
						0.2895
						0.29
						0.2905
						0.291
						0.2915
						0.292
						0.2925
						0.293
						0.2935
						0.294
						0.2945
						0.295
						0.2955
						0.296
						0.2965
						0.297
						0.2975
						0.298
						0.2985
						0.299
						0.2995
						0.3
						0.3005
						0.301
						0.3015
						0.302
						0.3025
						0.303
						0.3035
						0.304
						0.3045
						0.305
						0.3055
						0.306
						0.3065
						0.307
						0.3075
						0.308
						0.3085
						0.309
						0.3095
						0.31
						0.3105
						0.311
						0.3115
						0.312
						0.3125
						0.313
						0.3135
						0.314
						0.3145
						0.315
						0.3155
						0.316
						0.3165
						0.317
						0.3175
						0.318
						0.3185
						0.319
						0.3195
						0.32
						0.3205
						0.321
						0.3215
						0.322
						0.3225
						0.323
						0.3235
						0.324
						0.3245
						0.325
						0.3255
						0.326
						0.3265
						0.327
						0.3275
						0.328
						0.3285
						0.329
						0.3295
						0.33
						0.3305
						0.331
						0.3315
						0.332
						0.3325
						0.333
						0.3335
						0.334
						0.3345
						0.335
						0.3355
						0.336
						0.3365
						0.337
						0.3375
						0.338
						0.3385
						0.339
						0.3395
						0.34
						0.3405
						0.341
						0.3415
						0.342
						0.3425
						0.343
						0.3435
						0.344
						0.3445
						0.345
						0.3455
						0.346
						0.3465
						0.347
						0.3475
						0.348
						0.3485
						0.349
						0.3495
						0.35
						0.3505
						0.351
						0.3515
						0.352
						0.3525
						0.353
						0.3535
						0.354
						0.3545
						0.355
						0.3555
						0.356
						0.3565
						0.357
						0.3575
						0.358
						0.3585
						0.359
						0.3595
						0.36
						0.3605
						0.361
						0.3615
						0.362
						0.3625
						0.363
						0.3635
						0.364
						0.3645
						0.365
						0.3655
						0.366
						0.3665
						0.367
						0.3675
						0.368
						0.3685
						0.369
						0.3695
						0.37
						0.3705
						0.371
						0.3715
						0.372
						0.3725
						0.373
						0.3735
						0.374
						0.3745
						0.375
						0.3755
						0.376
						0.3765
						0.377
						0.3775
						0.378
						0.3785
						0.379
						0.3795
						0.38
						0.3805
						0.381
						0.3815
						0.382
						0.3825
						0.383
						0.3835
						0.384
						0.3845
						0.385
						0.3855
						0.386
						0.3865
						0.387
						0.3875
						0.388
						0.3885
						0.389
						0.3895
						0.39
						0.3905
						0.391
						0.3915
						0.392
						0.3925
						0.393
						0.3935
						0.394
						0.3945
						0.395
						0.3955
						0.396
						0.3965
						0.397
						0.3975
						0.398
						0.3985
						0.399
						0.3995
						0.4
						0.4005
						0.401
						0.4015
						0.402
						0.4025
						0.403
						0.4035
						0.404
						0.4045
						0.405
						0.4055
						0.406
						0.4065
						0.407
						0.4075
						0.408
						0.4085
						0.409
						0.4095
						0.41
						0.4105
						0.411
						0.4115
						0.412
						0.4125
						0.413
						0.4135
						0.414
						0.4145
						0.415
						0.4155
						0.416
						0.4165
						0.417
						0.4175
						0.418
						0.4185
						0.419
						0.4195
						0.42
						0.4205
						0.421
						0.4215
						0.422
						0.4225
						0.423
						0.4235
						0.424
						0.4245
						0.425
						0.4255
						0.426
						0.4265
						0.427
						0.4275
						0.428
						0.4285
						0.429
						0.4295
						0.43
						0.4305
						0.431
						0.4315
						0.432
						0.4325
						0.433
						0.4335
						0.434
						0.4345
						0.435
						0.4355
						0.436
						0.4365
						0.437
						0.4375
						0.438
						0.4385
						0.439
						0.4395
						0.44
						0.4405
						0.441
						0.4415
						0.442
						0.4425
						0.443
						0.4435
						0.444
						0.4445
						0.445
						0.4455
						0.446
						0.4465
						0.447
						0.4475
						0.448
						0.4485
						0.449
						0.4495
						0.45
						0.4505
						0.451
						0.4515
						0.452
						0.4525
						0.453
						0.4535
						0.454
						0.4545
						0.455
						0.4555
						0.456
						0.4565
						0.457
						0.4575
						0.458
						0.4585
						0.459
						0.4595
						0.46
						0.4605
						0.461
						0.4615
						0.462
						0.4625
						0.463
						0.4635
						0.464
						0.4645
						0.465
						0.4655
						0.466
						0.4665
						0.467
						0.4675
						0.468
						0.4685
						0.469
						0.4695
						0.47
						0.4705
						0.471
						0.4715
						0.472
						0.4725
						0.473
						0.4735
						0.474
						0.4745
						0.475
						0.4755
						0.476
						0.4765
						0.477
						0.4775
						0.478
						0.4785
						0.479
						0.4795
						0.48
						0.4805
						0.481
						0.4815
						0.482
						0.4825
						0.483
						0.4835
						0.484
						0.4845
						0.485
						0.4855
						0.486
						0.4865
						0.487
						0.4875
						0.488
						0.4885
						0.489
						0.4895
						0.49
						0.4905
						0.491
						0.4915
						0.492
						0.4925
						0.493
						0.4935
						0.494
						0.4945
						0.495
						0.4955
						0.496
						0.4965
						0.497
						0.4975
						0.498
						0.4985
						0.499
						0.4995
						0.5
						0.5005
						0.501
						0.5015
						0.502
						0.5025
						0.503
						0.5035
						0.504
						0.5045
						0.505
						0.5055
						0.506
						0.5065
						0.507
						0.5075
						0.508
						0.5085
						0.509
						0.5095
						0.51
						0.5105
						0.511
						0.5115
						0.512
						0.5125
						0.513
						0.5135
						0.514
						0.5145
						0.515
						0.5155
						0.516
						0.5165
						0.517
						0.5175
						0.518
						0.5185
						0.519
						0.5195
						0.52
						0.5205
						0.521
						0.5215
						0.522
						0.5225
						0.523
						0.5235
						0.524
						0.5245
						0.525
						0.5255
						0.526
						0.5265
						0.527
						0.5275
						0.528
						0.5285
						0.529
						0.5295
						0.53
						0.5305
						0.531
						0.5315
						0.532
						0.5325
						0.533
						0.5335
						0.534
						0.5345
						0.535
						0.5355
						0.536
						0.5365
						0.537
						0.5375
						0.538
						0.5385
						0.539
						0.5395
						0.54
						0.5405
						0.541
						0.5415
						0.542
						0.5425
						0.543
						0.5435
						0.544
						0.5445
						0.545
						0.5455
						0.546
						0.5465
						0.547
						0.5475
						0.548
						0.5485
						0.549
						0.5495
						0.55
						0.5505
						0.551
						0.5515
						0.552
						0.5525
						0.553
						0.5535
						0.554
						0.5545
						0.555
						0.5555
						0.556
						0.5565
						0.557
						0.5575
						0.558
						0.5585
						0.559
						0.5595
						0.56
						0.5605
						0.561
						0.5615
						0.562
						0.5625
						0.563
						0.5635
[truncated: 873 more rows]
[truncated: 1,959 more columns]

## Sheet: Fig4
plot a	translated lines of miscibility										plot b	MCM C97OOH	http://mcm.leeds.ac.uk/MCM/browse.htt?species=C97OOH							Plot c	PEG
[truncated: 10,002 more rows]

[truncated: 6 more sheets: Fig5, Fig7, Fig 8, Fig10, Fig11, Fig12 TableS6]
